# Supplementary material for: Ligand-Controlled Regiodivergent and Enantioselective C-H Cyanation of Secondary Amines
Source: Research Square preprint supplement (doi:10.21203/rs.3.rs-6472539/v1), 2025-04-28

# Ligand-Controlled Regiodivergent and Enantioselective C–H Cyanation of Secondary Amines

Yang-Jie Mao, Huan-Le Li, Qi Pan, Kun Zhou, Zhen-Yuan Xu, Shao-Jie Lou\*, and Dan-Qian Xu\*

Catalytic Hydrogenation Research Center, State Key Laboratory Breeding Base of Green Chemistry-  
Synthesis Technology, Key Laboratory of Green Pesticides and Cleaner Production Technology of  
Zhejiang Province, Zhejiang University of Technology, Hangzhou 310014, P. R. China

## Table of Contents

|                                                                                               |    |
|-----------------------------------------------------------------------------------------------|----|
| 1. General Information.....                                                                   | 2  |
| 2. Synthesis of Starting Materials and Ligands .....                                          | 2  |
| 2.1 Procedure for the synthesis of urea substrates <b>S1</b> .....                            | 2  |
| 2.2 Procedure for the synthesis of <i>N</i> -chloro compounds <b>1</b> .....                  | 15 |
| 2.3 Procedure for the synthesis of deuterated substrates .....                                | 16 |
| 2.4 Procedure for the synthesis of new developed chiral ligands .....                         | 18 |
| 3. Optimization of the Reaction Conditions .....                                              | 24 |
| 4. General Procedure for Selective Cyanation of $\alpha'/\beta$ -C(sp <sup>3</sup> )-H .....  | 28 |
| 5. Crude <sup>1</sup> H NMR Analysis for Regiodivergent Cyanation .....                       | 29 |
| 6. Mechanistic Studies .....                                                                  | 30 |
| 6.1. Nonlinear relationship between enantiopurity of <b>L24</b> and product <b>3a</b> * ..... | 30 |
| 6.2. Deuteration experiments.....                                                             | 31 |
| 6.3. KIE experiments.....                                                                     | 33 |
| 6.4. Proposed mechanism .....                                                                 | 36 |
| 6.5. DFT calculations for BDE analysis .....                                                  | 37 |
| 7. Characterization of Cyanation Compounds.....                                               | 46 |
| 7.1 $\alpha'$ -Cyanation products.....                                                        | 46 |
| 7.2 $\beta$ -Cyanation products .....                                                         | 53 |
| 8. X-Ray Data for <b>2d</b> and <b>3k</b> .....                                               | 80 |
| 9. References .....                                                                           | 82 |
| 10. NMR Spectra.....                                                                          | 83 |

## 1. General Information

Unless otherwise stated, all experiments were carried out under air atmosphere. The reagents and solvents were purchased from commercial suppliers and used without further purification unless noted.  $^1\text{H}$  NMR and  $^{13}\text{C}$  NMR spectra were obtained on a Bruker AVANCE III 400/600 instrument in  $\text{CDCl}_3$  using TMS as an internal standard, operating at 400/600 MHz and 101MHz, respectively. Chemical shifts ( $\delta$ ) are expressed in ppm and coupling constants  $J$  are given in Hz. For  $\text{CDCl}_3$  solutions the chemical shifts are reported as parts per million (ppm) to residual protium or carbon of the solvents;  $\text{CHCl}_3$   $\delta\text{H}$  (7.26 ppm) and  $\text{CDCl}_3$   $\delta\text{C}$  (77.03 ppm).  $^{19}\text{F}$  NMR were recorded on a Bruker AVANCE III. Multiplicities are reported using the following abbreviations: s = singlet, d = doublet, t = triplet, q = quartet, dd = doublet of doublets, td = triplet of doublets, ddd = doublet of doublet of doublets, m = multiplet. HPLC experiments were carried out using Agilent 1260 Infinity II. GC experiments were carried out using Agilent 7890B GC. GC-MS experiments that used dodecane as an internal standard were performed with a Thermo DSQ II, Trace GC Ultra. High resolution mass spectra (HRMS (ESI-TOF)) were obtained on an Agilent 6545 Q-TOF LC-MS spectrometer equipped with an ESI source. Enantiomeric ratio was determined by an Agilent 1260 chromatography, using chiral HPLC columns Chiralpak® with hexane and *i*-PrOH as solvents.

## 2. Synthesis of Starting Materials and Ligands

### 2.1 Procedure for the synthesis of urea substrates S1

#### Method A:

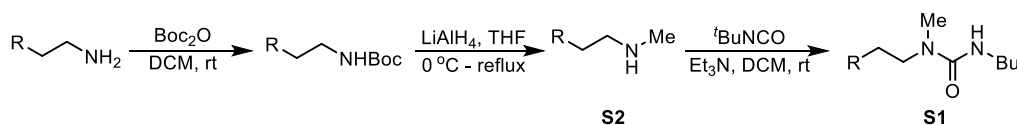

To a stirred solution of primary amine (5 mmol, 1.0 equiv) in DCM (15 mL) was added  $\text{Boc}_2\text{O}$  (6 mmol, 1.2 equiv) dropwise. The mixture was stirred at room temperature for 3 h, then the solvent was removed under reduced pressure. The residue was purified by flash column chromatography (PE / EA = 3 / 1) to provide Boc-protected amines.

To a stirred solution of Boc-protected amines (5 mmol) in THF (10 mL) was added  $\text{LiAlH}_4$  (10 mmol, 2.0 equiv) in several portions (*caution: gas extrusion!*) at 0 °C under  $\text{N}_2$  atmosphere. The reaction was reflux for 6 h. After completed, the mixture was cooled to room temperature and carefully quenched with EtOAc. Then solvent was removed under reduced pressure and DCM (50 mL) was added. The insoluble substance was filtered, washed with DCM (3  $\times$  50 mL) and the collected solvent was removed under reduced pressure. The residue was purified by flash column chromatography (PE / EA = 3 / 1 to MeOH) to provide **S2**.

To a stirred solution of **S2** (3.5 mmol) in DCM (15 mL) was dropwise added  $\text{tBuNCO}$  (4.2 mmol, 1.2 equiv) and  $\text{Et}_3\text{N}$  (4.2 mmol, 1.2 equiv). After stirring for 3 h, the solvent was removed under reduced pressure and the residue was purified by flash column chromatography (PE / EA = 3 / 1) to provide the target compound **S1**.

#### Method B:

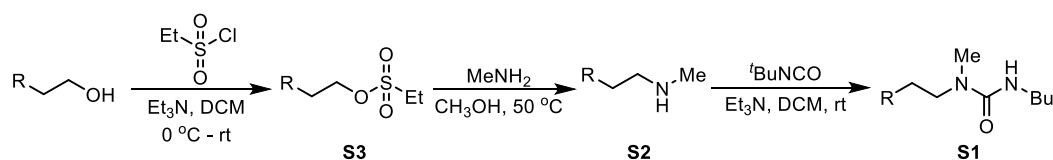

To a stirred solution of primary alcohol (10 mmol, 1.0 equiv) in DCM (50 mL) was dropwise added EtSO<sub>2</sub>Cl (12 mmol, 1.2 equiv) and Et<sub>3</sub>N (12 mmol, 1.2 equiv) at 0 °C. The reaction was allowed to warm to room temperature and stirred for 1 h. After completed, the solvent was removed under reduced pressure, and the residue was purified by flash column chromatography (PE / EA = 10 / 1) to provide **S3**.

To a stirred solution of **S3** (8 mmol) in MeOH (4 mL) was added MeNH<sub>2</sub> (3.31g, 30% wt in MeOH, 4 equiv) and the mixture was stirred at 50 °C overnight. After completed, the mixture was cooled to room temperature, concentrated, and purified by flash column chromatography (PE / EA = 3 / 1 to MeOH) to provide **S2**.

To a stirred solution of **S2** (5.4 mmol) in DCM (20 mL) was dropwise added <sup>t</sup>BuNCO (6.5 mmol, 1.2 equiv) and Et<sub>3</sub>N (6.5 mmol, 1.2 equiv). After stirring for 3 h, the solvent was removed under reduced pressure and the residue was purified by flash column chromatography (PE / EA = 3 / 1) to provide the target compound **S1**.

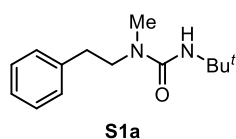

**3-(tert-Butyl)-1-methyl-1-phenethylurea (S1a):** Prepared *via* Method A from *N*-methyl-2-phenylethan-1-amine (**S3a**, 5 mmol) in 95% yield as a white solid.

<sup>1</sup>H NMR (400 MHz, Chloroform-*d*)  $\delta$  = 7.31–7.27 (m, 2H), 7.24–7.18 (m, 3H), 3.86 (s, 1H), 3.42 (t, *J* = 7.0 Hz, 2H), 2.80 (t, *J* = 7.0 Hz, 2H), 2.80 (s, 3H), 1.22 (s, 9H).

<sup>13</sup>C NMR (101 MHz, Chloroform-*d*)  $\delta$  = 157.4, 139.5, 128.9 (2C), 128.7 (2C), 126.4, 51.2, 50.4, 34.6, 34.5, 29.4 (3C).

HRMS (ESI-TOF): [M+Na]<sup>+</sup> calcd. for C<sub>14</sub>H<sub>22</sub>N<sub>2</sub>ONa: 257.1624, found: 257.1635.

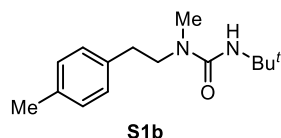

**3-(tert-Butyl)-1-methyl-1-(4-methylphenethyl)urea (S1b):** Prepared *via* Method A from 2-(*p*-tolyl)ethan-1-amine (5 mmol) in 55% yield as a white solid.

<sup>1</sup>H NMR (400 MHz, Chloroform-*d*)  $\delta$  = 7.12–7.06 (m, 4H), 3.83 (s, 1H), 3.39 (t, *J* = 7.0 Hz, 2H), 2.81 (s, 3H), 2.76 (t, *J* = 7.1 Hz, 2H), 2.31 (s, 3H), 1.21 (s, 9H).

<sup>13</sup>C NMR (101 MHz, Chloroform-*d*)  $\delta$  = 157.5, 136.4, 136.0, 129.4 (2C), 128.8 (2C), 51.4, 50.4, 34.5, 34.1, 29.3 (3C), 21.0.

HRMS (ESI-TOF): [M+Na]<sup>+</sup> calcd. for C<sub>15</sub>H<sub>24</sub>N<sub>2</sub>ONa: 271.1781, found: 271.1788.

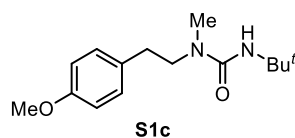

**3-(tert-Butyl)-1-(4-methoxyphenethyl)-1-methylurea (S1c):** Prepared *via* Method B from 2-(4-methoxyphenyl)ethan-1-ol (10 mmol) in 42% yield as a pale-yellow solid.

<sup>1</sup>H NMR (400 MHz, Chloroform-*d*)  $\delta$  = 7.10 (d, *J* = 8.6 Hz, 2H), 6.83 (d, *J* = 8.6 Hz, 2H), 3.85 (s, 1H), 3.78 (s, 3H), 3.38 (t, *J* = 7.0 Hz, 2H), 2.80 (s, 3H), 2.74 (t, *J* = 7.0 Hz, 2H), 1.22 (s, 9H).

<sup>13</sup>C NMR (101 MHz, Chloroform-*d*)  $\delta$  = 158.3, 157.4, 131.5, 129.9 (2C), 114.1 (2C), 55.3, 51.4, 50.4, 34.5, 33.6, 29.4 (3C).

**HRMS** (ESI-TOF):  $[M+Na]^+$  calcd. for  $C_{15}H_{24}N_2O_2Na$ : 287.1730, found: 287.1743.

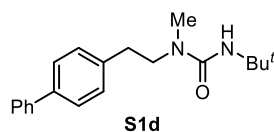

**1-(2-([1,1'-Biphenyl]-4-yl)ethyl)-3-(tert-butyl)-1-methylurea (S1d)**: Prepared *via* Method B from 2-([1,1'-biphenyl]-4-yl)ethan-1-ol (10 mmol) in 44% yield as a white solid.

**$^1H$  NMR** (400 MHz, Chloroform-*d*)  $\delta$  = 7.55 (dd,  $J$  = 13.5, 7.9 Hz, 4H), 7.43 (t,  $J$  = 7.6 Hz, 2H), 7.34 (t,  $J$  = 7.3 Hz, 1H), 7.28 (d,  $J$  = 8.1 Hz, 2H), 3.89 (s, 1H), 3.47 (t,  $J$  = 7.0 Hz, 2H), 2.86 (t,  $J$  = 6.9 Hz, 2H), 2.84 (s, 3H), 1.23 (s, 9H).

**$^{13}C$  NMR** (101 MHz, Chloroform-*d*)  $\delta$  = 157.4, 140.9, 139.5, 138.6, 129.4 (2C), 128.8 (2C), 127.5 (2C), 127.2, 127.0 (2C), 51.2, 50.5, 34.6, 34.3, 29.4 (3C).

**HRMS** (ESI-TOF):  $[M+Na]^+$  calcd. for  $C_{20}H_{26}N_2ONa$ : 333.1937, found: 333.1950.

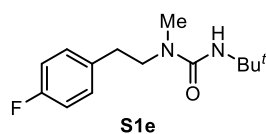

**3-(tert-Butyl)-1-(4-fluorophenethyl)-1-methylurea (S1e)**: Prepared *via* Method A from 2-(4-fluorophenyl)ethan-1-amine (5 mmol) in 51% yield as a white solid.

**$^1H$  NMR** (400 MHz, Chloroform-*d*)  $\delta$  = 7.14 (dd,  $J$  = 8.3, 5.5 Hz, 2H), 6.96 (t,  $J$  = 8.5 Hz, 2H), 3.93 (s, 1H), 3.41 (t,  $J$  = 7.1 Hz, 2H), 2.77 (t,  $J$  = 7.0 Hz, 2H), 2.77 (s, 3H), 1.25 (s, 9H).

**$^{13}C$  NMR** (101 MHz, Chloroform-*d*)  $\delta$  = 161.6 (d,  $J$  = 244.3 Hz), 157.3, 135.2 (d,  $J$  = 3.1 Hz), 130.3 (d,  $J$  = 7.8 Hz, 2C), 115.4 (d,  $J$  = 21.0 Hz, 2C), 51.0, 50.5, 34.7, 33.8, 29.4 (3C).

**HRMS** (ESI-TOF):  $[M+Na]^+$  calcd. for  $C_{14}H_{21}N_2OFNa$ : 275.1530, found: 275.1540.

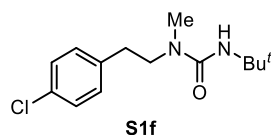

**3-(tert-Butyl)-1-(4-chlorophenethyl)-1-methylurea (S1f)**: Prepared *via* Method A from 2-(4-chlorophenyl)ethan-1-amine (5 mmol) in 56% yield as a white solid.

**$^1H$  NMR** (400 MHz, Chloroform-*d*)  $\delta$  = 7.25 (d,  $J$  = 8.3 Hz, 2H), 7.12 (d,  $J$  = 8.3 Hz, 2H), 3.93 (s, 1H), 3.41 (t,  $J$  = 7.1 Hz, 2H), 2.77 (t,  $J$  = 7.1 Hz, 2H), 2.76 (s, 3H), 1.25 (s, 9H).

**$^{13}C$  NMR** (101 MHz, Chloroform-*d*)  $\delta$  = 157.2, 138.0, 132.2, 130.3 (2C), 128.7 (2C), 50.8, 50.6, 34.7, 34.0, 29.4 (3C).

**HRMS** (ESI-TOF):  $[M+Na]^+$  calcd. for  $C_{14}H_{21}N_2OCINa$ : 291.1235, found: 291.1246.

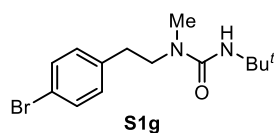

**1-(4-Bromophenethyl)-3-(tert-butyl)-1-methylurea (S1g)**: Prepared *via* Method B from 2-(4-bromophenyl)ethan-1-ol (10 mmol) in 43% yield as a white solid.

**$^1H$  NMR** (400 MHz, Chloroform-*d*)  $\delta$  = 7.42–7.38 (m, 2H), 7.08–7.05 (m, 2H), 4.06 (s, 1H), 3.41 (t,  $J$  = 7.0 Hz, 2H), 2.79 (t,  $J$  = 9.0 Hz, 2H), 2.76 (s, 3H), 1.26 (s, 9H).



$^{13}\text{C}$  NMR (101 MHz, Chloroform-*d*)  $\delta$  = 157.0, 138.4, 131.7 (2C), 130.7 (2C), 120.2, 50.8, 50.7, 34.9, 34.0, 29.4 (3C).

HRMS (ESI-TOF):  $[\text{M}+\text{Na}]^+$  calcd. for  $\text{C}_{14}\text{H}_{21}\text{N}_2\text{OBrNa}$ : 335.0729, found: 335.0734.

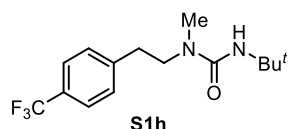

**3-(*tert*-Butyl)-1-methyl-1-(4-(trifluoromethyl)phenethyl)urea (S1h):** Prepared *via* Method A from 2-(4-(trifluoromethyl)phenyl)ethan-1-amine (5 mmol) in 57% yield as a white solid.

$^1\text{H}$  NMR (400 MHz, Chloroform-*d*)  $\delta$  = 7.53 (d,  $J$  = 7.9 Hz, 2H), 7.31 (d,  $J$  = 7.9 Hz, 2H), 3.96 (s, 1H), 3.47 (t,  $J$  = 7.1 Hz, 2H), 2.87 (t,  $J$  = 7.2 Hz, 2H), 2.78 (s, 3H), 1.25 (s, 9H).

$^{13}\text{C}$  NMR (101 MHz, Chloroform-*d*)  $\delta$  = 157.1, 143.7, 129.3 (2C), 128.7 (q,  $J$  = 32.5 Hz), 125.5 (q,  $J$  = 3.8 Hz, 2C), 124.3 (q,  $J$  = 272.8 Hz), 50.6, 50.5, 34.8, 34.5, 29.4 (3C).

HRMS (ESI-TOF):  $[\text{M}+\text{Na}]^+$  calcd. for  $\text{C}_{15}\text{H}_{21}\text{N}_2\text{OF}_3\text{Na}$ : 325.1498, found: 325.1508.

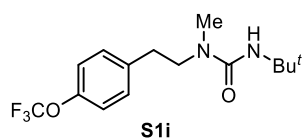

**3-(*tert*-Butyl)-1-methyl-1-(4-(trifluoromethoxy)phenethyl)urea (S1i):** Prepared *via* Method A from 2-(4-(trifluoromethoxy)phenyl)ethan-1-amine (5 mmol) in 49% yield as a white solid.

$^1\text{H}$  NMR (400 MHz, Chloroform-*d*)  $\delta$  = 7.21 (d,  $J$  = 8.5 Hz, 2H), 7.13 (d,  $J$  = 8.5 Hz, 2H), 3.94 (s, 1H), 3.44 (t,  $J$  = 7.1 Hz, 2H), 2.81 (t,  $J$  = 7.2 Hz, 2H), 2.78 (s, 3H), 1.25 (s, 9H).

$^{13}\text{C}$  NMR (101 MHz, Chloroform-*d*)  $\delta$  = 157.2, 147.8 (d,  $J$  = 1.9 Hz), 138.3, 130.2 (2C), 121.1 (2C), 120.5 (q,  $J$  = 257.8 Hz), 50.7, 50.6, 34.7, 33.9, 29.4 (3C).

HRMS (ESI-TOF):  $[\text{M}+\text{Na}]^+$  calcd. for  $\text{C}_{15}\text{H}_{21}\text{N}_2\text{O}_2\text{F}_3\text{Na}$ : 341.1447, found: 341.1459.

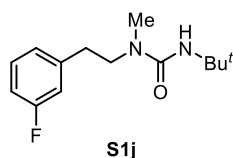

**3-(*tert*-Butyl)-1-(3-fluorophenethyl)-1-methylurea (S1j):** Prepared *via* Method A from 2-(3-fluorophenyl)ethan-1-amine (5 mmol) in 59% yield as a white solid.

$^1\text{H}$  NMR (400 MHz, Chloroform-*d*)  $\delta$  = 7.28–7.22 (m, 1H), 6.98 (d,  $J$  = 7.6 Hz, 1H), 6.93–6.88 (m, 2H), 4.02 (s, 1H), 3.44 (t,  $J$  = 7.1 Hz, 2H), 2.81 (t,  $J$  = 7.1 Hz, 2H), 2.78 (s, 3H), 1.26 (s, 9H).

$^{13}\text{C}$  NMR (101 MHz, Chloroform-*d*)  $\delta$  = 163.0 (d,  $J$  = 246.0 Hz), 157.1, 142.1 (d,  $J$  = 7.2 Hz), 130.1 (d,  $J$  = 8.3 Hz), 124.6 (d,  $J$  = 2.9 Hz), 115.8 (d,  $J$  = 20.8 Hz), 113.3 (d,  $J$  = 21.0 Hz), 50.8, 50.6, 34.8, 34.4 (d,  $J$  = 1.7 Hz), 29.4 (3C).

HRMS (ESI-TOF):  $[\text{M}+\text{Na}]^+$  calcd. for  $\text{C}_{14}\text{H}_{21}\text{N}_2\text{OFNa}$ : 275.1530, found: 275.1540.

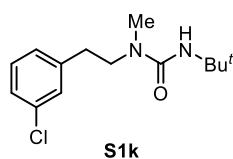

**3-(*tert*-Butyl)-1-(3-chlorophenethyl)-1-methylurea (S1k):** Prepared *via* Method A from 2-(3-chlorophenyl)ethan-1-amine (5 mmol) in 62% yield as a white solid.

**<sup>1</sup>H NMR** (400 MHz, Chloroform-*d*)  $\delta$  = 7.26–7.18 (m, 3H), 7.09–7.06 (m, 1H), 3.95 (s, 1H), 3.43 (t, *J* = 7.1 Hz, 2H), 2.78 (t, *J* = 7.1 Hz, 2H), 2.78 (s, 3H), 1.26 (s, 9H).

**<sup>13</sup>C NMR** (101 MHz, Chloroform-*d*)  $\delta$  = 157.2, 141.6, 134.3, 129.9, 123.0, 127.2, 126.6, 50.7, 50.6, 34.7, 34.3, 29.4 (2C).

**HRMS** (ESI-TOF):  $[M+Na]^+$  calcd. for C<sub>14</sub>H<sub>21</sub>N<sub>2</sub>OCINa: 291.1235, found: 291.1247.

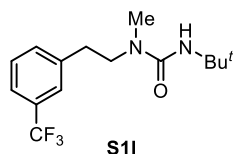

**3-(tert-Butyl)-1-methyl-1-(3-(trifluoromethyl)phenethyl)urea (S1l)**: Prepared *via* Method A from 2-(3-(trifluoromethyl)phenyl)ethan-1-amine (5 mmol) in 52% yield as a white solid.

**<sup>1</sup>H NMR** (400 MHz, Chloroform-*d*)  $\delta$  = 7.48–7.45 (m, 1H), 7.44–7.33 (m, 3H), 3.99 (s, 1H), 3.47 (t, *J* = 7.2 Hz, 2H), 2.87 (t, *J* = 7.2 Hz, 2H), 2.76 (s, 3H), 1.26 (s, 9H).

**<sup>13</sup>C NMR** (101 MHz, Chloroform-*d*)  $\delta$  = 157.1, 140.4, 132.4 (d, *J* = 1.4 Hz), 130.8 (q, *J* = 32.0 Hz), 123.0, 125.6 (q, *J* = 3.6 Hz), 124.1 (q, *J* = 273.3 Hz), 123.2 (q, *J* = 3.8 Hz), 50.6, 50.6, 34.8, 34.4, 29.4 (3C).

**HRMS** (ESI-TOF):  $[M+Na]^+$  calcd. for C<sub>15</sub>H<sub>21</sub>N<sub>2</sub>OF<sub>3</sub>Na: 325.1498, found: 325.1508.

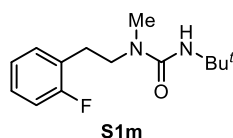

**3-(tert-Butyl)-1-methyl-1-(2-fluorophenethyl)urea (S1m)**: Prepared *via* Method A from 2-(2-fluorophenyl)ethan-1-amine (5 mmol) in 47% yield as a white solid.

**<sup>1</sup>H NMR** (400 MHz, Chloroform-*d*)  $\delta$  = 7.23–7.17 (m, 2H), 7.08–6.99 (m, 2H), 4.13 (s, 1H), 3.41 (t, *J* = 7.3 Hz, 2H), 2.86 (t, *J* = 7.3 Hz, 2H), 2.82 (s, 3H), 1.27 (s, 9H).

**<sup>13</sup>C NMR** (101 MHz, Chloroform-*d*)  $\delta$  = 161.4 (d, *J* = 244.7 Hz), 157.2, 131.4 (d, *J* = 4.8 Hz), 128.3 (d, *J* = 8.1 Hz), 126.8 (d, *J* = 15.8 Hz), 124.3 (d, *J* = 3.7 Hz), 115.3 (d, *J* = 22.0 Hz), 50.6, 49.5, 34.6, 29.4 (3C), 28.1 (d, *J* = 1.8 Hz).

**HRMS** (ESI-TOF):  $[M+Na]^+$  calcd. for C<sub>14</sub>H<sub>21</sub>N<sub>2</sub>OFNa: 275.1530, found: 275.1538.

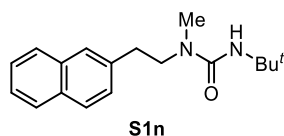

**3-(tert-Butyl)-1-methyl-1-(2-(naphthalen-2-yl)ethyl)urea (S1n)**: Prepared *via* Method A from 2-(naphthalen-2-yl)ethan-1-amine (5 mmol) in 41% yield as a white solid.

**<sup>1</sup>H NMR** (400 MHz, Chloroform-*d*)  $\delta$  = 7.79 (q, *J* = 7.2 Hz, 3H), 7.65 (s, 1H), 7.45 (tt, *J* = 7.0, 5.2 Hz, 2H), 7.34 (dd, *J* = 8.4, 1.8 Hz, 1H), 3.86 (s, 1H), 3.52 (t, *J* = 7.1 Hz, 2H), 2.98 (t, *J* = 7.1 Hz, 2H), 2.82 (s, 3H), 1.16 (s, 9H).

**<sup>13</sup>C NMR** (101 MHz, Chloroform-*d*)  $\delta$  = 157.4, 137.1, 133.7, 132.2, 128.3, 127.6, 127.5, 127.4, 127.3, 126.1, 125.5, 51.1, 50.4, 34.8, 34.7, 29.3 (3C).

**HRMS** (ESI-TOF):  $[M+Na]^+$  calcd. for C<sub>18</sub>H<sub>24</sub>N<sub>2</sub>ONa: 307.1781, found: 307.1792.

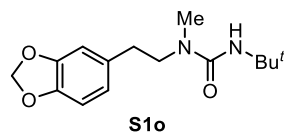

**1-(2-(Benzo[d][1,3]dioxol-5-yl)ethyl)-3-(tert-butyl)-1-methylurea (S1o):** Prepared *via* Method A from 2-(benzo[d][1,3]dioxol-5-yl)ethan-1-amine (5 mmol) in 55% yield as a white solid.

**<sup>1</sup>H NMR** (400 MHz, Chloroform-*d*)  $\delta$  = 6.73 (d,  $J$  = 7.9 Hz, 1H), 6.67 (d,  $J$  = 1.7 Hz, 1H), 6.63 (dd,  $J$  = 7.8, 1.7 Hz, 1H), 5.91 (s, 2H), 3.91 (s, 1H), 3.37 (t,  $J$  = 7.0 Hz, 2H), 2.79 (s, 3H), 2.71 (t,  $J$  = 7.0 Hz, 2H), 1.24 (s, 9H).

**<sup>13</sup>C NMR** (101 MHz, Chloroform-*d*)  $\delta$  = 157.4, 147.8, 146.1, 133.3, 121.7, 109.3, 108.5, 100.9, 51.3, 50.5, 34.6, 34.3, 29.4 (3C).

**HRMS** (ESI-TOF):  $[M+Na]^+$  calcd. for C<sub>15</sub>H<sub>22</sub>N<sub>2</sub>O<sub>3</sub>Na: 301.1523, found: 301.1532.

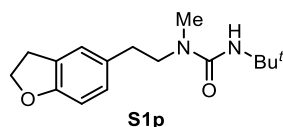

**3-(tert-Butyl)-1-(2-(2,3-dihydrobenzofuran-5-yl)ethyl)-1-methylurea (S1p):** Prepared *via* Method B from 2-(2,3-dihydrobenzofuran-5-yl)ethan-1-ol (10 mmol) in 63% yield as a white solid.

**<sup>1</sup>H NMR** (400 MHz, Chloroform-*d*)  $\delta$  = 7.01 (s, 1H), 6.90 (d,  $J$  = 8.0 Hz, 1H), 6.70 (d,  $J$  = 8.1 Hz, 1H), 4.52 (t,  $J$  = 8.7 Hz, 2H), 3.83 (s, 1H), 3.35 (t,  $J$  = 7.0 Hz, 2H), 3.15 (t,  $J$  = 8.7 Hz, 2H), 2.81 (s, 3H), 2.71 (t,  $J$  = 6.9 Hz, 2H), 1.20 (s, 9H).

**<sup>13</sup>C NMR** (101 MHz, Chloroform-*d*)  $\delta$  = 158.8, 157.5, 131.4, 128.2, 127.4, 125.5, 109.3, 71.2, 51.6, 50.4, 34.4, 33.9, 29.7, 29.3 (3C).

**HRMS** (ESI-TOF):  $[M+Na]^+$  calcd. for C<sub>16</sub>H<sub>24</sub>N<sub>2</sub>O<sub>2</sub>Na: 299.1730, found: 299.1737.

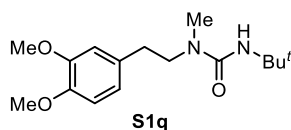

**3-(tert-Butyl)-1-(3,4-dimethoxyphenethyl)-1-methylurea (S1q):** Prepared *via* Method A from 2-(3,4-dimethoxyphenyl)ethan-1-amine (5 mmol) in 55% yield as a white solid.

**<sup>1</sup>H NMR** (400 MHz, Chloroform-*d*)  $\delta$  = 6.79 (d,  $J$  = 7.8 Hz, 1H), 6.73–6.69 (m, 2H), 3.97 (s, 1H), 3.84 (s, 3H), 3.84 (s, 3H), 3.39 (t,  $J$  = 7.1 Hz, 2H), 2.80 (s, 3H), 2.74 (t,  $J$  = 7.1 Hz, 2H), 1.22 (s, 9H).

**<sup>13</sup>C NMR** (101 MHz, Chloroform-*d*)  $\delta$  = 157.3, 149.1, 147.7, 131.9, 120.8, 112.0, 111.5, 55.9, 55.9, 51.3, 50.5, 34.7, 34.1, 29.3 (3C).

**HRMS** (ESI-TOF):  $[M+Na]^+$  calcd. for C<sub>16</sub>H<sub>26</sub>N<sub>2</sub>O<sub>3</sub>Na: 317.1836, found: 317.1846.

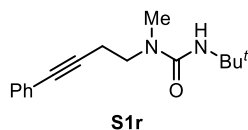

**3-(tert-Butyl)-1-methyl-1-(4-phenylbut-3-yn-1-yl)urea (S1r):** Prepared *via* Method B from 4-phenylbut-3-yn-1-ol (10 mmol, prepared according to the reference procedure<sup>1</sup>) in 46% yield as a white solid.

**<sup>1</sup>H NMR** (400 MHz, Chloroform-*d*)  $\delta$  = 7.38–7.36 (m, 2H), 7.27 (d,  $J$  = 3.3 Hz, 3H), 4.38 (s, 1H), 3.48 (t,  $J$  = 6.7 Hz, 2H), 2.94 (s, 3H), 2.62 (t,  $J$  = 6.7 Hz, 2H), 1.31 (s, 9H).

**<sup>13</sup>C NMR** (101 MHz, Chloroform-*d*)  $\delta$  = 157.3, 131.6, 128.3 (2C), 127.9 (2C), 123.5, 87.9, 82.0, 50.7, 48.3, 35.0, 29.5 (3C), 19.4.

**HRMS** (ESI-TOF):  $[M+Na]^+$  calcd. for C<sub>16</sub>H<sub>22</sub>N<sub>2</sub>ONa: 281.1624, found: 281.1636.

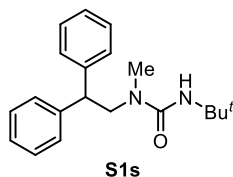

**3-(*tert*-Butyl)-1-(2,2-diphenylethyl)-1-methylurea (S1s):** Prepared *via* Method A from 2,2-diphenylethan-1-amine (5 mmol) in 46% yield as a white solid.

**<sup>1</sup>H NMR** (400 MHz, Chloroform-*d*)  $\delta$  = 7.29–7.23 (m, 8H), 7.21–7.17 (m, 2H), 4.26 (t,  $J$  = 7.9 Hz, 1H), 3.84 (d,  $J$  = 7.9 Hz, 2H), 3.71 (s, 1H), 2.66 (s, 3H), 1.16 (s, 9H).

**<sup>13</sup>C NMR** (101 MHz, Chloroform-*d*)  $\delta$  = 157.5, 142.5 (2C), 128.6 (4C), 128.3 (4C), 126.7 (2C), 54.6, 50.4, 49.7, 34.8, 29.3 (3C).

**HRMS** (ESI-TOF):  $[M+Na]^+$  calcd. for C<sub>20</sub>H<sub>26</sub>N<sub>2</sub>ONa: 333.1937, found: 333.1948.

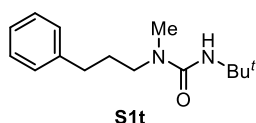

**3-(*tert*-Butyl)-1-methyl-1-(3-phenylpropyl)urea (S1t):** Prepared *via* Method A from 3-phenylpropan-1-amine (5 mmol) in 59% yield as a white solid.

**<sup>1</sup>H NMR** (400 MHz, Chloroform-*d*)  $\delta$  = 7.30–7.26 (m, 2H), 7.19–7.17 (m, 3H), 4.17 (s, 1H), 3.23 (t,  $J$  = 7.7 Hz, 2H), 2.81 (s, 3H), 2.61 (t,  $J$  = 7.7 Hz, 2H), 1.85 (p,  $J$  = 7.6 Hz, 2H), 1.31 (s, 9H).

**<sup>13</sup>C NMR** (101 MHz, Chloroform-*d*)  $\delta$  = 157.2, 141.7, 128.5 (2C), 128.3 (2C), 126.0, 50.7, 48.3, 34.3, 33.0, 29.5 (3C), 29.5.

**HRMS** (ESI-TOF):  $[M+Na]^+$  calcd. for C<sub>15</sub>H<sub>24</sub>N<sub>2</sub>ONa: 271.1781, found: 271.1793.

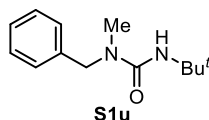

**1-Benzyl-3-(*tert*-butyl)-1-methylurea (S1u):** Prepared *via* Method A from *N*-methyl-1-phenylmethanamine (S3t, 5 mmol) in 96% yield as a white solid.

**<sup>1</sup>H NMR** (400 MHz, Chloroform-*d*)  $\delta$  = 7.35–7.31 (m, 2H), 7.28–7.22 (m, 3H), 4.45 (s, 2H), 4.30 (s, 1H), 2.85 (s, 3H), 1.33 (s, 9H).

**<sup>13</sup>C NMR** (101 MHz, Chloroform-*d*)  $\delta$  = 157.6, 138.2, 128.7 (2C), 127.3, 127.2 (2C), 52.2, 50.8, 34.6, 29.5 (3C).

**HRMS** (ESI-TOF):  $[M+Na]^+$  calcd. for C<sub>13</sub>H<sub>20</sub>N<sub>2</sub>ONa: 243.1468, found: 243.1476.

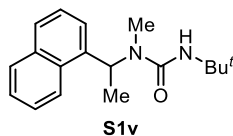

**3-(*tert*-Butyl)-1-methyl-1-(1-(naphthalen-1-yl)ethyl)urea (S1v):** Prepared *via* Method A from 1-(naphthalen-1-yl)ethan-1-amine (5 mmol) in 54% yield as a white solid.

**<sup>1</sup>H NMR** (400 MHz, Chloroform-*d*)  $\delta$  = 8.21 (d,  $J$  = 8.1 Hz, 1H), 7.84 (d,  $J$  = 7.4 Hz, 1H), 7.79 (d,  $J$  = 8.1 Hz, 1H), 7.53–7.43 (m, 4H), 6.33 (q,  $J$  = 6.9 Hz, 1H), 4.19 (s, 1H), 2.37 (s, 3H), 1.61 (d,  $J$  = 6.9 Hz, 3H), 1.39 (s, 9H).

**<sup>13</sup>C NMR** (101 MHz, Chloroform-*d*)  $\delta$  = 156.9, 137.4, 133.8, 132.1, 128.5, 128.4, 126.5, 125.8, 124.8,

124.5, 124.4, 50.8, 48.5, 29.6 (3C), 28.3, 16.5.

**HRMS** (ESI-TOF):  $[M+Na]^+$  calcd. for  $C_{18}H_{24}N_2ONa$ : 307.1781, found: 307.1794.

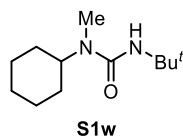

**3-(tert-Butyl)-1-cyclohexyl-1-methylurea (S1w)**: Prepared *via* Method A from cyclohexylamine (5 mmol) in 39% yield as a white solid.

**<sup>1</sup>H NMR** (400 MHz, Chloroform-*d*)  $\delta$  = 4.17 (s, 1H), 3.99 (t,  $J$  = 10.8 Hz, 1H), 2.66 (s, 3H), 1.77–1.74 (m, 2H), 1.65–1.60 (m, 3H), 1.33 (s, 9H), 1.39–1.24 (m, 4H), 1.08–0.98 (m, 1H).

**<sup>13</sup>C NMR** (101 MHz, Chloroform-*d*)  $\delta$  = 157.2, 53.2, 50.7, 30.6 (2C), 29.6 (3C), 28.3, 25.9 (2C), 25.7.

**HRMS** (ESI-TOF):  $[M+Na]^+$  calcd. for  $C_{12}H_{24}N_2ONa$ : 235.1781, found: 235.1788.

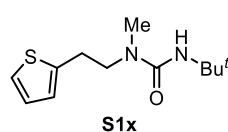

**3-(tert-Butyl)-1-methyl-1-(2-(thiophen-2-yl)ethyl)urea (S1x)**: Prepared *via* Method A from 2-(thiophen-2-yl)ethan-1-amine (5 mmol) in 35% yield as a white solid.

**<sup>1</sup>H NMR** (400 MHz, Chloroform-*d*)  $\delta$  = 7.15 (d,  $J$  = 5.0 Hz, 1H), 6.93 (t,  $J$  = 4.4 Hz, 1H), 6.83 (d,  $J$  = 2.5 Hz, 1H), 3.99 (s, 1H), 3.46 (t,  $J$  = 7.0 Hz, 2H), 3.03 (t,  $J$  = 6.9 Hz, 2H), 2.81 (s, 3H), 1.26 (s, 9H).

**<sup>13</sup>C NMR** (101 MHz, Chloroform-*d*)  $\delta$  = 157.4, 141.6, 127.2, 125.4, 123.9, 51.2, 50.6, 34.6, 29.4 (3C), 28.6.

**HRMS** (ESI-TOF):  $[M+Na]^+$  calcd. for  $C_{12}H_{20}N_2OSNa$ : 263.1189, found: 263.1180.

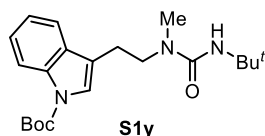

**tert-Butyl 3-(2-(3-(tert-butyl)-1-methylureido)ethyl)-1H-indole-1-carboxylate (S1y)**: Prepared *via* Method A from tryptamine (5 mmol) in 58% yield as a white solid.

**<sup>1</sup>H NMR** (400 MHz, Chloroform-*d*)  $\delta$  = 8.14 (d,  $J$  = 8.3 Hz, 1H), 7.55 (d,  $J$  = 7.7 Hz, 1H), 7.39 (s, 1H), 7.31 (t,  $J$  = 7.7 Hz, 1H), 7.24 (t,  $J$  = 7.2 Hz, 1H), 3.91 (s, 1H), 3.51 (t,  $J$  = 7.0 Hz, 2H), 2.90 (t,  $J$  = 6.9 Hz, 2H), 2.84 (s, 3H), 1.65 (s, 9H), 1.15 (s, 9H).

**<sup>13</sup>C NMR** (101 MHz, Chloroform-*d*)  $\delta$  = 157.4, 149.7, 135.6, 130.3, 124.6, 123.4, 122.7, 118.7, 117.9, 115.4, 83.6, 50.4, 49.2, 34.6, 29.2 (3C), 28.2 (3C), 23.8.

**HRMS** (ESI-TOF):  $[M+Na]^+$  calcd. for  $C_{21}H_{31}N_3O_3Na$ : 396.2258, found: 396.2276.

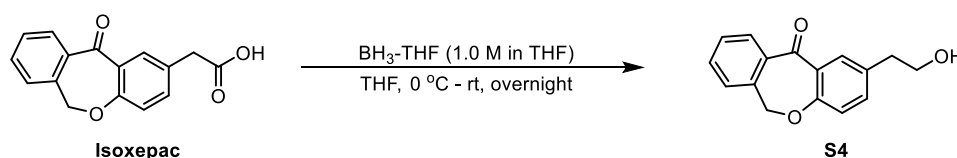

The Isoxepac (10 mmol, 1.0 equiv) was dissolved in dry THF (15 mL) in a 50 mL flame-dried Schlenk tube under  $N_2$  atmosphere. Then the solution was cooled to 0 °C and  $BH_3$ -THF (10 mL, 1.0 M in THF, 1.0 equiv) was added dropwise. The mixture was allowed to warm to room temperature and stirred overnight. After completed, the EtOAc (30 mL) was added carefully to quench the reaction, and the mixture was washed with water (3  $\times$  30 mL). The collected aqueous phase was extracted with EtOAc

(30 mL) for twice. The combined organic phases were dried over MgSO<sub>4</sub>, filtered and concentrated under reduced pressure. The residue was purified by flash column chromatography (PE / EA = 5 / 1) to provide the **S4**. The **S4** could be used to synthesize compound **S1z** under Method B.

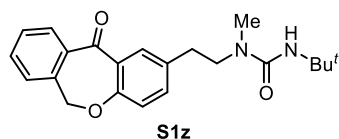

**3-(tert-Butyl)-1-methyl-1-(2-(11-oxo-6,11-dihydrodibenzo[b,e]oxepin-2-yl)ethyl)urea (S1z):**

Prepared *via* Method B from Isoxepac (5 mmol, CAS: 55453-87-7) in 36% yield as a white solid.

<sup>1</sup>H NMR (400 MHz, Chloroform-*d*)  $\delta$  = 8.03 (d, *J* = 2.4 Hz, 1H), 7.88 (d, *J* = 7.7 Hz, 1H), 7.55 (td, *J* = 7.5, 1.4 Hz, 1H), 7.46 (td, *J* = 7.6, 1.3 Hz, 1H), 7.35 (m, 2H), 6.99 (d, *J* = 8.4 Hz, 1H), 5.16 (s, 2H), 4.02 (s, 1H), 3.45 (t, *J* = 7.2 Hz, 2H), 2.82 (t, *J* = 7.2 Hz, 2H), 2.82 (s, 3H), 1.25 (s, 9H).

<sup>13</sup>C NMR (101 MHz, Chloroform-*d*)  $\delta$  = 191.1, 160.0, 157.2, 140.5, 136.3, 135.7, 133.2, 132.8, 131.5, 129.5, 129.2, 127.8, 125.2, 121.0, 73.6, 50.7, 50.6, 34.7, 33.6, 29.4 (3C).

HRMS (ESI-TOF): [M+Na]<sup>+</sup> calcd. for C<sub>22</sub>H<sub>26</sub>N<sub>2</sub>O<sub>3</sub>Na: 389.1836, found: 389.1848.

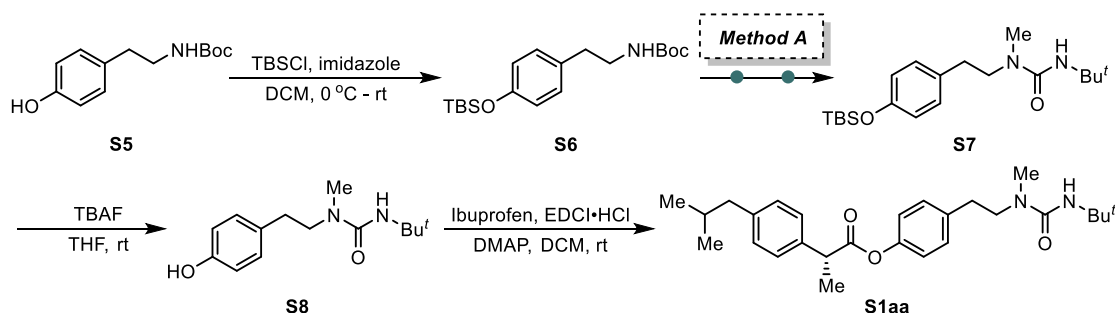

The **S5** was easily prepared from tyramine and Boc<sub>2</sub>O in MeOH according to the reference procedure.<sup>2</sup> To a stirred solution of 4-*N*-(*tert*-butoxycarbonyl)tyramine (20 mmol, 1.0 equiv) and imidazole (24 mmol, 1.2 equiv) in DCM (50 mL) was added TBSCl (24 mmol, 1.2 equiv) dropwise at 0 °C. The reaction was allowed to warm to room temperature and stirred for 3 h. After completed, the solvent was removed under reduced pressure, and the residue was purified by flash column chromatography (PE / EA = 5 / 1) to provide **S6**.

The **S7** could be obtained from **S6** according to Method A. To a stirred solution of **S7** (10 mmol) in THF (30 mL) was added <sup>t</sup>Bu<sub>4</sub>NF (15 mL, 1.0 mL in THF, 1.5 equiv) and the mixture was stirred at room temperature overnight. After completed, the mixture was concentrated and purified by flash column chromatography (PE / EA = 3 / 1) to provide **S8**.

To a stirred solution of **S8** (3 mmol) and Ibuprofen (3 mmol) in DCM (20 mL) was added EDCI·HCl (3.6 mmol, 1.2 equiv) and DMAP (3.6 mmol, 1.2 equiv). After stirred for 6 h, water (15 mL) was added, and the mixture was extracted with CH<sub>2</sub>Cl<sub>2</sub> (3 × 10 mL). The combined organic layers were washed with brine and evaporated under reduced pressure. The residue was purified by flash column chromatography (PE / EA = 3 / 1) to provide **S1aa**.

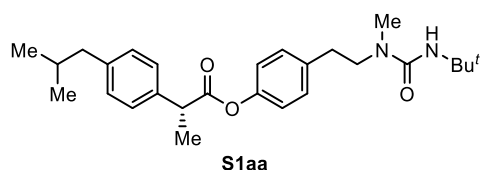

**4-(2-(3-(tert-Butyl)-1-methylureido)ethyl)phenyl (R)-2-(4-isobutylphenyl)propanoate (S1aa):**

Prepared from Ibuprofen (3 mmol) and **S8** in 62% yield as a white solid.

**<sup>1</sup>H NMR** (400 MHz, Chloroform-*d*)  $\delta$  = 7.29 (d, *J* = 8.0 Hz, 2H), 7.14 (t, *J* = 8.1 Hz, 4H), 6.92 (d, *J* = 8.4 Hz, 2H), 3.96 (s, 1H), 3.92 (q, *J* = 7.2 Hz, 1H), 3.41 (t, *J* = 7.2 Hz, 2H), 2.79 (t, *J* = 7.2 Hz, 2H), 2.75 (s, 3H), 2.47 (d, *J* = 7.2 Hz, 2H), 1.86 (dp, *J* = 13.5, 6.7 Hz, 1H), 1.59 (d, *J* = 7.1 Hz, 3H), 1.27 (s, 9H), 0.91 (s, 3H), 0.90 (s, 3H).

**<sup>13</sup>C NMR** (101 MHz, Chloroform-*d*)  $\delta$  = 173.3, 157.3, 149.4, 140.8, 137.3, 136.9, 129.7 (2C), 129.5 (2C), 127.2 (2C), 121.5 (2C), 51.0, 50.6, 45.3, 45.1, 34.8, 34.0, 30.2, 29.4 (3C), 22.4 (2C), 18.5.

**HRMS** (ESI-TOF):  $[M+Na]^+$  calcd. for C<sub>27</sub>H<sub>38</sub>N<sub>2</sub>O<sub>3</sub>Na: 461.2775, found: 461.2792.

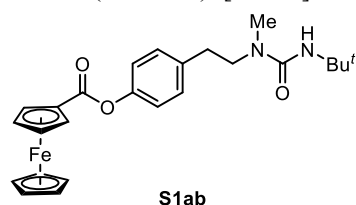

**4-(2-(3-(*tert*-Butyl)-1-methylureido)ethyl)phenyl ferrocenecarboxylate (S1ab)**: Prepared from ferrocenecarboxylic acid and **S8** in 45% yield as an orange-yellow solid by taking the similar synthesis procedure of **S1aa**.

**<sup>1</sup>H NMR** (400 MHz, Chloroform-*d*)  $\delta$  = 7.25 (d, *J* = 8.5 Hz, 2H), 7.11 (d, *J* = 8.4 Hz, 2H), 4.95 (t, *J* = 2.0 Hz, 2H), 4.49 (t, *J* = 2.0 Hz, 2H), 4.29 (s, 5H), 4.00 (s, 1H), 3.46 (t, *J* = 7.3 Hz, 2H), 2.84 (t, *J* = 7.1 Hz, 2H), 2.80 (s, 3H), 1.30 (s, 9H).

**<sup>13</sup>C NMR** (101 MHz, Chloroform-*d*)  $\delta$  = 170.3, 157.3, 149.5, 136.8, 129.8 (2C), 121.8 (2C), 71.9 (2C), 70.6 (2C), 70.1, 70.0 (5C), 51.1, 50.6, 34.8, 34.1, 29.5 (3C).

**HRMS** (ESI-TOF):  $[M+Na]^+$  calcd. for C<sub>25</sub>H<sub>30</sub>N<sub>2</sub>O<sub>3</sub>FeNa: 485.1498, found: 485.1517.

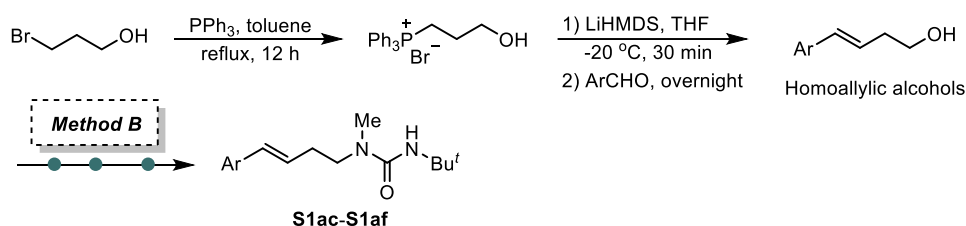

The corresponding homoallylic alcohols were prepared according to the reference procedure.<sup>3</sup> To a stirred solution of PPh<sub>3</sub> (10 mmol, 1.0 equiv) in dry toluene (9 mL) was added 3-bromopropan-1-ol (10 mmol, 1.0 equiv) under N<sub>2</sub> and refluxed for 12 h. After this time, the reaction was allowed to cool to room temperature, solids filtered, washed with cold diethyl ether and dried under vacuum to afford 3-(triphenylphosphonium)propan-1-ol-bromide as a white powder which was used without purification in the next step.

LiHMDS (2.8 mL, 1 M in THF, 3.5 equiv) was added dropwise to 3-(triphenylphosphonium)propan-1-ol-bromide (1 mmol, 1.25 equiv) in THF (5 mL) under N<sub>2</sub> at -20 °C. This was allowed to stir for 30 min before addition of the aldehyde (0.8 mmol, 1.0 equiv). This solution was then stirred overnight and allowed to warm to room temperature. The reaction was quenched by addition of aqueous NH<sub>4</sub>Cl. 1 M HCl was added to take the solution to pH 1, extracted with CH<sub>2</sub>Cl<sub>2</sub>, dried over MgSO<sub>4</sub> and concentrated under reduced pressure. The residue was purified by flash column chromatography (PE / EA = 5 / 1) to yield corresponding homoallylic alcohol, which could be used to synthesize **S1ac-S1af** under Method B.

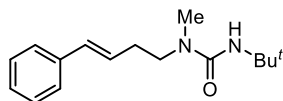

**S1ac**

**3-(*tert*-Butyl)-1-methyl-1-(4-phenylbut-3-en-1-yl)urea (S1ac):** Prepared *via* Method B from benzaldehyde in 39% yield as a white solid.

**<sup>1</sup>H NMR** (400 MHz, Chloroform-*d*)  $\delta$  = 7.32 (t, *J* = 7.2 Hz, 3H), 7.27–7.25 (m, 1H), 7.21–7.15 (m, 1H), 6.44 (d, *J* = 15.8 Hz, 1H), 6.18 (dt, *J* = 15.4, 7.2 Hz, 1H), 4.21 (s, 1H), 3.37 (t, *J* = 7.1 Hz, 2H), 2.85 (s, 3H), 2.43 (q, *J* = 7.0 Hz, 2H), 1.30 (s, 9H).

**<sup>13</sup>C NMR** (101 MHz, Chloroform-*d*)  $\delta$  = 157.3, 137.4, 131.9, 128.5 (2C), 127.3, 127.2, 126.0 (2C), 50.6, 48.7, 34.6, 32.0, 29.5 (3C).

**HRMS** (ESI-TOF): [M+Na]<sup>+</sup> calcd. for C<sub>16</sub>H<sub>24</sub>N<sub>2</sub>ONa: 283.1781, found: 283.1787.

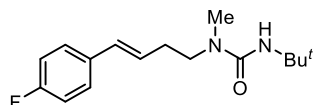

**S1ad**

**3-(*tert*-Butyl)-1-(4-(4-fluorophenyl)but-3-en-1-yl)-1-methylurea (S1ad):** Prepared *via* Method B from 2-fluorobenzaldehyde in 34% yield as a colorless liquid.

**<sup>1</sup>H NMR** (400 MHz, Chloroform-*d*)  $\delta$  = 7.30–7.27 (m, 2H), 6.97 (t, *J* = 8.7 Hz, 2H), 6.39 (d, *J* = 15.8 Hz, 1H), 6.13–6.05 (m, 1H), 4.20 (s, 1H), 3.36 (t, *J* = 7.1 Hz, 2H), 2.85 (s, 3H), 2.41 (q, *J* = 7.1 Hz, 2H), 1.29 (s, 9H).

**<sup>13</sup>C NMR** (101 MHz, Chloroform-*d*)  $\delta$  = 162.1 (d, *J* = 246.0 Hz), 157.3, 133.6 (d, *J* = 3.2 Hz), 130.7, 127.5 (d, *J* = 7.9 Hz, 2C), 127.1 (d, *J* = 2.3 Hz), 115.4 (d, *J* = 21.6 Hz, 2C), 50.7, 48.6, 34.5, 31.9, 29.5 (3C).

**HRMS** (ESI-TOF): [M+Na]<sup>+</sup> calcd. for C<sub>16</sub>H<sub>23</sub>N<sub>2</sub>OFNa: 301.1687, found: 301.1696.

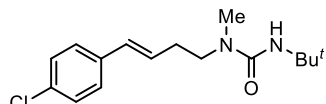

**S1ae**

**3-(*tert*-Butyl)-1-(4-(4-chlorophenyl)but-3-en-1-yl)-1-methylurea (S1ae):** Prepared *via* Method B from 4-chlorobenzaldehyde in 42% yield as a white solid.

**<sup>1</sup>H NMR** (400 MHz, Chloroform-*d*)  $\delta$  = 7.24 (s, 4H), 6.38 (dt, *J* = 15.8, 1.2 Hz, 1H), 6.16 (dt, *J* = 15.8, 7.2 Hz, 1H), 4.19 (s, 1H), 3.37 (t, *J* = 7.1 Hz, 2H), 2.85 (s, 3H), 2.53–2.30 (m, 2H), 1.30 (s, 9H).

**<sup>13</sup>C NMR** (101 MHz, Chloroform-*d*)  $\delta$  = 157.3, 135.9, 132.7, 130.7, 128.6 (2C), 128.2, 127.2 (2C), 50.7, 48.5, 34.5, 32.0, 29.5 (3C).

**HRMS** (ESI-TOF): [M+Na]<sup>+</sup> calcd. for C<sub>16</sub>H<sub>23</sub>N<sub>2</sub>OCINa: 317.1391, found: 317.1401.

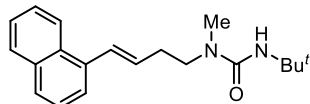

**S1af**

**3-(*tert*-Butyl)-1-methyl-1-(4-(naphthalen-2-yl)but-3-en-1-yl)urea (S1af):** Prepared *via* Method B from 2-naphthaldehyde in 34% yield as a white solid.

**<sup>1</sup>H NMR** (400 MHz, Chloroform-*d*)  $\delta$  = 8.12–8.09 (m, 1H), 7.83 (dd, *J* = 7.0, 2.4 Hz, 1H), 7.75 (d, *J* = 8.2 Hz, 1H), 7.55 (d, *J* = 7.1 Hz, 1H), 7.52–7.45 (m, 2H), 7.44–7.40 (m, 1H), 7.18 (d, *J* = 15.6 Hz, 1H),



6.21 (dt,  $J = 15.4, 7.2$  Hz, 1H), 4.23 (s, 1H), 3.47 (t,  $J = 7.1$  Hz, 2H), 2.90 (s, 3H), 2.59–2.53 (m, 2H), 1.32 (s, 9H).

$^{13}\text{C}$  NMR (101 MHz, Chloroform- $d$ )  $\delta = 157.3, 135.2, 133.6, 131.0, 130.7, 129.1, 128.5, 127.6, 125.9, 125.7, 125.7, 123.8, 123.7, 50.7, 48.6, 34.7, 32.4, 29.6$  (3C).

HRMS (ESI-TOF):  $[\text{M}+\text{Na}]^+$  calcd. for  $\text{C}_{20}\text{H}_{26}\text{N}_2\text{ONa}$ : 333.1937, found: 333.1934.

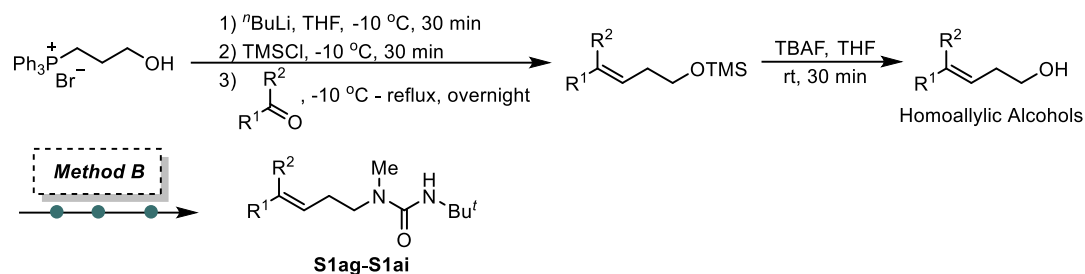

The corresponding homoallylic alcohols were prepared according to the reference procedure.<sup>4</sup> To a suspension of (3-hydroxypropyl)triphenylphosphonium bromide (11 mmol, 1.1 equiv) in THF (20 mL) was added *n*-BuLi (8.8 mL, 2.5 M in hexanes, 2.2 equiv) over 10 min at  $-10$  °C. The reaction mixture was stirred for 30 min and then TMSCl (11 mmol, 1.1 equiv) was added. After stirring for another 30 min, a solution of ketone (10 mmol, 1.0 equiv) in THF (10 mL) was added dropwise. The cold bath was removed and the mixture was refluxed overnight. The mixture was quenched with saturated  $\text{NH}_4\text{Cl}$  (10 mL). The two layers were separated and the aqueous solution was extracted with  $\text{CH}_2\text{Cl}_2$  ( $2 \times 10$  mL). The combined organic layer was washed with brine, dried over  $\text{MgSO}_4$ , filtered, and concentrated. The crude material was dissolved in THF (10 mL), a solution of TBAF (10.0 mL, 1.0 M in THF, 1.0 equiv) was added and stirred for 30 min at room temperature, The solvent was removed by rotary evaporation and the crude product was purified by flash column chromatography (PE / EA = 5 / 1) to afford corresponding homoallylic alcohol, which could be used to synthesize **S1ag-S1ai** under Method B.

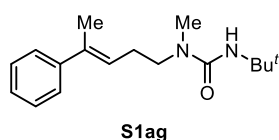

**3-(*tert*-Butyl)-1-methyl-1-(4-phenylpent-3-en-1-yl)urea (S1ag):** Prepared *via* Method B from acetophenone in 27% yield as a white solid.

$^1\text{H}$  NMR (400 MHz, Chloroform- $d$ )  $\delta = 7.37$  (d,  $J = 7.7$  Hz, 2H), 7.30 (t,  $J = 7.5$  Hz, 2H), 7.22 (t,  $J = 7.2$  Hz, 1H), 5.77 (t,  $J = 7.5$  Hz, 1H), 4.22 (s, 1H), 3.34 (t,  $J = 7.1$  Hz, 2H), 2.87 (s, 3H), 2.44 (q,  $J = 7.3$  Hz, 2H), 2.06 (s, 3H), 1.32 (s, 9H).

$^{13}\text{C}$  NMR (101 MHz, Chloroform- $d$ )  $\delta = 157.3, 143.5, 136.9, 128.2$  (2C), 126.8, 125.6 (2C), 124.7, 50.6, 48.7, 34.7, 29.5 (3C), 27.8, 15.8.

HRMS (ESI-TOF):  $[\text{M}+\text{Na}]^+$  calcd. for  $\text{C}_{17}\text{H}_{26}\text{N}_2\text{ONa}$ : 297.1937, found: 297.1942.

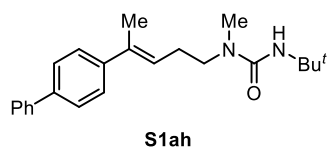

**1-(4-([1,1'-Biphenyl]-4-yl)pent-3-en-1-yl)-3-(*tert*-butyl)-1-methylurea (S1ah):** Prepared *via* Method B from 4-phenylacetophenone in 27% yield as a white solid (major isomer : minor isomer = 2 : 1).

Major isomer:

**<sup>1</sup>H NMR** (400 MHz, Chloroform-*d*)  $\delta$  = 7.60–7.53 (m, 4H), 7.46–7.31 (m, 3H), 7.24 (d,  $J$  = 7.4 Hz, 2H), 5.48 (t,  $J$  = 7.4 Hz, 1H), 4.15 (s, 1H), 3.21 (t,  $J$  = 7.1 Hz, 1H), 2.72 (s, 3H), 2.25 (q,  $J$  = 7.1 Hz, 2H), 2.07 (s, 3H), 1.30 (s, 9H).

**<sup>13</sup>C NMR** (101 MHz, Chloroform-*d*)  $\delta$  = 157.3, 140.8, 140.7, 139.6, 138.4, 128.8 (2C), 128.3 (2C), 127.3, 127.0 (2C), 126.9 (2C), 124.2, 50.6, 48.9, 34.3, 29.5 (3C), 27.9, 25.8.

Minor isomer:

**<sup>1</sup>H NMR** (400 MHz, Chloroform-*d*)  $\delta$  = 7.60–7.53 (m, 4H), 7.46–7.31 (m, 5H), 5.85 (t,  $J$  = 7.7 Hz, 1H), 4.24 (s, 1H), 3.36 (t,  $J$  = 7.1 Hz, 2H), 2.88 (s, 3H), 2.47 (q,  $J$  = 7.2 Hz, 2H), 2.09 (s, 3H), 1.33 (s, 9H).

**<sup>13</sup>C NMR** (101 MHz, Chloroform-*d*)  $\delta$  = 157.1, 142.4, 140.8, 139.6, 136.4, 128.8 (2C), 127.2, 127.0 (2C), 126.9 (2C), 126.0 (2C), 124.7, 50.7, 48.7, 34.7, 29.6 (3C), 27.8, 15.8.

**HRMS** (ESI-TOF):  $[M+Na]^+$  calcd. for C<sub>23</sub>H<sub>30</sub>N<sub>2</sub>ONa: 373.2250, found: 373.2262.

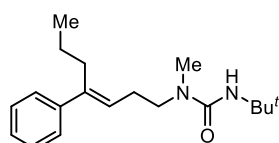

S1ai

**3-(tert-Butyl)-1-methyl-1-(4-phenylhept-3-en-1-yl)urea (S1ai)**: Prepared *via* Method B from butyrylbenzene in 22% yield as a white solid (major isomer : minor isomer = 2 : 1).

Major isomer:

**<sup>1</sup>H NMR** (400 MHz, Chloroform-*d*)  $\delta$  = 7.34–7.22 (m, 3H), 7.11 (d,  $J$  = 7.7 Hz, 2H), 5.42 (t,  $J$  = 7.4 Hz, 1H), 4.10 (s, 1H), 3.16 (t,  $J$  = 7.2 Hz, 2H), 2.68 (s, 3H), 2.30 (t,  $J$  = 7.5 Hz, 2H), 2.14 (q,  $J$  = 7.3 Hz, 2H), 1.39–1.25 (m, 2H), 1.30 (s, 9H), 0.85 (t,  $J$  = 7.4 Hz, 3H).

**<sup>13</sup>C NMR** (101 MHz, Chloroform-*d*)  $\delta$  = 157.3, 143.6, 141.0, 128.3 (2C), 128.1 (2C), 126.6, 123.3, 50.5, 48.9, 41.5, 34.2, 29.5 (3C), 27.6, 21.1, 13.6.

Minor isomer:

**<sup>1</sup>H NMR** (400 MHz, Chloroform-*d*)  $\delta$  = 7.34–7.22 (m, 5H), 5.63 (t,  $J$  = 7.5 Hz, 1H), 4.22 (s, 1H), 3.33 (t,  $J$  = 7.1 Hz, 2H), 2.88 (s, 3H), 2.48 (t,  $J$  = 7.6 Hz, 2H), 2.42 (t,  $J$  = 7.2 Hz, 2H), 1.39–1.25 (m, 2H), 1.33 (s, 9H), 0.88 (t,  $J$  = 7.3 Hz, 3H).

**<sup>13</sup>C NMR** (101 MHz, Chloroform-*d*)  $\delta$  = 157.3, 142.9, 142.1, 128.2 (2C), 126.7, 126.4 (2C), 125.3, 50.6, 49.1, 34.8, 31.7, 29.5 (3C), 27.6, 21.9, 14.0.

**HRMS** (ESI-TOF):  $[M+Na]^+$  calcd. for C<sub>19</sub>H<sub>30</sub>N<sub>2</sub>ONa: 325.2251, found: 325.2239.

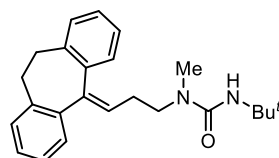

S1aj

**3-(tert-Butyl)-1-(3-(10,11-dihydro-5H-dibenzo[*a,d*][7]annulen-5-ylidene)propyl)-1-methylurea**

**(S1aj)**: Prepared *via* Method A from Nortriptyline (5 mmol, CAS: 72-69-5) in 92% yield as a white solid.

**<sup>1</sup>H NMR** (400 MHz, Chloroform-*d*)  $\delta$  = 7.29–7.26 (m, 1H), 7.21–7.10 (m, 6H), 7.04–7.02 (m, 1H), 5.85 (t,  $J$  = 7.5 Hz, 1H), 4.17 (s, 1H), 3.39–3.28 (m, 4H), 2.98–2.91 (m, 1H), 2.78–2.72 (m, 1H), 2.74 (s, 3H), 2.35 (q,  $J$  = 7.3 Hz, 2H), 1.29 (s, 9H).

**<sup>13</sup>C NMR** (101 MHz, Chloroform-*d*)  $\delta$  = 157.1, 144.6, 141.0, 139.9, 139.4, 136.9, 130.03, 128.6, 128.1, 128.1, 128.0, 127.6, 127.2, 126.1, 125.8, 50.7, 48.6, 34.4, 33.8, 32.0, 29.5 (3C), 28.3.

**HRMS** (ESI-TOF):  $[M+Na]^+$  calcd. for C<sub>24</sub>H<sub>30</sub>N<sub>2</sub>ONa: 385.2250, found: 385.2265.

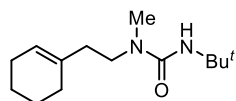

**S1ak**

**3-(*tert*-Butyl)-1-(2-(cyclohex-1-en-1-yl)ethyl)-1-methylurea (S1ak):** Prepared *via* Method A from 2-(1-cyclohexenyl)ethylamine in 63% yield as a pale-yellow solid.

**<sup>1</sup>H NMR** (400 MHz, Chloroform-*d*)  $\delta$  = 5.42 (p, *J* = 2.2 Hz, 1H), 4.21 (s, 1H), 3.26 (t, *J* = 7.3 Hz, 2H), 2.81 (s, 3H), 2.10 (t, *J* = 7.3 Hz, 2H), 1.97–1.94 (m, 4H), 1.63–1.48 (m, 4H), 1.33 (s, 9H).

**<sup>13</sup>C NMR** (101 MHz, Chloroform-*d*)  $\delta$  = 157.3, 135.3, 123.1, 50.6, 47.9, 36.4, 34.3, 29.6 (3C), 28.5, 25.3, 22.9, 22.3.

**HRMS** (ESI-TOF): [M+Na]<sup>+</sup> calcd. for C<sub>14</sub>H<sub>26</sub>N<sub>2</sub>ONa: 261.1937, found: 261.1947.

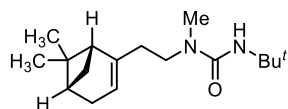

**S1al**

**3-(*tert*-Butyl)-1-(2-((1*R*,5*S*)-6,6-dimethylbicyclo[3.1.1]hept-2-en-2-yl)ethyl)-1-methylurea (S1al):** Prepared *via* Method B from (1*R*)-(-)-Nopol (CAS: 35836-73-8) in 48% yield as a white solid.

**<sup>1</sup>H NMR** (400 MHz, Chloroform-*d*)  $\delta$  = 5.25 (dt, *J* = 3.0, 1.5 Hz, 1H), 4.16 (s, 1H), 3.28–3.13 (m, 2H), 2.81 (s, 3H), 2.35 (dt, *J* = 8.5, 5.6 Hz, 1H), 2.26–2.12 (m, 4H), 2.05 (d, *J* = 5.6 Hz, 2H), 1.33 (s, 9H), 1.26 (s, 3H), 1.12 (d, *J* = 8.5 Hz, 1H), 0.81 (s, 3H).

**<sup>13</sup>C NMR** (101 MHz, Chloroform-*d*)  $\delta$  = 157.2, 145.5, 117.9, 50.6, 47.2, 45.8, 40.7, 38.0, 35.3, 34.2, 31.7, 31.3, 29.6 (3C), 26.3, 21.2.

**HRMS** (ESI-TOF): [M+Na]<sup>+</sup> calcd. for C<sub>17</sub>H<sub>30</sub>N<sub>2</sub>ONa: 301.2250, found: 301.2244.

## 2.2 Procedure for the synthesis of *N*-chloro compounds 1

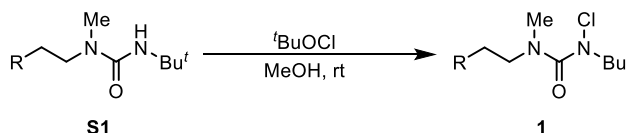

**Method C:** To a stirred solution of urea **S1** (0.5 mmol, 1.0 equiv) in MeOH (5 mL) was added *t*-BuOCl (0.55 mmol, 1.1 equiv). The reaction mixture was stirring at room temperature for 0.5 h. After that, the solvent was removed under reduced pressure at low temperature, and the residue was purified by flash column chromatography (PE / EA = 10 / 1) to provide the desired *N*-chloro compound **1**.

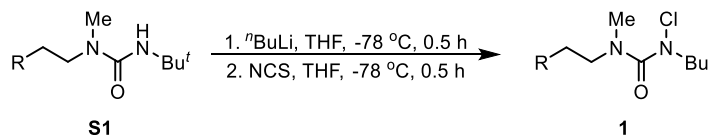

**Method D:** Synthesized according to the reference procedure.<sup>8</sup> To a 25 mL flame-dried Schlenk tube equipped with a stir bar was charged with urea **S1** (0.5 mmol, 1.0 equiv) and fitted with a rubber septum. The flask was evacuated and backfilled with N<sub>2</sub> (this process was repeated a total of three times). Then THF (3 mL) was added and the resulting solution was cooled to -78 °C. *n*-BuLi (0.33 mL, 1.6 M, 1.05 equiv) was added dropwise over a span of 5 min, and the resulting mixture was stirred for additional 30 min at -78 °C. At the same temperature, a solution of NCS (0.52 mmol, 1.05 equiv) in THF (2 mL) was then added dropwise. The mixture was stirred at -78 °C for another 30 min and allowed to warm to room

temperature. The reaction was quenched with a saturated  $\text{NH}_4\text{Cl}$  aqueous solution (15 mL) and was extracted with EtOAc ( $3 \times 10$  mL). The combined organic layers were dried over  $\text{MgSO}_4$ , filtered and concentrated under reduced pressure at low temperature. The residue was purified by flash column chromatography (PE / EA = 10 / 1) to provide the desired *N*-chloro compound **1**.

The compounds **1a**, **1b**, **1d-1n**, **1s-1w**, **1z** were synthesized according to Method C; Compounds **1c**, **1o-1r**, **1x**, **1y**, **1aa-1al** were synthesized according to Method D.

*Notice: The N-chloro compounds 1 are unstable in storage, especially under thermal conditions or in the presence of bright light, therefore are recommended to immediately use.*

### 2.3 Procedure for the synthesis of deuterated substrates

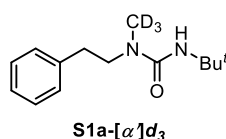

**3-(tert-Butyl)-1-(methyl-*d*<sub>3</sub>)-1-phenethylurea (S1a-[ $\alpha'$ ]d<sub>3</sub>):** Deuterated ratio over 99%, prepared *via* Method A (with  $\text{LiAlD}_4$  as the reducing agent) from phenethylamine in 54% yield as a white solid.

$^1\text{H NMR}$  (400 MHz, Chloroform-*d*)  $\delta$  = 7.32–7.28 (m, 2H), 7.24–7.18 (m, 3H), 3.85 (s, 1H), 3.42 (t,  $J$  = 7.1 Hz, 2H), 2.81 (t,  $J$  = 7.0 Hz, 2H), 1.22 (s, 9H).

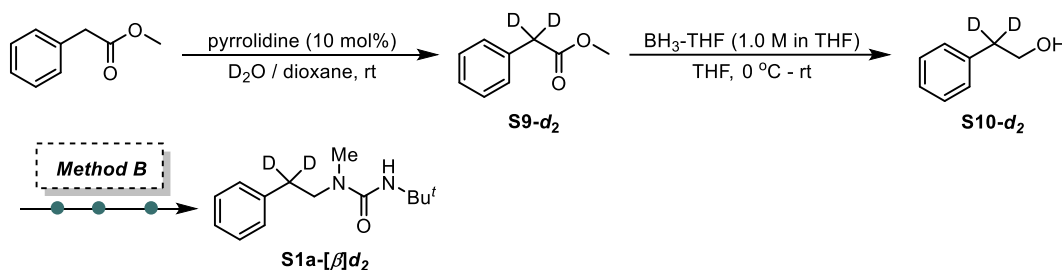

The **S9-*d*<sub>2</sub>** was synthesized according to the reference procedure.<sup>5</sup> To a stirred solution of methyl phenylacetate (10 mmol, 1.0 equiv) in  $\text{D}_2\text{O}$  (6 mL) and anhydrous dioxane (6 mL) was added pyrrolidine (1 mmol, 10 mol%). The reaction mixture was stirred at room temperature for 36 h, followed by water (10 mL) and then extracted with DCM ( $2 \times 15$  mL). The organic layer was washed with water (15 mL) and brine (15 mL), dried over  $\text{MgSO}_4$ , and filtered. The filtrate was concentrated to afford **S9-*d*<sub>2</sub>**, which was used without any purification in the next step.

The **S9-*d*<sub>2</sub>** (10 mmol, 1.0 equiv) was dissolved in dry THF (15 mL) in a 100 mL flame-dried Schlenk tube under  $\text{N}_2$  atmosphere. The solution was cooled to 0 °C and  $\text{BH}_3\text{-THF}$  (15 mL, 1.0 M in THF, 1.5 equiv,) was added dropwise. The mixture was allowed to warm to room temperature and stirred overnight. After completed, the EtOAc (30 mL) was added carefully to quench the reaction, and the mixture was washed with water ( $3 \times 30$  mL). Then the collected aqueous phase was extracted with EtOAc (30 mL) for twice. The combined organic phases were dried over  $\text{MgSO}_4$ , filtered and concentrated under reduced pressure. The residue was purified by flash column chromatography (PE / EA = 5 / 1) to provide the **S10-*d*<sub>2</sub>**. The **S10-*d*<sub>2</sub>** could be used to synthesize compound **S1a-[ $\beta$ ]d<sub>2</sub>** under Method B.

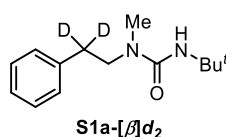

**3-(tert-Butyl)-1-methyl-1-(2-phenylethyl)-2,2-*d*<sub>2</sub>urea (S1a-[ $\beta$ ]d<sub>2</sub>):** Deuterated ratio over 99%,

prepared from methyl phenylacetate (10 mmol) in 35% yield as a white solid.

$^1\text{H NMR}$  (400 MHz, Chloroform-*d*)  $\delta$  = 7.34–7.27 (m, 2H), 7.25–7.16 (m, 3H), 3.86 (s, 1H), 3.42 (s, 2H), 2.80 (s, 3H), 1.22 (s, 9H).

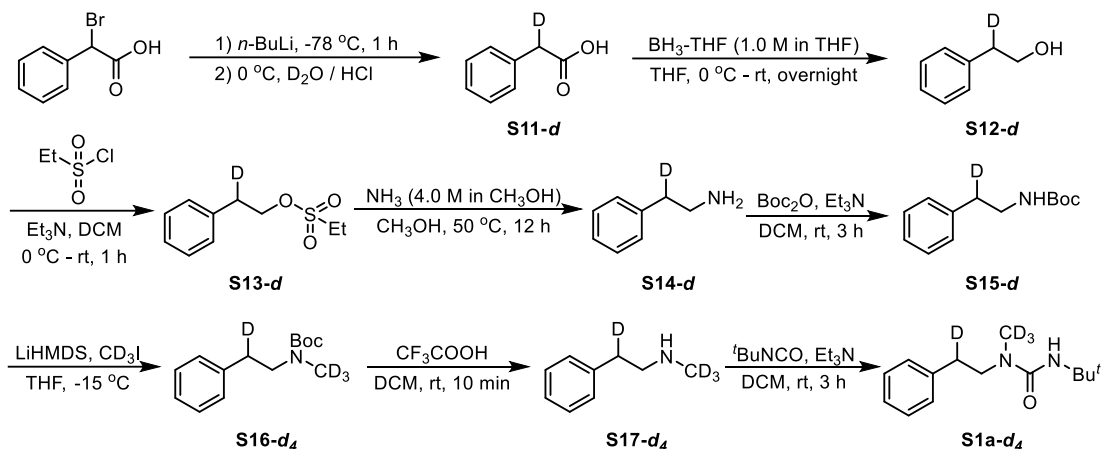

The **S11-d** was synthesized according to the reference procedure.<sup>6</sup> To a stirred solution of 2-bromo-2-phenylacetic acid (20 mmol, 1.0 equiv) in dry THF (50 mL) at  $-78\text{ }^\circ\text{C}$  under  $\text{N}_2$  atmosphere was added *n*-BuLi (41 mmol, 25.6 mL, 1.6 M in hexane) dropwise. The reaction mixture was left stirred for 1 h at  $-78\text{ }^\circ\text{C}$ , and was then gradually brought to  $0\text{ }^\circ\text{C}$ , followed by quenching with  $\text{D}_2\text{O}$  (2 mL). The reaction mixture was acidified with 6N HCl and extracted with diethyl ether ( $3 \times 30\text{ mL}$ ). The combined organic layers were washed with brine, dried over  $\text{MgSO}_4$ , filtered and evaporated under reduced pressure to provide **S11-d**, which was used without any purification in the next step.

The **S11-d** (18 mmol, 1.0 equiv) was dissolved in dry THF (20 mL) in a 100 mL flame-dried Schlenk tube under  $\text{N}_2$  atmosphere. The solution was cooled to  $0\text{ }^\circ\text{C}$  and  $\text{BH}_3\text{-THF}$  (27 mL, 1.0 M in THF, 1.5 equiv,) was added dropwise. The mixture was allowed to warm to room temperature and stirred overnight. After completed, the EtOAc (30 mL) was added carefully to quench the reaction, and the mixture was washed with water ( $3 \times 30\text{ mL}$ ). Then the collected aqueous phase was extracted with EtOAc (30 mL) for twice. The combined organic phases were dried over  $\text{MgSO}_4$ , filtered and concentrated under reduced pressure. The residue was purified by flash column chromatography (PE / EA = 5 / 1) to provide the **S12-d**.

To a stirred solution of **S12-d** (17 mmol, 1.0 equiv) in DCM (50 mL) was dropwise added  $\text{EtSO}_2\text{Cl}$  (20.4 mmol, 1.2 equiv) and  $\text{Et}_3\text{N}$  (20.4 mmol, 1.2 equiv) at  $0\text{ }^\circ\text{C}$ . The reaction was allowed to warm to room temperature and stirred for 1 h. After completed, the solvent was removed under reduced pressure, and the residue was purified by flash column chromatography (PE / EA = 10 / 1) to provide **S13-d**.

To a stirred solution of **S13-d** (15 mmol) in MeOH (4 mL) was added  $\text{NH}_3$  (15 mL, 4.0 M in  $\text{CH}_3\text{OH}$ , 4 equiv) and the mixture was stirred at  $50\text{ }^\circ\text{C}$  for 12 h. After completed, the mixture was cooled to room temperature and concentrated under reduced pressure to provide the **S14-d**, which was used without any purification in the next step.

To a stirred solution of **S14-d** (10 mmol, 1.0 equiv) in DCM (15 mL) was dropwise added  $\text{Boc}_2\text{O}$  (12 mmol, 1.2 equiv) and  $\text{Et}_3\text{N}$  (12 mmol, 1.2 equiv). The mixture was stirred at room temperature for 3 h, then the solvent was removed under reduced pressure. The residue was purified by flash column chromatography (PE / EA = 20 / 1) to provide **S15-d**.

To a cooled solution of **S15-d** (6.5 mmol,) in THF (20 mL) at  $-15\text{ }^\circ\text{C}$  was added LiHMDS (7.8 mL, 1.0 M in THF, 1.2 equiv) under  $\text{N}_2$  atmosphere. After stirring at  $-15\text{ }^\circ\text{C}$  for 15 min,  $\text{CD}_3\text{I}$  (7.8 mmol, 1.2 equiv) was added dropwise to the above solution. The solution was then slowly warmed to room

temperature. After 1 h, the reaction was diluted with EtOAc (30 mL) and quenched with water (20 mL). After removing the organic phase, the aqueous phase was extracted again with EtOAc twice ( $2 \times 30$  mL). The combined organic extract was washed with brine, dried over  $\text{MgSO}_4$ , filtered and concentrated in vacuo. The residue was purified by flash column chromatography (PE / EA = 20 / 1) to provide the **S16-d<sub>4</sub>**.

To a stirred solution of **S16-d<sub>4</sub>** in DCM (10 mL) was dropwise added  $\text{CF}_3\text{COOH}$  (10 mL) at room temperature. The reaction was then stirred for 10 minutes and the solvent was removed under reduced pressure. To the residue was added NaOH solution (1 N, 10 mL), and the aqueous phase was extracted with DCM ( $3 \times 10$  mL). The combined organic phase was dried over  $\text{MgSO}_4$ , filtered and concentrated under reduced pressure to provide the **S17-d<sub>4</sub>**, which was used without any purification in the next step. To a stirred solution of **S17-d<sub>4</sub>** (5 mmol, 1.0 equiv) in DCM (20 mL) was dropwise added  $t\text{BuNCO}$  (6 mmol, 1.2 equiv) and  $\text{Et}_3\text{N}$  (6 mmol, 1.2 equiv). After stirring for 3 h, the solvent was removed under reduced pressure and the residue was purified by flash column chromatography (PE / EA = 3 / 1) to provide **S1a-d<sub>4</sub>**.

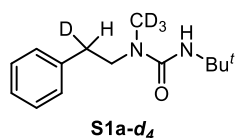

**3-(tert-Butyl)-1-(methyl-d<sub>3</sub>)-1-(2-phenylethyl-2-d)urea (S1a-d<sub>4</sub>):** Deuterated ratio over 99%, prepared from methyl phenylacetate 2-bromo-2-phenylacetic acid (20 mmol) in 22% yield as a white solid.

**<sup>1</sup>H NMR** (400 MHz, Chloroform-*d*)  $\delta$  = 7.32–7.28 (m, 2H), 7.24–7.18 (m, 3H), 3.85 (s, 1H), 3.42 (d,  $J$  = 6.9 Hz, 2H), 2.79 (t,  $J$  = 7.0 Hz, 1H), 1.22 (s, 9H).

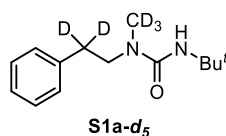

**3-(tert-Butyl)-1-(methyl-d<sub>3</sub>)-1-(2-phenylethyl-2,2-d<sub>2</sub>)urea (S1a-d<sub>5</sub>):** Deuterated ratio over 99%, prepared from **S10-d<sub>2</sub>** (12 mmol) in 23% yield as a white solid.

**<sup>1</sup>H NMR** (400 MHz, Chloroform-*d*)  $\delta$  = 7.31–7.28 (m, 2H), 7.24–7.18 (m, 3H), 3.94 (s, 1H), 3.41 (s, 2H), 1.22 (s, 9H).

## 2.4 Procedure for the synthesis of new developed chiral ligands

### A. Chiral bisoxazoline ligands:

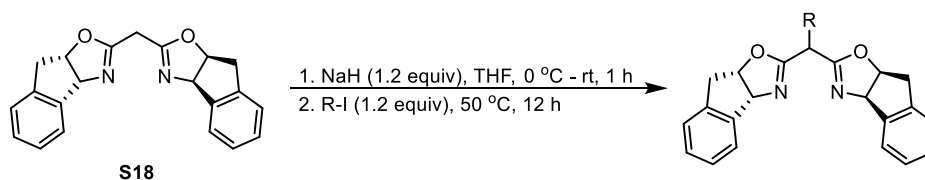

The **S18**<sup>7</sup> (1 mmol, 1.0 equiv) was dissolved in dry THF (5 mL) in a flame-dried Schlenk tube. The solution was cooled to 0 °C and NaH (48 mg, 60% wt in oil, 1.2 equiv) was added in portions. The resulting mixture was allowed to warm to room temperature and stirred for 1 h, then a solution of iodoalkane (1.2 mmol, 1.2 equiv) in THF (2 mL) was added dropwise. After stirring at 50 °C for 12 h, sat.  $\text{NH}_4\text{Cl}$  solution (5 mL) and water (15 mL) were added and the mixture was extracted with DCM ( $3 \times 20$  mL). The combined organic phases were dried over  $\text{MgSO}_4$ , filtered and concentrated under reduced

pressure. The residue was purified by flash column chromatography (PE / EA = 3 / 1) to provide the desired ligands **L21-L24**.

Selected analytical data of chiral bisoxazoline ligands:

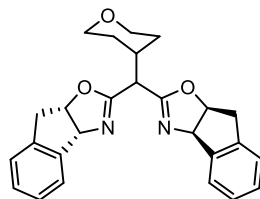

**L21**

**(3aR,3a'R,8aS,8a'S)-2,2'-((Tetrahydro-2H-pyran-4-yl)methylene)bis(3a,8a-dihydro-8H-indeno[1,2-d]oxazole) (L21):** Prepared from **S18** (0.5 mmol) in 46% yield as a white solid.

**<sup>1</sup>H NMR** (400 MHz, Chloroform-*d*)  $\delta$  = 7.49–7.45 (m, 2H), 7.28–7.20 (m, 6H), 5.56–5.52 (m, 2H), 5.31–5.25 (m, 2H), 3.82 (t, *J* = 12.5 Hz, 2H), 3.37–3.29 (m, 4H), 3.18 (d, *J* = 10.0 Hz, 1H), 2.99 (t, *J* = 17.7 Hz, 2H), 2.27 (q, *J* = 11.3 Hz, 1H), 1.48 (d, *J* = 12.7 Hz, 1H), 1.37 (d, *J* = 12.4 Hz, 1H), 1.28–1.15 (m, 2H).

**<sup>13</sup>C NMR** (101 MHz, Chloroform-*d*)  $\delta$  = 163.7, 163.6, 141.8, 141.6, 139.5, 139.3, 128.4 (2C), 127.4, 127.4, 125.5, 125.5, 125.2, 125.1, 83.3, 83.1, 76.4, 76.3, 67.5 (2C), 45.3, 39.6, 39.5, 35.4, 30.6, 30.5.

**HRMS** (ESI-TOF): [M+Na]<sup>+</sup> calcd. for C<sub>26</sub>H<sub>26</sub>N<sub>2</sub>O<sub>3</sub>Na: 437.1836, found: 437.1825.

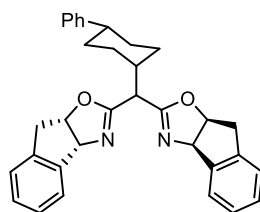

**L22**

**(3aR,3a'R,8aS,8a'S)-2,2'-(((1S,4R)-4-Phenylcyclohexyl)methylene)bis(3a,8a-dihydro-8H-indeno[1,2-d]oxazole) (L22):** Prepared from **S18** (0.5 mmol) in 62% yield as a white solid.

**<sup>1</sup>H NMR** (400 MHz, Chloroform-*d*)  $\delta$  = 7.49–7.45 (m, 2H), 7.27–7.12 (m, 11H), 5.53 (dd, *J* = 7.6, 4.6 Hz, 2H), 5.28 (t, *J* = 8.0 Hz, 2H), 3.31 (dt, *J* = 15.8, 7.7 Hz, 2H), 3.17 (d, *J* = 9.9 Hz, 1H), 2.97 (dd, *J* = 26.4, 17.9 Hz, 2H), 2.33 (t, *J* = 12.1 Hz, 1H), 2.09 (q, *J* = 11.7 Hz, 1H), 1.80–1.62 (m, 4H), 1.41 (q, *J* = 12.1 Hz, 2H), 1.11–0.93 (m, 2H).

**<sup>13</sup>C NMR** (101 MHz, Chloroform-*d*)  $\delta$  = 164.3, 164.3, 147.2, 141.9, 141.7, 139.6, 139.5, 128.3 (2C), 128.3 (2C), 127.4, 127.4, 126.8 (2C), 125.9, 125.5, 125.5, 125.1, 125.1, 83.1, 83.1, 76.4, 76.3, 45.8, 44.0, 39.7, 39.6, 37.8, 33.7, 33.6, 30.9, 30.8.

**HRMS** (ESI-TOF): [M+Na]<sup>+</sup> calcd. for C<sub>33</sub>H<sub>32</sub>N<sub>2</sub>O<sub>2</sub>Na: 511.2356, found: 511.2368.

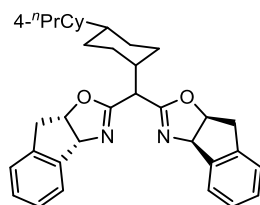

**L23**

**(3aR,3a'R,8aS,8a'S)-2,2'-(((1R,4S)-4'-Propyl-[1,1'-bi(cyclohexan)]-4-yl)methylene)bis(3a,8a-dihydro-8H-indeno[1,2-d]oxazole) (L23):** Prepared from **S18** (0.5 mmol) in 69% yield as a white solid.

**<sup>1</sup>H NMR** (400 MHz, Chloroform-*d*)  $\delta$  = 7.47–7.43 (m, 2H), 7.26–7.17 (m, 6H), 5.50 (dd, *J* = 7.5, 5.3 Hz, 2H), 5.25 (t, *J* = 8.3 Hz, 2H), 3.29 (dt, *J* = 16.3, 7.8 Hz, 2H), 3.09 (d, *J* = 10.0 Hz, 1H), 2.95 (dd, *J* =

25.4, 18.0 Hz, 2H), 1.92 (q,  $J = 10.8$  Hz, 1H), 1.75–1.49 (m, 9H), 1.33–1.23 (m, 2H), 1.12–1.09 (m, 3H), 0.90–0.75 (m, 12H).

$^{13}\text{C}$  NMR (101 MHz, Chloroform- $d$ )  $\delta = 164.4, 164.4, 141.9, 141.8, 139.6, 139.5, 128.3$  (2C), 127.3, 127.3, 125.5, 125.5, 125.1 (2C), 83.0, 83.0, 76.4, 76.3, 46.0, 43.2, 42.8, 39.8, 39.7, 39.6, 38.3, 37.6, 33.6 (2C), 30.9, 30.9, 30.0, 29.9, 29.5, 29.4, 20.0, 14.4.

HRMS (ESI-TOF):  $[\text{M}+\text{Na}]^+$  calcd. for  $\text{C}_{36}\text{H}_{44}\text{N}_2\text{ONa}$ : 559.3295, found: 559.3279.

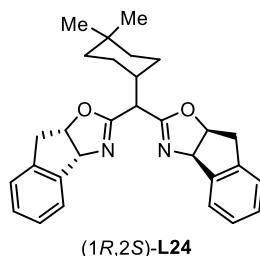

**(3aR,3a'R,8aS,8a'S)-2,2'-((4,4-Dimethylcyclohexyl)methylene)bis(3a,8a-dihydro-8H-indeno[1,2-d]oxazole** ((1R,2S)-L24): Prepared from S18 (1 mmol) in 75% yield as a white solid.

$^1\text{H}$  NMR (400 MHz, Chloroform- $d$ )  $\delta = 7.47\text{--}7.43$  (m, 2H), 7.26–7.17 (m, 6H), 5.51 (t,  $J = 7.6$  Hz, 2H), 5.26 (qd,  $J = 6.9, 1.7$  Hz, 2H), 3.31 (dt,  $J = 17.8, 7.5$  Hz, 2H), 3.18 (d,  $J = 9.6$  Hz, 1H), 2.99 (dd,  $J = 24.5, 17.9$  Hz, 2H), 1.36–0.92 (m, 9H), 0.80 (s, 3H), 0.68 (s, 3H).

$^{13}\text{C}$  NMR (101 MHz, Chloroform- $d$ )  $\delta = 164.4, 164.4, 141.9, 141.8, 139.6, 139.5, 128.3$  (2C), 127.4, 127.3, 125.5, 125.4, 125.1 (2C), 83.1, 83.0, 76.4, 76.2, 45.5, 39.7, 39.6, 38.6, 38.5, 38.0, 32.5, 29.7, 26.3, 26.2, 24.2.

HRMS (ESI-TOF):  $[\text{M}+\text{Na}]^+$  calcd. for  $\text{C}_{29}\text{H}_{32}\text{N}_2\text{ONa}$ : 463.2356, found: 463.2371.

## B. Chiral diamine ligands:

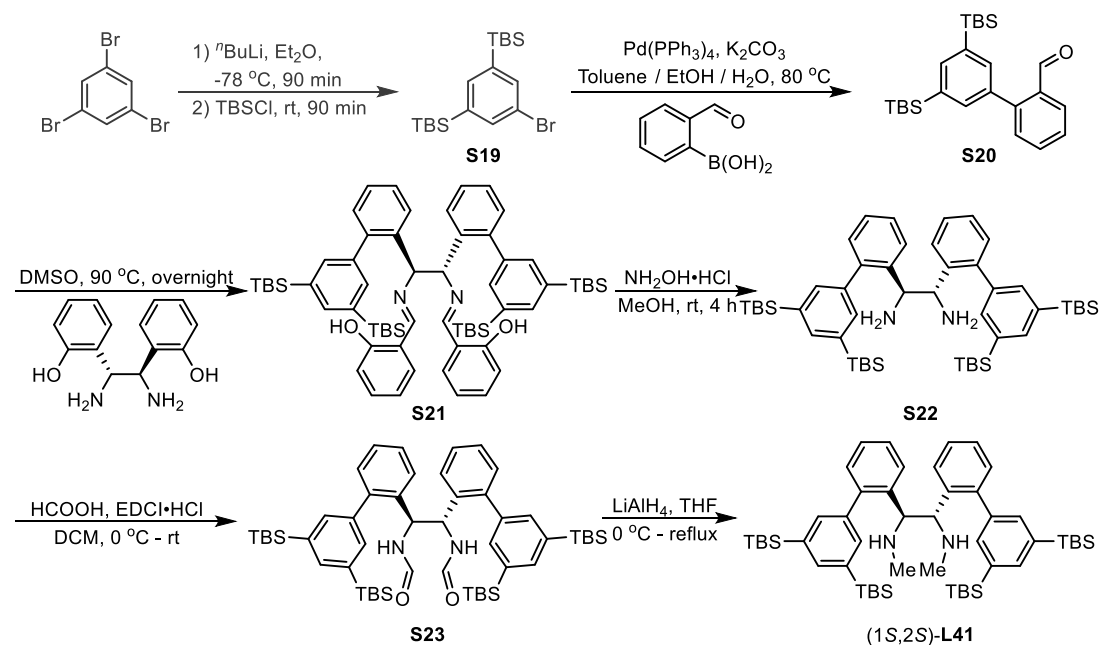

To a stirred solution of 1,3,5-tribromobenzene (20 mmol, 1.0 equiv) in  $\text{Et}_2\text{O}$  (125 mL) at  $-78^\circ\text{C}$  was added  $n\text{-BuLi}$  (25.6 mL, 1.6 M in hexane, 2.05 equiv) dropwise under  $\text{N}_2$  atmosphere. The solution was stirred for 90 min before adding trihexylsilylchloride (44 mmol, 2.2 equiv) dropwise *via* a syringe. The solution was allowed to warm to room temperature. After stirring for another 90 min, the reaction mixture was washed with water, dried over  $\text{MgSO}_4$  and filtered. The solution was concentrated and purified by



flash column chromatography (PE) to provide **S19** (mixed with a small amount of 1,3,5-tris(*tert*-butyldimethylsilyl)benzene and (3-bromophenyl)(*tert*-butyl)dimethylsilane).

The **S19** (17 mmol, 1.0 equiv), (2-formylphenyl)boronic acid (20.4 mmol, 1.2 equiv), K<sub>2</sub>CO<sub>3</sub> (61.2 mmol, 3.6 equiv) and Pd(PPh<sub>3</sub>)<sub>4</sub> (0.51 mmol, 0.03 equiv) were dissolved in a degassed toluene/EtOH/H<sub>2</sub>O mixture (10:6:3, 50 mL). The solution was heated to 80 °C under vigorous stirring for 1 day, then cooled to rt, treated with H<sub>2</sub>O (20 mL) and separated. The aqueous phase was extracted with CH<sub>2</sub>Cl<sub>2</sub> (3×20 mL), and the organic phases were combined, washed with H<sub>2</sub>O (2 × 20 mL), dried over MgSO<sub>4</sub>, filtered and concentrated under reduced pressure. The residue was purified by flash column chromatography (PE / EA = 20 / 1) to provide **S20**.

The **S20** (2.4 mmol, 2.4 equiv) and (*R,R*)-Mother diamine (1 mmol, 1.0 equiv) were dissolved in anhydrous DMSO (6 mL) and stirred at 90 °C under N<sub>2</sub> atmosphere overnight. After completed, the mixture was poured into water. The aqueous layer was extracted with Et<sub>2</sub>O (3 × 20 mL). The combined organic layer was washed with water and dried over MgSO<sub>4</sub>. After evaporation of the solvent, the residue (crude **S21**, 1 mmol, 1.0 equiv) was dissolved in MeOH (15 mL) and NH<sub>2</sub>OH·HCl (5 mmol, 5.0 equiv) was added. The mixture was stirred at rt for 4 h. NaOH (20 mL, 2 M) was added to the reaction mixture and the aqueous layer was extracted with CH<sub>2</sub>Cl<sub>2</sub> (5 × 15 mL), dried over MgSO<sub>4</sub>, filtered, and concentrated under reduced pressure. The crude diamine **S22** was purified by flash column chromatography (PE / EA = 3 / 1 to 1 / 1).

To a stirred solution of **S22** (0.74 mmol, 1.0 equiv) in CH<sub>2</sub>Cl<sub>2</sub> (10 mL) at 0 °C was added formic acid (4.44 mmol, 6.00 equiv) dropwise, and then EDCI·HCl (2.22 mmol, 3.00 equiv) was added portionwise over 2 min. Next, the mixture was allowed to warm to room temperature and stirred for 30 min. The reaction mixture was added water (15 mL), separated, and the aqueous was extracted with CH<sub>2</sub>Cl<sub>2</sub> (3 × 15 mL). The combined organic layers were washed with an aqueous solution of HCl (25 mL, 1.0 M) and then water (20 mL), dried over MgSO<sub>4</sub>, and concentrated. The residue was purified by flash column chromatography (PE / EA = 5 / 1 to 3 / 1) to provide **S23**.

To a stirred solution of **S23** (0.65 mmol, 1.0 equiv) in anhydrous THF (4 mL) under N<sub>2</sub> at 0 °C was added LiAlH<sub>4</sub> (powder; 3.9 mmol, 6.0 equiv) in ~10 portions over 5 min. The mixture was heated at reflux for 2 h. After completed, the reaction mixture was allowed to cool to 0 °C in an ice–water bath. The excess LiAlH<sub>4</sub> was quenched by the very careful addition of EtOAc (0.5 mL), then solvent was removed under reduced pressure and DCM (10 mL) was added. The insoluble substance was filtered, washed with DCM (3 × 10 mL) and the collected solvent was concentrated under reduced pressure. The residue was purified by flash column chromatography (PE / EA = 3 / 1) to provide the desired ligands **L35-L41**.

Selected analytical data of chiral diamine ligands:

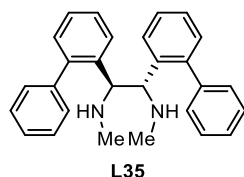

**(1S,2S)-1,2-Di([1,1'-biphenyl]-2-yl)-N',N'-dimethylethane-1,2-diamine (L35):** Prepared from bromobenzene and (*R,R*)-Mother diamine in 58% yield as a white solid.

**<sup>1</sup>H NMR** (400 MHz, Chloroform-*d*)  $\delta$  = 7.31–7.23 (m, 7H), 7.17 (t, *J* = 7.4 Hz, 2H), 7.09 (t, *J* = 7.5 Hz, 2H), 6.99–6.93 (m, 7H), 3.81 (s, 2H), 2.28 (s, 6H), 2.13 (s, 2H).

**<sup>13</sup>C NMR** (101 MHz, Chloroform-*d*)  $\delta$  = 143.2, 141.3, 138.5, 129.8, 129.6, 127.8, 127.6, 127.5, 126.5, 126.1, 65.3, 34.2.

**HRMS** (ESI-TOF):  $[M+Na]^+$  calcd. for  $C_{28}H_{29}N_2$ : 393.2325, found: 393.2337.

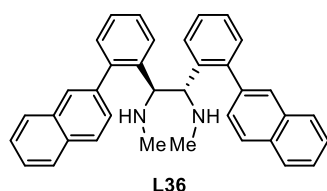

**L36**

**(1S,2S)-*N*<sup>1</sup>,*N*<sup>2</sup>-Dimethyl-1,2-bis(2-(naphthalen-2-yl)phenyl)ethane-1,2-diamine (L36):** Prepared from 2-bromonaphthalene and (*R,R*)-Mother diamine in 52% yield as a white solid.

**<sup>1</sup>H NMR** (400 MHz, Chloroform-*d*)  $\delta$  = 7.88–7.86 (m, 2H), 7.74–7.68 (m, 4H), 7.53–7.48 (m, 5H), 7.20 (t,  $J$  = 7.8 Hz, 2H), 7.04–6.88 (m, 9H), 3.84 (s, 2H), 2.28 (s, 6H), 2.11 (s, 2H).

**<sup>13</sup>C NMR** (101 MHz, Chloroform-*d*)  $\delta$  = 143.1, 138.8, 138.6, 132.9, 132.1, 129.8, 128.5, 128.1, 127.8, 127.7, 127.63, 126.9, 126.2, 126.0, 125.7, 62.7, 34.3.

**HRMS** (ESI-TOF):  $[M+Na]^+$  calcd. for  $C_{36}H_{33}N_2$ : 493.2638, found: 493.2651.

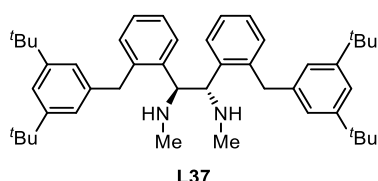

**L37**

**(1S,2S)-1,2-Bis(2-(3,5-di-*tert*-butylbenzyl)phenyl)-*N*<sup>1</sup>,*N*<sup>2</sup>-dimethylethane-1,2-diamine (L37):** Prepared from 1-(bromomethyl)-3,5-di-*tert*-butylbenzene and (*R,R*)-Mother diamine in 43% yield as a colorless liquid.

**<sup>1</sup>H NMR** (400 MHz, Chloroform-*d*)  $\delta$  = 7.70 (d,  $J$  = 7.7 Hz, 2H), 7.30 (t,  $J$  = 7.5 Hz, 2H), 7.21 (s, 2H), 7.16 (t,  $J$  = 7.5 Hz, 2H), 6.80 (d,  $J$  = 7.6 Hz, 2H), 6.72 (s, 4H), 3.97 (s, 2H), 3.42 (d,  $J$  = 15.9 Hz, 2H), 3.24 (d,  $J$  = 15.9 Hz, 2H), 2.99 (s, 2H), 1.96 (s, 6H), 1.26 (s, 36H).

**<sup>13</sup>C NMR** (101 MHz, Chloroform-*d*)  $\delta$  = 150.6, 140.7, 139.7, 139.5, 129.9, 127.2, 127.1, 126.4, 123.5, 119.8, 65.3, 38.5, 34.7, 34.1, 31.5.

**HRMS** (ESI-TOF):  $[M+Na]^+$  calcd. for  $C_{46}H_{65}N_2$ : 645.5142, found: 645.5130.

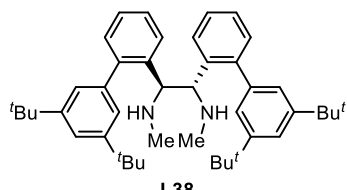

**L38**

**(1S,2S)-1,2-Bis(3',5'-di-*tert*-butyl-[1,1'-biphenyl]-2-yl)-*N*<sup>1</sup>,*N*<sup>2</sup>-dimethylethane-1,2-diamine (L38):** Prepared from 1-bromo-3,5-di-*tert*-butylbenzene and (*R,R*)-Mother diamine in 52% yield as a white solid.

**<sup>1</sup>H NMR** (400 MHz, Chloroform-*d*)  $\delta$  = 7.40 (s, 2H), 7.15–7.09 (m, 4H), 7.00–6.89 (m, 8H), 4.00 (s, 2H), 2.31 (s, 6H), 2.22 (s, 2H), 1.37 (s, 36H).

**<sup>13</sup>C NMR** (101 MHz, Chloroform-*d*)  $\delta$  = 149.8, 143.9, 140.8, 138.2, 130.3, 127.7, 127.1, 126.1, 124.1, 120.8, 64.8, 34.9, 34.3, 31.7.

**HRMS** (ESI-TOF):  $[M+Na]^+$  calcd. for  $C_{44}H_{61}N_2$ : 617.4829, found: 617.4842.

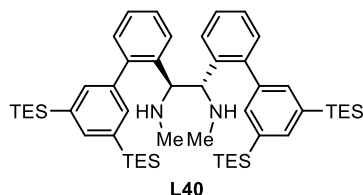

**L40**

**(1*S*,2*S*)-1,2-Bis(3',5'-bis(triethylsilyl)-[1,1'-biphenyl]-2-yl)-*N*<sup>1</sup>,*N*<sup>2</sup>-dimethylethane-1,2-diamine**

**(L40)**: Prepared from 1,3,5-tribromobenzene and (*R,R*)-Mother diamine in 59% yield as a white solid.

<sup>1</sup>H NMR (400 MHz, Chloroform-*d*)  $\delta$  = 7.58 (s, 2H), 7.13–6.99. (m, 7H), 6.96–6.88 (m, 5H), 4.06 (s, 2H), 2.31 (s, 6H), 2.14 (s, 2H), 1.03 (t, *J* = 7.7 Hz, 36H), 0.87–0.82 (m, 24H).

<sup>13</sup>C NMR (101 MHz, Chloroform-*d*)  $\delta$  = 143.6, 139.9, 138.7, 138.1, 136.0, 135.3, 130.3, 127.4, 127.2, 126.2, 64.0, 34.1, 7.6, 3.5.

**HRMS** (ESI-TOF): [M+Na]<sup>+</sup> calcd. for C<sub>52</sub>H<sub>84</sub>N<sub>2</sub>Si<sub>4</sub>Na: 849.5784, found: 849.5796.

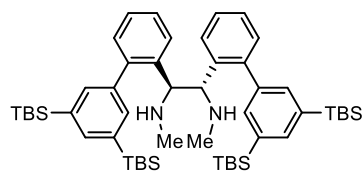

(1*S*,2*S*)-L41

**(1*S*,2*S*)-1,2-Bis(3',5'-bis(*tert*-butyldimethylsilyl)-[1,1'-biphenyl]-2-yl)-*N*<sup>1</sup>,*N*<sup>2</sup>-dimethylethane-1,2-**

**diamine ((1*S*,2*S*)-L41)**: Prepared from 1,3,5-tribromobenzene and (*R,R*)-Mother diamine in 62% yield as a white solid.

<sup>1</sup>H NMR (400 MHz, Chloroform-*d*)  $\delta$  = 7.60 (s, 2H), 7.12 (t, *J* = 7.2 Hz, 4H), 7.03–6.93 (m, 8H), 5.41 (s, 2H), 4.40–4.36 (m, 2H), 2.35–2.44 (m, 6H), 0.89 (s, 36H), 0.32–0.30 (m, 24H).

<sup>13</sup>C NMR (101 MHz, Chloroform-*d*)  $\delta$  = 143.5, 139.3, 138.7, 135.8, 135.3, 130.8, 127.7, 127.4, 127.3, 127.3, 63.0, 33.0, 26.6, 17.0, -6.0.

**HRMS** (ESI-TOF): [M+Na]<sup>+</sup> calcd. for C<sub>52</sub>H<sub>85</sub>N<sub>2</sub>Si<sub>4</sub>: 849.5784, found: 849.5792.

### 3. Optimization of the Reaction Conditions

**Table S1.** Preliminary screening of ligands for regioselective cyanation of  $\alpha'/\beta$ -C(sp<sup>3</sup>)-H

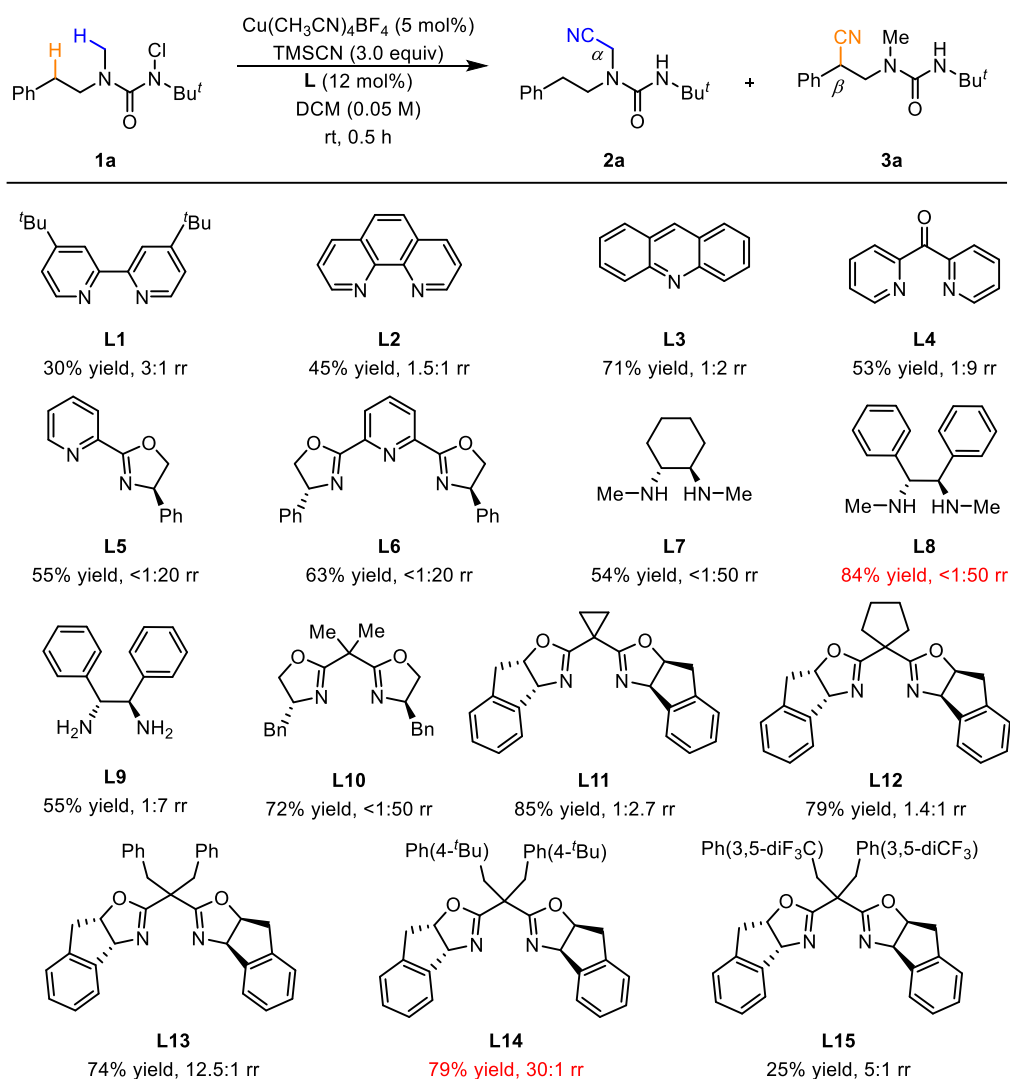

Reaction conditions: **1a** (0.1 mmol),  $\text{Cu}(\text{CH}_3\text{CN})_4\text{BF}_4$  (5 mol%), L (12 mol%), TMSCN (3.0 equiv), DCM (2 mL),  $\text{N}_2$ , rt, 0.5 h. The yields (**2a+3a**) and regioselectivity ratio (rr, **2a/3a**) were determined by GC-MS using dodecane as internal standard.

**Table S2.** Screening other conditions for selective cyanation of  $\alpha'$ -C(sp<sup>3</sup>)-H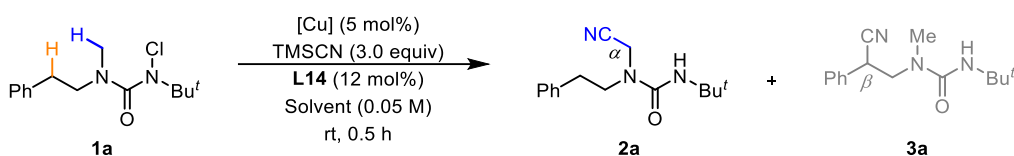

| Entry           | Catalyst                                              | Solvent            | Yield of <b>2a</b> (%)       | rr ( <b>2a/3a</b> ) |
|-----------------|-------------------------------------------------------|--------------------|------------------------------|---------------------|
| 1               | CuSCN                                                 | DCM                | 67%                          | 20:1                |
| 2               | CuSCN                                                 | DCE                | 65%                          | 30:1                |
| 3               | CuSCN                                                 | CH <sub>3</sub> CN | 10%                          | 10:1                |
| 4               | CuSCN (3 mol%)                                        | DCM                | 35%                          | 15:1                |
| 5 <sup>a</sup>  | CuSCN (3 mol%)                                        | DCM                | 50%                          | 10:1                |
| 6               | CuSCN                                                 | DCM (1 mL)         | 65%                          | 10:1                |
| 7               | CuI                                                   | DCM                | 30%                          | 1.5:1               |
| 8               | Cu(OTf) <sub>2</sub>                                  | DCM                | 25%                          | 5:1                 |
| <b>9</b>        | <b>Cu(CH<sub>3</sub>CN)<sub>4</sub>BF<sub>4</sub></b> | <b>DCM</b>         | <b>76% (69%)<sup>b</sup></b> | <b>30:1</b>         |
| 10 <sup>c</sup> | Cu(CH <sub>3</sub> CN) <sub>4</sub> BF <sub>4</sub>   | DCM                | 43%                          | 12:1                |

Reaction conditions: **1a** (0.1 mmol), [Cu] (5 mol%), **L14** (12 mol%), TMSCN (3.0 equiv), solvent (2 mL), N<sub>2</sub>, rt, 0.5 h. The yields and regioselectivity ratio (rr) were determined by GC-MS using dodecane as internal standard. <sup>a</sup>**L14** (7.5 mol%). <sup>b</sup>Isolated yield of **2a** was in parentheses. <sup>c</sup>Racemic **L14** was used.

**Table S3.** Screening other conditions for enantioselective cyanation of  $\beta$ -C(sp<sup>3</sup>)-H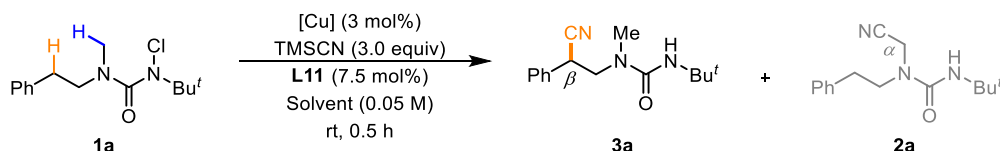

| Entry    | Catalyst                                            | Solvent                 | Yield of <b>3a</b> (%) | Er of <b>3a</b> | rr ( <b>2a/3a</b> ) |
|----------|-----------------------------------------------------|-------------------------|------------------------|-----------------|---------------------|
| 1        | Cu(CH <sub>3</sub> CN) <sub>4</sub> BF <sub>4</sub> | DCM                     | 62%                    | 82.5:17.5       | 1:2.7               |
| 2        | CuI                                                 | DCM                     | 72%                    | 86.5:13.5       | 1:2.9               |
| 3        | Cu(OTf) <sub>2</sub>                                | DCM                     | 64%                    | 90:10           | 1:2.9               |
| 4        | CuOAc                                               | DCM                     | 25%                    | 85.5:14.5       | 2.7:1               |
| 5        | CuTc                                                | DCM                     | 51%                    | 89:11           | 1:7.3               |
| 6        | CuSCN                                               | DCM                     | 67%                    | 90.5:9.5        | 1:2.7               |
| <b>7</b> | <b>CuSCN</b>                                        | <b>CH<sub>3</sub>CN</b> | <b>75%</b>             | <b>91.5:8.5</b> | <b>1:15</b>         |
| 8        | CuSCN                                               | THF                     | 32%                    | 82:18           | 1:9                 |
| 9        | CuSCN                                               | PhCF <sub>3</sub>       | 45%                    | 91:9            | 1:2.5               |
| 10       | CuSCN                                               | dioxane                 | 15%                    | 85:15           | 1:13                |
| 11       | CuSCN                                               | DMA                     | /                      | /               | /                   |

Reaction conditions: **1a** (0.1 mmol), [Cu] (3 mol%), **L11** (7.5 mol%), TMSCN (3.0 equiv), solvent (2 mL), N<sub>2</sub>, rt, 0.5 h. The yields and regioselectivity ratio (rr, **2a/3a**) were determined by GC-MS using dodecane as internal standard. Enantiomeric ratio (er) values detected by HPLC on a chiral stationary phase.

**Table S4.** Screening chiral ligands for enantioselective cyanation of  $\beta$ -C(sp<sup>3</sup>)-H

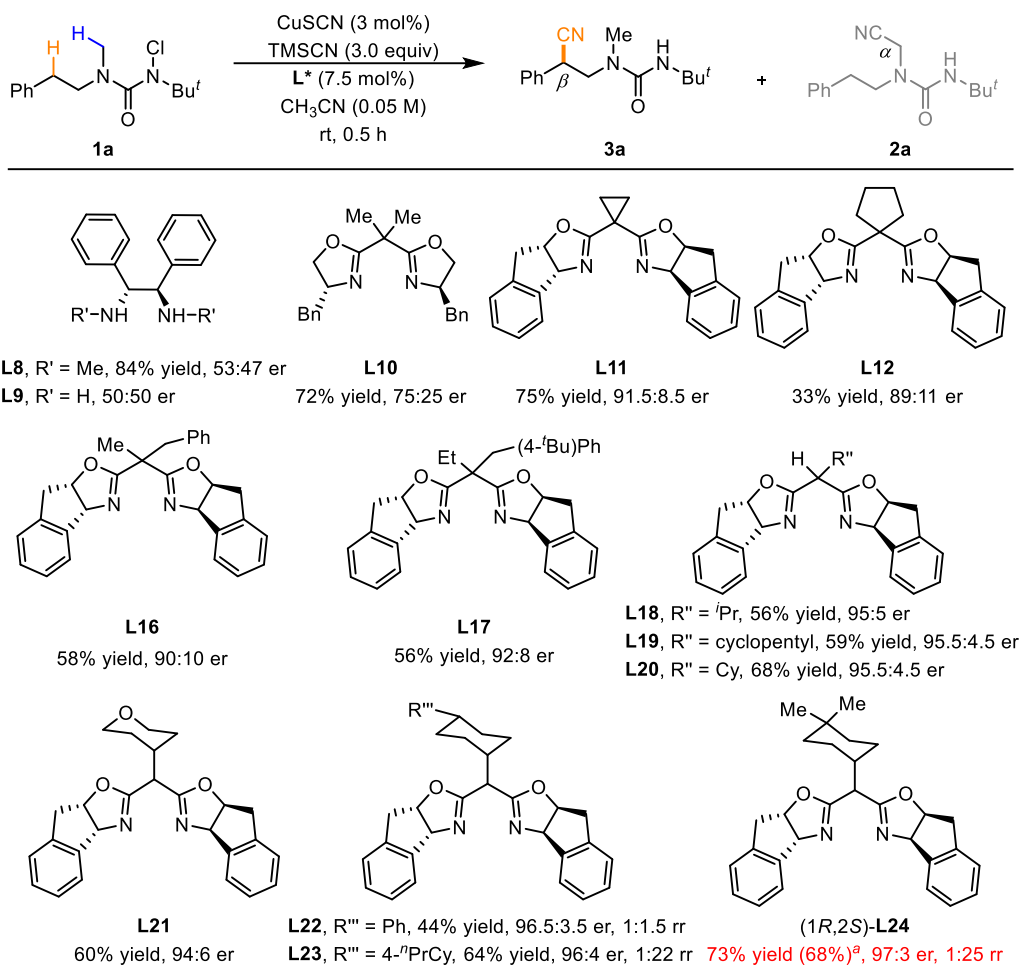

Reaction conditions: **1a** (0.1 mmol), CuSCN (3 mol%), **L\*** (7.5 mol%), TMSCN (3.0 equiv), CH<sub>3</sub>CN (2 mL), N<sub>2</sub>, rt, 0.5 h. The yields of **3a** and regioselectivity ratio (rr, **2a/3a**) were determined by GC-MS using dodecane as internal standard. Enantiomeric ratio (er) values detected by HPLC on a chiral stationary phase. <sup>a</sup>Isolated yield of **3a** was in parentheses.

**Table S5.** Screening chiral ligands for enantioselective cyanation of allylic C(sp<sup>3</sup>)-H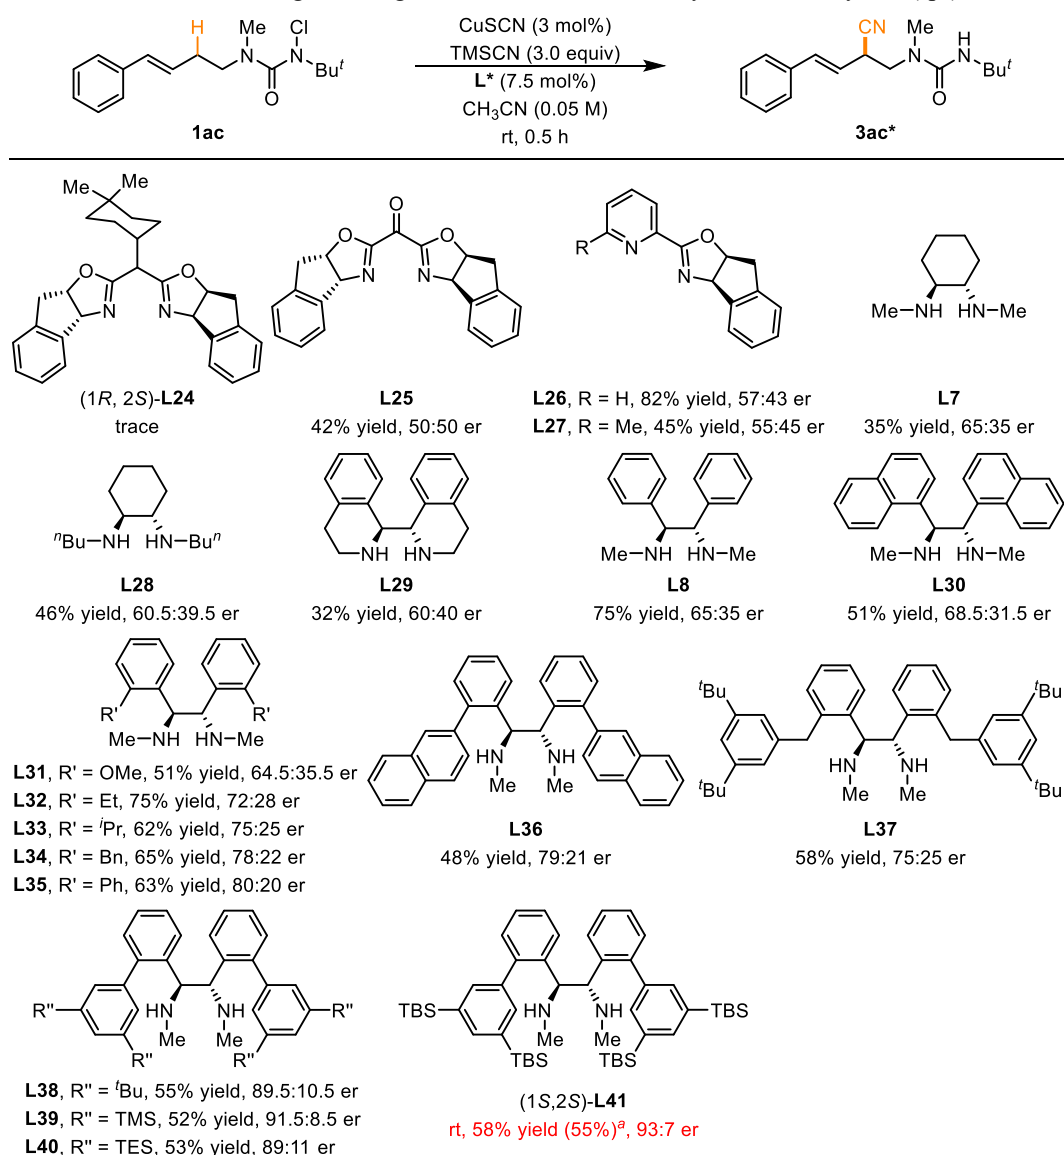

Reaction conditions: **1ac** (0.1 mmol), CuSCN (3 mol%), **L\*** (7.5 mol%), TMSCN (3.0 equiv), CH<sub>3</sub>CN (2 mL), N<sub>2</sub>, rt, 0.5 h. The yields of **3ac\*** were determined by GC-MS analysis using dodecane as internal standard. Enantiomeric ratio (er) values detected by HPLC on a chiral stationary phase. <sup>a</sup>Isolated yield of **3ac\*** was in parentheses.

**Table S6.** Screening other conditions for enantioselective cyanation of allylic C(sp<sup>3</sup>)-H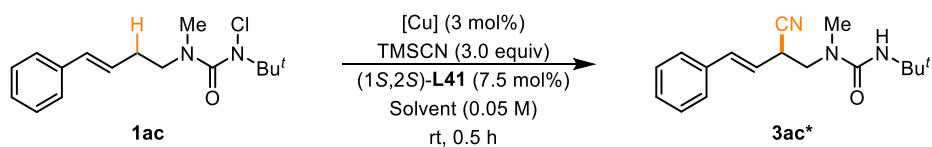

| Entry    | Catalyst                                            | Solvent                 | Yield of <b>3ac*</b> (%) | er          |
|----------|-----------------------------------------------------|-------------------------|--------------------------|-------------|
| <b>1</b> | <b>CuSCN</b>                                        | <b>CH<sub>3</sub>CN</b> | <b>58%</b>               | <b>93:7</b> |
| 2        | CuI                                                 | CH <sub>3</sub> CN      | 49%                      | 90:10       |
| 3        | Cu(CH <sub>3</sub> CN) <sub>4</sub> BF <sub>4</sub> | CH <sub>3</sub> CN      | 65%                      | 88:12       |
| 4        | CuTc                                                | CH <sub>3</sub> CN      | 41%                      | 91:9        |
| 5        | CuOAc                                               | CH <sub>3</sub> CN      | 50%                      | 88.5:11.5   |
| 6        | Cu <sub>2</sub> O                                   | CH <sub>3</sub> CN      | 65%                      | 91:9        |
| 7        | Cu(OTf) <sub>2</sub>                                | CH <sub>3</sub> CN      | 30%                      | 88.5:11.5   |
| 8        | Cu(NTf) <sub>2</sub>                                | CH <sub>3</sub> CN      | 25%                      | 88:12       |
| 9        | CuSCN                                               | Toluene                 | 56%                      | 75:25       |
| 10       | CuSCN                                               | PhCl                    | 47%                      | 75:25       |
| 11       | CuSCN                                               | Et <sub>2</sub> O       | 57%                      | 77.5:22.5   |
| 12       | CuSCN                                               | THF                     | 72%                      | 90:10       |
| 13       | CuSCN                                               | EtOAc                   | 81%                      | 88.5:11.5   |

Reaction conditions: **1ac** (0.1 mmol), [Cu] (3 mol%), (1*S*,2*S*)-**L41** (7.5 mol%), TMSCN (3.0 equiv), solvent (2 mL), N<sub>2</sub>, rt, 0.5 h. The yields were determined by GC-MS using dodecane as internal standard.

#### 4. General Procedure for Selective Cyanation of $\alpha'$ / $\beta$ -C(sp<sup>3</sup>)-H

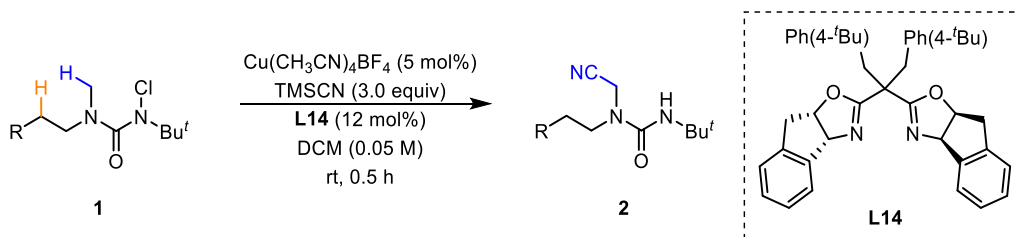

**Regioselective 1,4'-HAT cyanation of  $\alpha'$ -C(sp<sup>3</sup>)-H (condition A):** In a dried sealed 10 mL Schlenk tube equipped with a stir bar, Cu(CH<sub>3</sub>CN)<sub>4</sub>BF<sub>4</sub> (0.01 mmol, 5 mol%), **L14** (0.024 mmol, 12 mol%) and *N*-chloro substrate **1** (0.2 mmol) were dissolved in degassed DCM (4 mL) under N<sub>2</sub> atmosphere, then TMSCN (80  $\mu$ L, 0.6 mmol, 3.0 equiv) was added. The tube was sealed with Teflon septum and stirred at room temperature for 0.5 h. After completed (the color of solution generally changed from blue to colorless), the mixture was concentrated under reduced pressure, and the residue was purified by column chromatography or preparative thin-layer chromatography (PE / EA = 10 / 1) to provide desired products

**2.**

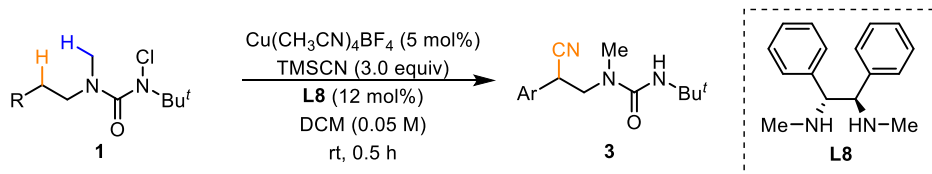



**Regioselective 1,5-HAT cyanation of  $\beta$ -C(sp<sup>3</sup>)-H (condition A):** In a dried sealed 10 mL Schlenk tube equipped with a stir bar, Cu(CH<sub>3</sub>CN)<sub>4</sub>BF<sub>4</sub> (0.01 mmol, 5 mol%), **L8** (0.024 mmol, 12 mol%) and *N*-chloro substrate **1** (0.2 mmol) were dissolved in degassed DCM (4 mL) under N<sub>2</sub> atmosphere, then TMSCN (80  $\mu$ L, 0.6 mmol, 3.0 equiv) was added. The tube was sealed with Teflon septum and stirred at room temperature for 0.5 h. After completed (the color of solution generally changed from blue to colorless), the mixture was concentrated under reduced pressure, and the residue was purified by column chromatography or preparative thin-layer chromatography (PE / EA = 10 / 1) to provide desired products **3**.

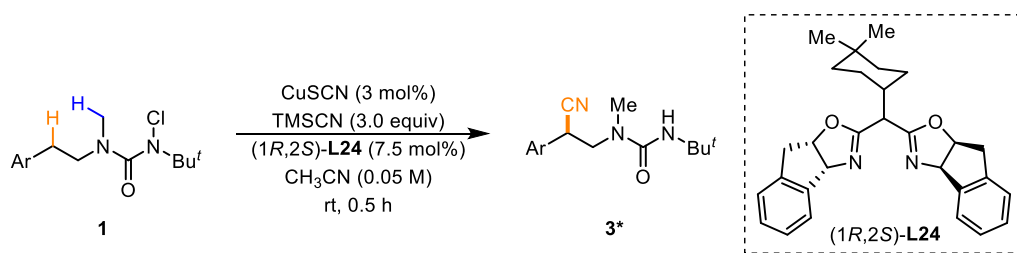

**Enantioselective 1,5-HAT cyanation of  $\beta$ -C(sp<sup>3</sup>)-H (condition B):** In a dried sealed 10 mL Schlenk tube equipped with a stir bar, CuSCN (0.006 mmol, 3 mol%), chiral bisoxazoline ligand (1*R*,2*S*)-**L24** (0.015 mmol, 7.5 mol%) and *N*-chloro substrate **1** (0.2 mmol) were dissolved in degassed CH<sub>3</sub>CN (4 mL) under N<sub>2</sub> atmosphere, then TMSCN (80  $\mu$ L, 0.6 mmol, 3.0 equiv) was added. The tube was sealed with Teflon septum and stirred at room temperature for 0.5 h. After completed (the color of solution generally changed from blue to colorless), the mixture was concentrated under reduced pressure, and the residue was purified by column chromatography or preparative thin-layer chromatography (PE / EA = 10 / 1) to provide desired products **3\***.

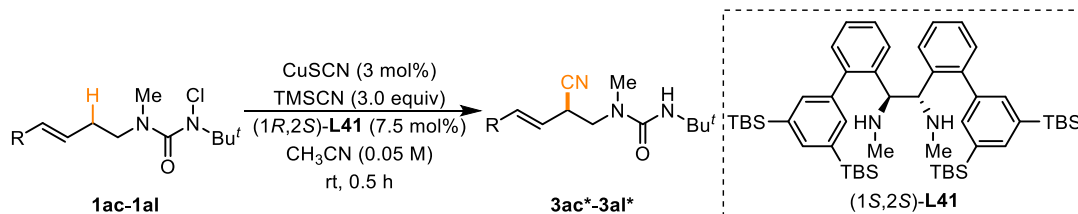

**Enantioselective 1,5-HAT cyanation of allylic  $\beta$ -C(sp<sup>3</sup>)-H (condition B):** In a dried sealed 10 mL Schlenk tube equipped with a stir bar, CuSCN (0.006 mmol, 3 mol%), chiral bisoxazoline ligand (1*S*,2*S*)-**L41** (0.015 mmol, 7.5 mol%) and *N*-chloro substrate **1ac-1al** (0.2 mmol) were dissolved in degassed CH<sub>3</sub>CN (4 mL) under N<sub>2</sub> atmosphere, then TMSCN (80  $\mu$ L, 0.6 mmol, 3.0 equiv) was added. The tube was sealed with Teflon septum and stirred at rt for 0.5 h. After completed (the color of solution generally changed from pink to pale-yellow), the mixture was concentrated under reduced pressure, and the residue was purified by column chromatography or preparative thin-layer chromatography (PE / EA = 10 / 1) to provide desired products **3ac\*-3al\***.

## 5. Crude <sup>1</sup>H NMR Analysis for Regiodivergent Cyanation

The reactions were done following the  $\alpha'$ / $\beta$ -C(sp<sup>3</sup>)-H cyanation procedures as stated above. After the reaction completed, the mixture was concentrated, and the residue (not purified) was dissolved in CDCl<sub>3</sub> and subjected to the <sup>1</sup>H NMR test. Analysis of <sup>1</sup>H NMR spectra indicated that the  $\alpha'$ / $\beta$ -regioselectivity of C(sp<sup>3</sup>)-H cyanation conducted by ligands **L14** and **L8** were excellent, which is accordance with the GC-MS detected.

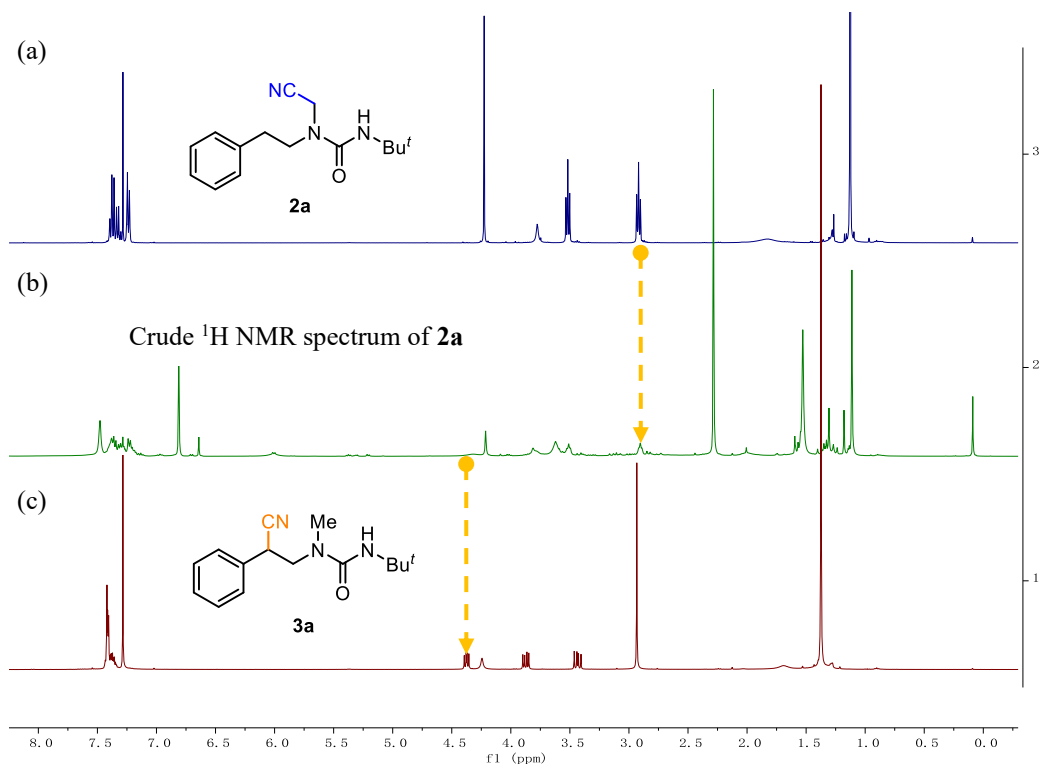

**Figure S1.** (a)  $^1\text{H}$  NMR of **2a**; (b) Crude  $^1\text{H}$  NMR of **2a**; (c)  $^1\text{H}$  NMR of **3a**

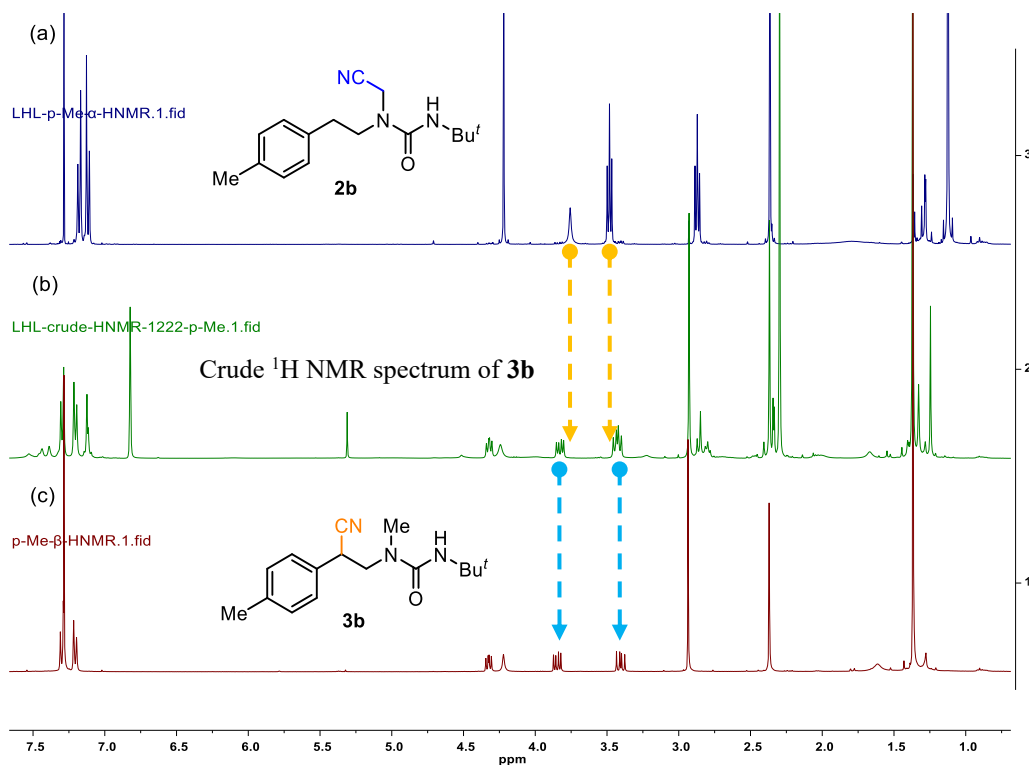

**Figure S2.** (a)  $^1\text{H}$  NMR of **2b**; (b) Crude  $^1\text{H}$  NMR of **3b**; (c)  $^1\text{H}$  NMR of **3b**

## 6. Mechanistic Studies

### 6.1. Nonlinear relationship between enantiopurity of L24 and product **3a**\*

The reactions were done following the same  $\beta\text{-C}(\text{sp}^3)\text{-H}$  cyanation procedures as stated above (condition

B) by using the chiral bisoxazoline ligand **L24** in different ees which were obtained by mixing (1*R*,2*S*)-**L24** and (1*S*,2*R*)-**L24** in specific ratios. After the completion of reaction, the product **3a\*** was purified and detected by HPLC analysis to provide the ee values. The ee values of (1*R*,2*S*)-**L24** and **3a\*** were shown in the table below.

|                        |     |     |     |       |      |
|------------------------|-----|-----|-----|-------|------|
| Ee value of <b>L24</b> | 20% | 40% | 60% | 80%   | 100% |
| Ee value of <b>3a*</b> | 22% | 37% | 57% | 74.5% | 94%  |

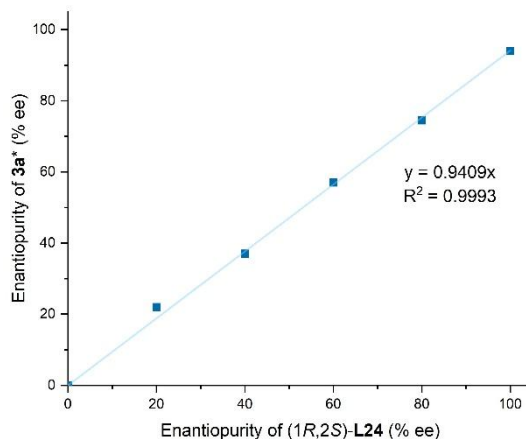

Figure S3. Non-linear effect study

## 6.2. Deuteration experiments

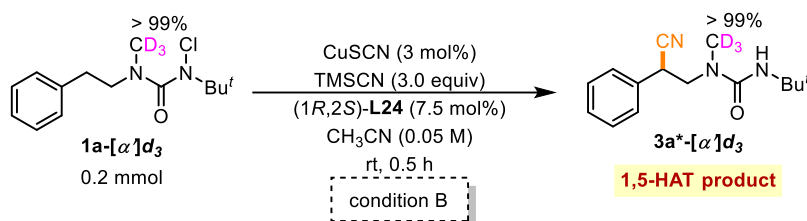

The reaction was conducted according to the general procedure. In a dried sealed 10 mL Schlenk tube equipped with a stir bar, CuSCN (0.006 mmol, 3 mol%), chiral bisoxazoline ligand (1*R*,2*S*)-**L24** (0.015 mmol, 7.5 mol%) and **1a**-[ $\alpha$ '] $d_3$  (0.2 mmol) were dissolved in degassed CH<sub>3</sub>CN (4 mL) under a N<sub>2</sub> atmosphere, then TMSCN (80  $\mu$ L, 0.6 mmol, 3.0 equiv) was added. The tube was sealed with Teflon septum and stirred at room temperature for 0.5 h. After completed, the mixture was concentrated under reduced pressure, and the residue was purified by preparative thin-layer chromatography (PE / EA = 10 / 1) to provide **3a\***-[ $\alpha$ '] $d_3$ .

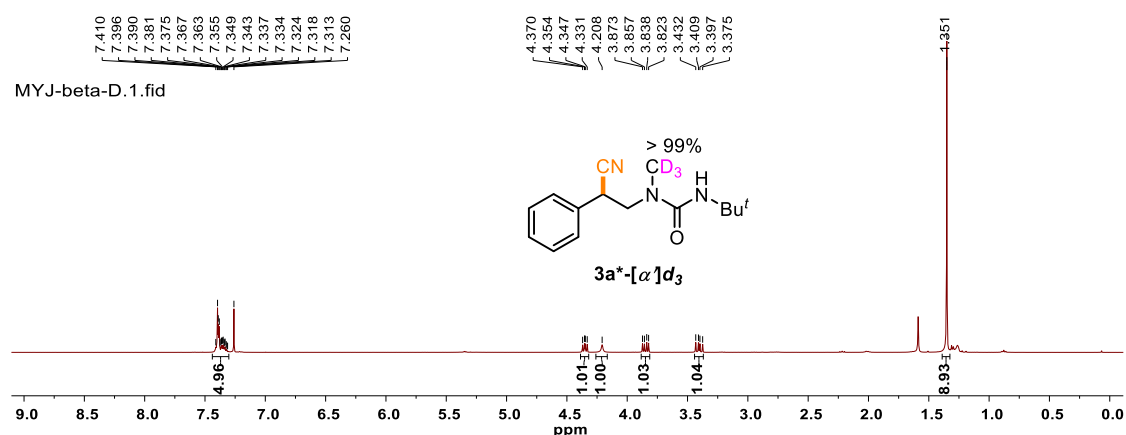

Figure S4.  $^1H$  NMR spectrum of  $3a^*-[α]d_3$

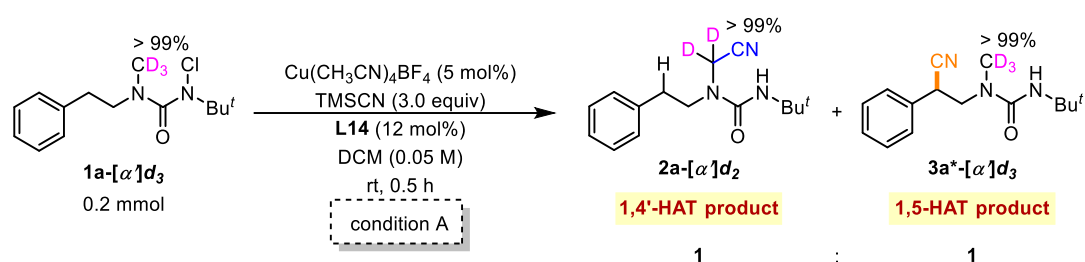

The reaction was conducted according to the general procedure. In a dried sealed 10 mL Schlenk tube equipped with a stir bar,  $Cu(CH_3CN)_4BF_4$  (0.01 mmol, 5 mol%), L14 (0.024 mmol, 12 mol%) and  $1a-[α]d_3$  (0.2 mmol) were dissolved in degassed DCM (4 mL) under a  $N_2$  atmosphere, then TMSCN (80  $\mu$ L, 0.6 mmol, 3.0 equiv) was added. The tube was sealed with Teflon septum and stirred at room temperature for 0.5 h. After completed, the mixture was concentrated under reduced pressure, and the residue was purified by preparative thin-layer chromatography (PE / EA = 10 / 1) to provide the mixture of  $2a-[α]d_2$  and  $3a^*-[α]d_3$ , which were difficult to separate and purified by column chromatography, and the ratio were determined by GC-MS.

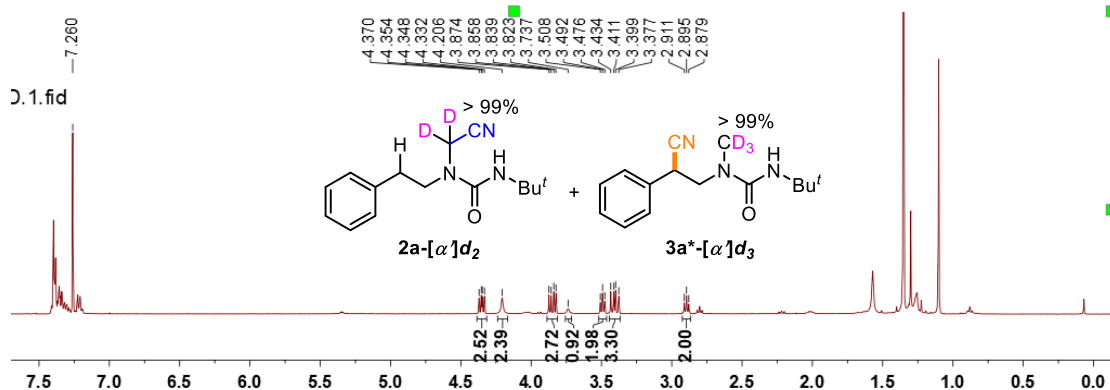

Figure S5.  $^1H$  NMR spectrum of  $2a-[α]d_2$  and  $3a^*-[α]d_3$

The intact of deuterated atoms on products  $2a-[α]d_2$  and  $3a^*-[α]d_3$  showed in Figure S4 and S5 indicated that the compound  $1a$  possibly underwent the direct 1,4'-HAT with L14 to provide  $\alpha'$ -cyanation product  $2a$ , and 1,5-HAT with (1*R*,2*S*)-L24 to provide  $\beta$ -cyanation product  $3a^*$ , rather than reversible HAT process<sup>9</sup> or radical transfer process (e.g.  $\beta$ -position transfer to  $\alpha'$ -position).

### 6.3. KIE experiments

#### (1) KIE of $\alpha'$ -C(sp<sup>3</sup>)-H cyanation

##### a) KIE determined from **1a**-[ $\beta$ ]*d*<sub>2</sub> and **1a**-*d*<sub>5</sub> under condition A

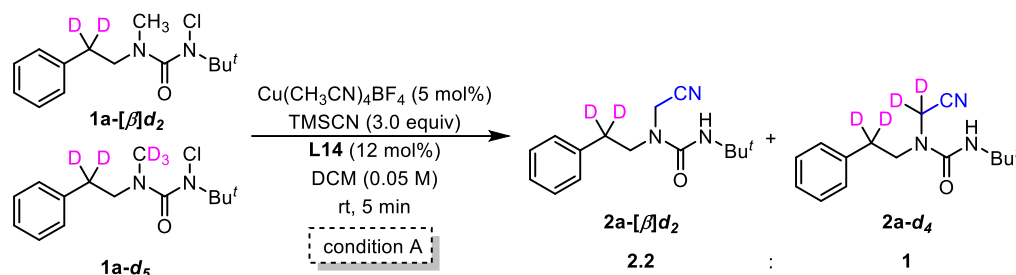

**Intramolecular cyanation of **1a**-*d*<sub>4</sub> under condition A:** In a dried sealed 10 mL Schlenk tube equipped with a stir bar, Cu(CH<sub>3</sub>CN)<sub>4</sub>BF<sub>4</sub> (0.01 mmol, 5 mol%), L14 (0.024 mmol, 12 mol%), **1a**-[ $\beta$ ]*d*<sub>2</sub> (0.1 mmol) and **1a**-*d*<sub>5</sub> (0.1 mmol) were dissolved in degassed DCM (4 mL) under a N<sub>2</sub> atmosphere, then TMSCN (80  $\mu$ L, 0.6 mmol, 3.0 equiv) was added. The tube was sealed with Teflon septum and stirred at room temperature for 5 min. After completed, the mixture was concentrated under reduced pressure, and the residue was purified by preparative thin-layer chromatography (PE / EA = 10 / 1) to provide the mixture of **2a**-[ $\beta$ ]*d*<sub>2</sub> and **2a**-*d*<sub>4</sub>. Based on the integrations between **2a**-[ $\beta$ ]*d*<sub>2</sub> and **2a**-*d*<sub>4</sub>, the KIE is calculated to be 2.2 (Figure S9).

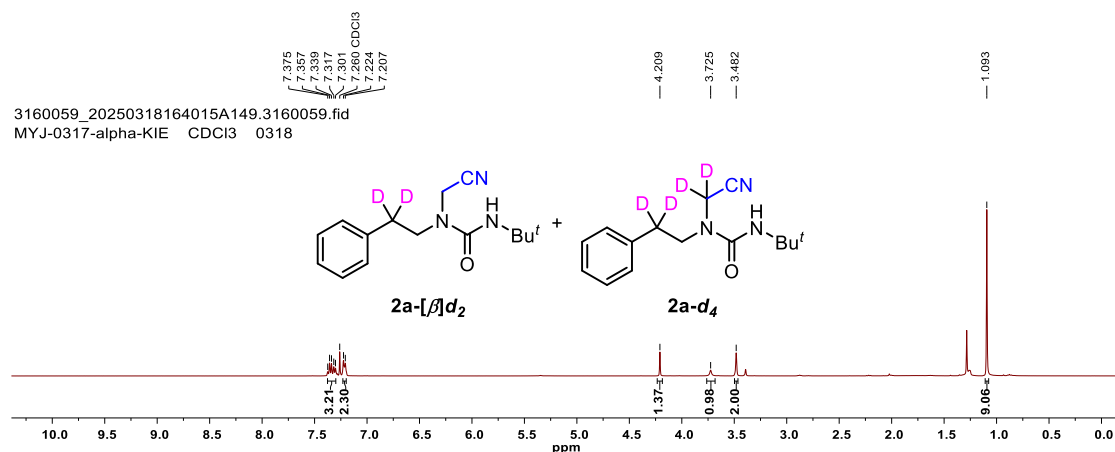

Figure S9. <sup>1</sup>H NMR spectrum of **2a** and **2a**-*d*<sub>4</sub>

##### b) KIE determined from parallel reactions under condition A

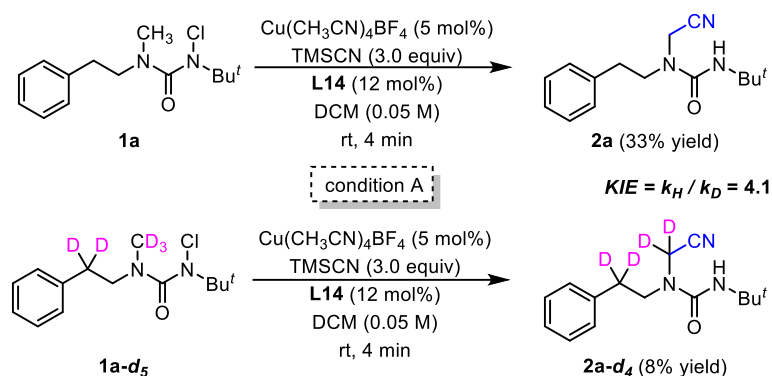

**Parallel reactions of **1a** and **1a**-*d*<sub>4</sub> under condition A:** In a dried sealed 10 mL Schlenk tube equipped with a stir bar, Cu(CH<sub>3</sub>CN)<sub>4</sub>BF<sub>4</sub> (0.01 mmol, 5 mol%), L14 (0.024 mmol, 12 mol%), **1a** (0.1 mmol) were

dissolved in degassed DCM (4 mL) under a N<sub>2</sub> atmosphere, then TMSCN (80 μL, 0.6 mmol, 3.0 equiv) was added. The tube was sealed with Teflon septum and stirred at room temperature for 4 min. After completed, the mixture was concentrated under reduced pressure, and the residue was purified by preparative thin-layer chromatography (PE / EA = 10 / 1) to provide **2a** (8.6 mg, 33% yield).

In a dried sealed 10 mL Schlenk tube equipped with a stir bar, Cu(CH<sub>3</sub>CN)<sub>4</sub>BF<sub>4</sub> (0.01 mmol, 5 mol%), **L14** (0.024 mmol, 12 mol%), **1a-d<sub>5</sub>** (0.1 mmol) were dissolved in degassed DCM (4 mL) under a N<sub>2</sub> atmosphere, then TMSCN (80 μL, 0.6 mmol, 3.0 equiv) was added. The tube was sealed with Teflon septum and stirred at room temperature for 5 min. After completed, the mixture was concentrated under reduced pressure, and the residue was purified by preparative thin-layer chromatography (PE / EA = 10 / 1) to provide **2a-d<sub>4</sub>** (2.1 mg, 8% yield).

## (2) KIE of β-C(sp<sup>3</sup>)-H cyanation

### a) KIE determined from **1a** and **1a-d<sub>5</sub>** under condition B

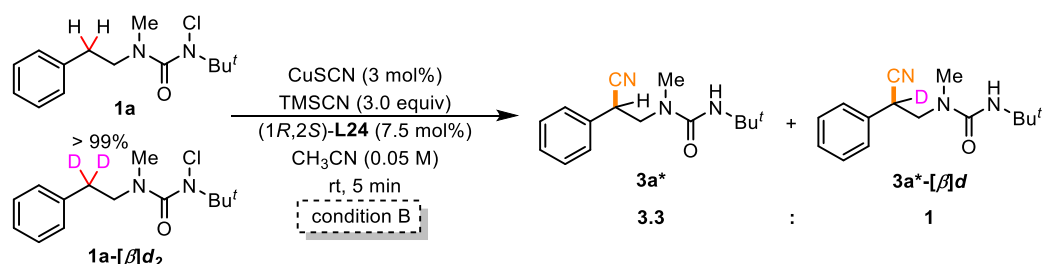

**One-pot cyanation of **1a** and **1a-βd<sub>2</sub>** under condition B:** In a dried sealed 10 mL Schlenk tube equipped with a stir bar, CuSCN (0.006 mmol, 3 mol%), chiral bisoxazoline ligand (1*R*,2*S*)-**L24** (0.015 mmol, 7.5 mol%), **1a** (0.1 mmol) and **1a-βd<sub>2</sub>** (0.1 mmol) were dissolved in degassed CH<sub>3</sub>CN (4 mL) under N<sub>2</sub> atmosphere, then TMSCN (80 μL, 0.6 mmol, 3.0 equiv) was added. The tube was sealed with Teflon septum and stirred at room temperature for 5 min. After completed, the mixture was concentrated under reduced pressure, and the residue was purified by preparative thin-layer chromatography (PE / EA = 10 / 1) to provide the mixture of **3a\*** and **3a\*-βd**. Based on the integrations between **3a\*** and **3a\*-βd**, the KIE is calculated to be 3.3 (Figure S6).

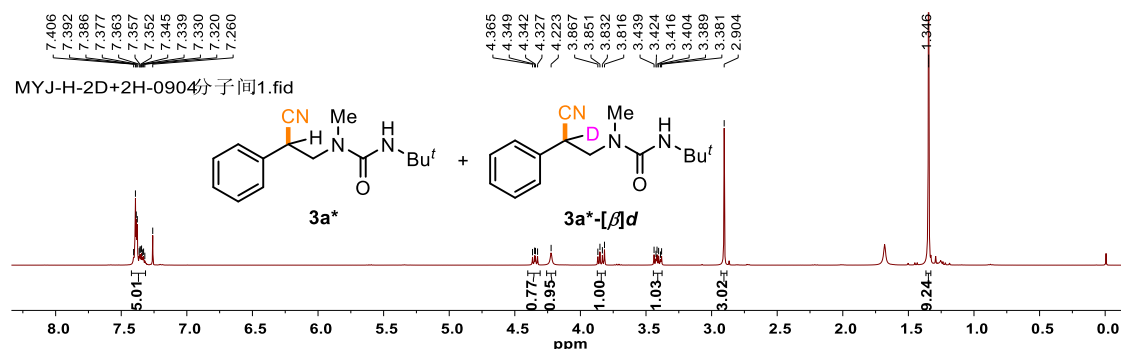

Figure S6. <sup>1</sup>H NMR spectrum of **3a\*** and **3a\*-βd**

### b) KIE determined from parallel reactions under condition B

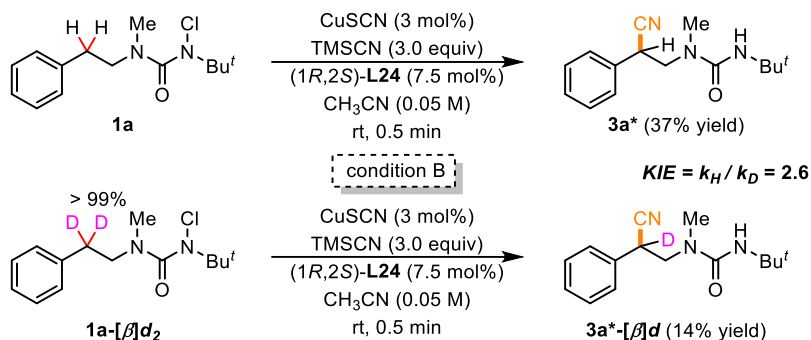

**Parallel reactions of 1a and 1a-[β]d<sub>2</sub> under condition B:** In a dried sealed 10 mL Schlenk tube equipped with a stir bar, CuSCN (0.006 mmol, 3 mol%), chiral bisoxazoline ligand (1*R*,2*S*)-**L24** (0.015 mmol, 7.5 mol%), **1a** (0.1 mmol) was dissolved in degassed CH<sub>3</sub>CN (4 mL) under N<sub>2</sub> atmosphere, then TMSCN (80 μL, 0.6 mmol, 3.0 equiv) was added. The tube was sealed with Teflon septum and stirred at room temperature for 0.5 min. After completed, the mixture was concentrated under reduced pressure, and the residue was purified by preparative thin-layer chromatography (PE / EA = 10 / 1) to provide **3a\*** (9.6 mg, 37% yield).

In a dried sealed 10 mL Schlenk tube equipped with a stir bar, CuSCN (0.006 mmol, 3 mol%), chiral bisoxazoline ligand (1*R*,2*S*)-**L24** (0.015 mmol, 7.5 mol%), **1a**-[β]d<sub>2</sub> (0.1 mmol) was dissolved in degassed CH<sub>3</sub>CN (4 mL) under N<sub>2</sub> atmosphere, then TMSCN (80 μL, 0.6 mmol, 3.0 equiv) was added. The tube was sealed with Teflon septum and stirred at room temperature for 0.5 min. After completed, the mixture was concentrated under reduced pressure, and the residue was purified by preparative thin-layer chromatography (PE / EA = 10 / 1) to provide **3a\***-[β]d (3.7 mg, 14% yield).

### c) KIE determined from 1a-d<sub>4</sub> under condition B

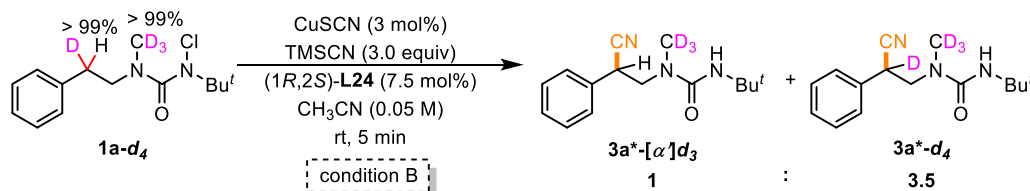

**Intramolecular cyanation of 1a-d<sub>4</sub> under condition B:** In a dried sealed 10 mL Schlenk tube equipped with a stir bar, CuSCN (0.006 mmol, 3 mol%), chiral bisoxazoline ligand (1*R*,2*S*)-**L24** (0.015 mmol, 7.5 mol%), **1a-d<sub>4</sub>** (0.2 mmol) were dissolved in degassed CH<sub>3</sub>CN (4 mL) under a N<sub>2</sub> atmosphere, then TMSCN (80 μL, 0.6 mmol, 3.0 equiv) was added. The tube was sealed with Teflon septum and stirred at room temperature for 5 min. After completed, the mixture was concentrated under reduced pressure, and the residue was purified by preparative thin-layer chromatography (PE / EA = 10 / 1) to provide the mixture of **3a\***-[α']d<sub>3</sub> and **3a\***-d<sub>4</sub>. Based on the integrations between **3a\***-[α']d<sub>3</sub> and **3a\***-d<sub>4</sub>, the KIE is calculated to be 3.5 (Figure S7).

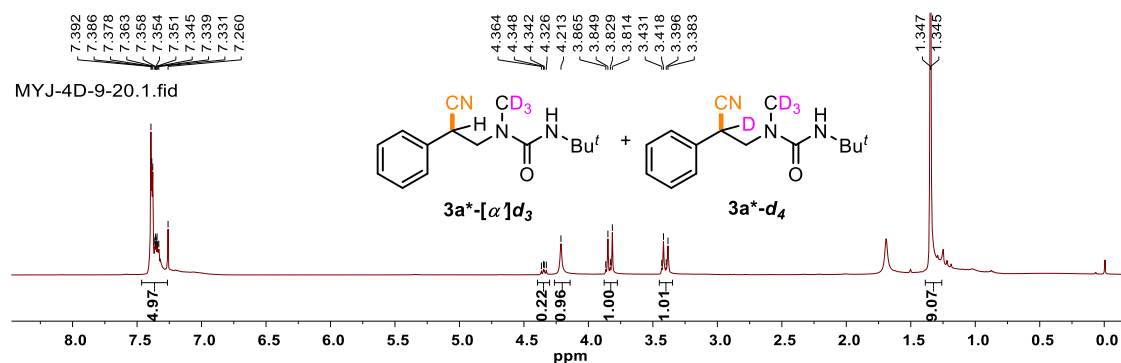

Figure S7.  $^1\text{H}$  NMR spectrum of  $3\text{a}^*-\alpha'\text{d}_3$  and  $3\text{a}^*-\text{d}_4$

### (3) KIE of $\beta\text{-C}(\text{sp}^3)\text{-H}$ cyanation under condition A

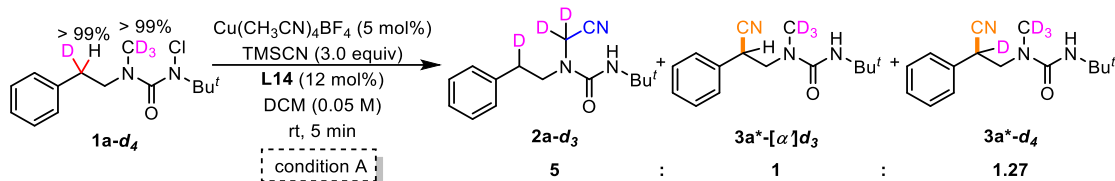

**Intramolecular cyanation of  $1\text{a}-\text{d}_4$  under condition A:** In a dried sealed 10 mL Schlenk tube equipped with a stir bar,  $\text{Cu}(\text{CH}_3\text{CN})_4\text{BF}_4$  (0.01 mmol, 5 mol%), **L14** (0.024 mmol, 12 mol%) and  $1\text{a}-\text{d}_4$  (0.2 mmol) were dissolved in degassed DCM (4 mL) under a  $\text{N}_2$  atmosphere, then TMSCN (80  $\mu\text{L}$ , 0.6 mmol, 3.0 equiv) was added. The tube was sealed with Teflon septum and stirred at room temperature for 5 min. After completed, the mixture was concentrated under reduced pressure, and the residue was purified by preparative thin-layer chromatography (PE / EA = 10 / 1) to provide the mixture of  $3\text{a}^*-\alpha'\text{d}_3$  and  $3\text{a}^*-\text{d}_4$ . Based on the integrations between  $3\text{a}^*-\alpha'\text{d}_3$  and  $3\text{a}^*-\text{d}_4$ , the KIE is calculated to be 1.27 (Figure S8).

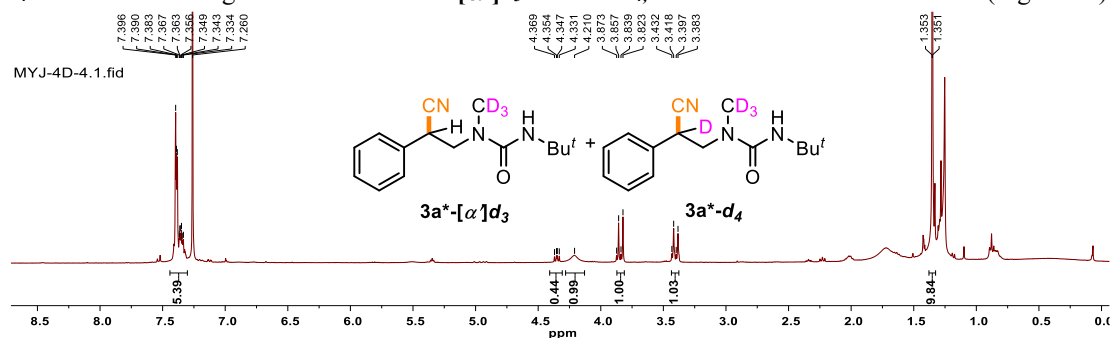

Figure S8.  $^1\text{H}$  NMR spectrum of  $3\text{a}^*-\alpha'\text{d}_3$  and  $3\text{a}^*-\text{d}_4$  under condition A

## 6.4. Proposed mechanism

Based on the above observations and previous literatures,<sup>10,11</sup> a plausible mechanism involving a selective HAT process as well as the proposed energy profile diagrams are depicted in Fig. S10. Firstly, the  $[\text{LCu}^{\text{I}}\text{CN}]$  species **I/I'**, formed *via* a transmetalation of each  $\text{LCu}^{\text{I}}$  catalysts with TMSCN under condition A or B, could undergo a single electron transfer with *N*-Cl urea **1** to generate a *N*-centered radical **II** and  $[\text{LCu}^{\text{II}}(\text{Cl})\text{CN}]$  intermediates **III/III'**. For  $\alpha'$ -cyanation process under condition A, the radical **II** would undergo the selective 1,4'-HAT to form an  $\alpha'$ -aminomethyl radical **IV'** in the presence of  $[\text{L14-Cu}^{\text{II}}(\text{X})\text{CN}]$  intermediate **III'**, which probably retards the radical trapping at the sterically more demanding  $\beta$ -position by sterically encumbered ligand **L14** and therefore facilitates the  $\alpha'$ -C-H



cyanation at the less congested *N*-methyl group. We speculate that the entire activation free energy for  $\beta$  C-centered radical cyanation is probably higher than 1,4'-HAT process under condition A, thus  $\alpha'$ -C-H cyanation should be kinetically more feasible (Fig. S10B, condition A). As a result, increasing the BDE of  $\alpha'$ -C-H bonds (also the activation free energy of 1,4'-HAT is increased) by replacing *N*-CH<sub>3</sub> (~93 kcal/mol) with *N*-CD<sub>3</sub> (~96 kcal/mol) leads to the poor  $\alpha'/\beta$  regioselectivity (1:1, see Fig. 5D). Finally, the combination of  $\alpha'$ -radical **IV'** and Cu<sup>II</sup>-cyanide adduct **III'** affords the  $\alpha'$ -cyanation products **2** and [L14-Cu<sup>I</sup>X] species **VI'**, which then regenerates the [L14-Cu<sup>I</sup>CN] species **I'** with TMSCN.<sup>12,13</sup> However, another pathway involved an iminium ion intermediate also cannot be totally excluded.<sup>14,15</sup> For  $\beta$ -cyanation process under condition B, the radical **II** would undergo the entropically and enthalpically favored 1,5-HAT (see Fig. S10B, condition B) to form a benzylic  $\beta$  C-centered radical **IV**, which recombines with [L'-Cu<sup>II</sup>(X)CN] intermediate **III** to form a Cu<sup>III</sup> complex **V**. Lastly, reductive elimination of **V** provides the  $\beta$ -cyanation products **3** or **3\*** along with the regenerated Cu<sup>I</sup> catalyst.

#### A. Proposed catalytic cycles

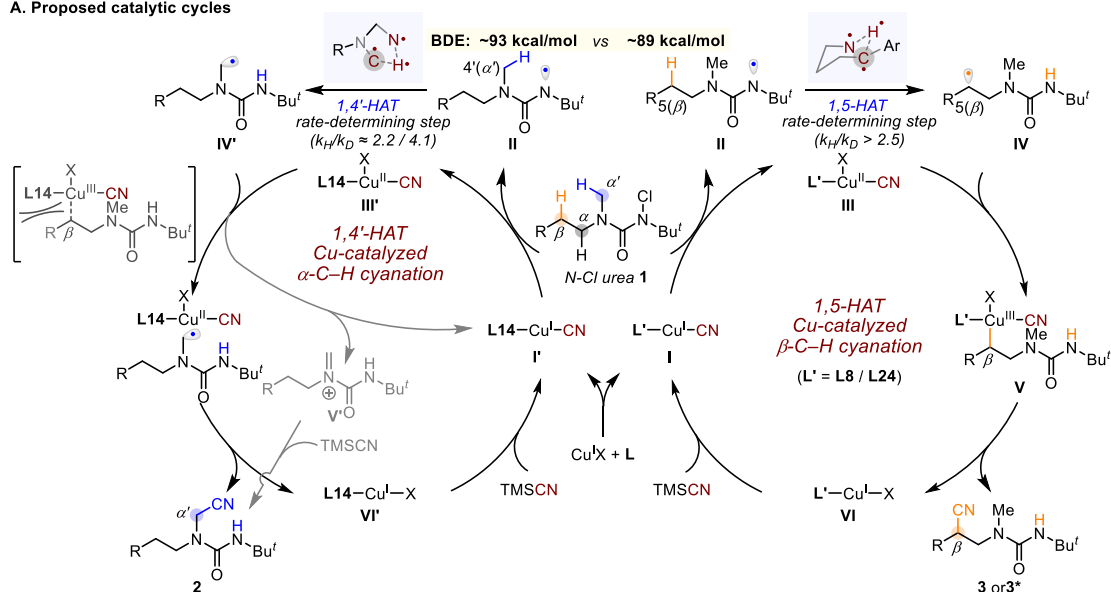

#### B. Proposed energy profile diagrams (supported by deuteration & KIE experiments)

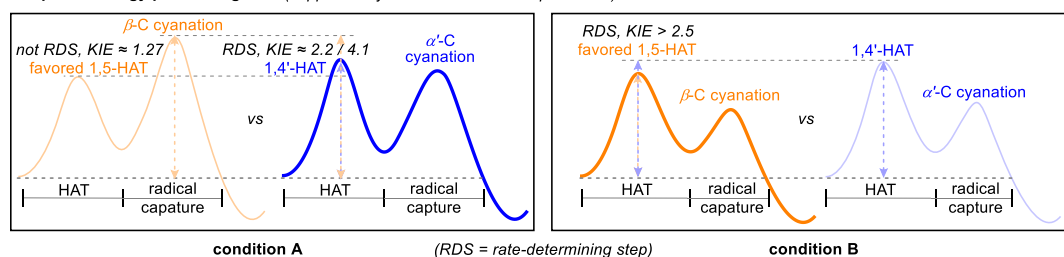

Figure S10. Proposed mechanism for selective  $\alpha'/\beta$ -cyanation

### 6.5. DFT calculations for BDE analysis

All calculations were carried out with the Gaussian 16 software.<sup>16</sup> The M06-2X functional was adopted for all calculations. For geometry optimization and frequency calculations, the def2-SVP basis set was used. The single point energy calculations were performed with a larger basis set def2-TZVP basis set. The DFT-D3 dispersion correction was applied to correct the weak interaction to improve the calculation accuracy. The SMD implicit solvation model was used to account for the solvation effect. Finally, the single point energy of each compound was added to the free energy correction terms calculated before to obtain the Gibbs free energy. Bond dissociation energies for the C-H bonds were determined by

calculating the difference in energies between the optimized starting substrates and their radical energies plus hydrogen atom energies.

$$BDE = [E(\text{radical}) + E(H)] - E(\text{molecule})$$

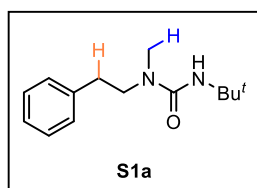

**S1a** = -458763.5 kcal/mol  
 $\alpha'$ -rad-**S1a** = -458359.6 kcal/mol      $\alpha'$ -C-H BDE: 93 kcal/mol  
 $\beta$ -rad-**S1a** = -458364.1 kcal/mol      $\beta$ -C-H BDE: 89 kcal/mol  
 $H_{\text{atom}}$  = -310.6 kcal/mol

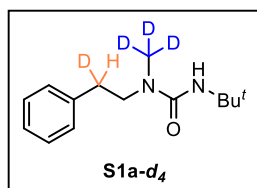

**S1a-d<sub>4</sub>** = -458771.3 kcal/mol  
 $\alpha'$ -D-rad-**S1a** = -458365.0 kcal/mol      $\alpha'$ -C-D BDE: 96 kcal/mol  
 $\beta$ -D-rad-**S1a** = -458370.0 kcal/mol      $\beta$ -C-D BDE: 91 kcal/mol  
 $\beta$ -rad-**S1a** = -458371.8 kcal/mol      $\beta$ -C-H BDE: 89 kcal/mol  
 $D_{\text{atom}}$  = -310.6 kcal/mol  
 $H_{\text{atom}}$  = -310.6 kcal/mol

### N-phenethyl-N-methyl urea (**S1a**)

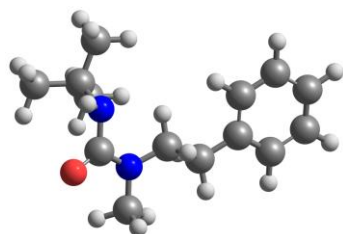

|   |          |          |          |
|---|----------|----------|----------|
| C | -2.68361 | 0.1146   | -0.16833 |
| C | -1.30067 | 0.09996  | -0.2212  |
| C | -0.54669 | 0.43011  | 0.89678  |
| C | -1.20463 | 0.76836  | 2.07324  |
| C | -2.58633 | 0.78411  | 2.12835  |
| C | -3.32976 | 0.4568   | 1.00674  |
| H | -3.25804 | -0.14133 | -1.04671 |
| H | -0.80124 | -0.1656  | -1.14247 |
| H | -0.62564 | 1.02369  | 2.94937  |
| H | -3.0855  | 1.05274  | 3.048    |
| H | -4.40884 | 0.46926  | 1.04862  |
| C | 0.95256  | 0.37007  | 0.86198  |
| H | 1.30926  | 0.49617  | -0.16093 |
| H | 1.37558  | 1.16291  | 1.48194  |
| C | 1.41906  | -0.98526 | 1.42657  |
| H | 1.12382  | -1.78706 | 0.74081  |
| H | 0.93369  | -1.13547 | 2.38981  |
| N | 2.84517  | -1.04086 | 1.63497  |
| C | 3.68265  | -1.0095  | 0.4584   |
| H | 4.71299  | -1.16914 | 0.7702   |
| H | 3.37657  | -1.80174 | -0.22711 |
| H | 3.62219  | -0.04699 | -0.05489 |

|   |         |          |         |
|---|---------|----------|---------|
| C | 3.42579 | -0.86455 | 2.84778 |
| O | 4.60912 | -0.62307 | 2.98359 |
| N | 2.52721 | -0.95472 | 3.94308 |
| H | 2.86284 | -0.31452 | 4.65931 |
| C | 2.36446 | -2.27351 | 4.59005 |
| C | 2.28695 | -3.39767 | 3.55707 |
| H | 1.43337 | -3.27351 | 2.89773 |
| H | 3.19336 | -3.43075 | 2.95725 |
| H | 2.18322 | -4.34908 | 4.07338 |
| C | 1.06084 | -2.21289 | 5.39191 |
| H | 0.89093 | -3.15558 | 5.90498 |
| H | 1.10702 | -1.41785 | 6.1322  |
| H | 0.21962 | -2.01671 | 4.73162 |
| C | 3.55006 | -2.54189 | 5.52699 |
| H | 3.57631 | -1.80725 | 6.33026 |
| H | 3.47609 | -3.53234 | 5.96924 |
| H | 4.48278 | -2.47487 | 4.97044 |

$\alpha'$ -radical-*N*-phenethyl-*N*-methyl urea ( $\alpha'$ -rad-**S1a**)

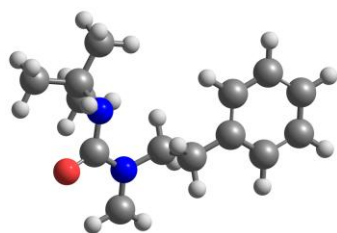

|   |          |          |          |
|---|----------|----------|----------|
| C | -2.68361 | 0.1146   | -0.16833 |
| C | -1.30067 | 0.09996  | -0.2212  |
| C | -0.54669 | 0.43011  | 0.89678  |
| C | -1.20463 | 0.76836  | 2.07324  |
| C | -2.58633 | 0.78411  | 2.12835  |
| C | -3.32976 | 0.4568   | 1.00674  |
| H | -3.25804 | -0.14133 | -1.04671 |
| H | -0.80124 | -0.1656  | -1.14247 |
| H | -0.62564 | 1.02369  | 2.94937  |
| H | -3.0855  | 1.05274  | 3.048    |
| H | -4.40884 | 0.46926  | 1.04862  |
| C | 0.95256  | 0.37007  | 0.86198  |
| H | 1.30926  | 0.49617  | -0.16093 |
| H | 1.37558  | 1.16291  | 1.48194  |
| C | 1.41906  | -0.98526 | 1.42657  |
| H | 1.12382  | -1.78706 | 0.74081  |
| H | 0.93369  | -1.13547 | 2.38981  |
| N | 2.84517  | -1.04086 | 1.63497  |
| C | 3.68265  | -1.0095  | 0.4584   |

|   |         |          |          |
|---|---------|----------|----------|
| H | 4.71299 | -1.16914 | 0.7702   |
| H | 3.37657 | -1.80174 | -0.22711 |
| C | 3.42579 | -0.86455 | 2.84778  |
| O | 4.60912 | -0.62307 | 2.98359  |
| N | 2.52721 | -0.95472 | 3.94308  |
| H | 2.86284 | -0.31452 | 4.65931  |
| C | 2.36446 | -2.27351 | 4.59005  |
| C | 2.28695 | -3.39767 | 3.55707  |
| H | 1.43337 | -3.27351 | 2.89773  |
| H | 3.19336 | -3.43075 | 2.95725  |
| H | 2.18322 | -4.34908 | 4.07338  |
| C | 1.06084 | -2.21289 | 5.39191  |
| H | 0.89093 | -3.15558 | 5.90498  |
| H | 1.10702 | -1.41785 | 6.1322   |
| H | 0.21962 | -2.01671 | 4.73162  |
| C | 3.55006 | -2.54189 | 5.52699  |
| H | 3.57631 | -1.80725 | 6.33026  |
| H | 3.47609 | -3.53234 | 5.96924  |
| H | 4.48278 | -2.47487 | 4.97044  |

$\beta$ -radical-*N*-phenethyl-*N*-methyl urea ( $\beta$ -rad-S1a)

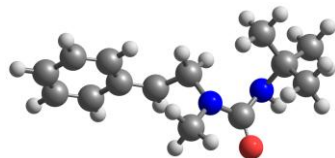

|   |          |          |          |
|---|----------|----------|----------|
| C | -2.68361 | 0.1146   | -0.16833 |
| C | -1.30067 | 0.09996  | -0.2212  |
| C | -0.54669 | 0.43011  | 0.89678  |
| C | -1.20463 | 0.76836  | 2.07324  |
| C | -2.58633 | 0.78411  | 2.12835  |
| C | -3.32976 | 0.4568   | 1.00674  |
| H | -3.25804 | -0.14133 | -1.04671 |
| H | -0.80124 | -0.1656  | -1.14247 |
| H | -0.62564 | 1.02369  | 2.94937  |
| H | -3.0855  | 1.05274  | 3.048    |
| H | -4.40884 | 0.46926  | 1.04862  |
| C | 0.95256  | 0.37007  | 0.86198  |
| H | 1.37558  | 1.16291  | 1.48194  |
| C | 1.41906  | -0.98526 | 1.42657  |
| H | 1.12382  | -1.78706 | 0.74081  |
| H | 0.93369  | -1.13547 | 2.38981  |
| N | 2.84517  | -1.04086 | 1.63497  |
| C | 3.68265  | -1.0095  | 0.4584   |
| H | 4.71299  | -1.16914 | 0.7702   |

|   |         |          |          |
|---|---------|----------|----------|
| H | 3.37657 | -1.80174 | -0.22711 |
| H | 3.62219 | -0.04699 | -0.05489 |
| C | 3.42579 | -0.86455 | 2.84778  |
| O | 4.60912 | -0.62307 | 2.98359  |
| N | 2.52721 | -0.95472 | 3.94308  |
| H | 2.86284 | -0.31452 | 4.65931  |
| C | 2.36446 | -2.27351 | 4.59005  |
| C | 2.28695 | -3.39767 | 3.55707  |
| H | 1.43337 | -3.27351 | 2.89773  |
| H | 3.19336 | -3.43075 | 2.95725  |
| H | 2.18322 | -4.34908 | 4.07338  |
| C | 1.06084 | -2.21289 | 5.39191  |
| H | 0.89093 | -3.15558 | 5.90498  |
| H | 1.10702 | -1.41785 | 6.1322   |
| H | 0.21962 | -2.01671 | 4.73162  |
| C | 3.55006 | -2.54189 | 5.52699  |
| H | 3.57631 | -1.80725 | 6.33026  |
| H | 3.47609 | -3.53234 | 5.96924  |
| H | 4.48278 | -2.47487 | 4.97044  |

**S1a-d4**

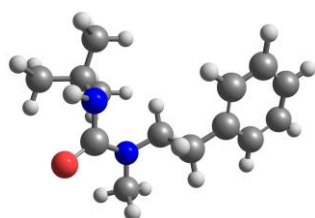

|          |          |          |          |
|----------|----------|----------|----------|
| H(Iso=2) | -0.70771 | 3.49152  | -0.38121 |
| H(Iso=2) | -0.43742 | 3.12467  | 1.35149  |
| H(Iso=2) | -2.09845 | 3.22487  | 0.68802  |
| H(Iso=2) | 1.51581  | 2.24728  | -0.48712 |
| C        | 4.77808  | 0.13419  | 0.61186  |
| C        | 3.6395   | 0.90278  | 0.36711  |
| C        | 2.5535   | 0.37061  | -0.33543 |
| C        | 2.62994  | -0.95494 | -0.78282 |
| C        | 3.76497  | -1.72598 | -0.54071 |
| C        | 4.84396  | -1.18237 | 0.15822  |
| H        | 5.61823  | 0.56739  | 1.15717  |
| H        | 3.59412  | 1.93556  | 0.72125  |
| H        | 1.78618  | -1.38153 | -1.33236 |
| H        | 3.81008  | -2.75483 | -0.9017  |
| H        | 5.7346   | -1.78381 | 0.34634  |
| C        | 1.29651  | 1.17133  | -0.55931 |
| H        | 0.90157  | 0.98064  | -1.56983 |

|   |          |          |          |
|---|----------|----------|----------|
| C | 0.2089   | 0.78435  | 0.45339  |
| H | 0.55669  | 1.00101  | 1.47685  |
| H | 0.03365  | -0.2931  | 0.38165  |
| N | -1.04606 | 1.47933  | 0.22611  |
| C | -1.07007 | 2.90707  | 0.48077  |
| C | -2.04091 | 0.9794   | -0.56846 |
| O | -2.88207 | 1.69738  | -1.0799  |
| N | -2.01065 | -0.42267 | -0.76653 |
| H | -2.45399 | -0.58213 | -1.6702  |
| C | -2.72437 | -1.27817 | 0.22628  |
| C | -2.44144 | -0.8351  | 1.66228  |
| H | -1.36923 | -0.86119 | 1.89801  |
| H | -2.81769 | 0.17962  | 1.85432  |
| H | -2.95511 | -1.52271 | 2.34879  |
| C | -2.22361 | -2.70655 | 0.01599  |
| H | -2.75547 | -3.40679 | 0.67654  |
| H | -2.38925 | -3.024   | -1.02461 |
| H | -1.14611 | -2.76904 | 0.22655  |
| C | -4.23518 | -1.20086 | -0.02936 |
| H | -4.47536 | -1.57108 | -1.03829 |
| H | -4.78819 | -1.81243 | 0.69858  |
| H | -4.58216 | -0.16005 | 0.04302  |

*$\alpha$* -D-rad-S1a-d4

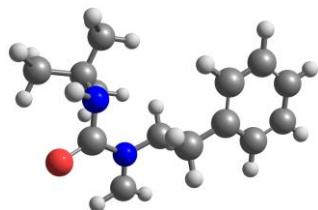

|          |          |          |          |
|----------|----------|----------|----------|
| H(Iso=2) | -0.70771 | 3.49152  | -0.38121 |
| H(Iso=2) | -0.43742 | 3.12467  | 1.35149  |
| H(Iso=2) | 1.51581  | 2.24728  | -0.48712 |
| C        | 4.77808  | 0.13419  | 0.61186  |
| C        | 3.6395   | 0.90278  | 0.36711  |
| C        | 2.5535   | 0.37061  | -0.33543 |
| C        | 2.62994  | -0.95494 | -0.78282 |
| C        | 3.76497  | -1.72598 | -0.54071 |
| C        | 4.84396  | -1.18237 | 0.15822  |
| H        | 5.61823  | 0.56739  | 1.15717  |
| H        | 3.59412  | 1.93556  | 0.72125  |
| H        | 1.78618  | -1.38153 | -1.33236 |
| H        | 3.81008  | -2.75483 | -0.9017  |
| H        | 5.7346   | -1.78381 | 0.34634  |

|   |          |          |          |
|---|----------|----------|----------|
| C | 1.29651  | 1.17133  | -0.55931 |
| H | 0.90157  | 0.98064  | -1.56983 |
| C | 0.2089   | 0.78435  | 0.45339  |
| H | 0.55669  | 1.00101  | 1.47685  |
| H | 0.03365  | -0.2931  | 0.38165  |
| N | -1.04606 | 1.47933  | 0.22611  |
| C | -1.07007 | 2.90707  | 0.48077  |
| C | -2.04091 | 0.9794   | -0.56846 |
| O | -2.88207 | 1.69738  | -1.0799  |
| N | -2.01065 | -0.42267 | -0.76653 |
| H | -2.45399 | -0.58213 | -1.6702  |
| C | -2.72437 | -1.27817 | 0.22628  |
| C | -2.44144 | -0.8351  | 1.66228  |
| H | -1.36923 | -0.86119 | 1.89801  |
| H | -2.81769 | 0.17962  | 1.85432  |
| H | -2.95511 | -1.52271 | 2.34879  |
| C | -2.22361 | -2.70655 | 0.01599  |
| H | -2.75547 | -3.40679 | 0.67654  |
| H | -2.38925 | -3.024   | -1.02461 |
| H | -1.14611 | -2.76904 | 0.22655  |
| C | -4.23518 | -1.20086 | -0.02936 |
| H | -4.47536 | -1.57108 | -1.03829 |
| H | -4.78819 | -1.81243 | 0.69858  |
| H | -4.58216 | -0.16005 | 0.04302  |

*$\beta$* -D-rad-S1a-d<sub>4</sub>

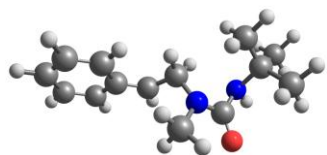

|          |          |          |          |
|----------|----------|----------|----------|
| H(Iso=2) | -0.70771 | 3.49152  | -0.38121 |
| H(Iso=2) | -0.43742 | 3.12467  | 1.35149  |
| H(Iso=2) | -2.09845 | 3.22487  | 0.68802  |
| C        | 4.77808  | 0.13419  | 0.61186  |
| C        | 3.6395   | 0.90278  | 0.36711  |
| C        | 2.5535   | 0.37061  | -0.33543 |
| C        | 2.62994  | -0.95494 | -0.78282 |
| C        | 3.76497  | -1.72598 | -0.54071 |
| C        | 4.84396  | -1.18237 | 0.15822  |
| H        | 5.61823  | 0.56739  | 1.15717  |
| H        | 3.59412  | 1.93556  | 0.72125  |
| H        | 1.78618  | -1.38153 | -1.33236 |
| H        | 3.81008  | -2.75483 | -0.9017  |
| H        | 5.7346   | -1.78381 | 0.34634  |

|   |          |          |          |
|---|----------|----------|----------|
| C | 1.29651  | 1.17133  | -0.55931 |
| H | 0.90157  | 0.98064  | -1.56983 |
| C | 0.2089   | 0.78435  | 0.45339  |
| H | 0.55669  | 1.00101  | 1.47685  |
| H | 0.03365  | -0.2931  | 0.38165  |
| N | -1.04606 | 1.47933  | 0.22611  |
| C | -1.07007 | 2.90707  | 0.48077  |
| C | -2.04091 | 0.9794   | -0.56846 |
| O | -2.88207 | 1.69738  | -1.0799  |
| N | -2.01065 | -0.42267 | -0.76653 |
| H | -2.45399 | -0.58213 | -1.6702  |
| C | -2.72437 | -1.27817 | 0.22628  |
| C | -2.44144 | -0.8351  | 1.66228  |
| H | -1.36923 | -0.86119 | 1.89801  |
| H | -2.81769 | 0.17962  | 1.85432  |
| H | -2.95511 | -1.52271 | 2.34879  |
| C | -2.22361 | -2.70655 | 0.01599  |
| H | -2.75547 | -3.40679 | 0.67654  |
| H | -2.38925 | -3.024   | -1.02461 |
| H | -1.14611 | -2.76904 | 0.22655  |
| C | -4.23518 | -1.20086 | -0.02936 |
| H | -4.47536 | -1.57108 | -1.03829 |
| H | -4.78819 | -1.81243 | 0.69858  |
| H | -4.58216 | -0.16005 | 0.04302  |

*$\beta$ -rad-S1a-d<sub>4</sub>*

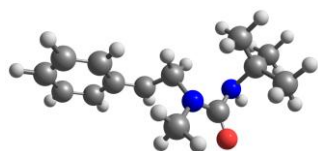

|          |          |          |          |
|----------|----------|----------|----------|
| H(Iso=2) | 0.6255   | 2.32845  | 0.78822  |
| H(Iso=2) | 0.70298  | 0.98744  | 1.96656  |
| H(Iso=2) | -0.68806 | 2.1192   | 1.97111  |
| C        | 4.35592  | -1.05977 | 1.04483  |
| C        | 3.02419  | -0.8754  | 0.70051  |
| C        | 2.66315  | -0.1022  | -0.43621 |
| C        | 3.72072  | 0.46899  | -1.19646 |
| C        | 5.04701  | 0.27853  | -0.84408 |
| C        | 5.37748  | -0.48809 | 0.27969  |
| H        | 4.60505  | -1.65733 | 1.92335  |
| H        | 2.24989  | -1.33243 | 1.31742  |
| H        | 3.46908  | 1.06829  | -2.07401 |
| H        | 5.83667  | 0.72992  | -1.44697 |
| H        | 6.42164  | -0.63756 | 0.55672  |



|          |          |          |          |
|----------|----------|----------|----------|
| C        | 1.31838  | 0.12316  | -0.83571 |
| H(Iso=2) | 1.15403  | 0.7643   | -1.7064  |
| C        | 0.08764  | -0.39086 | -0.15732 |
| H        | 0.33151  | -1.13954 | 0.61106  |
| H        | -0.55987 | -0.87612 | -0.89702 |
| N        | -0.69313 | 0.69119  | 0.44664  |
| C        | 0.0273   | 1.58328  | 1.33744  |
| C        | -1.83871 | 1.18328  | -0.12463 |
| O        | -2.18181 | 2.34361  | 0.01183  |
| N        | -2.60126 | 0.26101  | -0.87373 |
| H        | -3.2222  | 0.833    | -1.44408 |
| C        | -3.45559 | -0.7038  | -0.12241 |
| C        | -2.63272 | -1.83208 | 0.49896  |
| H        | -2.07672 | -2.38732 | -0.26928 |
| H        | -1.92582 | -1.44547 | 1.24535  |
| H        | -3.31074 | -2.53362 | 1.00591  |
| C        | -4.41843 | -1.29404 | -1.15264 |
| H        | -5.07748 | -2.03569 | -0.68031 |
| H        | -5.0515  | -0.50753 | -1.59189 |
| H        | -3.85788 | -1.78308 | -1.9619  |
| C        | -4.24204 | 0.02099  | 0.97683  |
| H        | -4.81194 | 0.86245  | 0.55619  |
| H        | -4.94319 | -0.66782 | 1.47017  |
| H        | -3.56147 | 0.42435  | 1.74196  |

## 7. Characterization of Cyanation Compounds

### 7.1 $\alpha'$ -Cyanation products

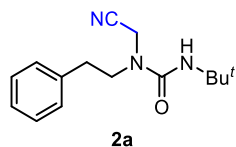

**3-(tert-Butyl)-1-(cyanomethyl)-1-phenethylurea (2a):** Prepared *via* condition A from **1a** (0.2 mmol) in 69% yield (35.8 mg) and 30:1 rr as a colorless oil.

**<sup>1</sup>H NMR** (400 MHz, Chloroform-*d*)  $\delta$  = 7.38–7.28 (m, 3H), 7.23–7.20 (m, 2H), 4.20 (s, 2H), 3.75 (s, 1H), 3.49 (t, *J* = 6.4 Hz, 2H), 2.89 (t, *J* = 6.4 Hz, 2H), 1.10 (s, 9H).

**<sup>13</sup>C NMR** (101 MHz, Chloroform-*d*)  $\delta$  = 156.0, 138.5, 129.3 (2C), 129.0 (2C), 127.2, 116.8, 50.9, 50.8, 35.0, 34.7, 28.9 (3C).

**HRMS** (ESI-TOF): [M+Na]<sup>+</sup> calcd. for C<sub>15</sub>H<sub>21</sub>N<sub>3</sub>ONa: 282.1577, found: 282.1578.

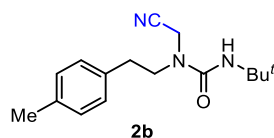

**3-(tert-Butyl)-1-(cyanomethyl)-1-(4-methylphenethyl)urea (2b):** Prepared *via* condition A from **1b** (0.2 mmol) in 70% yield (38.2 mg) and 20:1 rr as a white solid.

**<sup>1</sup>H NMR** (400 MHz, Chloroform-*d*)  $\delta$  = 7.15 (d, *J* = 7.8 Hz, 2H), 7.09 (d, *J* = 8.0 Hz, 2H), 4.20 (s, 2H), 3.73 (s, 1H), 3.46 (t, *J* = 6.3 Hz, 2H), 2.85 (t, *J* = 6.3 Hz, 2H), 2.34 (s, 3H), 1.10 (s, 9H).

**<sup>13</sup>C NMR** (101 MHz, Chloroform-*d*)  $\delta$  = 156.2, 137.0, 135.5, 130.1 (2C), 128.9 (2C), 117.0, 51.0, 50.9, 35.0, 34.3, 28.9 (3C), 21.1.

**HRMS** (ESI-TOF): [M+Na]<sup>+</sup> calcd. for C<sub>16</sub>H<sub>23</sub>N<sub>3</sub>ONa: 296.1733, found: 296.1735.

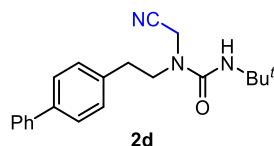

**1-(2-([1,1'-Biphenyl]-4-yl)ethyl)-3-(tert-butyl)-1-(cyanomethyl)urea (2d):** Prepared *via* condition A from **1d** (0.2 mmol) in 72% yield (48.3 mg) and 20:1 rr as a white solid.

**<sup>1</sup>H NMR** (400 MHz, Chloroform-*d*)  $\delta$  = 7.57 (t, *J* = 7.6 Hz, 4H), 7.45 (t, *J* = 7.7 Hz, 2H), 7.36 (t, *J* = 7.5 Hz, 1H), 7.30 (d, *J* = 7.9 Hz, 2H), 4.25 (s, 2H), 3.80 (s, 1H), 3.53 (t, *J* = 6.3 Hz, 2H), 2.94 (t, *J* = 6.3 Hz, 2H), 1.09 (s, 9H).

**<sup>13</sup>C NMR** (101 MHz, Chloroform-*d*)  $\delta$  = 156.1, 140.5, 140.3, 137.6, 129.5 (2C), 128.9 (2C), 128.0 (2C), 127.5, 127.0 (2C), 116.9, 50.9, 50.8, 35.0, 34.3, 28.9 (3C).

**HRMS** (ESI-TOF): [M+Na]<sup>+</sup> calcd. for C<sub>21</sub>H<sub>25</sub>N<sub>3</sub>ONa: 358.1890, found: 358.1892.

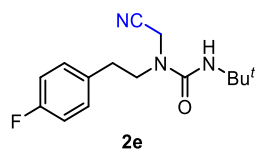

**3-(tert-Butyl)-1-(cyanomethyl)-1-(4-fluorophenethyl)urea (2e):** Prepared *via* condition A from **1e** (0.2 mmol) in 61% yield (33.8 mg) and 16:1 rr as a colorless oil.

**<sup>1</sup>H NMR** (400 MHz, Chloroform-*d*)  $\delta$  = 7.18 (t, *J* = 6.2 Hz, 2H), 7.04 (t, *J* = 8.3 Hz, 2H), 4.18 (s, 2H),

3.81 (s, 1H), 3.46 (t,  $J = 6.2$  Hz, 2H), 2.87 (t,  $J = 6.1$  Hz, 2H), 1.14 (s, 9H).

$^{13}\text{C}$  NMR (101 MHz, Chloroform- $d$ )  $\delta = 162.0$  (d,  $J = 246.0$  Hz), 155.8, 134.1 (d,  $J = 3.3$  Hz), 130.5 (d,  $J = 7.9$  Hz, 2C), 116.8, 116.1 (d,  $J = 21.3$  Hz, 2C), 51.0, 50.8, 35.1, 33.8, 28.9 (3C).

$^{19}\text{F}$  NMR (376 MHz, Chloroform- $d$ )  $\delta = -115.36$ .

HRMS (ESI-TOF):  $[\text{M}+\text{Na}]^+$  calcd. for  $\text{C}_{15}\text{H}_{20}\text{FN}_3\text{ONa}$ : 300.1483, found: 300.1483.

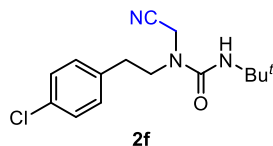

**3-(*tert*-Butyl)-1-(4-chlorophenethyl)-1-(cyanomethyl)urea (2f)**: Prepared *via* condition A from **1f** (0.2 mmol) in 62% yield (36.4 mg) and 8:1 rr as a colorless oil.

$^1\text{H}$  NMR (400 MHz, Chloroform- $d$ )  $\delta = 7.31$  (d,  $J = 7.5$  Hz, 2H), 7.14 (d,  $J = 7.6$  Hz, 2H), 4.17 (s, 2H), 3.80 (s, 1H), 3.45 (t,  $J = 6.0$  Hz, 2H), 2.86 (t,  $J = 6.0$  Hz, 2H), 1.13 (s, 9H).

$^{13}\text{C}$  NMR (101 MHz, Chloroform- $d$ )  $\delta = 155.8$ , 136.9, 133.2, 130.3 (2C), 129.4 (2C), 116.8, 51.1, 50.6, 35.1, 34.0, 28.9 (3C).

HRMS (ESI-TOF):  $[\text{M}+\text{Na}]^+$  calcd. for  $\text{C}_{15}\text{H}_{20}\text{ClN}_3\text{ONa}$ : 316.1187; found: 316.1186.

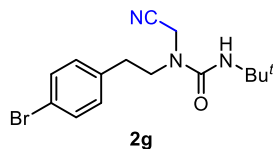

**1-(4-Bromophenethyl)-3-(*tert*-butyl)-1-(cyanomethyl)urea (2g)**: Prepared *via* condition A from **1g** (0.2 mmol) in 66% yield (44.6 mg) and 20:1 rr as a colorless oil.

$^1\text{H}$  NMR (400 MHz, Chloroform- $d$ )  $\delta = 7.44$ – $7.41$  (m, 2H), 7.08– $7.05$  (m, 2H), 3.57 (s, 2H), 3.56 (t,  $J = 7.3$  Hz, 2H), 2.82 (t,  $J = 7.3$  Hz, 2H), 1.57 (s, 9H).

$^{13}\text{C}$  NMR (101 MHz, Chloroform- $d$ )  $\delta = 170.5$ , 157.4, 137.1, 131.8 (2C), 130.3 (2C), 120.7, 58.0, 49.9, 43.7, 33.6, 28.6 (3C).

HRMS (ESI-TOF):  $[\text{M}+\text{Na}]^+$  calcd. for  $\text{C}_{15}\text{H}_{20}\text{BrN}_3\text{ONa}$ : 360.0682, found: 360.0685.

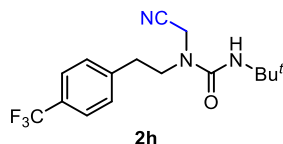

**3-(*tert*-Butyl)-1-(cyanomethyl)-1-(4-(trifluoromethyl)phenethyl)urea (2h)**: Prepared *via* condition A from **1h** (0.2 mmol) in 69% yield (45.2 mg) and 20:1 rr as a colorless oil.

$^1\text{H}$  NMR (400 MHz, Chloroform- $d$ )  $\delta = 7.61$  (d,  $J = 7.7$  Hz, 2H), 7.35 (d,  $J = 7.7$  Hz, 2H), 4.21 (s, 2H), 3.76 (s, 1H), 3.51 (t,  $J = 6.2$  Hz, 2H), 2.98 (t,  $J = 6.1$  Hz, 2H), 1.12 (s, 9H).

$^{13}\text{C}$  NMR (101 MHz, Chloroform- $d$ )  $\delta = 155.6$ , 142.6, 129.7 (q,  $J = 32.6$  Hz), 129.4 (2C), 126.1 (q,  $J = 3.7$  Hz, 2C), 124.0 (q,  $J = 272.0$  Hz), 116.7, 51.1, 50.4, 35.1, 34.5, 28.8 (3C).

$^{19}\text{F}$  NMR (376 MHz, Chloroform- $d$ )  $\delta = -62.61$ .

HRMS (ESI-TOF):  $[\text{M}+\text{Na}]^+$  calcd. for  $\text{C}_{16}\text{H}_{20}\text{F}_3\text{N}_3\text{ONa}$ : 350.1451, found: 350.1455.

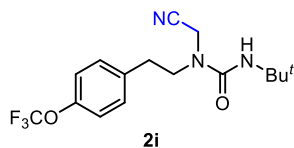

**3-(*tert*-Butyl)-1-(cyanomethyl)-1-(4-(trifluoromethoxy)phenethyl)urea (2i)**: Prepared *via* condition A

from **1i** (0.2 mmol) in 68% yield (46.7 mg) and 11:1 rr as a colorless oil.

**<sup>1</sup>H NMR** (400 MHz, Chloroform-*d*)  $\delta$  = 7.29–7.21 (m, 4H), 4.23 (s, 2H), 3.83 (s, 1H), 3.51 (t, *J* = 6.4 Hz, 2H), 2.93 (t, *J* = 6.1 Hz, 2H), 1.15 (s, 9H).

**<sup>13</sup>C NMR** (101 MHz, Chloroform-*d*)  $\delta$  = 155.8, 148.4, 137.2, 130.4 (2C), 121.8 (2C), 120.4 (q, *J* = 258.5 Hz), 116.8, 51.1, 50.6, 35.1, 33.9, 28.8 (3C).

**<sup>19</sup>F NMR** (376 MHz, Chloroform-*d*)  $\delta$  = -57.88.

**HRMS** (ESI-TOF): [M+Na]<sup>+</sup> calcd. for C<sub>16</sub>H<sub>20</sub>F<sub>3</sub>N<sub>3</sub>O<sub>2</sub>Na: 366.1400, found: 366.1398.

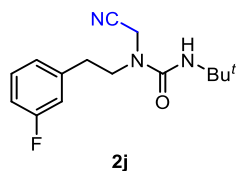

**3-(tert-Butyl)-1-(cyanomethyl)-1-(3-fluorophenethyl)urea (2j)**: Prepared *via* condition A from **1j** (0.2 mmol) in 68% yield (37.7 mg) and 20:1 rr as a colorless oil.

**<sup>1</sup>H NMR** (400 MHz, Chloroform-*d*)  $\delta$  = 7.32 (q, *J* = 7.3 Hz, 1H), 7.00 (d, *J* = 7.6 Hz, 2H), 6.93 (d, *J* = 9.4 Hz, 1H), 4.20 (s, 2H), 3.83 (s, 1H), 3.49 (t, *J* = 6.3 Hz, 2H), 2.90 (t, *J* = 6.3 Hz, 2H), 1.14 (s, 9H).

**<sup>13</sup>C NMR** (101 MHz, Chloroform-*d*)  $\delta$  = 163.2 (d, *J* = 247.6 Hz), 155.8, 141.0 (d, *J* = 7.1 Hz), 130.9 (d, *J* = 8.3 Hz), 124.7 (d, *J* = 2.9 Hz), 116.7, 115.9 (d, *J* = 21.0 Hz), 114.2 (d, *J* = 20.9 Hz), 51.0, 50.5, 35.1, 34.4, 28.9 (3C).

**<sup>19</sup>F NMR** (376 MHz, Chloroform-*d*)  $\delta$  = -111.97.

**HRMS** (ESI-TOF): [M+Na]<sup>+</sup> calcd. for C<sub>15</sub>H<sub>20</sub>FN<sub>3</sub>ONa: 300.1483, found: 300.1482.

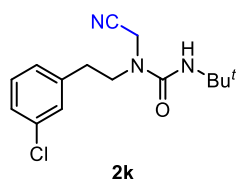

**3-(tert-Butyl)-1-(3-chlorophenethyl)-1-(cyanomethyl)urea (2k)**: Prepared *via* condition A from **1k** (0.2 mmol) in 70% yield (41.1 mg) and 20:1 rr as a colorless oil.

**<sup>1</sup>H NMR** (400 MHz, Chloroform-*d*)  $\delta$  = 7.29–7.28 (m, 2H), 7.22–7.21 (m, 1H), 7.12–7.09 (m, 1H), 4.21 (s, 2H), 3.81 (s, 1H), 3.49 (t, *J* = 6.5 Hz, 2H), 2.88 (t, *J* = 6.5 Hz, 2H), 1.15 (s, 9H).

**<sup>13</sup>C NMR** (101 MHz, Chloroform-*d*)  $\delta$  = 155.8, 140.5, 135.1, 130.6, 129.0, 127.4, 127.3, 116.7, 51.0, 50.5, 35.1, 34.3, 28.9 (3C).

**HRMS** (ESI-TOF): [M+Na]<sup>+</sup> calcd. for C<sub>15</sub>H<sub>20</sub>ClN<sub>3</sub>ONa: 316.1187, found: 316.1185.

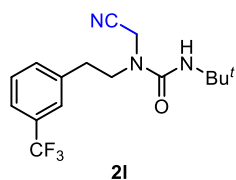

**3-(tert-Butyl)-1-(cyanomethyl)-1-(3-(trifluoromethyl)phenethyl)urea (2l)**: Prepared *via* condition A from **1l** (0.2 mmol) in 65% yield (45.2 mg) and 49:1 rr as a colorless oil.

**<sup>1</sup>H NMR** (400 MHz, Chloroform-*d*)  $\delta$  = 7.56 (d, *J* = 7.6 Hz, 1H), 7.49 (d, *J* = 8.4 Hz, 2H), 7.42 (d, *J* = 7.4 Hz, 1H), 4.21 (s, 2H), 3.81 (s, 1H), 3.51 (t, *J* = 6.4 Hz, 2H), 2.98 (t, *J* = 6.4 Hz, 2H), 1.13 (s, 9H).

**<sup>13</sup>C NMR** (101 MHz, Chloroform-*d*)  $\delta$  = 155.6, 139.4, 132.5, 131.6 (q, *J* = 32.4 Hz), 129.7, 125.5 (q, *J* = 3.7 Hz), 124.1 (q, *J* = 3.7 Hz), 123.9 (q, *J* = 273.5 Hz), 116.7, 51.1, 50.4, 35.2, 34.4, 28.9 (3C).

$^{19}\text{F}$  NMR (376 MHz, Chloroform-*d*)  $\delta = -62.83$ .

HRMS (ESI-TOF):  $[\text{M}+\text{Na}]^+$  calcd. for  $\text{C}_{16}\text{H}_{20}\text{F}_3\text{N}_3\text{ONa}$ : 350.1451, found: 350.1457.

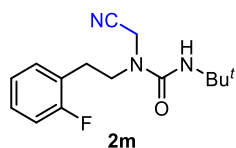

**3-(tert-Butyl)-1-(cyanomethyl)-1-(2-fluorophenethyl)urea (2m):** Prepared *via* condition A from **1m** (0.2 mmol) in 71% yield (39.4 mg) and 7:1 rr as a colorless oil.

$^1\text{H}$  NMR (400 MHz, Chloroform-*d*)  $\delta = 7.31\text{--}7.26$  (m, 1H),  $7.25\text{--}7.20$  (m, 1H), 7.12 (td,  $J = 7.5, 1.2$  Hz, 1H), 7.07 (ddd,  $J = 9.4, 8.2, 1.0$  Hz, 1H), 4.29 (s, 1H), 4.27 (s, 2H), 3.46 (t,  $J = 7.3$  Hz, 2H), 2.97 (t,  $J = 7.1$  Hz, 2H), 1.23 (s, 9H).

$^{13}\text{C}$  NMR (101 MHz, Chloroform-*d*)  $\delta = 161.3$  (d,  $J = 244.1$  Hz), 155.5, 131.4 (d,  $J = 4.7$  Hz), 129.2 (d,  $J = 8.3$  Hz), 124.9 (d,  $J = 3.7$  Hz), 124.8 (d,  $J = 16.0$  Hz), 116.8, 115.7 (d,  $J = 21.8$  Hz), 51.1, 48.6, 34.9, 29.0 (3C), 28.4.

$^{19}\text{F}$  NMR (376 MHz, Chloroform-*d*)  $\delta = -118.97$ .

HRMS (ESI-TOF):  $[\text{M}+\text{Na}]^+$  calcd. for  $\text{C}_{15}\text{H}_{20}\text{FN}_3\text{ONa}$ : 300.1483, found: 300.1480.

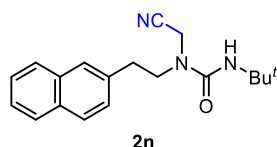

**3-(tert-Butyl)-1-(cyanomethyl)-1-(2-(naphthalen-2-yl)ethyl)urea (2n):** Prepared *via* condition A from **1n** (0.2 mmol) in 65% yield (40.2 mg) and 18:1 rr as a white solid.

$^1\text{H}$  NMR (400 MHz, Chloroform-*d*)  $\delta = 7.85\text{--}7.78$  (m, 3H), 7.67 (s, 1H),  $7.52\text{--}7.45$  (m, 2H), 7.33 (dd,  $J = 8.4, 1.6$  Hz, 1H), 4.22 (s, 2H), 3.68 (s, 1H), 3.56 (t,  $J = 6.3$  Hz, 2H), 3.05 (t,  $J = 6.3$  Hz, 2H), 0.91 (s, 9H).

$^{13}\text{C}$  NMR (101 MHz, Chloroform-*d*)  $\delta = 156.0, 135.9, 133.7, 132.4, 129.1, 127.7, 127.6, 127.6, 126.9, 126.6, 126.1, 116.9, 50.8, 50.7, 35.1, 34.9, 28.7$  (3C).

HRMS (ESI-TOF):  $[\text{M}+\text{Na}]^+$  calcd. for  $\text{C}_{19}\text{H}_{23}\text{N}_3\text{ONa}$ : 332.1733, found: 332.1734.

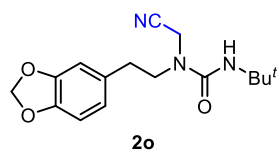

**1-(2-(Benzo[d][1,3]dioxol-5-yl)ethyl)-3-(tert-butyl)-1-(cyanomethyl)urea (2o):** Prepared *via* condition A from **1o** (0.2 mmol) in 58% yield (35.2 mg) and 17:1 rr as a brown yellow oil.

$^1\text{H}$  NMR (400 MHz, Chloroform-*d*)  $\delta = 6.78$  (d,  $J = 7.8$  Hz, 1H),  $6.68\text{--}6.64$  (m, 2H), 5.94 (s, 2H), 4.19 (s, 2H), 3.86 (s, 1H), 3.43 (t,  $J = 6.0$  Hz, 2H), 2.80 (t,  $J = 6.0$  Hz, 2H), 1.14 (s, 9H).

$^{13}\text{C}$  NMR (101 MHz, Chloroform-*d*)  $\delta = 156.0, 148.3, 146.8, 132.1, 121.9, 116.9, 109.2, 109.0, 101.2, 50.9, 50.9, 35.0, 34.4, 29.0$  (3C).

HRMS (ESI-TOF):  $[\text{M}+\text{Na}]^+$  calcd. for  $\text{C}_{16}\text{H}_{21}\text{N}_3\text{O}_3\text{Na}$ : 326.1475, found: 326.1471.

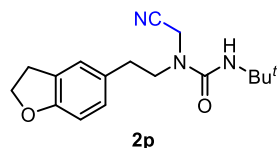

**3-(tert-Butyl)-1-(cyanomethyl)-1-(2-(2,3-dihydrobenzofuran-5-yl)ethyl)urea (2p):** Prepared *via*

condition A from **1p** (0.2 mmol) in 55% yield (33.2 mg) and 10:1 rr as a colorless oil.

**<sup>1</sup>H NMR** (400 MHz, Chloroform-*d*)  $\delta$  = 7.03 (s, 1H), 6.94 (d, *J* = 8.1 Hz, 1H), 6.76 (d, *J* = 8.1 Hz, 1H), 4.56 (t, *J* = 8.7 Hz, 2H), 4.21 (s, 2H), 3.76 (s, 1H), 3.44 (t, *J* = 6.2 Hz, 2H), 3.18 (t, *J* = 8.7 Hz, 2H), 2.81 (t, *J* = 6.2 Hz, 2H), 1.11 (s, 9H).

**<sup>13</sup>C NMR** (101 MHz, Chloroform-*d*)  $\delta$  = 159.4, 156.2, 130.3, 128.3, 128.1, 125.7, 116.9, 110.0, 71.4, 51.3, 50.8, 35.0, 34.1, 29.7, 28.9 (3C).

**HRMS** (ESI-TOF): [M+Na]<sup>+</sup> calcd. for C<sub>17</sub>H<sub>23</sub>N<sub>3</sub>O<sub>2</sub>Na: 324.1682, found: 324.1680.

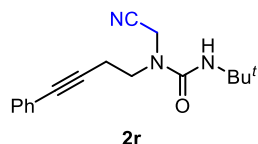

**3-(tert-Butyl)-1-(cyanomethyl)-1-(4-phenylbut-3-yn-1-yl)urea (2r)**: Prepared *via* condition A from **1v** (0.2 mmol) in 57% yield (32.3 mg) and 10:1 rr as a colorless oil.

**<sup>1</sup>H NMR** (400 MHz, Chloroform-*d*)  $\delta$  = 7.41–7.38 (m, 2H), 7.32–7.29 (m, 3H), 4.88 (s, 1H), 4.31 (s, 2H), 3.53 (t, *J* = 6.3 Hz, 2H), 2.74 (t, *J* = 6.3 Hz, 2H), 1.26 (s, 9H).

**<sup>13</sup>C NMR** (101 MHz, Chloroform-*d*)  $\delta$  = 156.2, 131.7, 128.5 (2C), 128.4 (2C), 122.6, 116.6, 86.4, 83.4, 51.2, 47.6, 35.1, 29.1 (3C), 19.6.

**HRMS** (ESI-TOF): [M+Na]<sup>+</sup> calcd. for C<sub>17</sub>H<sub>21</sub>N<sub>3</sub>O<sub>2</sub>Na: 306.1577, found: 306.1578.

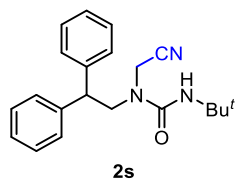

**3-(tert-Butyl)-1-(cyanomethyl)-1-(2,2-diphenylethyl)urea (2s)**: Prepared *via* condition A from **1r** (0.2 mmol) in 69% yield (46.3 mg) as a colorless oil.

**<sup>1</sup>H NMR** (400 MHz, Chloroform-*d*)  $\delta$  = 7.40–7.36 (m, 4H), 7.33–7.27 (m, 6H), 4.26 (t, *J* = 7.4 Hz, 1H), 4.14 (s, 2H), 3.90 (d, *J* = 7.4 Hz, 2H), 3.71 (s, 1H), 1.11 (s, 9H).

**<sup>13</sup>C NMR** (101 MHz, Chloroform-*d*)  $\delta$  = 156.1, 141.7 (2C), 129.2 (4C), 128.0 (4C), 127.4 (2C), 116.8, 54.8, 50.9, 49.5, 35.3, 28.8 (3C).

**HRMS** (ESI-TOF): [M+Na]<sup>+</sup> calcd. for C<sub>21</sub>H<sub>25</sub>N<sub>3</sub>O<sub>2</sub>Na: 358.1890, found: 358.1892.

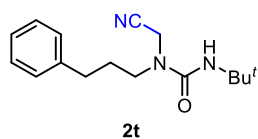

**3-(tert-Butyl)-1-(cyanomethyl)-1-(3-phenylpropyl)urea (2t)**: Prepared *via* condition A from **1s** (0.2 mmol) in 72% yield (39.4 mg) and 9:1 rr as a colorless oil.

**<sup>1</sup>H NMR** (400 MHz, Chloroform-*d*)  $\delta$  = 7.33–7.28 (m, 2H), 7.24–7.15 (m, 3H), 4.21 (s, 2H), 4.14 (s, 1H), 3.17 (t, *J* = 7.6 Hz, 2H), 2.66 (t, *J* = 7.1 Hz, 2H), 1.97 (p, *J* = 7.2 Hz, 2H), 1.24 (s, 9H).

**<sup>13</sup>C NMR** (101 MHz, Chloroform-*d*)  $\delta$  = 155.6, 140.3, 128.8 (2C), 128.3 (2C), 126.5, 116.8, 51.2, 47.1, 34.8, 32.4, 29.2, 28.8 (3C).

**HRMS** (ESI-TOF): [M+Na]<sup>+</sup> calcd. for C<sub>16</sub>H<sub>23</sub>N<sub>3</sub>O<sub>2</sub>Na: 296.1733, found: 296.1737.

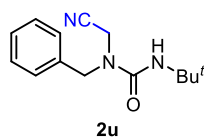

**1-Benzyl-3-(*tert*-butyl)-1-(cyanomethyl)urea (2u):** Prepared *via* condition A from **1t** (0.2 mmol) in 43% yield (21.1 mg) and 1:1 rr as a colorless oil.

**<sup>1</sup>H NMR** (400 MHz, Chloroform-*d*)  $\delta$  = 7.40–7.30 (m, 4H), 7.26–7.24 (m, 1H), 4.46 (s, 2H), 4.41 (s, 1H), 4.31 (s, 2H), 1.25 (s, 9H).

**<sup>13</sup>C NMR** (101 MHz, Chloroform-*d*)  $\delta$  = 156.1, 135.6, 129.3, 128.4, 126.8, 116.4, 51.7, 51.4, 35.6, 29.1 (3C).

**HRMS** (ESI-TOF): [M+Na]<sup>+</sup> calcd. for C<sub>14</sub>H<sub>19</sub>N<sub>3</sub>ONa: 268.1420, found: 268.1424.

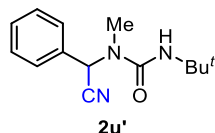

**3-(*tert*-Butyl)-1-(cyano(phenyl)methyl)-1-methylurea (2u')**: Prepared *via* condition A from **1t** (0.2 mmol) in 40% yield (19.6 mg) and 1:1 rr as a colorless oil.

**<sup>1</sup>H NMR** (400 MHz, Chloroform-*d*)  $\delta$  = 7.44–7.34 (m, 5H), 6.88 (s, 1H), 4.49 (s, 1H), 2.69 (s, 3H), 1.39 (s, 9H).

**<sup>13</sup>C NMR** (101 MHz, Chloroform-*d*)  $\delta$  = 156.1, 133.1, 129.1 (2C), 129.0 (2C), 127.0, 117.0, 51.5, 49.8, 30.4, 29.3 (3C).

**HRMS** (ESI-TOF): [M+Na]<sup>+</sup> calcd. for C<sub>14</sub>H<sub>19</sub>N<sub>3</sub>ONa: 268.1420, found: 268.1423.

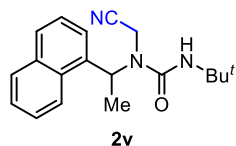

**3-(*tert*-Butyl)-1-(cyanomethyl)-1-(1-(naphthalen-1-yl)ethyl)urea (2v):** Prepared *via* condition A from **1u** (0.2 mmol) in 58% yield (35.9 mg) and 15:1 rr as a colorless oil.

**<sup>1</sup>H NMR** (400 MHz, Chloroform-*d*)  $\delta$  = 7.97–7.95 (m, 1H), 7.90–7.85 (m, 2H), 7.59–7.48 (m, 4H), 5.87 (q, *J* = 6.9 Hz, 1H), 4.45 (s, 1H), 4.05 (d, *J* = 18.1 Hz, 1H), 3.65 (d, *J* = 18.1 Hz, 1H), 1.79 (d, *J* = 7.0 Hz, 3H), 1.34 (s, 9H).

**<sup>13</sup>C NMR** (101 MHz, Chloroform-*d*)  $\delta$  = 155.4, 135.1, 134.0, 131.3, 129.5, 129.1, 127.1, 126.3, 125.2, 124.5, 122.9, 116.9, 51.6, 51.2, 30.6, 29.3 (3C), 17.5.

**HRMS** (ESI-TOF): [M+Na]<sup>+</sup> calcd. for C<sub>19</sub>H<sub>23</sub>N<sub>3</sub>ONa: 332.1733, found: 332.1734.

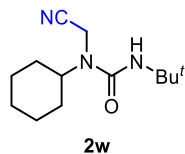

**3-(*tert*-Butyl)-1-(cyanomethyl)-1-cyclohexylurea (2w):** Prepared *via* condition A from **1w** (0.2 mmol) in 72% yield (34.2 mg) as a white solid.

**<sup>1</sup>H NMR** (400 MHz, Chloroform-*d*)  $\delta$  = 4.38 (s, 1H), 4.11 (s, 2H), 3.44–3.35 (m, 1H), 1.84 (d, *J* = 10.6 Hz, 4H), 1.68–1.65 (m, 1H), 1.49–1.39 (m, 2H), 1.33 (s, 9H), 1.30–1.18 (m, 2H), 1.16–1.05 (m, 1H).

**<sup>13</sup>C NMR** (101 MHz, Chloroform-*d*)  $\delta$  = 155.6, 117.9, 56.3, 51.3, 31.1 (2C), 29.7, 29.3 (3C), 25.8 (2C), 25.2.

**HRMS** (ESI-TOF): [M+Na]<sup>+</sup> calcd. for C<sub>13</sub>H<sub>23</sub>N<sub>3</sub>ONa: 260.1733, found: 260.1734.

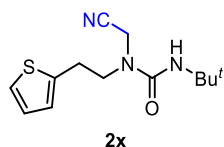

**3-(tert-Butyl)-1-(cyanomethyl)-1-(2-(thiophen-2-yl)ethyl)urea (2x):** Prepared *via* condition A from **1x** (0.2 mmol) in 57% yield (30.3 mg) and 15:1 rr as a colorless oil.

**<sup>1</sup>H NMR** (400 MHz, Chloroform-*d*)  $\delta$  = 7.25 (d,  $J$  = 4.7 Hz, 1H), 7.00–6.83 (m, 2H), 4.24 (s, 2H), 3.95 (s, 1H), 3.53 (t,  $J$  = 5.6 Hz, 2H), 3.14 (t,  $J$  = 5.5 Hz, 2H), 1.18 (s, 9H).

**<sup>13</sup>C NMR** (101 MHz, Chloroform-*d*)  $\delta$  = 156.0, 140.1, 127.8, 126.5, 125.0, 116.8, 51.0, 50.8, 34.9, 28.9 (3C), 28.7.

**HRMS** (ESI-TOF):  $[M+Na]^+$  calcd. for C<sub>13</sub>H<sub>19</sub>N<sub>3</sub>OSNa: 288.1141, found: 288.1141.

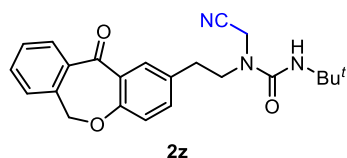

**3-(tert-Butyl)-1-(cyanomethyl)-1-(2-(11-oxo-6,11-dihydrodibenzo[*b,e*]oxepin-2-yl)ethyl)urea (2z):** Prepared *via* condition A from **1z** (0.2 mmol) in 58% yield (45.4 mg) and 17:1 rr as a colorless oil.

**<sup>1</sup>H NMR** (400 MHz, Chloroform-*d*)  $\delta$  = 8.07 (d,  $J$  = 2.2 Hz, 1H), 7.87 (dd,  $J$  = 7.7, 1.4 Hz, 1H), 7.57 (td,  $J$  = 7.5, 1.4 Hz, 1H), 7.47 (td,  $J$  = 7.6, 1.3 Hz, 1H), 7.35 (ddd,  $J$  = 16.6, 7.9, 1.8 Hz, 2H), 7.04 (d,  $J$  = 8.3 Hz, 1H), 5.18 (s, 2H), 4.22 (s, 2H), 3.98 (s, 1H), 3.50 (t,  $J$  = 6.6 Hz, 2H), 2.92 (t,  $J$  = 6.6 Hz, 2H), 1.14 (s, 9H).

**<sup>13</sup>C NMR** (101 MHz, Chloroform-*d*)  $\delta$  = 190.8, 160.5, 155.7, 140.3, 136.2, 135.5, 133.0, 132.0, 131.5, 129.5, 129.4, 127.9, 125.6, 121.7, 116.7, 73.7, 51.0, 50.4, 35.1, 33.6, 29.0 (3C).

**HRMS** (ESI-TOF):  $[M+Na]^+$  calcd. for C<sub>23</sub>H<sub>25</sub>N<sub>3</sub>O<sub>3</sub>Na: 414.1788, found: 414.1788.

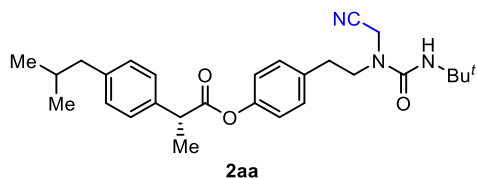

**4-(2-(3-(tert-Butyl)-1-(cyanomethyl)ureido)ethyl)phenyl (*R*)-2-(4-isobutylphenyl)propanoate (2aa):** Prepared *via* condition A from **1aa** (0.2 mmol) in 61% yield (56.6 mg) and 12:1 rr as a colorless oil.

**<sup>1</sup>H NMR** (400 MHz, Chloroform-*d*)  $\delta$  = 7.28 (d,  $J$  = 7.9 Hz, 2H), 7.18–7.13 (m, 4H), 6.98 (d,  $J$  = 7.8 Hz, 2H), 4.17 (s, 2H), 3.96–3.90 (m, 1H), 3.86 (s, 1H), 3.46 (t,  $J$  = 6.3 Hz, 2H), 2.88 (t,  $J$  = 6.0 Hz, 2H), 2.47 (d,  $J$  = 7.1 Hz, 2H), 1.91–1.81 (m, 1H), 1.60 (d,  $J$  = 7.1 Hz, 3H), 1.16 (s, 9H), 0.91 (d,  $J$  = 6.6 Hz, 6H).

**<sup>13</sup>C NMR** (101 MHz, Chloroform-*d*)  $\delta$  = 173.1, 155.8, 150.1, 140.9, 137.1, 135.7, 129.8 (2C), 129.5 (2C), 127.2 (2C), 122.2 (2C), 116.8, 51.1, 50.6, 45.2, 45.0, 35.2, 34.0, 30.2 (3C), 29.0, 22.4 (2C), 18.5.

**HRMS** (ESI-TOF):  $[M+Na]^+$  calcd. for C<sub>28</sub>H<sub>37</sub>N<sub>3</sub>O<sub>3</sub>Na: 486.2727, found: 486.2729.

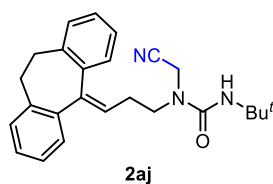

**3-(tert-Butyl)-1-(3-(10,11-dihydro-5H-dibenzo[*a,d*][7]annulen-5-ylidene)propyl)-1-methylurea (2aj):** Prepared *via* condition A from **1aj** (0.2 mmol) in 62% yield (48.1 mg) and 20:1 rr as a colorless



oil.

$^1\text{H NMR}$  (400 MHz, Chloroform-*d*)  $\delta$  = 7.27–7.14 (m, 6H), 7.09–7.04 (m, 2H), 5.83 (t,  $J$  = 7.5 Hz, 1H), 4.22 (s, 1H), 4.20–4.01 (m, 2H), 3.37–3.23 (m, 4H), 3.00–2.94 (m, 1H), 2.79 (d,  $J$  = 11.4 Hz, 1H), 2.50–2.41 (m, 2H), 1.21 (s, 9H).

$^{13}\text{C NMR}$  (101 MHz, Chloroform-*d*)  $\delta$  = 155.6, 146.6, 140.3, 139.4, 139.3, 137.0, 130.3, 128.3 (2C), 128.0, 127.8, 127.6, 126.2, 126.1, 125.9, 116.6, 51.2, 47.8, 34.6, 33.8, 31.9, 29.1 (3C), 28.0.

HRMS (ESI-TOF):  $[\text{M}+\text{Na}]^+$  calcd. for  $\text{C}_{25}\text{H}_{29}\text{N}_3\text{ONa}$ : 410.2203; found: 410.2204.

## 7.2 $\beta$ -Cyanation products

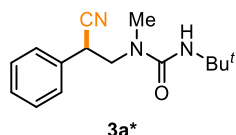

**3-(*tert*-Butyl)-1-(2-cyano-2-phenylethyl)-1-methylurea (3a\*)**: Prepared *via* condition B from **1a** (0.2 mmol) in 68% yield (35.3 mg) and 97:3 er as a colorless oil.

$^1\text{H NMR}$  (400 MHz, Chloroform-*d*)  $\delta$  = 7.41–7.32 (m, 5H), 4.37 (dd,  $J$  = 9.0, 6.3 Hz, 1H), 4.24 (s, 1H), 3.87 (dd,  $J$  = 13.8, 6.3 Hz, 1H), 3.43 (dd,  $J$  = 13.9, 9.0 Hz, 1H), 2.93 (s, 3H), 1.37 (s, 9H).

$^{13}\text{C NMR}$  (101 MHz, Chloroform-*d*)  $\delta$  = 156.8, 133.4, 129.2 (2C), 128.4, 127.7 (2C), 120.4, 55.4, 51.0, 37.2, 36.9, 29.4 (3C).

HRMS (ESI-TOF):  $[\text{M}+\text{Na}]^+$  calcd. for  $\text{C}_{15}\text{H}_{21}\text{N}_3\text{ONa}$ : 282.1577, found: 282.1578.

**Chiral HPLC**: Chiralcel AD-H column, hexane:*i*PrOH (95:5), 1.0 mL/min, 220 nm,  $t_{\text{R}}$  (minor) = 9.7 min,  $t_{\text{R}}$  (major) = 10.9 min.

$[\alpha]_{\text{D}}^{21}$  = -11.5 ( $c$  = 0.8,  $\text{CH}_2\text{Cl}_2$ ).

### Racemic sample:

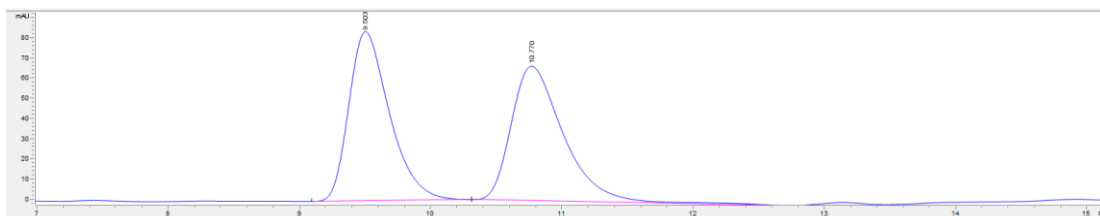

| # | 时间    | 峰面积    | 峰高   | 峰宽     | 对称因子  | 峰面积 %  | 类型 |
|---|-------|--------|------|--------|-------|--------|----|
| 1 | 9.503 | 1799.6 | 83.7 | 0.327  | 0.653 | 49.278 | BB |
| 2 | 10.77 | 1852.3 | 66.5 | 0.4229 | 0.586 | 50.722 | BB |

### Enriched sample:

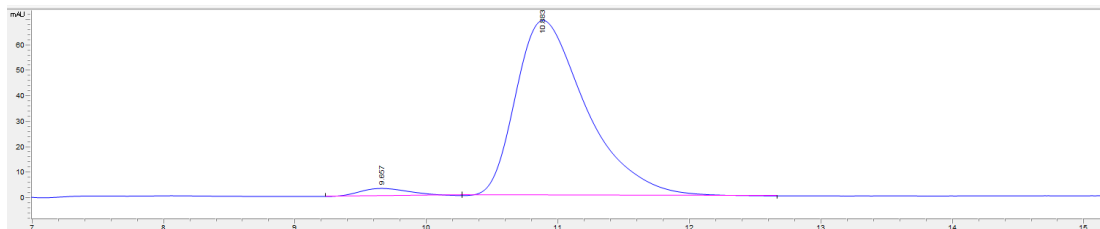

| # | 时间     | 峰面积  | 峰高   | 峰宽     | 对称因子  | 峰面积 %  | 类型 |
|---|--------|------|------|--------|-------|--------|----|
| 1 | 9.657  | 80.9 | 3    | 0.4133 | 0.748 | 3.037  | BB |
| 2 | 10.883 | 2583 | 69.1 | 0.5681 | 0.587 | 96.963 | BB |

### Enriched sample:

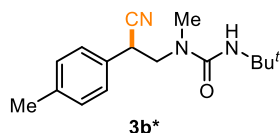

**3-(tert-Butyl)-1-(2-cyano-2-(p-tolyl)ethyl)-1-methylurea (3b\*)**: Prepared *via* condition B from **1b** (0.2 mmol) in 74% yield (40.5 mg) and 96:4 er as a white solid.

<sup>1</sup>H NMR (400 MHz, Chloroform-*d*)  $\delta$  = 7.27–7.25 (m, 2H), 7.20 (d,  $J$  = 7.9 Hz, 2H), 4.31 (dd,  $J$  = 9.0, 6.4 Hz, 1H), 4.22 (s, 1H), 3.82 (dd,  $J$  = 13.9, 6.4 Hz, 1H), 3.41 (dd,  $J$  = 13.9, 9.0 Hz, 1H), 2.92 (s, 3H), 2.36 (s, 3H), 1.36 (s, 9H).

<sup>13</sup>C NMR (101 MHz, Chloroform-*d*)  $\delta$  = 156.9, 138.2, 130.3 (2C), 129.8 (2C), 127.5, 120.6, 55.4, 51.0, 36.8, 36.8, 29.4 (3C), 21.1.

HRMS (ESI-TOF):  $[M+Na]^+$  calcd. for C<sub>16</sub>H<sub>23</sub>N<sub>3</sub>ONa: 296.1733, found: 296.1735.

Chiral HPLC: Chiralcel IB column, hexane:*i*PrOH (95:5), 1.0 mL/min, 220 nm,  $t_R$  (major) = 12.0 min,  $t_R$  (minor) = 15.7 min.

$[\alpha]_D^{21}$  = -9.3 (c = 0.8, CH<sub>2</sub>Cl<sub>2</sub>).

**Racemic sample:**

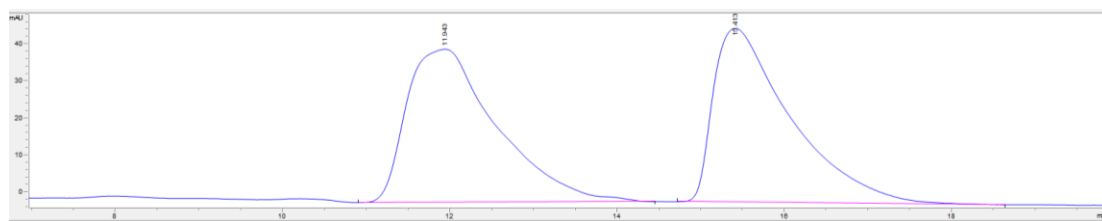

| # | 时间     | 峰面积    | 峰高   | 峰宽     | 对称因子  | 峰面积 %  | 类型 |
|---|--------|--------|------|--------|-------|--------|----|
| 1 | 11.943 | 3087.6 | 41.3 | 0.9746 | 0.678 | 50.619 | BB |
| 2 | 15.413 | 3012.1 | 46.9 | 0.9118 | 0.364 | 49.381 | BB |

**Enriched sample:**

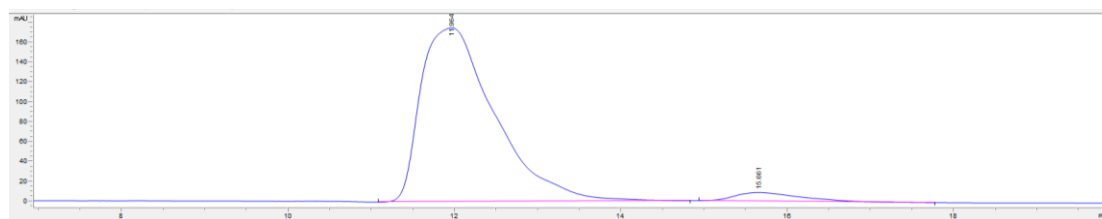

| # | 时间     | 峰面积     | 峰高    | 峰宽     | 对称因子  | 峰面积 %  | 类型 |
|---|--------|---------|-------|--------|-------|--------|----|
| 1 | 11.964 | 10862.9 | 175.7 | 0.9272 | 0.634 | 95.823 | BB |
| 2 | 15.661 | 473.5   | 8.6   | 0.6709 | 0.553 | 4.177  | BB |

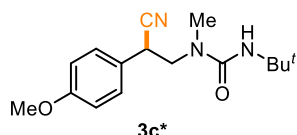

**3-(tert-Butyl)-1-(2-cyano-2-(4-methoxyphenyl)ethyl)-1-methylurea (3c\*)**: Prepared *via* condition B from **1c** (0.2 mmol) in 71% yield (41.1 mg) and 95:5 er as a white solid.

<sup>1</sup>H NMR (400 MHz, Chloroform-*d*)  $\delta$  = 7.30–7.27 (m, 2H), 6.90–6.86 (m, 2H), 4.29 (dd,  $J$  = 8.9, 6.4 Hz, 1H), 4.17 (s, 1H), 3.80 (s, 3H), 3.77 (dd, 1H), 3.41 (dd,  $J$  = 13.9, 8.9 Hz, 1H), 2.90 (s, 3H), 1.35 (s, 9H).

$^{13}\text{C}$  NMR (101 MHz, Chloroform-*d*)  $\delta$  = 159.6, 156.9, 128.8 (2C), 125.3, 120.6, 114.5 (2C), 55.4, 55.3, 50.9, 36.8, 36.3, 29.4 (3C).

HRMS (ESI-TOF):  $[\text{M}+\text{Na}]^+$  calcd. for  $\text{C}_{16}\text{H}_{23}\text{N}_3\text{O}_2\text{Na}$ : 312.1682, found: 312.1680.

Chiral HPLC: Chiralcel AD-H column, hexane:*i*PrOH (95:5), 1.0 mL/min, 220 nm,  $t_{\text{R}}$  (minor) = 13.1 min,  $t_{\text{R}}$  (major) = 15.1 min.

$[\alpha]_{\text{D}}^{21} = -7.4$  ( $c = 0.5$ ,  $\text{CH}_2\text{Cl}_2$ ).

Racemic sample:

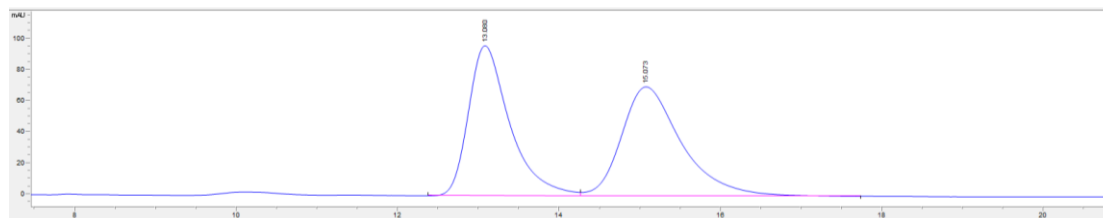

| # | 时间     | 峰面积    | 峰高   | 峰宽     | 对称因子  | 峰面积 %  | 类型 |
|---|--------|--------|------|--------|-------|--------|----|
| 1 | 13.08  | 3451.2 | 96.8 | 0.528  | 0.626 | 48.668 | BV |
| 2 | 15.073 | 3640.1 | 70.4 | 0.7756 | 0.647 | 51.332 | VB |

Enriched sample:

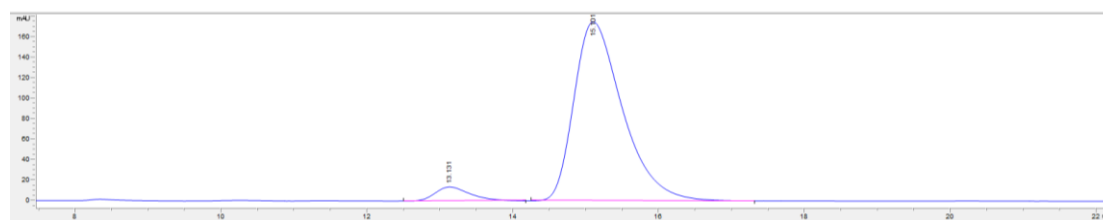

| # | 时间     | 峰面积    | 峰高    | 峰宽     | 对称因子  | 峰面积 %  | 类型 |
|---|--------|--------|-------|--------|-------|--------|----|
| 1 | 13.131 | 451    | 13.6  | 0.503  | 0.671 | 5.283  | BB |
| 2 | 15.101 | 8086.2 | 174.7 | 0.7001 | 0.618 | 94.717 | BB |

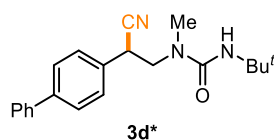

1-(2-([1,1'-Biphenyl]-4-yl)-2-cyanoethyl)-3-(*tert*-butyl)-1-methylurea (**3d\***): Prepared *via* condition B from **1d** (0.2 mmol) in 65% yield (43.6 mg) and 97:3 er as a white solid.

$^1\text{H}$  NMR (400 MHz, Chloroform-*d*)  $\delta$  = 7.61–7.56 (m, 4H), 7.44 (dd,  $J = 14.3, 7.9$  Hz, 4H), 7.35 (t,  $J = 7.3$  Hz, 1H), 4.39 (dd,  $J = 8.9, 6.3$  Hz, 1H), 4.26 (s, 1H), 3.88 (dd,  $J = 13.9, 6.3$  Hz, 1H), 3.45 (dd,  $J = 13.9, 9.0$  Hz, 1H), 2.93 (s, 3H), 1.35 (s, 9H).

$^{13}\text{C}$  NMR (101 MHz, Chloroform-*d*)  $\delta$  = 156.9, 141.4, 140.2, 132.3, 128.9 (2C), 128.1 (2C), 127.8 (2C), 127.7, 127.1 (2C), 120.4, 55.3, 51.0, 36.9, 36.8, 29.4 (3C).

HRMS (ESI-TOF):  $[\text{M}+\text{Na}]^+$  calcd. for  $\text{C}_{21}\text{H}_{25}\text{N}_3\text{ONa}$ : 358.1890, found: 358.1885.

Chiral HPLC: Chiralcel IF column, hexane:*i*PrOH (95:5), 1.0 mL/min, 254 nm,  $t_{\text{R}}$  (minor) = 21.5 min,  $t_{\text{R}}$  (major) = 26.6 min.

$[\alpha]_{\text{D}}^{21} = -26.8$  ( $c = 0.8$ ,  $\text{CH}_2\text{Cl}_2$ ).

Racemic sample:

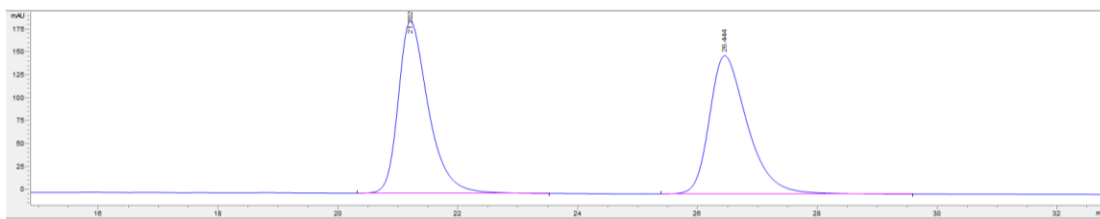

| # | 时间     | 峰面积    | 峰高    | 峰宽     | 对称因子  | 峰面积 %  | 类型 |
|---|--------|--------|-------|--------|-------|--------|----|
| 1 | 21.202 | 6570   | 188.3 | 0.5251 | 0.639 | 49.687 | BB |
| 2 | 26.444 | 6652.7 | 151.1 | 0.6637 | 0.632 | 50.313 | BB |

Enriched sample:

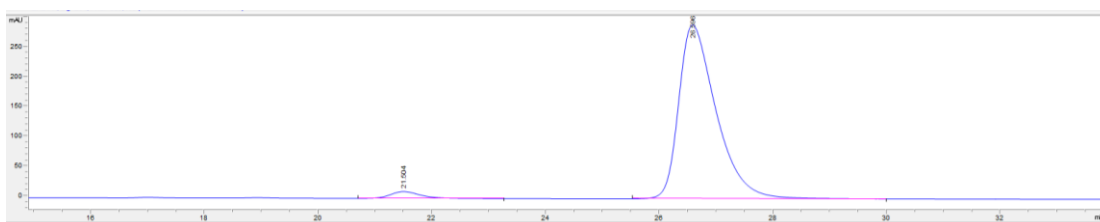

| # | 时间     | 峰面积     | 峰高    | 峰宽     | 对称因子  | 峰面积 %  | 类型 |
|---|--------|---------|-------|--------|-------|--------|----|
| 1 | 21.504 | 420.8   | 11.5  | 0.5405 | 0.727 | 3.071  | BB |
| 2 | 26.596 | 13279.5 | 290.4 | 0.6935 | 0.554 | 96.929 | BB |

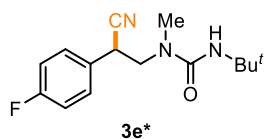

**3-(tert-Butyl)-1-(2-cyano-2-(4-fluorophenyl)ethyl)-1-methylurea (3e\*):** Prepared *via* condition B from **1e** (0.2 mmol) in 60% yield (33.3 mg) and 95:5 er as a colorless oil.

**<sup>1</sup>H NMR** (400 MHz, Chloroform-*d*)  $\delta$  = 7.38–7.35 (m, 2H), 7.09–7.05 (m, 2H), 4.34 (ddd,  $J$  = 8.7, 6.2, 2.0 Hz, 1H), 4.25 (s, 1H), 3.82 (ddd,  $J$  = 13.8, 6.2, 2.1 Hz, 1H), 3.38 (ddd,  $J$  = 13.8, 9.1, 2.0 Hz, 1H), 2.91 (d,  $J$  = 2.0 Hz, 3H), 1.35 (d,  $J$  = 2.0 Hz, 9H).

**<sup>13</sup>C NMR** (101 MHz, Chloroform-*d*)  $\delta$  = 162.6 (d,  $J$  = 247.6 Hz), 156.8, 129.4 (d,  $J$  = 8.3 Hz, 2C), 129.2 (d,  $J$  = 3.3 Hz), 120.3, 116.1 (d,  $J$  = 21.9 Hz, 2C), 55.4, 51.0, 36.9, 36.4, 29.4 (3C).

**<sup>19</sup>F NMR** (376 MHz, Chloroform-*d*)  $\delta$  = -113.37.

**HRMS** (ESI-TOF):  $[M+Na]^+$  calcd. for C<sub>15</sub>H<sub>20</sub>FN<sub>3</sub>ONa: 300.1483, found: 300.1485.

**Chiral HPLC:** Chiralcel AD-H column, hexane:*i*PrOH (95:5), 1.0 mL/min, 220 nm,  $t_R$  (minor) = 9.5 min,  $t_R$  (major) = 12.9 min.

$[\alpha]_D^{21}$  = -13.4 ( $c$  = 1.0, CH<sub>2</sub>Cl<sub>2</sub>).

**Racemic sample:**

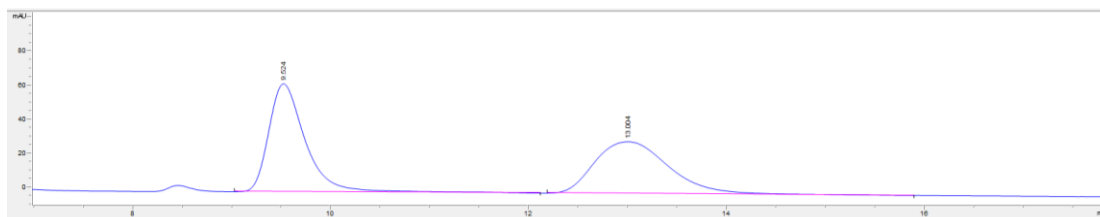

| # | 时间     | 峰面积    | 峰高   | 峰宽     | 对称因子  | 峰面积 %  | 类型 |
|---|--------|--------|------|--------|-------|--------|----|
| 1 | 9.524  | 1656.7 | 63.7 | 0.3894 | 0.609 | 50.681 | BB |
| 2 | 13.004 | 1612.2 | 30.7 | 0.8276 | 0.743 | 49.319 | BB |

Enriched sample:

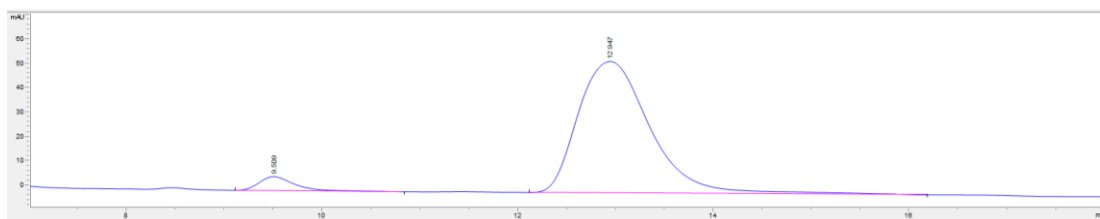

| # | 时间     | 峰面积   | 峰高   | 峰宽     | 对称因子  | 峰面积 %  | 类型 |
|---|--------|-------|------|--------|-------|--------|----|
| 1 | 9.509  | 143.1 | 5.7  | 0.3662 | 0.662 | 4.932  | BB |
| 2 | 12.947 | 2758  | 53.8 | 0.8023 | 0.726 | 95.068 | BB |

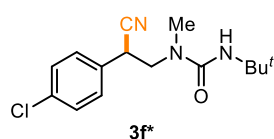

**3-(*tert*-Butyl)-1-(2-(4-chlorophenyl)-2-cyanoethyl)-1-methylurea (**3f\***):** Prepared *via* condition B from **1f** (0.2 mmol) in 67% yield (39.4 mg) and 96:4 er as a colorless oil.

<sup>1</sup>H NMR (400 MHz, Chloroform-*d*)  $\delta$  = 7.36–7.31 (m, 4H), 4.37 (dd,  $J$  = 9.1, 6.1 Hz, 1H), 4.23 (s, 1H), 3.84 (dd,  $J$  = 13.8, 6.1 Hz, 1H), 3.39 (dd,  $J$  = 13.8, 9.0 Hz, 1H), 2.93 (s, 3H), 1.37 (s, 9H).

<sup>13</sup>C NMR (101 MHz, Chloroform-*d*)  $\delta$  = 156.8, 134.4, 131.9, 129.3 (2C), 129.0 (2C), 120.1, 55.3, 51.0, 37.0, 36.6, 29.4 (3C).

HRMS (ESI-TOF):  $[M+Na]^+$  calcd. for C<sub>15</sub>H<sub>20</sub>ClN<sub>3</sub>O<sub>2</sub>: 316.1187, found: 316.1189.

Chiral HPLC: Chiralcel AD-H column, hexane:*i*PrOH (95:5), 1.0 mL/min, 220 nm,  $t_R$  (minor) = 10.6 min,  $t_R$  (major) = 14.3 min.

$[\alpha]_D^{21}$  = -8.0 (c = 1.0, CH<sub>2</sub>Cl<sub>2</sub>).

Racemic sample:

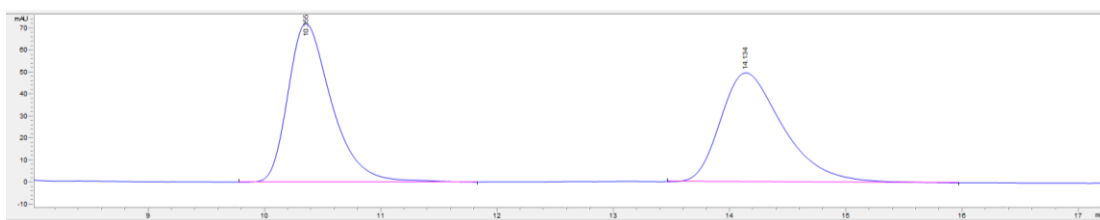

| # | 时间     | 峰面积    | 峰高   | 峰宽     | 对称因子  | 峰面积 %  | 类型 |
|---|--------|--------|------|--------|-------|--------|----|
| 1 | 10.355 | 1861.6 | 71.8 | 0.3926 | 0.65  | 50.298 | BB |
| 2 | 14.134 | 1839.6 | 49.3 | 0.567  | 0.638 | 49.702 | BB |

Enriched sample:

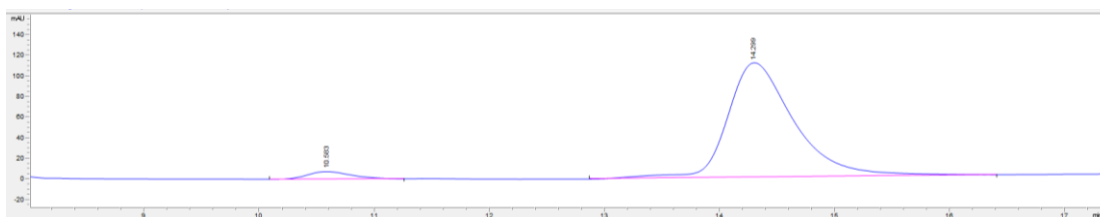

| # | 时间     | 峰面积    | 峰高    | 峰宽     | 对称因子  | 峰面积 %  | 类型 |
|---|--------|--------|-------|--------|-------|--------|----|
| 1 | 10.583 | 187.1  | 7.2   | 0.3958 | 0.735 | 4.023  | BB |
| 2 | 14.299 | 4463.3 | 110.9 | 0.5995 | 0.655 | 95.977 | BB |

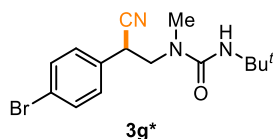

**1-(2-(4-Bromophenyl)-2-cyanoethyl)-3-(tert-butyl)-1-methylurea (3g\*):** Prepared *via* condition B from **1g** (0.2 mmol) in 55% yield (37.2 mg) and 90:10 er as a colorless oil.

<sup>1</sup>H NMR (400 MHz, Chloroform-*d*)  $\delta$  = 7.51–7.49 (m, 2H), 7.29–7.27 (m, 2H), 4.34 (dd, *J* = 9.1, 6.1 Hz, 1H), 4.26 (s, 1H), 3.83 (dd, *J* = 13.8, 6.2 Hz, 1H), 3.37 (dd, *J* = 13.8, 9.1 Hz, 1H), 2.92 (s, 3H), 1.35 (s, 9H).

<sup>13</sup>C NMR (101 MHz, Chloroform-*d*)  $\delta$  = 156.8, 132.4, 132.3 (2C), 129.3 (2C), 122.5, 120.0, 55.3, 51.1, 37.0, 36.7, 29.4 (3C).

HRMS (ESI-TOF): [M+Na]<sup>+</sup> calcd. for C<sub>15</sub>H<sub>20</sub>BrN<sub>3</sub>O<sub>2</sub>Na: 360.0682, found: 360.0682.

Chiral HPLC: Chiralcel OD-H column, hexane:*i*PrOH (95:5), 1.0 mL/min, 220 nm, *t*<sub>R</sub> (minor) = 13.2 min, *t*<sub>R</sub> (major) = 17.5 min.

[ $\alpha$ ]<sub>D</sub><sup>21</sup> = -32.5 (c = 1.0, CH<sub>2</sub>Cl<sub>2</sub>).

**Racemic sample:**

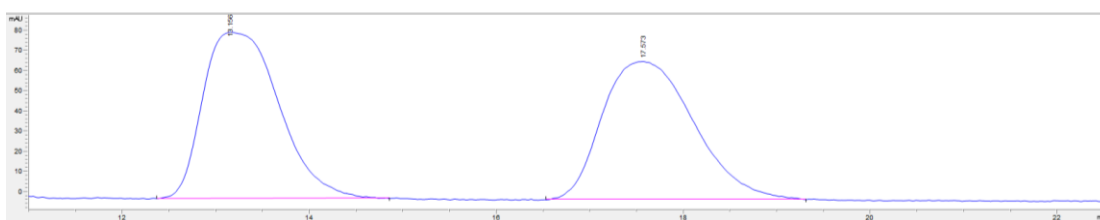

| # | 时间     | 峰面积    | 峰高   | 峰宽     | 对称因子  | 峰面积 %  | 类型   |
|---|--------|--------|------|--------|-------|--------|------|
| 1 | 13.156 | 4672.4 | 82.7 | 0.6773 | 0.566 | 49.995 | BV R |
| 2 | 17.573 | 4673.4 | 68.6 | 0.8113 | 0.786 | 50.005 | BB   |

**Enriched sample:**

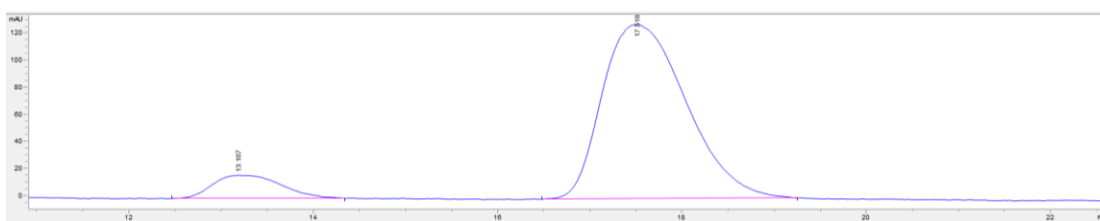

| # | 时间     | 峰面积    | 峰高    | 峰宽     | 对称因子  | 峰面积 %  | 类型 |
|---|--------|--------|-------|--------|-------|--------|----|
| 1 | 13.187 | 889.3  | 17.1  | 0.6271 | 0.587 | 9.842  | BB |
| 2 | 17.518 | 8146.6 | 128.8 | 0.7662 | 0.708 | 90.158 | BB |

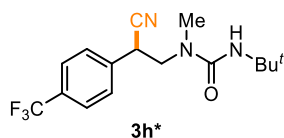

**3-(tert-Butyl)-1-(2-cyano-2-(4-(trifluoromethyl)phenyl)ethyl)-1-methylurea (3h\*):** Prepared *via* condition B from **1h** (0.2 mmol) in 56% yield (36.7 mg) and 93:7 er as a colorless oil.

$^1\text{H NMR}$  (400 MHz, Chloroform-*d*)  $\delta$  = 7.64 (d,  $J$  = 8.0 Hz, 2H), 7.53 (d,  $J$  = 8.1 Hz, 2H), 4.45 (dd,  $J$  = 9.1, 6.0 Hz, 1H), 4.28 (s, 1H), 3.88 (dd,  $J$  = 13.8, 6.1 Hz, 1H), 3.39 (dd,  $J$  = 13.8, 9.1 Hz, 1H), 2.93 (s, 3H), 1.34 (s, 9H).

$^{13}\text{C NMR}$  (101 MHz, Chloroform-*d*)  $\delta$  = 156.8, 137.3, 130.7 (q,  $J$  = 32.9 Hz), 128.1 (2C), 126.1 (q,  $J$  = 3.8 Hz, 2C), 123.8 (q,  $J$  = 272.7 Hz), 119.7, 55.2, 51.1, 37.0, 37.0, 29.3 (3C).

$^{19}\text{F NMR}$  (376 MHz, Chloroform-*d*)  $\delta$  = -62.71.

HRMS (ESI-TOF):  $[\text{M}+\text{Na}]^+$  calcd. for  $\text{C}_{16}\text{H}_{20}\text{F}_3\text{N}_3\text{ONa}$ : 350.1451, found: 350.1452.

Chiral HPLC: Chiralcel AD-H column, hexane:*i*PrOH (95:5), 1.0 mL/min, 220 nm,  $t_{\text{R}}$  (minor) = 10.0 min,  $t_{\text{R}}$  (major) = 11.2 min.

$[\alpha]_{\text{D}}^{21}$  = -9.1 (c = 1.0,  $\text{CH}_2\text{Cl}_2$ ).

Racemic sample:

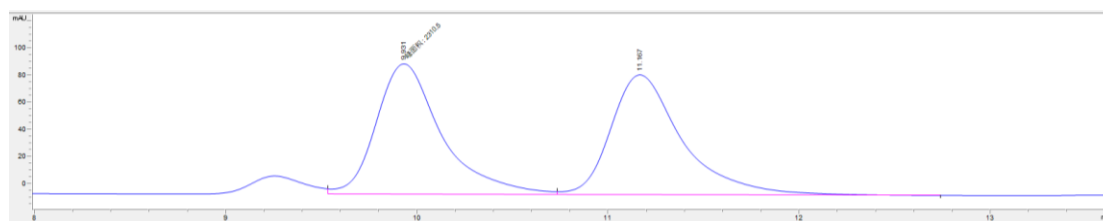

| # | 时间     | 峰面积    | 峰高   | 峰宽     | 对称因子  | 峰面积 %  | 类型 |
|---|--------|--------|------|--------|-------|--------|----|
| 1 | 9.931  | 2310.5 | 96.6 | 0.3988 | 0.707 | 49.971 | FM |
| 2 | 11.167 | 2313.2 | 88.8 | 0.3901 | 0.639 | 50.029 | VB |

Enriched sample:

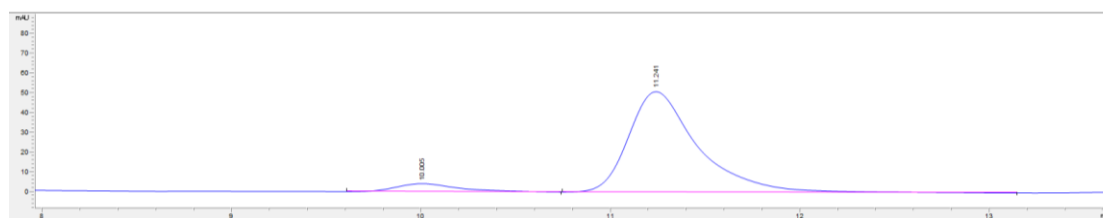

| # | 时间     | 峰面积  | 峰高   | 峰宽     | 对称因子  | 峰面积 %  | 类型 |
|---|--------|------|------|--------|-------|--------|----|
| 1 | 10.005 | 94.9 | 4.1  | 0.3409 | 0.655 | 6.787  | BB |
| 2 | 11.241 | 1304 | 51.1 | 0.3756 | 0.602 | 93.213 | BB |

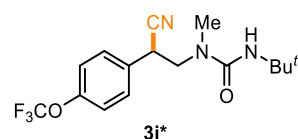

**3-(*tert*-Butyl)-1-(2-cyano-2-(4-(trifluoromethoxy)phenyl)ethyl)-1-methylurea (3i<sup>\*</sup>)**: Prepared *via* condition B from **1i** (0.2 mmol) in 57% yield (39.1 mg) and 93:7 er as a colorless oil.

$^1\text{H NMR}$  (400 MHz, Chloroform-*d*)  $\delta$  = 7.44 (d,  $J$  = 8.3 Hz, 2H), 7.24 (t,  $J$  = 7.8 Hz, 2H), 4.39 (t,  $J$  = 7.5 Hz, 1H), 4.27 (s, 1H), 3.87 (dd,  $J$  = 13.9, 5.7 Hz, 1H), 3.37 (dd,  $J$  = 13.9, 9.4 Hz, 1H), 2.94 (s, 3H), 1.36 (s, 9H).

$^{13}\text{C NMR}$  (101 MHz, Chloroform-*d*)  $\delta$  = 156.8, 149.2, 132.1, 129.2 (2C), 121.6 (2C), 120.4 (q,  $J$  = 258.2 Hz), 120.1, 55.3, 51.1, 36.9, 36.6, 29.4 (3C).

$^{19}\text{F NMR}$  (376 MHz, Chloroform-*d*)  $\delta$  = -57.91.

HRMS (ESI-TOF):  $[\text{M}+\text{Na}]^+$  calcd. for  $\text{C}_{16}\text{H}_{20}\text{F}_3\text{N}_3\text{O}_2\text{Na}$ : 366.1400, found: 366.1397.

Chiral HPLC: Chiralcel AD-H column, hexane:*i*PrOH (95:5), 1.0 mL/min, 220 nm,  $t_{\text{R}}$  (minor) = 7.7 min,

$t_R$  (major) = 9.8 min.

$[\alpha]_D^{21} = -9.0$  (c = 0.8,  $\text{CH}_2\text{Cl}_2$ ).

**Racemic sample:**

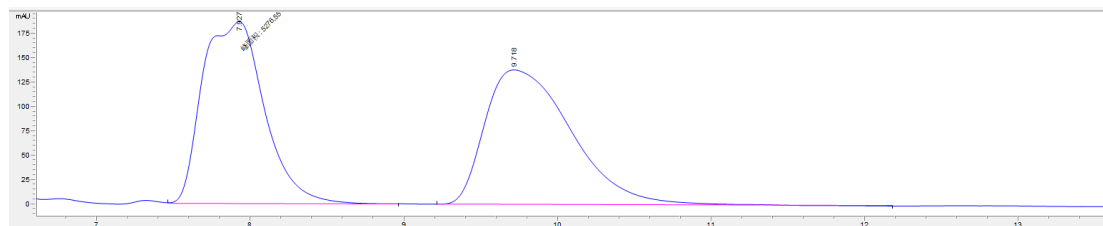

| # | 时间    | 峰面积    | 峰高    | 峰宽     | 对称因子  | 峰面积 %  | 类型   |
|---|-------|--------|-------|--------|-------|--------|------|
| 1 | 7.927 | 5276.5 | 187.1 | 0.47   | 0.394 | 49.295 | MM T |
| 2 | 9.718 | 5427.4 | 138   | 0.6248 | 0.485 | 50.705 | BB   |

**Enriched sample:**

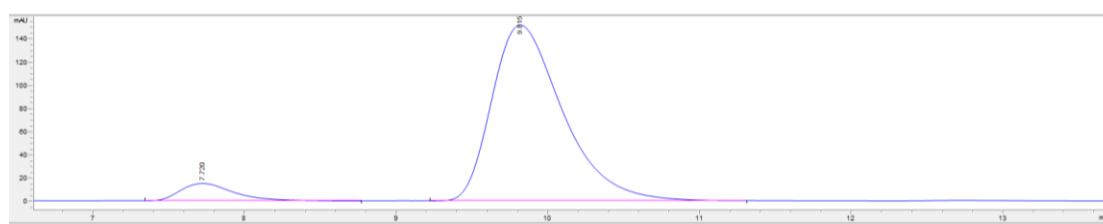

| # | 时间    | 峰面积  | 峰高    | 峰宽     | 对称因子  | 峰面积 %  | 类型 |
|---|-------|------|-------|--------|-------|--------|----|
| 1 | 7.72  | 365  | 14.9  | 0.3861 | 0.647 | 6.949  | BB |
| 2 | 9.815 | 4888 | 150.9 | 0.4979 | 0.628 | 93.051 | BB |

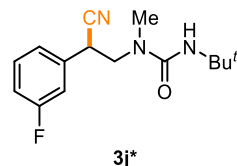

**3-(tert-Butyl)-1-(2-cyano-2-(3-fluorophenyl)ethyl)-1-methylurea (3j\*):** Prepared *via* condition B from **1j** (0.2 mmol) in 61% yield (33.8 mg) and 95:5 er as a colorless oil.

$^1\text{H NMR}$  (400 MHz, Chloroform-*d*)  $\delta$  = 7.35 (td,  $J$  = 8.0, 5.8 Hz, 1H), 7.19 (d,  $J$  = 7.7 Hz, 1H), 7.12 (dt,  $J$  = 9.4, 2.1 Hz, 1H), 7.06–7.01 (m, 1H), 4.38 (dd,  $J$  = 9.1, 6.2 Hz, 1H), 4.26 (s, 1H), 3.85 (dd,  $J$  = 13.8, 6.2 Hz, 1H), 3.40 (dd,  $J$  = 13.8, 9.1 Hz, 1H), 2.92 (s, 3H), 1.36 (s, 9H).

$^{13}\text{C NMR}$  (101 MHz, Chloroform-*d*)  $\delta$  = 163.0 (d,  $J$  = 247.9 Hz), 156.8, 135.7 (d,  $J$  = 7.5 Hz), 130.8 (d,  $J$  = 8.3 Hz), 123.4 (d,  $J$  = 3.1 Hz), 120.0, 115.5 (d,  $J$  = 21.0 Hz), 114.9 (d,  $J$  = 22.7 Hz), 55.3, 51.1, 37.0, 36.9 (d,  $J$  = 2.0 Hz), 29.4 (3C).

$^{19}\text{F NMR}$  (376 MHz, Chloroform-*d*)  $\delta$  = -111.53.

**HRMS** (ESI-TOF):  $[\text{M}+\text{Na}]^+$  calcd. for  $\text{C}_{15}\text{H}_{20}\text{FN}_3\text{ONa}$ : 300.1483, found: 300.1486.

**Chiral HPLC:** Chiralcel AD-H column, hexane:*i*PrOH (97:3), 1.0 mL/min, 220 nm,  $t_R$  (minor) = 13.6 min,  $t_R$  (major) = 16.4 min.

$[\alpha]_D^{21} = -25.0$  (c = 1.0,  $\text{CH}_2\text{Cl}_2$ ).

**Racemic sample:**



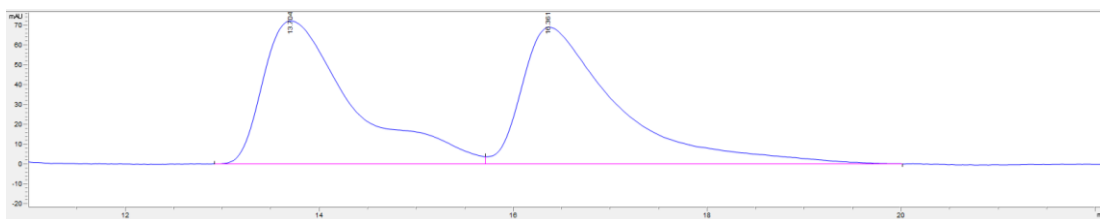

| # | 时间     | 峰面积    | 峰高   | 峰宽     | 对称因子  | 峰面积 %  | 类型 |
|---|--------|--------|------|--------|-------|--------|----|
| 1 | 13.704 | 4592.2 | 71.8 | 0.8945 | 0.418 | 49.633 | BV |
| 2 | 16.361 | 4660.2 | 68.7 | 0.9072 | 0.371 | 50.367 | VB |

Enriched sample:

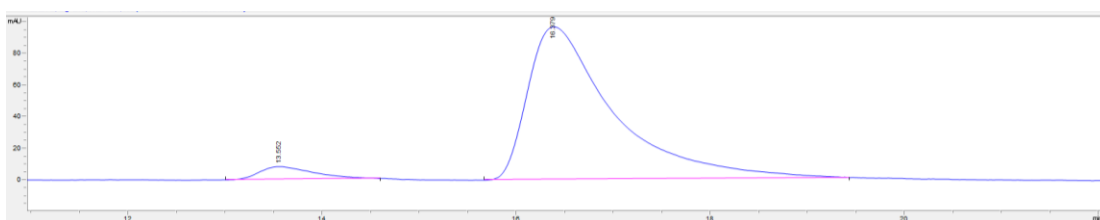

| # | 时间     | 峰面积    | 峰高   | 峰宽     | 对称因子  | 峰面积 %  | 类型 |
|---|--------|--------|------|--------|-------|--------|----|
| 1 | 13.552 | 313.6  | 8.1  | 0.4694 | 0.545 | 5.023  | BB |
| 2 | 16.379 | 5929.9 | 96.8 | 0.8484 | 0.404 | 94.977 | BB |

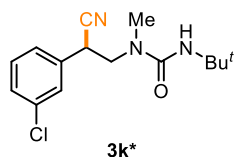

**3-(tert-Butyl)-1-(2-(3-chlorophenyl)-2-cyanoethyl)-1-methylurea (3k\*):** Prepared *via* condition B from **1k** (0.2 mmol) in 62% yield (36.5 mg) and 96:4 er as a white solid.

<sup>1</sup>H NMR (400 MHz, Chloroform-*d*)  $\delta$  = 7.42 (q, *J* = 1.5 Hz, 1H), 7.33 (m, 3H), 4.38 (d, *J* = 2.9 Hz, 1H), 4.29 (s, 1H), 3.86 (dd, *J* = 13.8, 6.2 Hz, 1H), 3.41 (dd, *J* = 13.8, 9.1 Hz, 1H), 2.93 (s, 3H), 1.37 (s, 9H).

<sup>13</sup>C NMR (101 MHz, Chloroform-*d*)  $\delta$  = 156.8, 135.3, 135.0, 130.4, 128.6, 127.8, 125.9, 119.9, 55.3, 51.1, 37.0, 36.8, 29.4 (3C).

HRMS (ESI-TOF): [M+Na]<sup>+</sup> calcd. for C<sub>15</sub>H<sub>20</sub>ClN<sub>3</sub>ONa: 316.1188, found: 316.1185.

Chiral HPLC: Chiralcel AD-H column, hexane:*i*PrOH (95:5), 1.0 mL/min, 220 nm, *t<sub>R</sub>* (minor) = 8.8 min, *t<sub>R</sub>* (major) = 10.3 min.

$[\alpha]_D^{21}$  = -6.2 (c = 0.7, CH<sub>2</sub>Cl<sub>2</sub>).

Racemic sample:

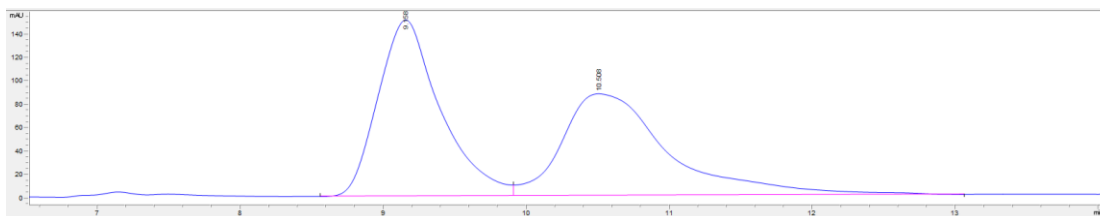

| # | 时间     | 峰面积    | 峰高    | 峰宽     | 对称因子  | 峰面积 %  | 类型 |
|---|--------|--------|-------|--------|-------|--------|----|
| 1 | 9.158  | 4561.3 | 150.1 | 0.4546 | 0.739 | 50.370 | BV |
| 2 | 10.508 | 4494.3 | 86.6  | 0.7735 | 0.497 | 49.630 | VB |

Enriched sample:

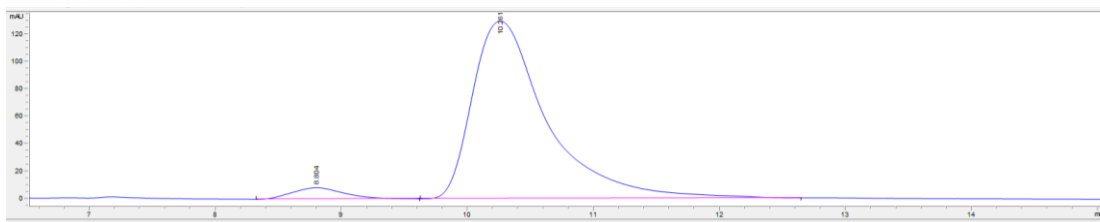

| # | 时间     | 峰面积    | 峰高    | 峰宽     | 对称因子  | 峰面积 %  | 类型 |
|---|--------|--------|-------|--------|-------|--------|----|
| 1 | 8.804  | 235.8  | 8.2   | 0.4124 | 0.841 | 4.263  | BB |
| 2 | 10.261 | 5295.6 | 129.1 | 0.6164 | 0.537 | 95.737 | BB |

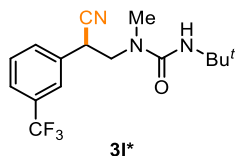

**3-(tert-Butyl)-1-(2-cyano-2-(3-(trifluoromethyl)phenyl)ethyl)-1-methylurea (31\*):** Prepared *via* condition B from **11** (0.2 mmol) in 52% yield (34.0 mg) and 95:5 er as a colorless oil.

<sup>1</sup>H NMR (400 MHz, Chloroform-*d*)  $\delta$  = 7.63–7.59 (m, 3H), 7.54–7.50 (m, 1H), 4.48 (dd,  $J$  = 9.1, 6.3 Hz, 1H), 4.28 (s, 1H), 3.84 (dd,  $J$  = 13.8, 6.3 Hz, 1H), 3.43 (dd,  $J$  = 13.8, 9.1 Hz, 1H), 2.90 (s, 3H), 1.35 (s, 9H).

<sup>13</sup>C NMR (101 MHz, Chloroform-*d*)  $\delta$  = 156.8, 134.4, 132.6 (q,  $J$  = 32.7 Hz), 131.1, 129.8, 125.3 (q,  $J$  = 3.8 Hz), 123.7 (q,  $J$  = 267.5 Hz), 124.5 (q,  $J$  = 3.8 Hz), 119.7, 55.3, 51.1, 37.0, 36.9, 29.3 (3C).

<sup>19</sup>F NMR (376 MHz, Chloroform-*d*)  $\delta$  = -62.64.

HRMS (ESI-TOF):  $[M+Na]^+$  calcd. for C<sub>16</sub>H<sub>20</sub>F<sub>3</sub>N<sub>3</sub>ONa: 350.1451, found: 350.1453.

Chiral HPLC: Chiralcel AD-H column, hexane:*i*PrOH (98:2), 1.0 mL/min, 220 nm,  $t_R$  (minor) = 17.7 min,  $t_R$  (major) = 23.1 min.

$[\alpha]_D^{25}$  = -11.7 ( $c$  = 1.0, CH<sub>2</sub>Cl<sub>2</sub>).

**Racemic sample:**

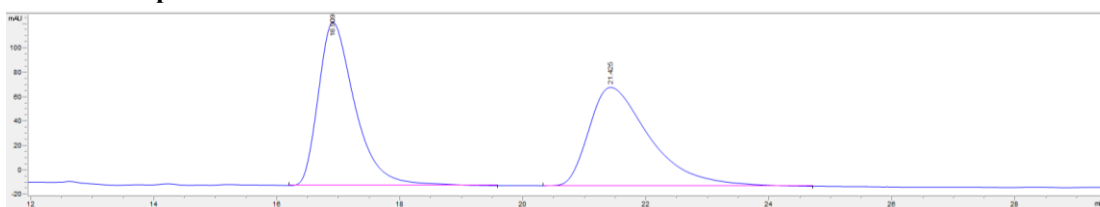

| # | 时间     | 峰面积    | 峰高    | 峰宽     | 对称因子  | 峰面积 %  | 类型 |
|---|--------|--------|-------|--------|-------|--------|----|
| 1 | 16.909 | 5506.5 | 133.2 | 0.6222 | 0.616 | 49.922 | BB |
| 2 | 21.425 | 5523.6 | 80.4  | 1.0117 | 0.523 | 50.078 | BB |

**Enriched sample:**

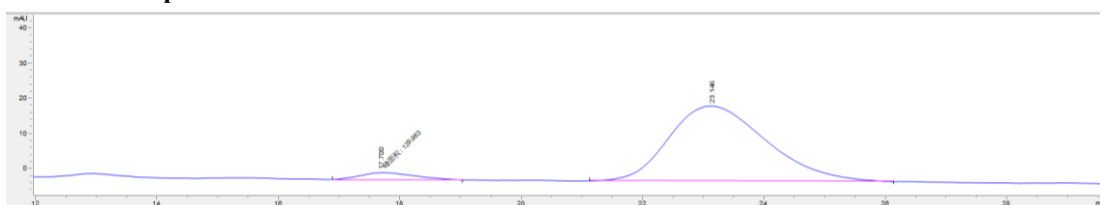

| # | 时间     | 峰面积    | 峰高   | 峰宽     | 对称因子  | 峰面积 %  | 类型   |
|---|--------|--------|------|--------|-------|--------|------|
| 1 | 17.7   | 130    | 2.1  | 1.0564 | 0.665 | 5.193  | MM T |
| 2 | 23.146 | 2373.2 | 21.2 | 1.3195 | 0.773 | 94.807 | BB   |

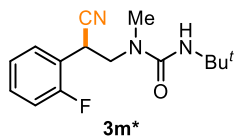

**3-(tert-Butyl)-1-(2-cyano-2-(2-fluorophenyl)ethyl)-1-methylurea (3m\*):** Prepared *via* condition B from **1m** (0.2 mmol) in 65% yield (36.0 mg) and 99:1 er as a colorless oil.

<sup>1</sup>H NMR (400 MHz, Chloroform-*d*)  $\delta$  = 7.44 (td,  $J$  = 7.6, 1.7 Hz, 1H), 7.36–7.30 (m, 1H), 7.17 (td,  $J$  = 7.6, 1.0 Hz, 1H), 7.08 (ddd,  $J$  = 9.5, 8.4, 0.9 Hz, 1H), 4.52 (dd,  $J$  = 8.4, 6.6 Hz, 1H), 4.24 (s, 1H), 3.75 (dd,  $J$  = 13.9, 6.7 Hz, 1H), 3.65 (dd,  $J$  = 13.9, 8.4 Hz, 1H), 2.89 (s, 3H), 1.31 (s, 9H).

<sup>13</sup>C NMR (101 MHz, Chloroform-*d*)  $\delta$  = 160.3 (d,  $J$  = 248.4 Hz), 156.7, 130.5 (d,  $J$  = 8.3 Hz), 129.8 (d,  $J$  = 3.4 Hz), 124.9 (d,  $J$  = 3.6 Hz), 120.7 (d,  $J$  = 14.2 Hz), 119.3, 116.0 (d,  $J$  = 21.2 Hz), 52.9 (d,  $J$  = 1.6 Hz), 51.0, 36.5, 31.5 (d,  $J$  = 1.9 Hz), 29.3 (3C).

<sup>19</sup>F NMR (376 MHz, Chloroform-*d*)  $\delta$  = -117.36.

HRMS (ESI-TOF):  $[M+Na]^+$  calcd. for C<sub>15</sub>H<sub>20</sub>FN<sub>3</sub>ONa: 300.1483, found: 300.1480.

Chiral HPLC: Chiralcel IB column, hexane:*i*PrOH (97:3), 1.0 mL/min, 220 nm,  $t_R$  (major) = 14.6 min,  $t_R$  (minor) = 17.3 min.

$[\alpha]_D^{21}$  = -9.8 (c = 1.0, CH<sub>2</sub>Cl<sub>2</sub>).

**Racemic sample:**

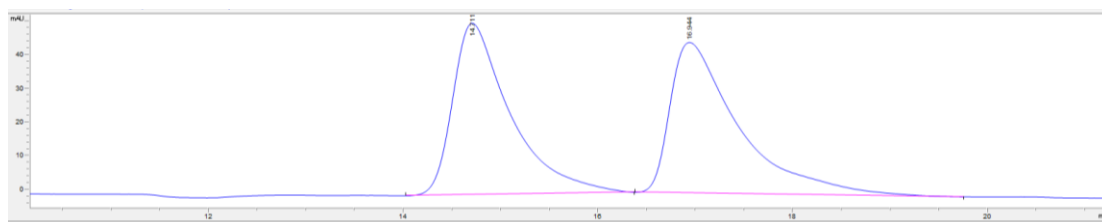

| # | 时间     | 峰面积    | 峰高   | 峰宽     | 对称因子  | 峰面积 %  | 类型 |
|---|--------|--------|------|--------|-------|--------|----|
| 1 | 14.711 | 2087.8 | 50.8 | 0.5955 | 0.48  | 48.923 | BB |
| 2 | 16.944 | 2179.7 | 44.6 | 0.6861 | 0.364 | 51.077 | BB |

**Enriched sample:**

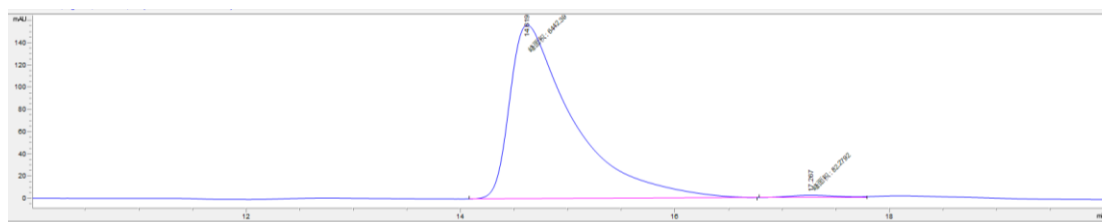

| # | 时间     | 峰面积    | 峰高    | 峰宽     | 对称因子  | 峰面积 %  | 类型 |
|---|--------|--------|-------|--------|-------|--------|----|
| 1 | 14.619 | 6442.4 | 156.9 | 0.6844 | 0.367 | 98.739 | MM |
| 2 | 17.267 | 82.3   | 2.3   | 0.5984 | 0.7   | 1.261  | MM |

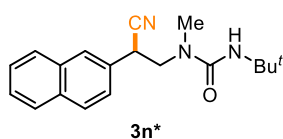

**3-(tert-Butyl)-1-(2-cyano-2-(naphthalen-2-yl)ethyl)-1-methylurea (3n\*):** Prepared *via* condition B from **1n** (0.2 mmol) in 65% yield (40.2 mg) and 95:5 er as a colorless oil.

<sup>1</sup>H NMR (400 MHz, Chloroform-*d*)  $\delta$  = 7.86–7.80 (m, 4H), 7.51–7.46 (m, 3H), 4.52 (dd,  $J$  = 9.0, 6.3 Hz,

1H), 4.23 (s, 1H), 3.91 (dd,  $J = 13.9, 6.3$  Hz, 1H), 3.48 (dd,  $J = 13.9, 9.0$  Hz, 1H), 2.89 (s, 3H), 1.33 (s, 9H).

$^{13}\text{C}$  NMR (101 MHz, Chloroform- $d$ )  $\delta = 156.9, 133.3, 132.9, 130.7, 129.1, 127.9, 127.8, 126.8, 126.8, 126.6, 125.1, 120.5, 55.4, 51.0, 37.3, 36.9, 29.4$  (3C).

HRMS (ESI-TOF):  $[\text{M}+\text{Na}]^+$  calcd. for  $\text{C}_{19}\text{H}_{23}\text{N}_3\text{ONa}$ : 332.1734, found: 332.1733.

Chiral HPLC: Chiralcel AD-H column, hexane: $i$ PrOH (95:5), 1.0 mL/min, 220 nm,  $t_{\text{R}}$  (minor) = 11.8 min,  $t_{\text{R}}$  (major) = 14.2 min.

$[\alpha]_{\text{D}}^{21} = -15.6$  ( $c = 1.0, \text{CH}_2\text{Cl}_2$ ).

Racemic sample:

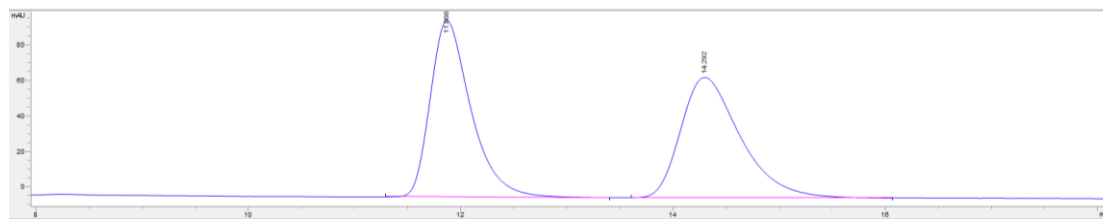

| # | 时间     | 峰面积    | 峰高   | 峰宽     | 对称因子  | 峰面积 %  | 类型 |
|---|--------|--------|------|--------|-------|--------|----|
| 1 | 11.866 | 2638.3 | 99.3 | 0.4019 | 0.647 | 49.990 | BB |
| 2 | 14.292 | 2639.3 | 67.8 | 0.5884 | 0.635 | 50.010 | BB |

Enriched sample:

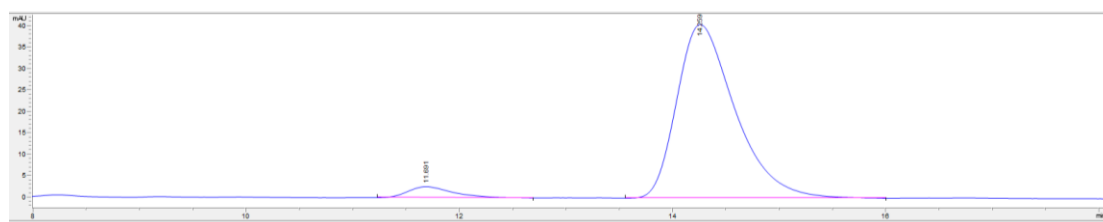

| # | 时间     | 峰面积    | 峰高   | 峰宽     | 对称因子 | 峰面积 %  | 类型 |
|---|--------|--------|------|--------|------|--------|----|
| 1 | 11.691 | 76.6   | 2.6  | 0.4215 | 0.65 | 4.712  | BB |
| 2 | 14.259 | 1548.7 | 40.7 | 0.5737 | 0.63 | 95.288 | BB |

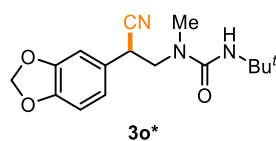

1-(2-(Benzo[ $d$ ][1,3]dioxol-5-yl)-2-cyanoethyl)-3-(*tert*-butyl)-1-methylurea (**30\***): Prepared *via* condition B from **1o** (0.2 mmol) in 67% yield (40.7 mg) and 98:2 er as a white solid.

$^1\text{H}$  NMR (400 MHz, Chloroform- $d$ )  $\delta = 6.84\text{--}6.80$  (m, 2H), 6.76 (d,  $J = 7.9$  Hz, 1H), 5.94 (s, 2H), 4.22 (dd,  $J = 8.9, 6.3$  Hz, 2H), 3.73 (dd,  $J = 13.8, 6.4$  Hz, 1H), 3.37 (dd,  $J = 13.8, 8.9$  Hz, 1H), 2.87 (s, 3H), 1.31 (d,  $J = 1.7$  Hz, 9H).

$^{13}\text{C}$  NMR (101 MHz, Chloroform- $d$ )  $\delta = 156.8, 148.3, 147.7, 127.0, 121.1, 120.5, 108.7, 108.0, 101.4, 55.4, 50.9, 36.9, 36.7, 29.4$  (3C).

HRMS (ESI-TOF):  $[\text{M}+\text{Na}]^+$  calcd. for  $\text{C}_{16}\text{H}_{21}\text{N}_3\text{O}_3\text{Na}$ : 326.1475, found: 326.1473.

Chiral HPLC: Chiralcel IF column, hexane: $i$ PrOH (95:5), 1.0 mL/min, 220 nm,  $t_{\text{R}}$  (minor) = 32.4 min,  $t_{\text{R}}$  (major) = 33.9 min.

$[\alpha]_{\text{D}}^{21} = -27.0$  ( $c = 1.0, \text{CH}_2\text{Cl}_2$ ).

Racemic sample:

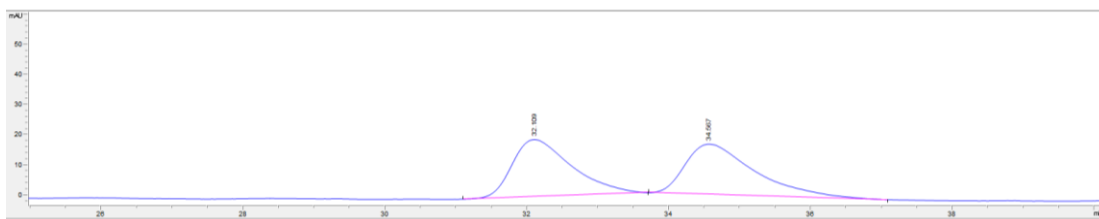

| # | 时间     | 峰面积    | 峰高   | 峰宽     | 对称因子  | 峰面积 %  | 类型 |
|---|--------|--------|------|--------|-------|--------|----|
| 1 | 32.109 | 1102.1 | 19   | 0.8213 | 0.578 | 49.166 | BB |
| 2 | 34.567 | 1139.5 | 16.8 | 0.9217 | 0.488 | 50.834 | BB |

Enriched sample:

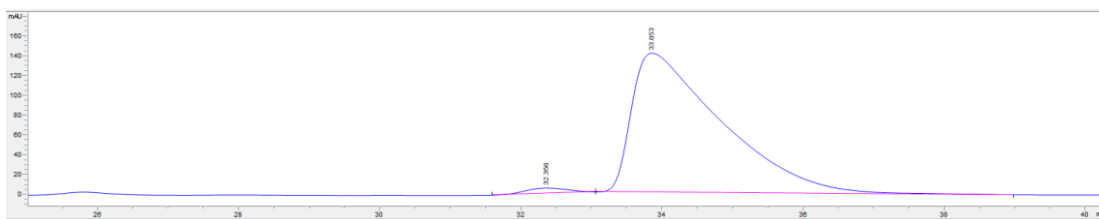

| # | 时间     | 峰面积     | 峰高    | 峰宽     | 对称因子  | 峰面积 %  | 类型 |
|---|--------|---------|-------|--------|-------|--------|----|
| 1 | 32.356 | 229.2   | 5.4   | 0.5667 | 0.938 | 1.820  | BB |
| 2 | 33.853 | 12364.7 | 140.2 | 1.2106 | 0.274 | 98.180 | BB |

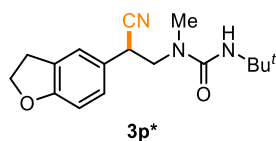

**3-(tert-Butyl)-1-(2-cyano-2-(2,3-dihydrobenzofuran-5-yl)ethyl)-1-methylurea (3p\*)**: Prepared *via* condition B from **1p** (0.2 mmol) in 64% yield (38.6 mg) and 93:7 er as a colorless oil.

<sup>1</sup>H NMR (400 MHz, Chloroform-*d*)  $\delta$  = 7.23 (s, 1H), 7.10 (d, *J* = 8.3 Hz, 1H), 6.76 (d, *J* = 8.2 Hz, 1H), 4.58 (td, *J* = 8.8, 2.5 Hz, 2H), 4.24 (dd, *J* = 14.6, 7.9 Hz, 2H), 3.81 (dd, *J* = 13.9, 6.2 Hz, 1H), 3.34 (dd, *J* = 13.6, 9.4 Hz, 1H), 3.20 (t, *J* = 8.9 Hz, 2H), 2.93 (s, 3H), 1.34 (s, 9H).

<sup>13</sup>C NMR (101 MHz, Chloroform-*d*)  $\delta$  = 160.2, 156.9, 128.2, 127.5, 125.2, 124.3, 120.9, 109.7, 71.5, 55.6, 51.0, 36.8, 36.6, 29.5, 29.4 (3C).

HRMS (ESI-TOF): [M+Na]<sup>+</sup> calcd. for C<sub>17</sub>H<sub>23</sub>N<sub>3</sub>O<sub>2</sub>Na: 324.1682, found: 324.1673.

Chiral HPLC: Chiralcel OD-H column, hexane:*i*PrOH (90:10), 1.0 mL/min, 220 nm, *t<sub>R</sub>* (minor) = 12.3 min, *t<sub>R</sub>* (major) = 14.5 min.

[ $\alpha$ ]<sub>D</sub><sup>21</sup> = -17.8 (c = 1.0, CH<sub>2</sub>Cl<sub>2</sub>).

Racemic sample:

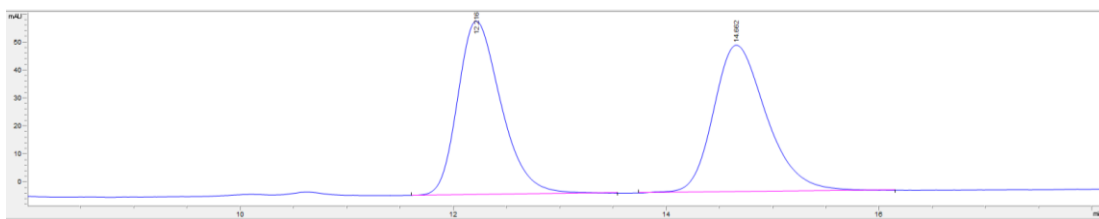

| # | 时间     | 峰面积    | 峰高   | 峰宽     | 对称因子  | 峰面积 %  | 类型 |
|---|--------|--------|------|--------|-------|--------|----|
| 1 | 12.216 | 1751.1 | 61.8 | 0.4327 | 0.702 | 49.092 | BB |
| 2 | 14.662 | 1815.9 | 52.2 | 0.5395 | 0.72  | 50.908 | BB |

**Enriched sample:**

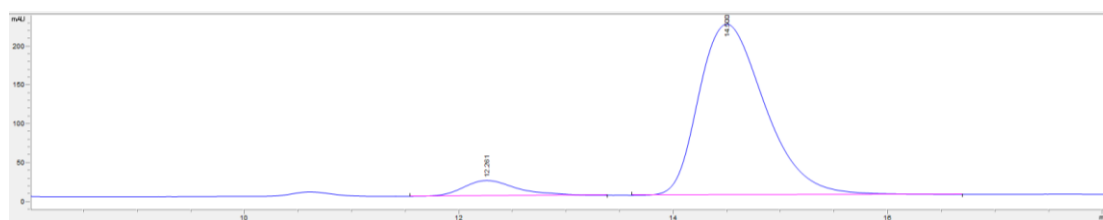

| # | 时间     | 峰面积    | 峰高    | 峰宽     | 对称因子  | 峰面积 %  | 类型 |
|---|--------|--------|-------|--------|-------|--------|----|
| 1 | 12.261 | 697.6  | 19.8  | 0.5226 | 0.719 | 6.905  | BB |
| 2 | 14.5   | 9405.1 | 219.9 | 0.6651 | 0.691 | 93.095 | BB |

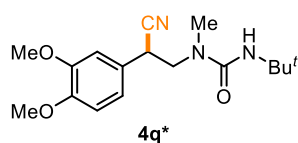

**3-(tert-Butyl)-1-(2-cyano-2-(3,4-dimethoxyphenyl)ethyl)-1-methylurea (4q\*):** Prepared *via* condition B from **2q** (0.2 mmol) in 71% yield (45.4 mg) and 94:6 er as a colorless oil.

<sup>1</sup>H NMR (400 MHz, Chloroform-*d*)  $\delta$  = 6.94 (dd, *J* = 8.3, 2.1 Hz, 1H), 6.85 (dd, *J* = 5.2, 3.1 Hz, 2H), 4.30 (dd, *J* = 9.1, 6.4 Hz, 1H), 4.22 (s, 1H), 3.89 (s, 3H), 3.87 (s, 3H), 3.82 (dd, *J* = 13.8, 6.5 Hz, 1H), 3.38 (dd, *J* = 13.9, 9.1 Hz, 1H), 2.92 (s, 3H), 1.35 (s, 9H).

<sup>13</sup>C NMR (101 MHz, Chloroform-*d*)  $\delta$  = 156.9, 149.4, 149.0, 125.7, 120.6, 119.9, 111.5, 110.6, 56.1, 56.0, 55.4, 56.0, 36.9, 36.7, 29.4 (3C).

**HRMS** (ESI-TOF): [M+Na]<sup>+</sup> calcd. for C<sub>17</sub>H<sub>25</sub>N<sub>3</sub>O<sub>3</sub>Na: 342.1788, found: 342.1793.

**Chiral HPLC:** Chiralcel AD-H column, hexane:*i*PrOH (95:5), 1.0 mL/min, 220 nm, *t*<sub>R</sub> (minor) = 17.4 min, *t*<sub>R</sub> (major) = 19.0 min.

[ $\alpha$ ]<sub>D</sub><sup>21</sup> = -27.0 (c = 1.0, CH<sub>2</sub>Cl<sub>2</sub>).

**Racemic sample:**

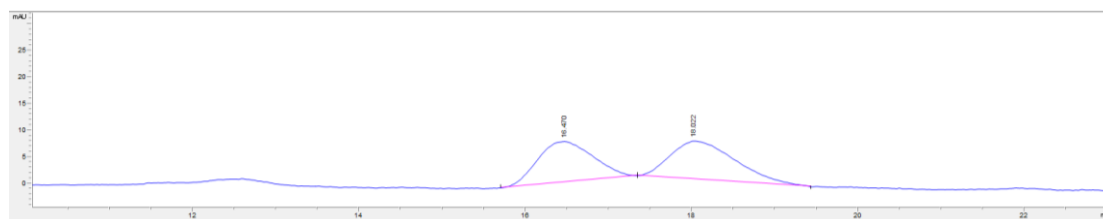

| # | 时间     | 峰面积   | 峰高  | 峰宽     | 对称因子  | 峰面积 %  | 类型 |
|---|--------|-------|-----|--------|-------|--------|----|
| 1 | 16.47  | 357   | 7.7 | 0.5477 | 0.944 | 47.262 | BB |
| 2 | 18.022 | 398.4 | 7.2 | 0.662  | 0.528 | 52.738 | BB |

**Enriched sample:**

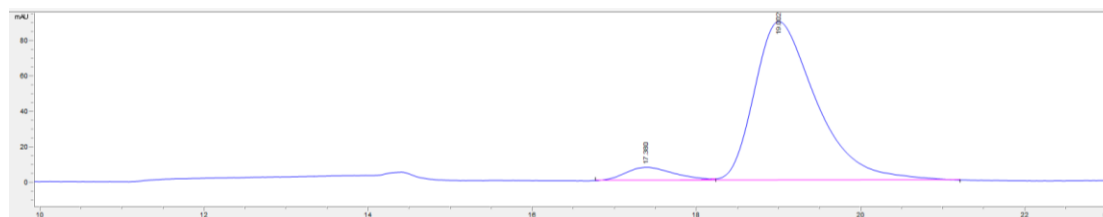

| # | 时间     | 峰面积    | 峰高   | 峰宽     | 对称因子  | 峰面积 %  | 类型   |
|---|--------|--------|------|--------|-------|--------|------|
| 1 | 17.38  | 311.5  | 7.5  | 0.5043 | 0.688 | 6.198  | BV E |
| 2 | 19.002 | 4714.3 | 89.9 | 0.7701 | 0.847 | 93.802 | VB R |

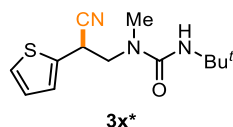

**3-(tert-Butyl)-1-(2-cyano-2-(thiophen-2-yl)ethyl)-1-methylurea (3x\*):** Prepared *via* condition B from **1x** (0.2 mmol) in 52% yield (27.6 mg) and 91:9 er as a colorless oil.

<sup>1</sup>H NMR (400 MHz, Chloroform-*d*)  $\delta$  = 7.28 (dd,  $J$  = 5.1, 1.2 Hz, 1H), 7.09 (dt,  $J$  = 3.6, 1.0 Hz, 1H), 6.99 (dd,  $J$  = 5.1, 3.5 Hz, 1H), 4.64 (dd,  $J$  = 8.5, 6.8 Hz, 1H), 4.27 (s, 1H), 3.88 (dd,  $J$  = 13.7, 6.6 Hz, 1H), 3.50 (dd,  $J$  = 13.8, 8.8 Hz, 1H), 2.93 (s, 3H), 1.35 (s, 9H).

<sup>13</sup>C NMR (101 MHz, Chloroform-*d*)  $\delta$  = 156.8, 135.0, 127.3, 126.7, 126.0, 119.6, 55.4, 51.0, 37.0, 32.3, 29.4 (3C).

HRMS (ESI-TOF):  $[M+Na]^+$  calcd. for C<sub>13</sub>H<sub>19</sub>N<sub>3</sub>OSNa: 288.1141, found: 288.1144.

Chiral HPLC: Chiralcel AD-H column, hexane:*i*PrOH (95:5), 1.0 mL/min, 220 nm,  $t_R$  (minor) = 10.5 min,  $t_R$  (major) = 12.6 min.

$[\alpha]_D^{21}$  = -6.8 (c = 1.0, CH<sub>2</sub>Cl<sub>2</sub>).

**Racemic sample:**

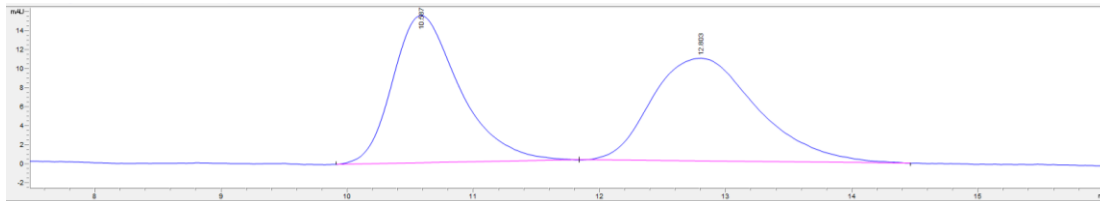

| # | 时间     | 峰面积   | 峰高   | 峰宽     | 对称因子  | 峰面积 %  | 类型 |
|---|--------|-------|------|--------|-------|--------|----|
| 1 | 10.587 | 570.1 | 15.4 | 0.5579 | 0.695 | 47.736 | BB |
| 2 | 12.803 | 624.2 | 10.8 | 0.6909 | 0.837 | 52.264 | BB |

**Enriched sample:**

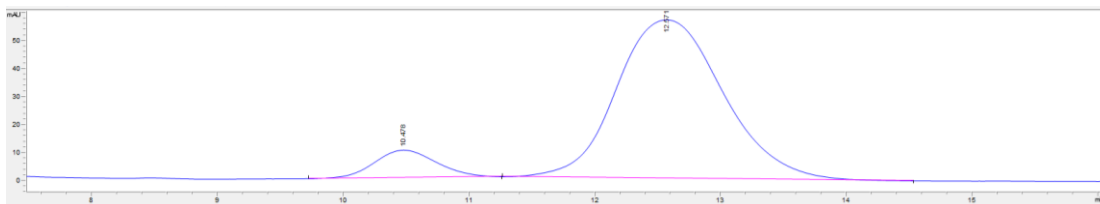

| # | 时间     | 峰面积    | 峰高   | 峰宽     | 对称因子  | 峰面积 %  | 类型 |
|---|--------|--------|------|--------|-------|--------|----|
| 1 | 10.478 | 341.4  | 9.9  | 0.5083 | 0.884 | 9.256  | BB |
| 2 | 12.571 | 3346.6 | 56.8 | 0.9137 | 0.867 | 90.744 | BB |

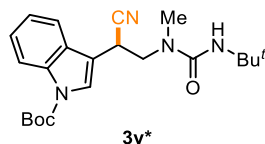

**tert-Butyl 3-(2-(3-(tert-butyl)-1-methylureido)-1-cyanoethyl)-1H-indole-1-carboxylate (3y\*):** Prepared *via* condition B from **1y** (0.2 mmol) in 55% yield (43.8 mg) and 96:4 er as a Colorless oil.

<sup>1</sup>H NMR (400 MHz, Chloroform-*d*)  $\delta$  = 8.17 (d,  $J$  = 7.4 Hz, 1H), 7.78 (d,  $J$  = 7.5 Hz, 1H), 7.67 (s, 1H), 7.36 (t,  $J$  = 8.0 Hz, 1H), 7.30 (d,  $J$  = 7.3 Hz, 1H), 4.60 (t,  $J$  = 7.9 Hz, 1H), 4.25 (s, 1H), 4.06 (dd,  $J$  = 14.3,



5.8 Hz, 1H), 3.45 (dd,  $J = 14.1, 9.8$  Hz, 1H), 2.96 (s, 3H), 1.67 (s, 9H), 1.36 (s, 9H).

$^{13}\text{C}$  NMR (101 MHz, Chlo-roform- $d$ )  $\delta = 156.9, 149.3, 135.0, 128.0, 125.2, 124.1, 123.2, 120.0, 119.1, 115.5, 113.0, 84.3, 53.6, 51.0, 37.1, 29.4$  (3C), 28.8, 28.2 (3C).

HRMS (ESI-TOF):  $[\text{M}+\text{Na}]^+$  calcd. for  $\text{C}_{22}\text{H}_{30}\text{N}_4\text{O}_3\text{Na}$ : 421.2210, found: 421.2212.

Chiral HPLC: Chiralcel AD-H column, hexane: $i$ PrOH (95:5), 1.0 mL/min, 220 nm,  $t_{\text{R}}$  (major) = 7.7 min,  $t_{\text{R}}$  (minor) = 10.4 min.

$[\alpha]_{\text{D}}^{21} = -25.2$  ( $c = 0.8, \text{CH}_2\text{Cl}_2$ ).

#### Racemic sample:

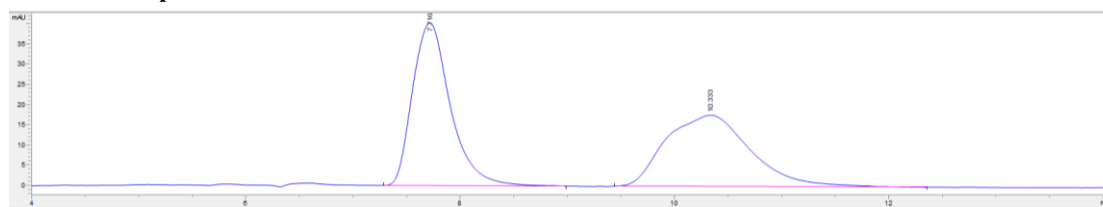

| # | 时间     | 峰面积   | 峰高   | 峰宽     | 对称因子  | 峰面积 %  | 类型 |
|---|--------|-------|------|--------|-------|--------|----|
| 1 | 7.716  | 992.8 | 40.5 | 0.3821 | 0.78  | 50.514 | BB |
| 2 | 10.333 | 972.6 | 17.7 | 0.7343 | 1.031 | 49.486 | BB |

#### Enriched sample:

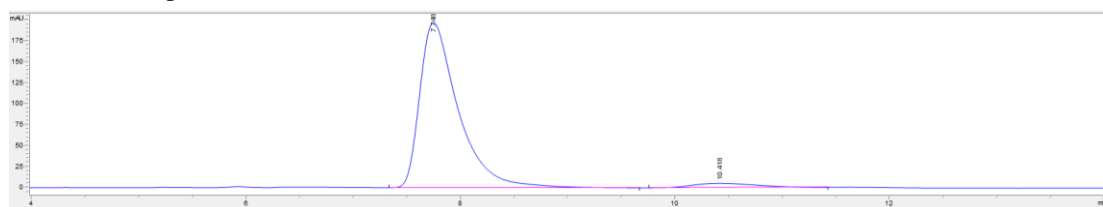

| # | 时间     | 峰面积    | 峰高    | 峰宽     | 对称因子  | 峰面积 %  | 类型 |
|---|--------|--------|-------|--------|-------|--------|----|
| 1 | 7.748  | 4900.1 | 196.8 | 0.3705 | 0.507 | 95.881 | BB |
| 2 | 10.418 | 210.5  | 5.1   | 0.4932 | 0.713 | 4.119  | BB |

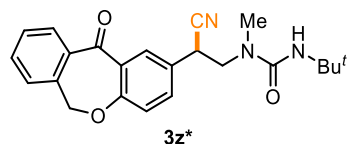

**3-(*tert*-Butyl)-1-(2-cyano-2-(11-oxo-6,11-dihydrodibenzo[*b,e*]oxepin-2-yl)ethyl)-1-methylurea (3z\*):** Prepared *via* condition B from **1z** (0.2 mmol) in 62% yield (48.5 mg), and 94:6 er ((1*R*,2*S*)-**L24**) or 5:95 er ((1*S*,2*R*)-**L24**) as a colorless oil.

$^1\text{H}$  NMR (400 MHz, Chloroform- $d$ )  $\delta = 8.23$  (d,  $J = 2.5$  Hz, 1H), 7.88 (dd,  $J = 7.7, 1.4$  Hz, 1H), 7.57 (td,  $J = 7.5, 1.4$  Hz, 1H), 7.59–7.46 (m, 2H), 7.37 (dd,  $J = 7.4, 1.3$  Hz, 1H), 7.08 (d,  $J = 8.5$  Hz, 1H), 5.19 (s, 2H), 4.36 (dd,  $J = 9.0, 6.3$  Hz, 1H), 4.27 (s, 1H), 3.85 (dd,  $J = 13.8, 6.4$  Hz, 1H), 3.45 (dd,  $J = 13.8, 9.0$  Hz, 1H), 2.95 (s, 3H), 1.35 (s, 9H).

$^{13}\text{C}$  NMR (101 MHz, Chloroform- $d$ )  $\delta = 190.4, 161.1, 156.8, 140.3, 135.3, 134.5, 133.0, 131.0, 129.5, 129.4, 127.9, 127.2, 125.5, 121.9, 120.1, 73.6, 54.8, 51.0, 36.8, 36.3, 29.4$  (3C).

HRMS (ESI-TOF):  $[\text{M}+\text{Na}]^+$  calcd. for  $\text{C}_{23}\text{H}_{25}\text{N}_3\text{O}_3\text{Na}$ : 414.1788, found: 414.1788.

Chiral HPLC: Chiralcel AD-H column, hexane: $i$ PrOH (90:10), 1.0 mL/min, 220 nm,  $t_{\text{R}}$  (minor) = 29.0 min,  $t_{\text{R}}$  (major) = 39.0 min.

$[\alpha]_{\text{D}}^{21} = -29.7$  ( $c = 1.0, \text{CH}_2\text{Cl}_2$ ).

#### Racemic sample:



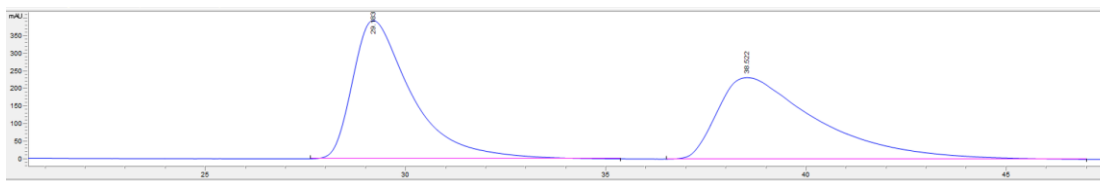

| # | 时间     | 峰面积     | 峰高    | 峰宽     | 对称因子  | 峰面积 %  | 类型 |
|---|--------|---------|-------|--------|-------|--------|----|
| 1 | 29.183 | 40627.1 | 396.5 | 1.4235 | 0.499 | 49.931 | BB |
| 2 | 38.522 | 40739.2 | 233.6 | 2.0684 | 0.411 | 50.069 | BB |

Enriched sample:

With (1*R*,2*S*)-L24:

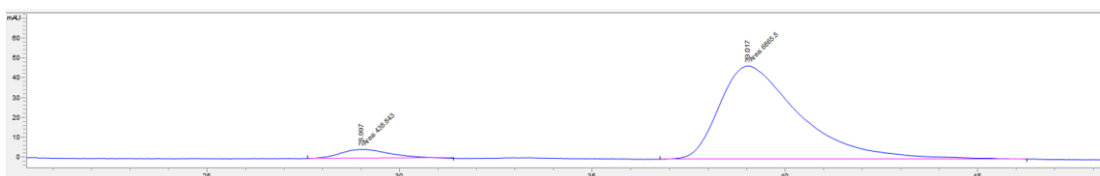

| # | 时间     | 峰面积    | 峰高   | 峰宽     | 对称因子    | 峰面积 %  | 类型   |
|---|--------|--------|------|--------|---------|--------|------|
| 1 | 28.997 | 438.8  | 4.6  | 1.5764 | 1.33E-3 | 6.008  | MM T |
| 2 | 39.017 | 6865.5 | 47.1 | 2.4272 | 7.18E-5 | 93.992 | MM T |

With (1*S*,2*R*)-L24:

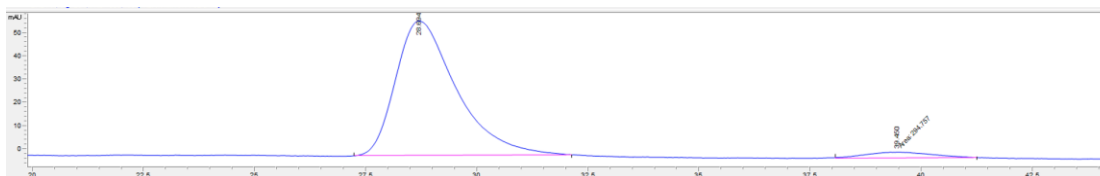

| # | 时间     | 峰面积    | 峰高  | 峰宽     | 对称因子  | 峰面积 %  | 类型 |
|---|--------|--------|-----|--------|-------|--------|----|
| 1 | 28.694 | 5507.6 | 58  | 1.1687 | 0.59  | 94.920 | BB |
| 2 | 39.45  | 294.8  | 2.7 | 1.8121 | 0.933 | 5.080  | MM |

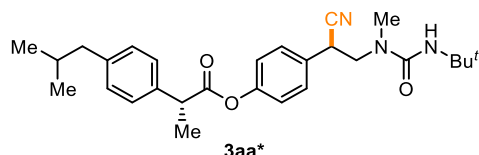

**4-(2-(3-(*tert*-Butyl)-1-methylureido)-1-cyanoethyl)phenyl (R)-2-(4-isobutylphenyl)propanoate (3aa\*):** Prepared *via* condition B from **1aa** (0.2 mmol) in 67% yield (62.1 mg) and 95:5 er as a colorless oil.

<sup>1</sup>H NMR (400 MHz, Chloroform-*d*)  $\delta$  = 7.36 (d, *J* = 8.6 Hz, 2H), 7.28 (d, *J* = 8.1 Hz, 2H), 7.14 (d, *J* = 8.1 Hz, 2H), 7.02 (d, *J* = 8.6 Hz, 2H), 4.36 (dd, *J* = 9.1, 6.3 Hz, 1H), 4.24 (s, 1H), 3.93 (q, *J* = 7.1 Hz, 1H), 3.80 (dd, *J* = 13.8, 6.3 Hz, 1H), 3.38 (dd, *J* = 13.8, 9.1 Hz, 1H), 2.88 (s, 3H), 2.47 (d, *J* = 7.2 Hz, 2H), 1.86 (dp, *J* = 13.6, 6.7 Hz, 1H), 1.60 (d, *J* = 7.2 Hz, 3H), 1.35 (s, 9H), 0.91 (d, *J* = 6.7 Hz, 6H).

<sup>13</sup>C NMR (101 MHz, Chloroform-*d*)  $\delta$  = 173.1, 156.8, 150.8, 141.0, 137.0, 130.8, 129.6 (2C), 128.7 (2C), 127.2 (2C), 122.2 (2C), 120.2, 55.5, 51.0, 45.2, 45.1, 37.0, 36.6, 30.2, 29.4 (3C), 22.4 (2C), 18.5.

**HRMS** (ESI-TOF):  $[M+Na]^+$  calcd. for C<sub>28</sub>H<sub>37</sub>N<sub>3</sub>O<sub>3</sub>Na: 486.2727, found: 486.2725.

**Chiral HPLC:** Chiralcel AD-H column, hexane:*i*PrOH (90:10), 1.0 mL/min, 220 nm, *t*<sub>R</sub> (minor) = 10.8 min, *t*<sub>R</sub> (major) = 15.9 min.

$[\alpha]_D^{21}$  = -20.0 (c = 1.0, CH<sub>2</sub>Cl<sub>2</sub>).

**Racemic sample:**

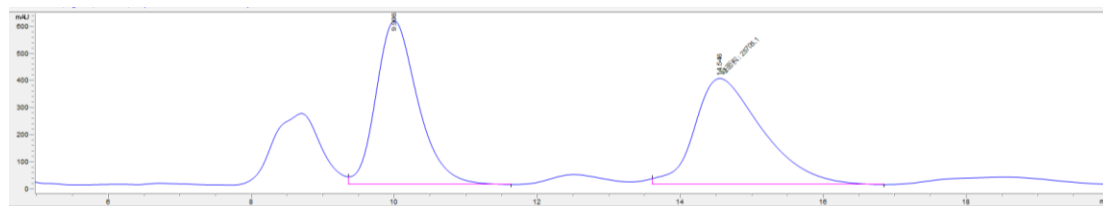

| # | 时间     | 峰面积     | 峰高    | 峰宽     | 对称因子  | 峰面积 %  | 类型 |
|---|--------|---------|-------|--------|-------|--------|----|
| 1 | 9.996  | 24444.1 | 602.2 | 0.6156 | 0.751 | 48.743 | VB |
| 2 | 14.546 | 25705.1 | 389.6 | 1.0995 | 0.586 | 51.257 | FM |

**Enriched sample:**

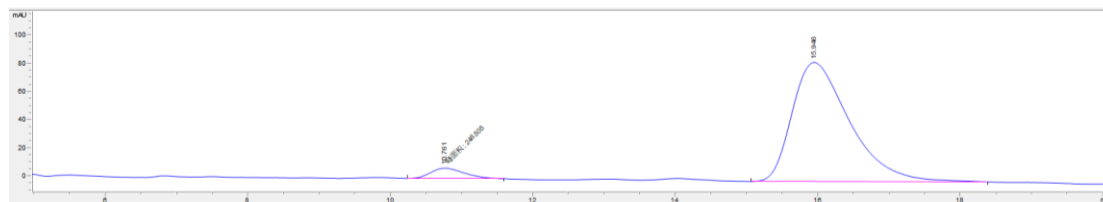

| # | 时间     | 峰面积    | 峰高   | 峰宽     | 对称因子  | 峰面积 %  | 类型   |
|---|--------|--------|------|--------|-------|--------|------|
| 1 | 10.761 | 246.5  | 7.5  | 0.5514 | 0.695 | 4.941  | MM T |
| 2 | 15.946 | 4742.8 | 84.7 | 0.8314 | 0.592 | 95.059 | BB   |

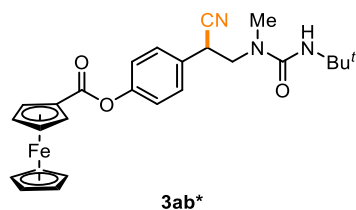

**4-(2-(3-(tert-Butyl)-1-methylureido)-1-cyanoethyl)phenyl ferrocenecarboxylate (3ab\*):** Prepared *via* condition B from **1ab** (0.2 mmol) in 51% yield (49.7 mg) and 95:5 er as a yellow brown oil.

<sup>1</sup>H NMR (400 MHz, Chloroform-*d*)  $\delta$  = 7.45 (d,  $J$  = 7.4 Hz, 2H), 7.21 (d,  $J$  = 7.2 Hz, 2H), 4.95 (d,  $J$  = 2.0 Hz, 2H), 4.51 (d,  $J$  = 2.1 Hz, 2H), 4.43–4.39 (m, 1H), 4.30 (s, 5H), 4.27 (s, 1H), 3.85 (dd,  $J$  = 12.1, 6.4 Hz, 1H), 3.42 (dd,  $J$  = 13.8, 9.0 Hz, 1H), 2.92 (s, 3H), 1.36 (s, 9H).

<sup>13</sup>C NMR (101 MHz, Chloroform-*d*)  $\delta$  = 170.2, 156.8, 150.9, 130.6, 128.8 (2C), 122.5 (2C), 120.3, 72.1 (2C), 70.7 (2C), 70.0 (5C), 69.7, 55.5, 51.0, 37.0, 36.7, 29.4 (3C).

**HRMS** (ESI-TOF):  $[M+Na]^+$  calcd. for C<sub>26</sub>H<sub>29</sub>FeN<sub>3</sub>O<sub>3</sub>Na: 510.1451, found: 510.1454.

**Chiral HPLC:** Chiralcel AD-H column, hexane:*i*PrOH (95:5), 1.0 mL/min, 220 nm,  $t_R$  (minor) = 28.6 min,  $t_R$  (major) = 31.5 min.

$[\alpha]_D^{21}$  = -32.0 (c = 1.0, CH<sub>2</sub>Cl<sub>2</sub>).

**Racemic sample:**

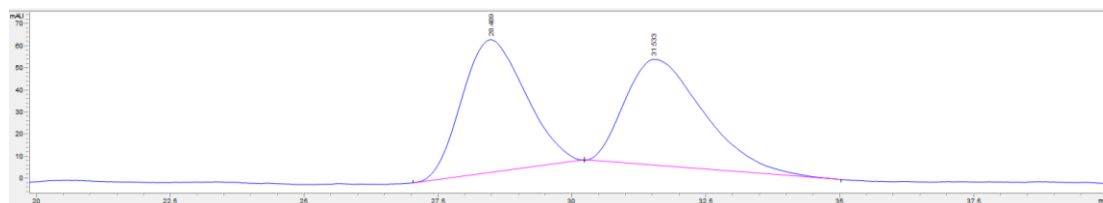

| # | 时间     | 峰面积    | 峰高   | 峰宽     | 对称因子  | 峰面积 %  | 类型 |
|---|--------|--------|------|--------|-------|--------|----|
| 1 | 28.489 | 4992.2 | 60.3 | 0.9795 | 0.838 | 50.128 | BB |
| 2 | 31.533 | 4966.6 | 48.2 | 1.2358 | 0.557 | 49.872 | BB |

**Enriched sample:**

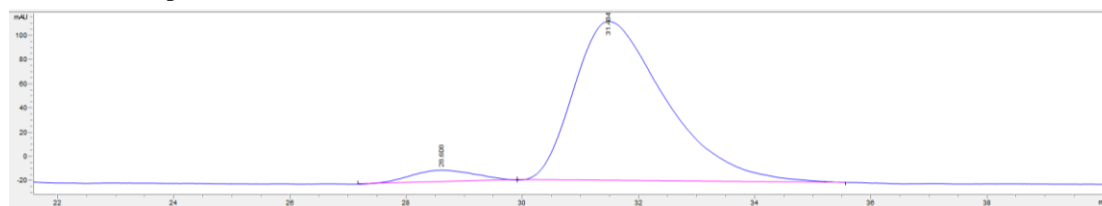

| # | 时间     | 峰面积     | 峰高    | 峰宽     | 对称因子  | 峰面积 %  | 类型 |
|---|--------|---------|-------|--------|-------|--------|----|
| 1 | 28.608 | 764.8   | 9.7   | 0.9263 | 0.962 | 5.028  | BB |
| 2 | 31.484 | 14444.2 | 131.4 | 1.3189 | 0.583 | 94.972 | BB |

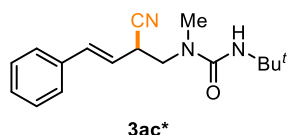

**3-(tert-Butyl)-1-(2-cyano-4-phenylbut-3-en-1-yl)-1-methylurea (3ac\*):** Prepared *via* condition B from **1ac** (0.2 mmol) in 55% yield (31.4 mg) and 93:7 er as a yellow oil.

<sup>1</sup>H NMR (400 MHz, Chloroform-*d*)  $\delta$  = 7.38–7.30 (m, 5H), 6.79–6.75 (m, 1H), 6.04 (dd, *J* = 15.9, 6.4 Hz, 1H), 4.32 (s, 1H), 3.95–3.89 (m, 1H), 3.84 (dd, *J* = 13.7, 5.6 Hz, 1H), 3.34 (dd, *J* = 13.6, 8.5 Hz, 1H), 3.03 (s, 3H), 1.34 (s, 9H).

<sup>13</sup>C NMR (101 MHz, Chloroform-*d*)  $\delta$  = 156.9, 135.6, 134.5, 128.7 (2C), 128.4, 126.6 (2C), 120.3, 119.9, 52.5 51.1, 36.8, 34.7, 29.3 (3C).

HRMS (ESI-TOF): [M+Na]<sup>+</sup> calcd. for C<sub>17</sub>H<sub>23</sub>N<sub>3</sub>ONa: 308.1733, found: 308.1741.

**Chiral HPLC:** Chiralcel OD-H column, hexane:*i*PrOH (90:10), 1.0 mL/min, 254 nm, *t<sub>R</sub>* (minor) = 12.8 min, *t<sub>R</sub>* (major) = 14.9 min. [ $\alpha$ ]<sub>D</sub><sup>21</sup> = -15.0 (c = 1.0, CH<sub>2</sub>Cl<sub>2</sub>).

**Racemic sample:**

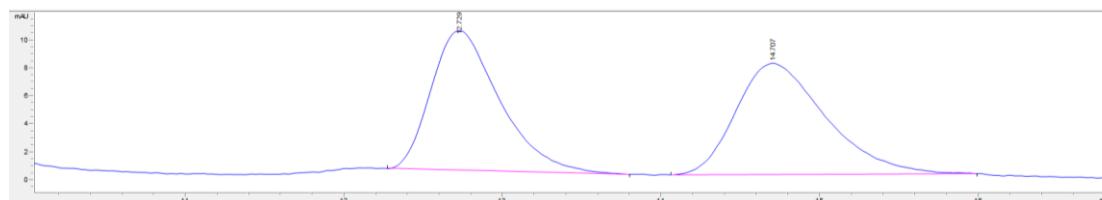

| # | 时间     | 峰面积   | 峰高  | 峰宽     | 对称因子  | 峰面积 %  | 类型 |
|---|--------|-------|-----|--------|-------|--------|----|
| 1 | 12.729 | 298.9 | 9.9 | 0.4274 | 0.675 | 48.944 | BB |
| 2 | 14.707 | 311.8 | 7.9 | 0.5278 | 0.664 | 51.056 | BB |

**Enriched sample:**

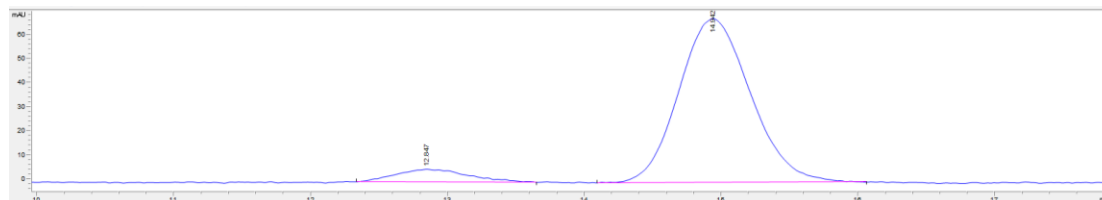

| # | 时间     | 峰面积    | 峰高   | 峰宽     | 对称因子  | 峰面积 %  | 类型  |
|---|--------|--------|------|--------|-------|--------|-----|
| 1 | 12.847 | 194.4  | 5.3  | 0.438  | 0.713 | 7.287  | BVR |
| 2 | 14.942 | 2473.4 | 67.8 | 0.4638 | 0.895 | 92.713 | BVR |

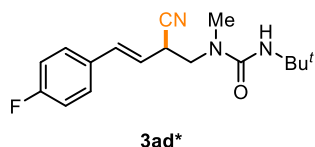

**3-(tert-Butyl)-1-(2-cyano-4-(4-fluorophenyl)but-3-en-1-yl)-1-methylurea (3ad\*):** Prepared *via* condition B from **1ad** (0.2 mmol) in 49% yield (29.7 mg) and 93:7 er as a yellow oil.

<sup>1</sup>H NMR (400 MHz, Chloroform-*d*)  $\delta$  = 7.35–7.31 (m, 2H), 7.01 (t, *J* = 8.7 Hz, 2H), 6.73 (d, *J* = 16.0 Hz, 1H), 5.96 (dd, *J* = 15.8, 6.2 Hz, 1H), 4.31 (s, 1H), 3.93–3.83 (m, 2H), 3.34 (dd, *J* = 13.3, 8.2 Hz, 1H), 3.03 (s, 3H), 1.34 (s, 9H).

<sup>13</sup>C NMR (101 MHz, Chloroform-*d*)  $\delta$  = 162.7 (d, *J* = 248.1 Hz), 156.9, 133.2, 131.8 (d, *J* = 3.5 Hz), 128.2 (d, *J* = 8.1 Hz, 2C), 120.1 (d, *J* = 2.3 Hz), 119.9, 115.7 (d, *J* = 21.7 Hz, 2C), 52.4, 51.0, 36.7, 34.7, 29.4 (3C).

<sup>19</sup>F NMR (376 MHz, Chloroform-*d*)  $\delta$  = -113.15.

HRMS (ESI-TOF): [M+Na]<sup>+</sup> calcd. for C<sub>17</sub>H<sub>22</sub>FN<sub>3</sub>ONa: 326.1639, found: 326.1637.

Chiral HPLC: Chiralcel IC column, hexane:*i*PrOH (95:5), 1.0 mL/min, 254 nm, *t<sub>R</sub>* (major) = 34.9 min, *t<sub>R</sub>* (minor) = 43.5 min. [ $\alpha$ ]<sub>D</sub><sup>21</sup> = -6.8 (c = 1.0, CH<sub>2</sub>Cl<sub>2</sub>).

**Racemic sample:**

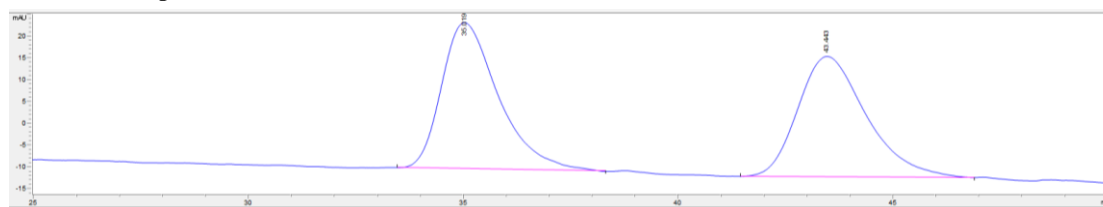

| # | 时间     | 峰面积    | 峰高   | 峰宽     | 对称因子  | 峰面积 %  | 类型 |
|---|--------|--------|------|--------|-------|--------|----|
| 1 | 35.019 | 3093.1 | 33.6 | 1.2688 | 0.634 | 50.276 | BB |
| 2 | 43.443 | 3059.1 | 27.6 | 1.329  | 0.684 | 49.724 | BB |

**Enriched sample:**

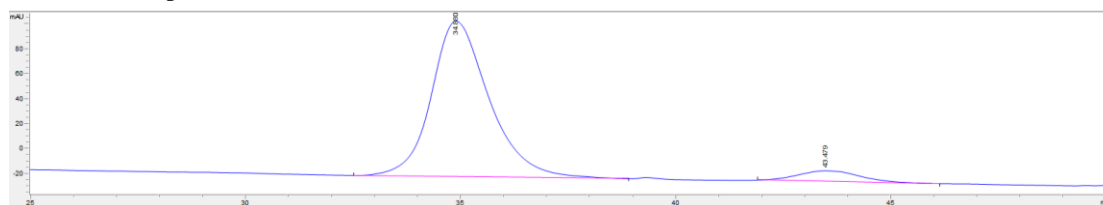

| # | 时间     | 峰面积     | 峰高    | 峰宽     | 对称因子  | 峰面积 %  | 类型 |
|---|--------|---------|-------|--------|-------|--------|----|
| 1 | 34.88  | 11686.6 | 124.7 | 1.3738 | 0.723 | 93.185 | BB |
| 2 | 43.479 | 854.7   | 8.5   | 1.1783 | 0.779 | 6.815  | BB |

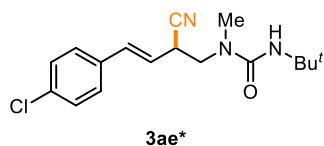

**3-(tert-Butyl)-1-(4-(4-chlorophenyl)-2-cyanobut-3-en-1-yl)-1-methylurea (3ae\*):** Prepared *via* condition B from **1ae** (0.2 mmol) in 41% yield (26.2 mg) and 91:9 er as a yellow oil.

<sup>1</sup>H NMR (400 MHz, Chloroform-*d*)  $\delta$  = 7.29 (s, 4H), 6.72 (dd, *J* = 15.8, 1.5 Hz, 1H), 6.03 (dd, *J* = 15.9, 6.3 Hz, 1H), 4.31 (s, 1H), 3.94–3.82 (m, 2H), 3.35 (dd, *J* = 13.6, 8.3 Hz, 1H), 3.03 (s, 3H), 1.33 (s, 9H).

<sup>13</sup>C NMR (101 MHz, Chloroform-*d*)  $\delta$  = 156.9, 134.1, 133.2, 128.9 (2C), 127.8 (2C), 121.1, 119.7, 52.3, 51.1, 36.7, 34.7, 29.4 (3C).

**HRMS** (ESI-TOF):  $[M+Na]^+$  calcd. for  $C_{17}H_{22}ClN_3ONa$ : 342.1344, found: 342.1352.

**Chiral HPLC**: Chiralcel IC column, hexane:*i*PrOH (90:10), 1.0 mL/min, 254 nm,  $t_R$  (major) = 17.6 min,  $t_R$  (minor) = 20.2 min.  $[\alpha]_D^{21} = -1.9$  (c = 1.0,  $CH_2Cl_2$ ).

**Racemic sample:**

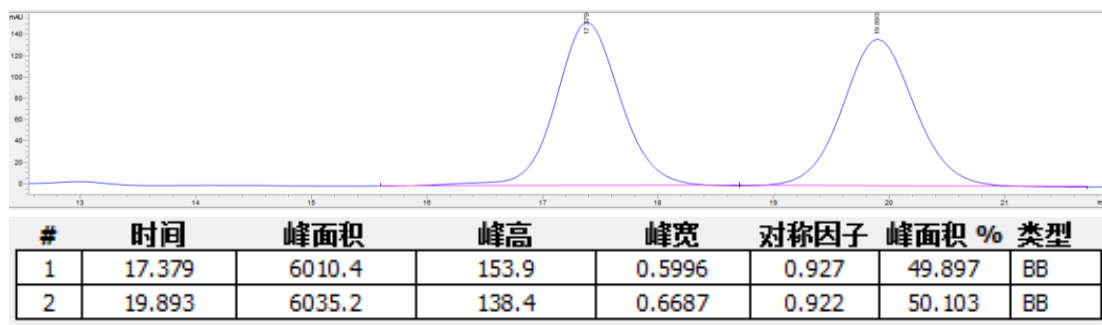

**Enriched sample:**

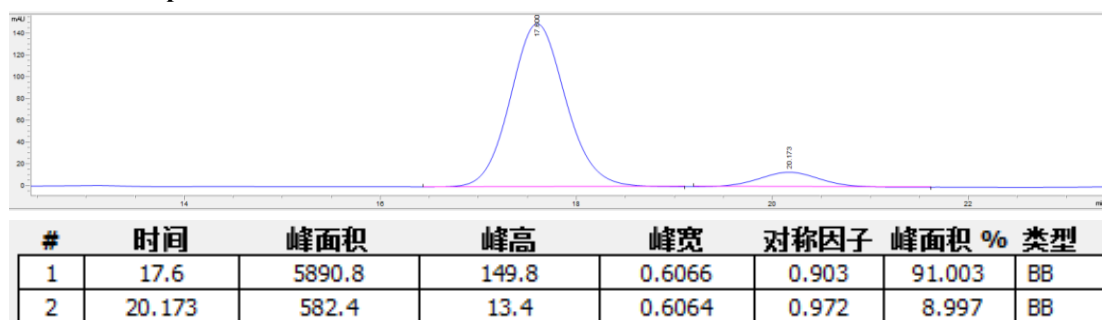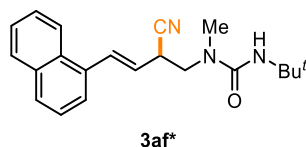

**3-(*tert*-Butyl)-1-(2-cyano-4-(naphthalen-2-yl)but-3-en-1-yl)-1-methylurea (3af\*)**: Prepared via condition B from **1af** (0.2 mmol) in 39% yield (26.2 mg) and 90:10 er as a yellow oil.

**$^1H$  NMR** (400 MHz, Chloroform-*d*)  $\delta$  = 8.08 (d,  $J$  = 8.1 Hz, 1H), 7.83 (dd,  $J$  = 18.6, 7.9 Hz, 2H), 7.56–7.49 (m, 4H), 7.44 (t,  $J$  = 7.7 Hz, 1H), 6.09 (dd,  $J$  = 15.6, 6.5 Hz, 1H), 4.34 (s, 1H), 4.05 (q,  $J$  = 6.7 Hz, 1H), 3.91 (dd,  $J$  = 13.8, 5.8 Hz, 1H), 3.46 (dd,  $J$  = 13.8, 8.5 Hz, 1H), 3.06 (s, 3H), 1.35 (s, 9H).

**$^{13}C$  NMR** (101 MHz, Chloroform-*d*)  $\delta$  = 156.9, 133.5, 133.4, 132.0, 131.0, 128.7, 128.6, 126.4, 126.0, 125.6, 124.3, 123.6, 123.6, 119.9, 52.5, 51.1, 36.9, 35.0, 29.4 (3C).

**HRMS** (ESI-TOF):  $[M+Na]^+$  calcd. for  $C_{21}H_{25}N_3ONa$ : 358.1890, found: 358.1888.

**Chiral HPLC**: Chiralcel OJ-H column, hexane:*i*PrOH (90:10), 1.0 mL/min, 230 nm,  $t_R$  (minor) = 37.5 min,  $t_R$  (minor) = 40.4 min.  $[\alpha]_D^{21} = -1.8$  (c = 1.0,  $CH_2Cl_2$ ).

**Racemic sample:**

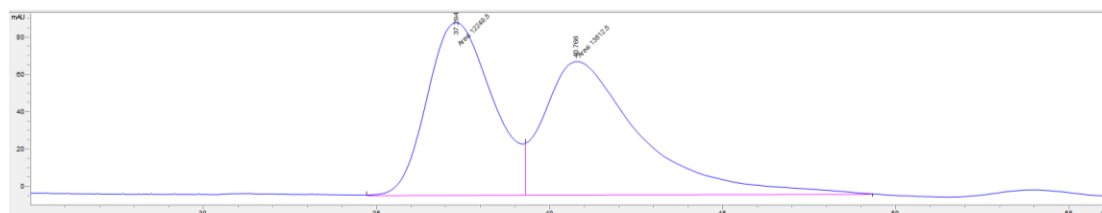

| # | 时间     | 峰面积     | 峰高   | 峰宽     | 对称因子  | 峰面积 %  | 类型  |
|---|--------|---------|------|--------|-------|--------|-----|
| 1 | 37.294 | 12249.5 | 92.8 | 2.3204 | 0     | 47.001 | MFT |
| 2 | 40.766 | 13812.5 | 71.7 | 3.2092 | 0.487 | 52.999 | FMT |

Enriched sample:

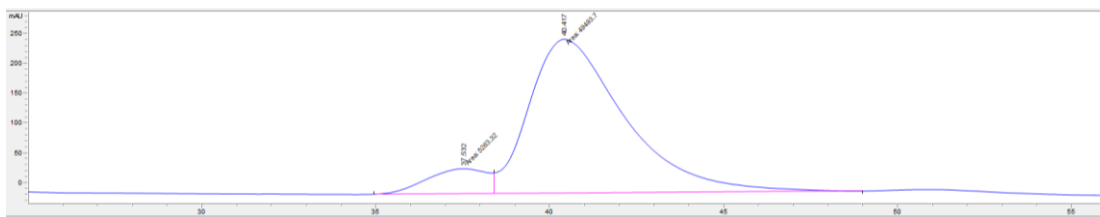

| # | 时间     | 峰面积     | 峰高    | 峰宽     | 对称因子  | 峰面积 %  | 类型  |
|---|--------|---------|-------|--------|-------|--------|-----|
| 1 | 37.532 | 5263.3  | 42.6  | 2.0606 | 1.431 | 9.612  | MFT |
| 2 | 40.417 | 49493.7 | 259.2 | 3.1822 | 0.566 | 90.388 | FMT |

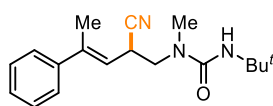

3ag\*

**3-(*tert*-Butyl)-1-(2-cyano-4-phenylpent-3-en-1-yl)-1-methylurea (3ag\*):** Prepared *via* condition B from **1ag** (0.2 mmol) in 53% yield (31.7 mg) and 94:6 er as a yellow oil.

<sup>1</sup>H NMR (400 MHz, Chloroform-*d*)  $\delta$  = 7.37–7.29 (m, 5H), 5.60 (d,  $J$  = 9.2 Hz, 1H), 4.30 (s, 1H), 4.12 (q,  $J$  = 8.7 Hz, 1H), 3.73 (dd,  $J$  = 13.8, 6.8 Hz, 1H), 3.40 (dd,  $J$  = 13.8, 8.6 Hz, 1H), 3.00 (s, 3H), 2.14 (s, 3H), 1.36 (s, 9H).

<sup>13</sup>C NMR (101 MHz, Chloroform-*d*)  $\delta$  = 156.9, 142.0, 141.9, 128.4 (2C), 127.9, 125.9 (2C), 120.5, 118.5, 52.3, 51.0, 37.0, 30.7, 29.4 (3C), 16.6.

HRMS (ESI-TOF):  $[M+Na]^+$  calcd. for C<sub>18</sub>H<sub>25</sub>N<sub>3</sub>ONa: 322.1890, found: 322.1879.

Chiral HPLC: Chiralcel IC column, hexane:*i*PrOH (95:5), 1.0 mL/min, 254 nm,  $t_R$  (major) = 15.5 min,  $t_R$  (minor) = 19.2 min.  $[\alpha]_D^{21}$  = -2.3 (c = 1.0, CH<sub>2</sub>Cl<sub>2</sub>).

Racemic sample:

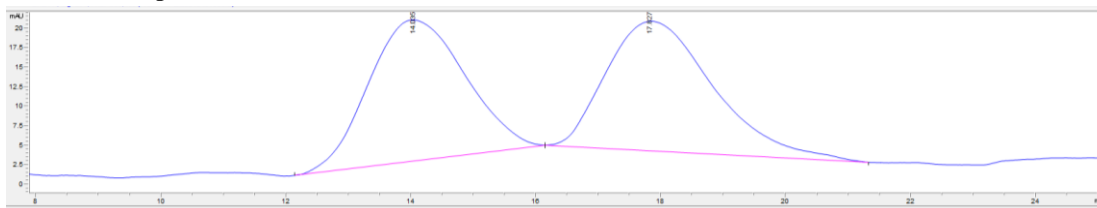

| # | 时间     | 峰面积    | 峰高   | 峰宽     | 对称因子  | 峰面积 %  | 类型 |
|---|--------|--------|------|--------|-------|--------|----|
| 1 | 14.035 | 1931   | 18   | 1.3024 | 0.867 | 49.649 | BB |
| 2 | 17.827 | 1958.4 | 16.5 | 1.4045 | 0.67  | 50.351 | BB |

Enriched sample:

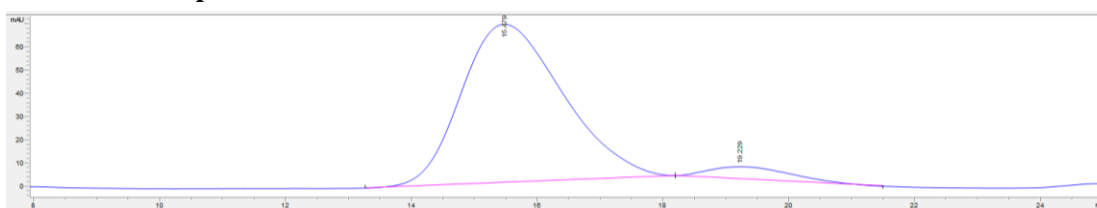

| # | 时间     | 峰面积    | 峰高   | 峰宽     | 对称因子  | 峰面积 %  | 类型 |
|---|--------|--------|------|--------|-------|--------|----|
| 1 | 15.479 | 7656.5 | 68.3 | 1.6387 | 0.721 | 93.985 | BB |
| 2 | 19.229 | 490.1  | 5.3  | 1.086  | 0.564 | 6.015  | BB |

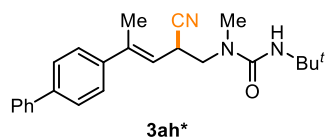

**1-(4-([1,1'-Biphenyl]-4-yl)-2-cyanopent-3-en-1-yl)-3-(*tert*-butyl)-1-methylurea (3ah\*)**: Prepared *via* condition B from **1ah** (0.2 mmol) in 43% yield (32.3 mg) and 92:8 er as a yellow oil.

<sup>1</sup>H NMR (400 MHz, Chloroform-*d*)  $\delta$  = 7.37–7.29 (m, 5H), 5.60 (d,  $J$  = 9.2 Hz, 1H), 4.30 (s, 1H), 4.12 (q,  $J$  = 8.7 Hz, 1H), 3.73 (dd,  $J$  = 13.8, 6.8 Hz, 1H), 3.40 (dd,  $J$  = 13.8, 8.6 Hz, 1H), 3.00 (s, 3H), 2.14 (s, 3H), 1.36 (s, 9H).

<sup>13</sup>C NMR (101 MHz, Chloroform-*d*)  $\delta$  = 156.9, 142.0, 141.9, 128.4 (2C), 127.9, 125.9 (2C), 120.5, 118.5, 52.3, 51.0, 37.0, 30.7, 29.4 (3C), 16.6.

HRMS (ESI-TOF):  $[M+Na]^+$  calcd. for C<sub>24</sub>H<sub>29</sub>N<sub>3</sub>ONa: 398.2203, found: 398.2199.

Chiral HPLC: Chiralcel IC column, hexane:*i*PrOH (85:15), 1.0 mL/min, 254 nm,  $t_R$  (major) = 22.1 min,  $t_R$  (minor) = 25.2min.  $[\alpha]_D^{21}$  = -7.9 (c = 1.0, CH<sub>2</sub>Cl<sub>2</sub>).

Racemic sample:

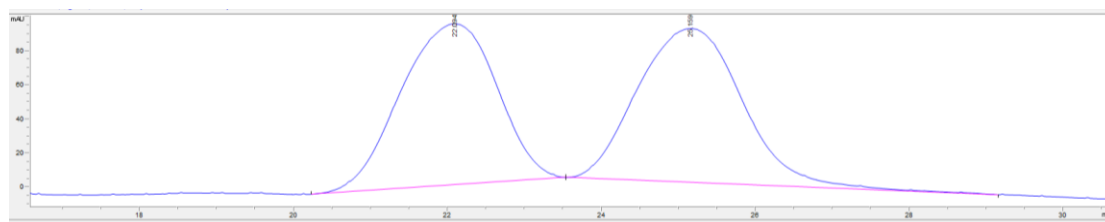

| # | 时间     | 峰面积    | 峰高   | 峰宽     | 对称因子  | 峰面积 %  | 类型   |
|---|--------|--------|------|--------|-------|--------|------|
| 1 | 22.094 | 8182.6 | 94.2 | 1.027  | 1.272 | 49.014 | BB   |
| 2 | 25.159 | 8511.8 | 90   | 1.1715 | 0.964 | 50.986 | BV R |

Enriched sample:

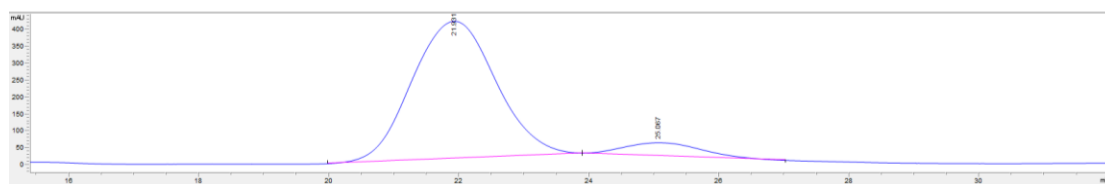

| # | 时间     | 峰面积     | 峰高    | 峰宽     | 对称因子  | 峰面积 %  | 类型 |
|---|--------|---------|-------|--------|-------|--------|----|
| 1 | 21.931 | 36317.9 | 406.4 | 1.3945 | 0.998 | 91.897 | BB |
| 2 | 25.067 | 3202.4  | 38.7  | 1.0342 | 0.751 | 8.103  | BB |

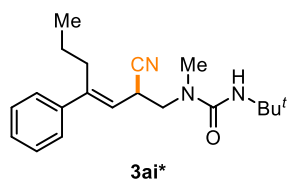

**3-(*tert*-Butyl)-1-(2-cyano-4-phenylhept-3-en-1-yl)-1-methylurea (3ai\*)**: Prepared *via* condition B from **1ai** (0.2 mmol) in 41% yield (26.9 mg) and 87:13 er as a colorless oil.

<sup>1</sup>H NMR (600 MHz, Chloroform-*d*)  $\delta$  = 7.34–7.27 (m, 5H), 5.46 (d,  $J$  = 9.6 Hz, 1H), 4.29 (s, 1H), 4.11–

4.06 (m, 1H), 3.66 (dd,  $J = 13.8, 7.0$  Hz, 1H), 3.46 (dd,  $J = 13.8, 8.1$  Hz, 1H), 2.99 (s, 3H), 2.57–2.47 (m, 2H), 1.36 (s, 9H), 1.41–1.33 (m, 2H), 0.89 (t,  $J = 7.4$  Hz, 3H).

$^{13}\text{C}$  NMR (101 MHz, Chloroform- $d$ )  $\delta = 156.8, 147.2, 141.4, 128.4$  (2C), 127.7, 126.6 (2C), 120.4, 119.2, 52.5, 51.0, 37.0, 32.2, 30.5, 29.4 (3C), 21.5, 13.8.

HRMS (ESI-TOF):  $[\text{M}+\text{Na}]^+$  calcd. for  $\text{C}_{20}\text{H}_{29}\text{N}_3\text{ONa}$ : 350.2203, found: 350.2210.

Chiral HPLC: Chiralcel IC column, hexane:*i*PrOH (90:10), 1.0 mL/min, 254 nm,  $t_{\text{R}}$  (minor) = 18.4 min,  $t_{\text{R}}$  (major) = 23.7 min.  $[\alpha]_{\text{D}}^{21} = -8.1$  ( $c = 1.0, \text{CH}_2\text{Cl}_2$ ).

#### Racemic sample:

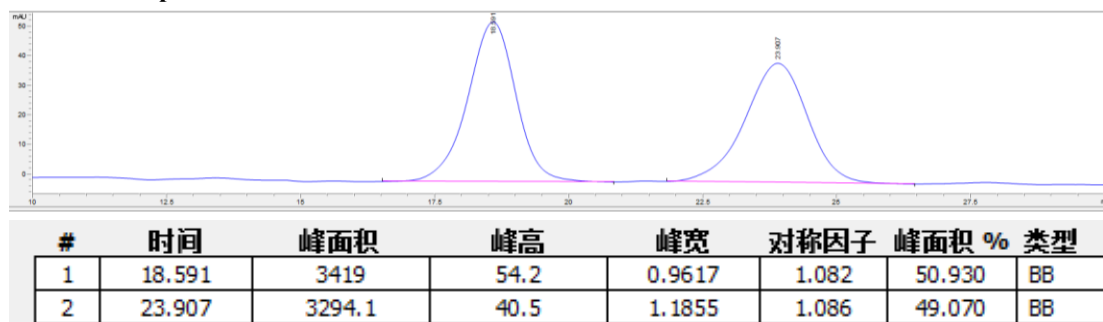

#### Enriched sample:

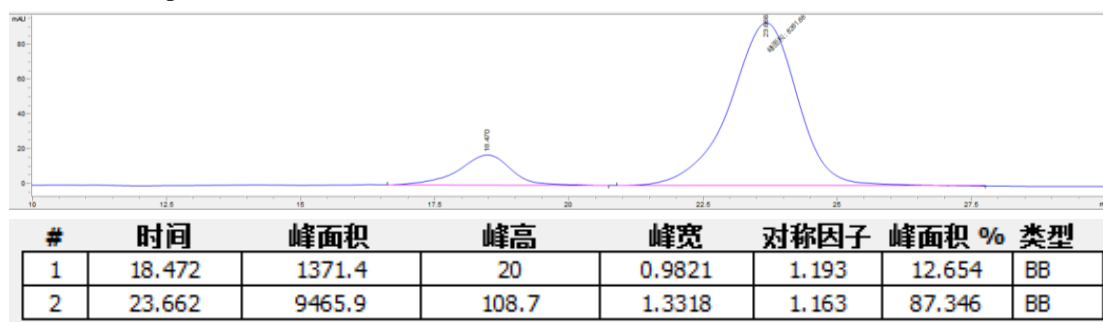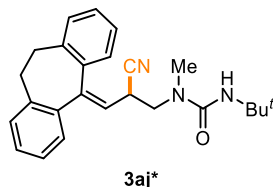

**3-(*tert*-Butyl)-1-(2-cyano-3-(10,11-dihydro-5H-dibenzo[*a,d*][7]annulen-5-ylidene)propyl)-1-methylurea (3aj\*)**: Prepared *via* condition B from **1aj** (0.2 mmol) in 57% yield (44.1 mg) and 89:11 er as a colorless oil (major isomer : minor isomer = 1.25 : 1).

Major isomer:

$^1\text{H}$  NMR (400 MHz, Chloroform- $d$ )  $\delta = 7.34\text{--}7.04$  (m, 8H), 5.78 (d,  $J = 10.0$  Hz, 1H), 4.18 (s, 1H), 3.82–3.69 (m, 2H), 3.62–3.26 (m, 3H), 3.00–2.93 (m, 1H), 2.81–2.75 (m, 1H), 2.68 (s, 3H), 1.23 (s, 9H).

$^{13}\text{C}$  NMR (101 MHz, Chloroform- $d$ )  $\delta = 156.6, 149.4, 139.4, 139.1, 138.2, 137.1, 130.2, 128.5$  (2C), 128.4, 128.1, 127.7, 126.5, 126.4, 121.6, 119.8, 51.4, 50.9, 35.4, 33.6, 31.9, 31.1, 29.3 (3C).

Minor isomer:

$^1\text{H}$  NMR (400 MHz, Chloroform- $d$ )  $\delta = 7.34\text{--}7.04$  (m, 8H), 5.74 (d,  $J = 9.4$  Hz, 1H), 4.37 (s, 1H), 3.82–3.69 (m, 2H), 3.62–3.26 (m, 3H), 3.04 (s, 3H), 3.00–2.93 (m, 1H), 2.81–2.75 (m, 1H), 1.40 (s, 9H).

$^{13}\text{C}$  NMR (101 MHz, Chloroform- $d$ )  $\delta = 156.8, 148.9, 139.3, 139.1, 138.5, 137.2, 130.4, 128.6, 128.5$  (2C), 128.4, 128.0, 126.9, 126.2, 121.7, 119.5, 51.3, 50.9, 36.4, 33.6, 31.7, 31.2, 29.4 (3C).

HRMS (ESI-TOF):  $[\text{M}+\text{Na}]^+$  calcd. for  $\text{C}_{25}\text{H}_{29}\text{N}_3\text{ONa}$ : 410.2203, found: 410.2202.



**Chiral HPLC:** Chiralcel AD-H column, hexane:*i*PrOH (95:5), 1.0 mL/min, 254 nm,  $t_R$  (major) = 11.7 min,  $t_R$  (minor) = 14.6 min.  $[\alpha]_D^{21} = -1.8$  (c = 1.0, CH<sub>2</sub>Cl<sub>2</sub>).

**Racemic sample:**

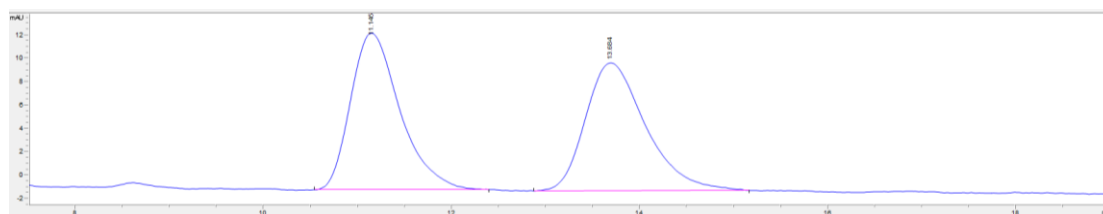

| # | 时间     | 峰面积   | 峰高   | 峰宽     | 对称因子  | Area%  | Type |
|---|--------|-------|------|--------|-------|--------|------|
| 1 | 11.145 | 487.6 | 13.4 | 0.5593 | 0.696 | 50.086 | BB   |
| 2 | 13.684 | 485.9 | 10.9 | 0.6325 | 0.687 | 49.914 | BB   |

**Enriched sample:**

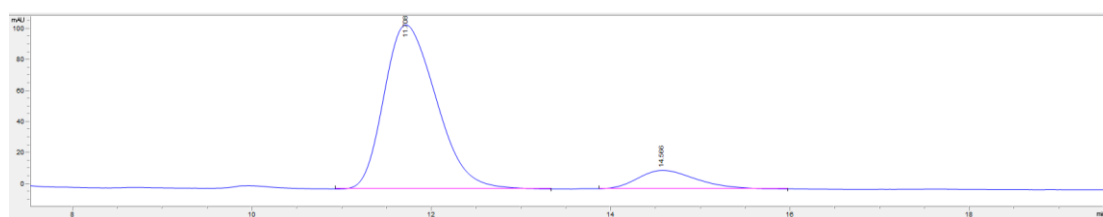

| # | 时间     | 峰面积    | 峰高    | 峰宽     | 对称因子  | 峰面积 %  | 类型 | Area%  | Type |
|---|--------|--------|-------|--------|-------|--------|----|--------|------|
| 1 | 11.708 | 4267.2 | 105.7 | 0.6329 | 0.684 | 88.933 | BB | 88.933 | BB   |
| 2 | 14.566 | 531    | 11.8  | 0.5919 | 0.691 | 11.067 | BB | 11.067 | BB   |

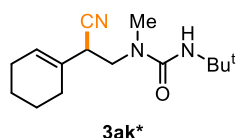

**3-(*tert*-Butyl)-1-(2-cyano-2-(cyclohex-1-en-1-yl)ethyl)-1-methylurea (3ak\*):** Prepared *via* condition B from **1ak** (0.2 mmol) in 34% yield (17.9 mg) and 78:22 er as a colorless oil.

<sup>1</sup>H NMR (600 MHz, Chloroform-*d*)  $\delta$  = 5.80–5.78 (m, 1H), 4.27 (s, 1H), 3.80 (dd,  $J$  = 13.9, 5.9 Hz, 1H), 3.55–3.50 (m, 1H), 3.22 (dd,  $J$  = 13.8, 8.8 Hz, 1H), 2.97 (s, 3H), 2.05–1.99 (m, 4H), 1.67–1.63 (m, 2H), 1.58–1.53 (m, 2H), 1.34 (s, 9H).

<sup>13</sup>C NMR (101 MHz, Chloroform-*d*)  $\delta$  = 156.8, 129.9, 127.3, 120.4, 51.3, 50.9, 38.9, 36.5, 29.4 (3C), 26.4, 25.2, 22.5, 21.8.

**HRMS** (ESI-TOF):  $[M+Na]^+$  calcd. for C<sub>15</sub>H<sub>25</sub>N<sub>3</sub>ONa: 286.1890, found: 286.1887.

**Chiral HPLC:** Chiralcel OD-H column, hexane:*i*PrOH (90:10), 1.0 mL/min, 220 nm,  $t_R$  (minor) = 6.1 min,  $t_R$  (major) = 6.8 min.  $[\alpha]_D^{21} = -4.3$  (c = 1.0, CH<sub>2</sub>Cl<sub>2</sub>).

**Racemic sample:**

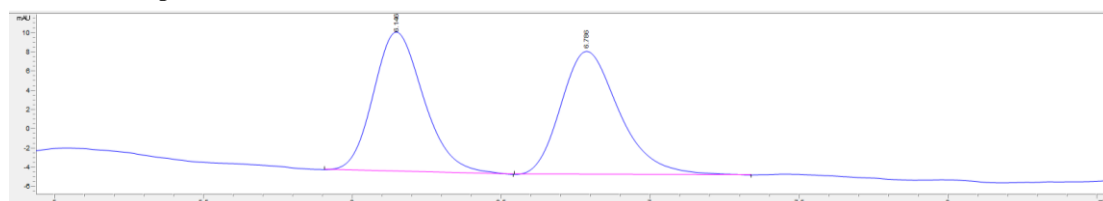

| # | 时间    | 峰面积   | 峰高   | 峰宽     | 对称因子  | 峰面积 %  | 类型 |
|---|-------|-------|------|--------|-------|--------|----|
| 1 | 6.146 | 170.3 | 14.5 | 0.1814 | 0.79  | 49.365 | BB |
| 2 | 6.786 | 174.6 | 12.8 | 0.2113 | 0.738 | 50.635 | BB |

#### Enriched sample:

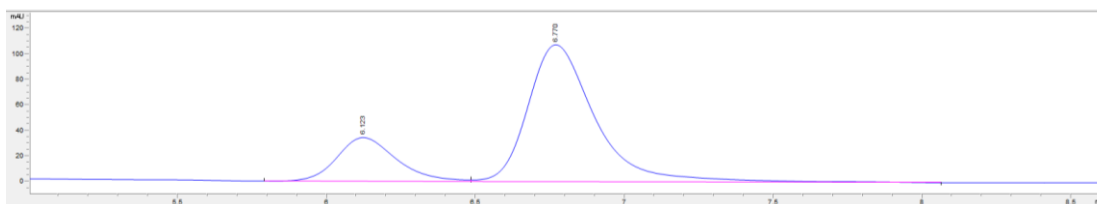

| # | 时间    | 峰面积    | 峰高    | 峰宽     | 对称因子  | 峰面积 %  | 类型 |
|---|-------|--------|-------|--------|-------|--------|----|
| 1 | 6.123 | 476    | 34.2  | 0.2123 | 0.756 | 21.982 | BV |
| 2 | 6.77  | 1689.4 | 107.2 | 0.2379 | 0.65  | 78.018 | VB |

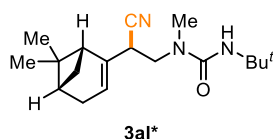

**3-(*tert*-Butyl)-1-(2-cyano-2-((1*R*,5*S*)-6,6-dimethylbicyclo[3.1.1]hept-2-en-2-yl)ethyl)-1-methylurea (3al\*):** Prepared *via* condition B from **1al** (0.2 mmol) in 37% yield (22.5 mg) and 80:20 er as a colorless oil (major isomer : minor isomer = 4 : 1).

Major isomer:

**<sup>1</sup>H NMR** (400 MHz, Chloroform-*d*)  $\delta$  = 5.70 (s, 1H), 4.29 (s, 1H), 3.91 (dd,  $J$  = 13.8, 4.7 Hz, 1H), 3.63–3.59 (m, 1H), 3.02 (s, 3H), 2.94 (dd,  $J$  = 13.8, 10.5 Hz, 1H), 2.46–2.40 (m, 1H), 2.34–2.20 (m, 3H), 2.12–2.07 (td,  $J$  = 5.7, 2.8 Hz, 1H), 1.35 (s, 9H), 1.29 (s, 3H), 1.15 (d,  $J$  = 8.8 Hz, 1H), 0.82 (s, 3H).

**<sup>13</sup>C NMR** (101 MHz, Chloroform-*d*)  $\delta$  = 156.9, 139.7, 121.9, 120.3, 51.4, 51.0, 44.5, 40.4, 38.2, 38.1, 36.8, 31.8, 31.3, 29.4 (3C), 26.0, 21.2.

Minor isomer:

**<sup>1</sup>H NMR** (400 MHz, Chloroform-*d*)  $\delta$  = 5.70 (s, 1H), 4.29 (s, 1H), 3.87 (dd,  $J$  = 14.0, 5.6 Hz, 1H), 3.69–3.65 (m, 1H), 3.00 (s, 3H), 2.95 (dd,  $J$  = 13.8, 10.0 Hz, 1H), 2.46–2.40 (m, 1H), 2.34–2.20 (m, 3H), 2.12–2.07 (td,  $J$  = 5.7, 2.8 Hz, 1H), 1.35 (s, 9H), 1.29 (s, 3H), 1.14 (d,  $J$  = 8.8 Hz, 1H), 0.83 (s, 3H).

**<sup>13</sup>C NMR** (101 MHz, Chloroform-*d*)  $\delta$  = 156.8, 139.5, 122.2, 120.0, 51.2, 51.0, 44.1, 40.4, 38.2, 37.9, 36.7, 31.7, 31.3, 29.4 (3C), 25.9, 21.1.

**HRMS** (ESI-TOF):  $[M+Na]^+$  calcd. for C<sub>18</sub>H<sub>29</sub>N<sub>3</sub>ONa: 326.2203, found: 326.2208.

**Chiral HPLC:** Chiralcel IF column, hexane:*i*PrOH (95:5), 1.0 mL/min, 220 nm,  $t_R$  (major) = 8.7 min,  $t_R$  (minor) = 11.3 min.  $[\alpha]_D^{21} = -7.1$  (c = 1.0, CH<sub>2</sub>Cl<sub>2</sub>).

#### Racemic sample:

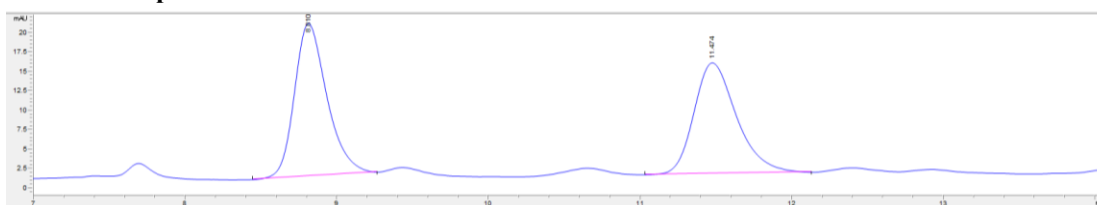

| # | 时间     | 峰面积   | 峰高   | 峰宽     | 对称因子  | 峰面积 %  | 类型 |
|---|--------|-------|------|--------|-------|--------|----|
| 1 | 8.81   | 293   | 19.7 | 0.2254 | 0.728 | 51.238 | BB |
| 2 | 11.474 | 278.9 | 14.3 | 0.2976 | 0.719 | 48.762 | BB |

#### Enriched sample:

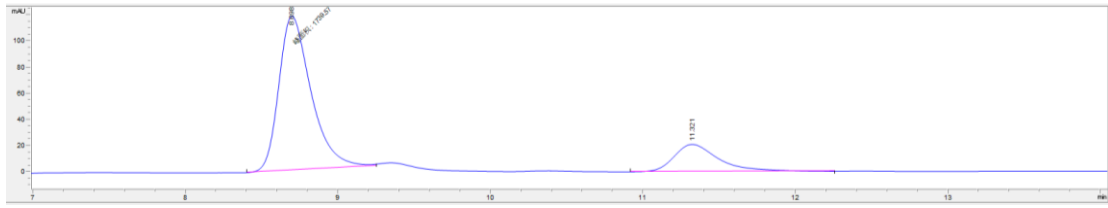

| # | 时间     | 峰面积    | 峰高    | 峰宽     | 对称因子  | 峰面积 %  | 类型 |
|---|--------|--------|-------|--------|-------|--------|----|
| 1 | 8.698  | 1739.6 | 118.3 | 0.2452 | 0.663 | 80.240 | MM |
| 2 | 11.321 | 428.4  | 20.9  | 0.3072 | 0.628 | 19.760 | BB |

## 8. X-Ray Data for 2d and 3k

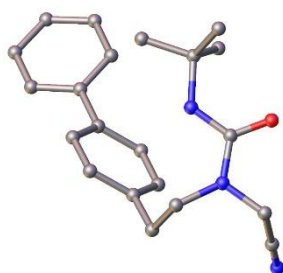

**Figure S11.** X-Ray crystal data of **2d**

**Table S7.** Crystal data and structure refinement for **2d**

|                                           |                                                               |
|-------------------------------------------|---------------------------------------------------------------|
| Identification code                       | cu_0414_6_0m                                                  |
| Empirical formula                         | C <sub>21</sub> H <sub>25</sub> N <sub>3</sub> O              |
| Formula weight                            | 335.44                                                        |
| Temperature/K                             | 150.00                                                        |
| Crystal system                            | monoclinic                                                    |
| Space group                               | C2/c                                                          |
| a/Å                                       | 31.7800(8)                                                    |
| b/Å                                       | 6.1176(1)                                                     |
| c/Å                                       | 19.0293(5)                                                    |
| $\alpha$ /°                               | 90                                                            |
| $\beta$ /°                                | 90.186(2)                                                     |
| $\gamma$ /°                               | 90                                                            |
| Volume/Å <sup>3</sup>                     | 3699.61(15)                                                   |
| Z                                         | 8                                                             |
| $\rho_{\text{calc}}/\text{cm}^3$          | 1.204                                                         |
| $\mu/\text{mm}^{-1}$                      | 0.590                                                         |
| F(000)                                    | 1440.0                                                        |
| Crystal size/mm <sup>3</sup>              | 0.2 × 0.15 × 0.1                                              |
| Radiation                                 | CuK $\alpha$ ( $\lambda$ = 1.54178)                           |
| 2 $\theta$ range for data collection/°    | 5.562 to 144.242                                              |
| Index ranges                              | -38 ≤ h ≤ 37, -7 ≤ k ≤ 7, -23 ≤ l ≤ 23                        |
| Reflections collected                     | 16077                                                         |
| Independent reflections                   | 3583 [R <sub>int</sub> = 0.0408, R <sub>sigma</sub> = 0.0313] |
| Data/restraints/parameters                | 3583/0/229                                                    |
| Goodness-of-fit on F <sup>2</sup>         | 1.046                                                         |
| Final R indexes [I >= 2 $\sigma$ (I)]     | R <sub>1</sub> = 0.0399, wR <sub>2</sub> = 0.1027             |
| Final R indexes [all data]                | R <sub>1</sub> = 0.0459, wR <sub>2</sub> = 0.1082             |
| Large diff. peak/hole / e Å <sup>-3</sup> | 0.27/-0.33                                                    |

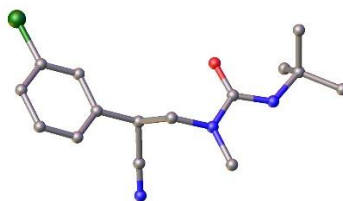

**Figure S12.** X-Ray crystal data of **3k**

**Table S8.** Crystal data and structure refinement for **3k**

|                                             |                                                               |
|---------------------------------------------|---------------------------------------------------------------|
| Identification code                         | cu_0508_8_0ma                                                 |
| Empirical formula                           | C <sub>15</sub> H <sub>20</sub> ClN <sub>3</sub> O            |
| Formula weight                              | 293.79                                                        |
| Temperature/K                               | 150.00                                                        |
| Crystal system                              | orthorhombic                                                  |
| Space group                                 | Pbca                                                          |
| a/Å                                         | 16.0770(3)                                                    |
| b/Å                                         | 10.3211(2)                                                    |
| c/Å                                         | 18.8000(4)                                                    |
| $\alpha$ /°                                 | 90                                                            |
| $\beta$ /°                                  | 90                                                            |
| $\gamma$ /°                                 | 90                                                            |
| Volume/Å <sup>3</sup>                       | 3119.53(11)                                                   |
| Z                                           | 8                                                             |
| $\rho_{\text{calc}}$ /cm <sup>3</sup>       | 1.251                                                         |
| $\mu$ /mm <sup>-1</sup>                     | 2.160                                                         |
| F(000)                                      | 1248.0                                                        |
| Crystal size/mm <sup>3</sup>                | 0.2 × 0.15 × 0.1                                              |
| Radiation                                   | CuK $\alpha$ ( $\lambda$ = 1.54178)                           |
| 2 $\theta$ range for data collection/°      | 9.408 to 149.186                                              |
| Index ranges                                | -20 ≤ h ≤ 16, -12 ≤ k ≤ 11, -23 ≤ l ≤ 19                      |
| Reflections collected                       | 19520                                                         |
| Independent reflections                     | 3191 [R <sub>int</sub> = 0.0380, R <sub>sigma</sub> = 0.0261] |
| Data/restraints/parameters                  | 3191/0/185                                                    |
| Goodness-of-fit on F <sup>2</sup>           | 1.081                                                         |
| Final R indexes [I ≥ 2 $\sigma$ (I)]        | R <sub>1</sub> = 0.0674, wR <sub>2</sub> = 0.1710             |
| Final R indexes [all data]                  | R <sub>1</sub> = 0.0736, wR <sub>2</sub> = 0.1824             |
| Largest diff. peak/hole / e Å <sup>-3</sup> | 0.55/-0.18                                                    |

## 9. References

1. Zhao, L. *et al.* Directed Nickel-catalyzed diastereoselective reductive difunctionalization of alkenyl amines. *Org. Lett.* **23**, 8516-8521 (2021).
2. Zhang, J., Jacobson, A., Rusche, J. R. & Herlihy, W. Unique structures generated by Ugi 3CC reactions using bifunctional starting materials containing aldehyde and carboxylic acid. *J. Org. Chem.* **64**, 1074-1076 (1999).
3. Nielsen, C. D. T. *et al.* Reversibility and reactivity in an acid catalyzed cyclocondensation to give furanochromanes – a reaction at the ‘oxonium-Prins’ vs. ‘ortho-quinone methide cycloaddition’ mechanistic nexus. *Chem. Sci.* **10**, 406-412 (2019).
4. Lei, J. *et al.* Copper-catalyzed trifluoromethylation of trisubstituted allylic and homoallylic alcohols. *Chem. Eur. J.* **21**, 6700-6703 (2015).
5. Zhan, M., Zhang, T., Huang, H., Xie, Y. & Chen, Y. A simple method for  $\alpha$ -position deuterated carbonyl compounds with pyrrolidine as catalyst. *J. Label. Compd. Radiopharm.* **57**, 533-539 (2014).
6. Singh, R., Kolev, J. N., Sutura, P. A. & Fasan, R. Enzymatic C(sp<sup>3</sup>)-H amination: P450-catalyzed conversion of carbonazidates into oxazolidinones. *ACS Catal.* **5**, 1685-1691 (2015).
7. Liu, C. *et al.* Enantioselective synthesis of 3a-amino-pyrroloindolines by copper-catalyzed direct asymmetric dearomative amination of tryptamines. *Angew. Chem. Int. Ed.* **55**, 751-754 (2016).
8. Zeng, X. *et al.* Copper-catalyzed, chloroamide-directed benzylic C–H difluoromethylation. *J. Am. Chem. Soc.* **141**, 19941-19949 (2019).
9. Shen, Y., Funez-Ardoiz, I., Schoenebeck, F. & Rovis, T. Site-selective  $\alpha$ -C–H functionalization of trialkylamines *via* reversible hydrogen atom transfer catalysis. *J. Am. Chem. Soc.* **143**, 18952-18959 (2021).
10. Bower, J. K. *et al.* C(sp<sup>3</sup>)-H cyanation by a formal copper(III) cyanide complex. *Chem. Sci.* **14**, 1301-1307 (2023).
11. Zhang, Z., Zhang, X. & Nagib, D. A. Chiral piperidines from acyclic amines *via* enantioselective, radical-mediated  $\delta$  C–H cyanation. *Chem* **5**, 3127-3134 (2019).
12. Kim, K. & Hong, S. H. Photoinduced copper(I)-catalyzed cyanation of aromatic halides at room temperature. *Adv. Synth. Catal.* **359**, 2345-2351 (2017).
13. Ratani, T. S., Bachman, S., Fu, G. C. & Peters, J. C. Photoinduced, copper-catalyzed carbon–carbon bond formation with alkyl electrophiles: cyanation of unactivated secondary alkyl chlorides at room temperature. *J. Am. Chem. Soc.* **137**, 13902-13907 (2015).
14. Moriyama, K., Kuramochi, M., Fujii, K., Morita, T. & Togo, H. Nitroxyl-radical-catalyzed oxidative coupling of amides with silylated nucleophiles through *N*-halogenation. *Angew. Chem., Int. Ed.* **55**, 14546-14551 (2016).
15. Yamaguchi, K., Wang, Y. & Mizuno, N. A widely applicable regioselective aerobic  $\alpha$ -cyanation of tertiary amines heterogeneously catalyzed by manganese oxides. *ChemCatChem* **5**, 2835-2838 (2013).
16. Blanksby, S. J. & Ellison, G. B. Bond dissociation energies of organic molecules. *Acc. Chem. Res.* **36**, 255-263 (2003).

## 10. NMR Spectra

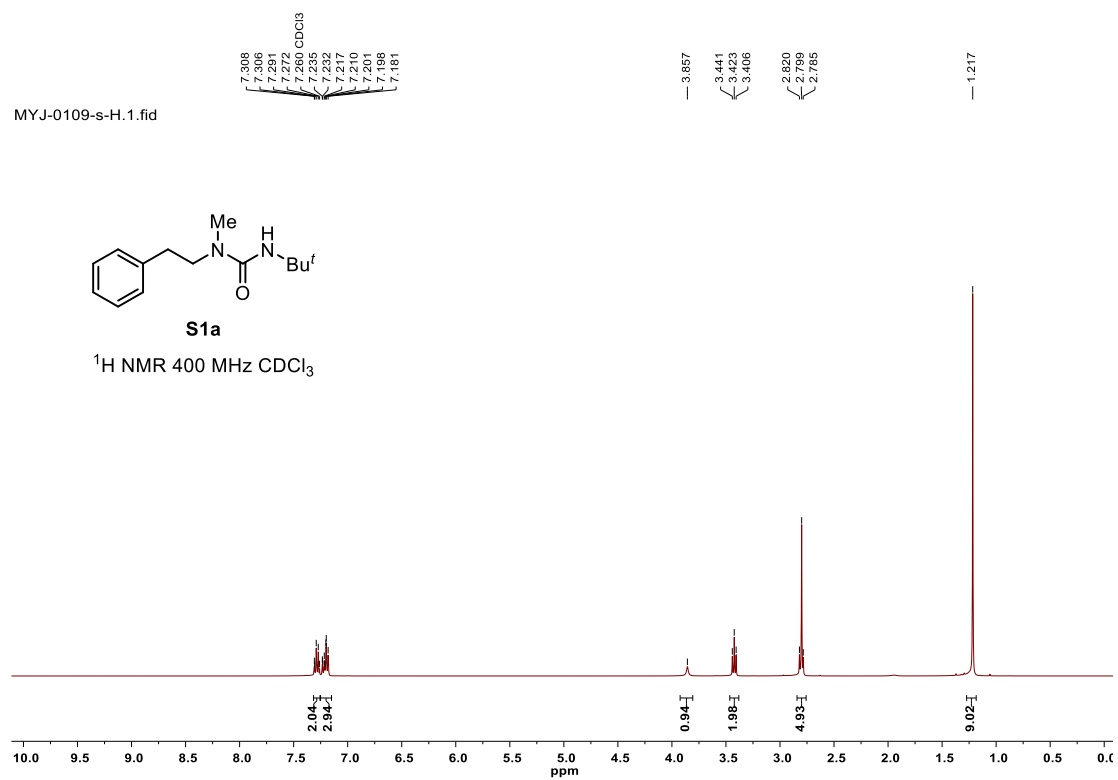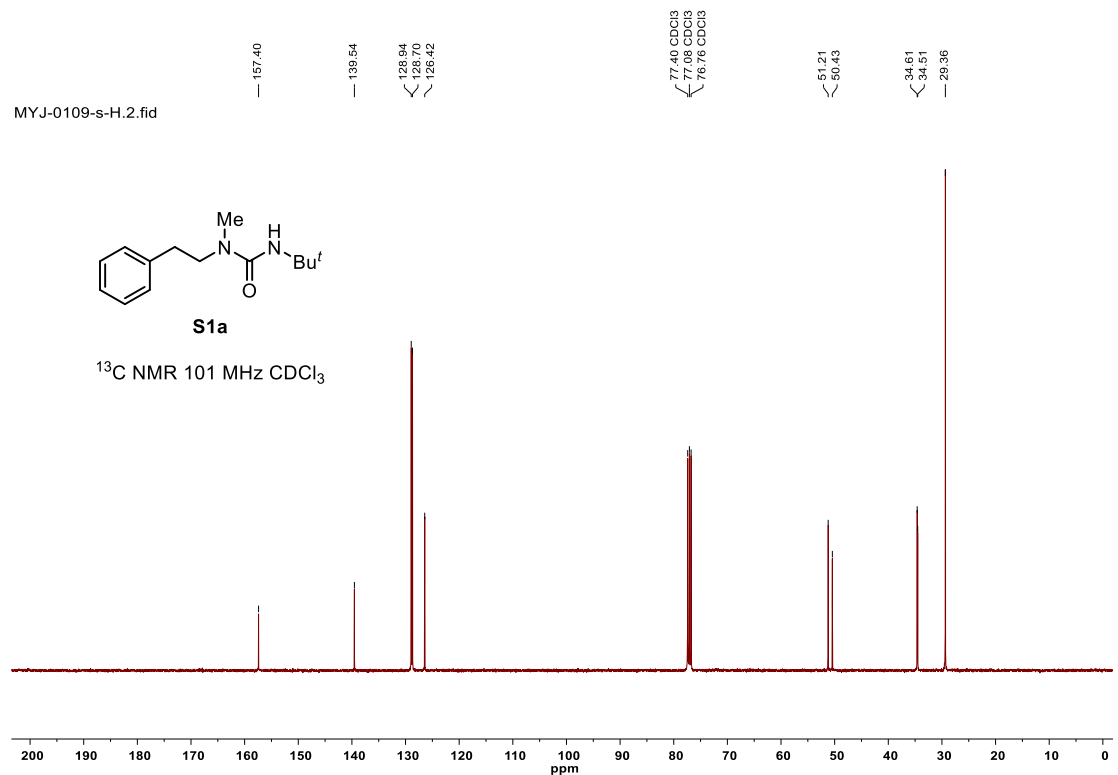

MYJ-0110-s-p-Me.1.fid

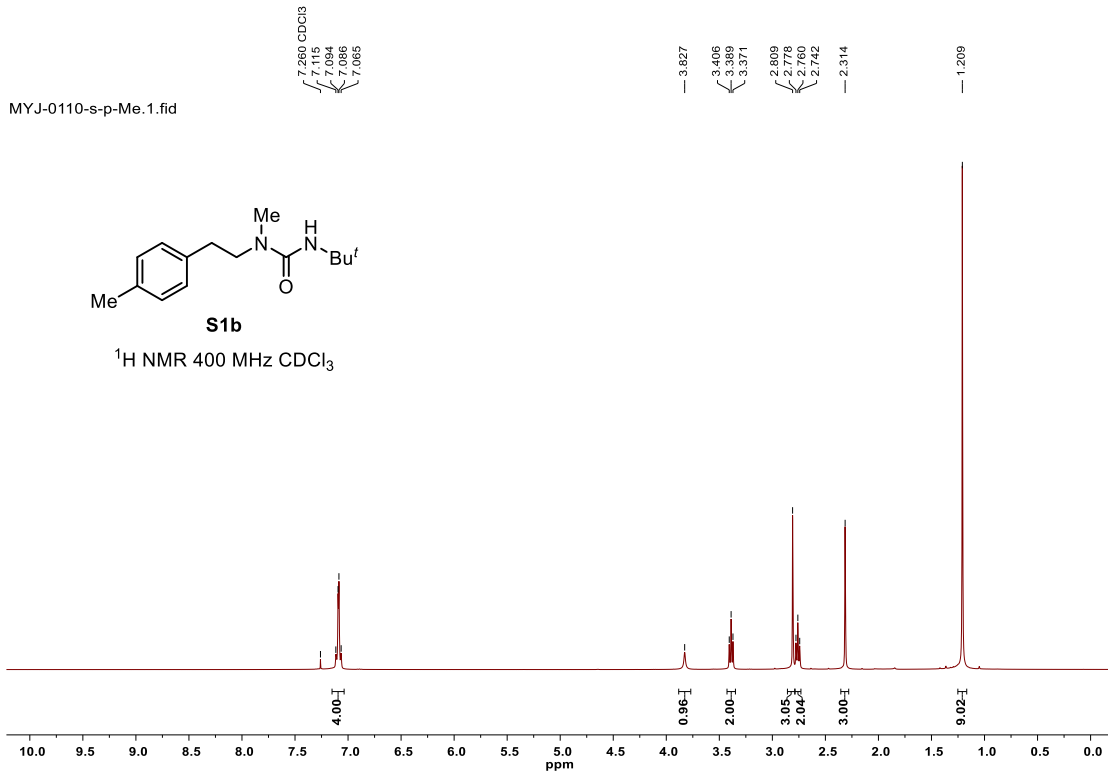

MYJ-0110-s-p-Me.2.fid

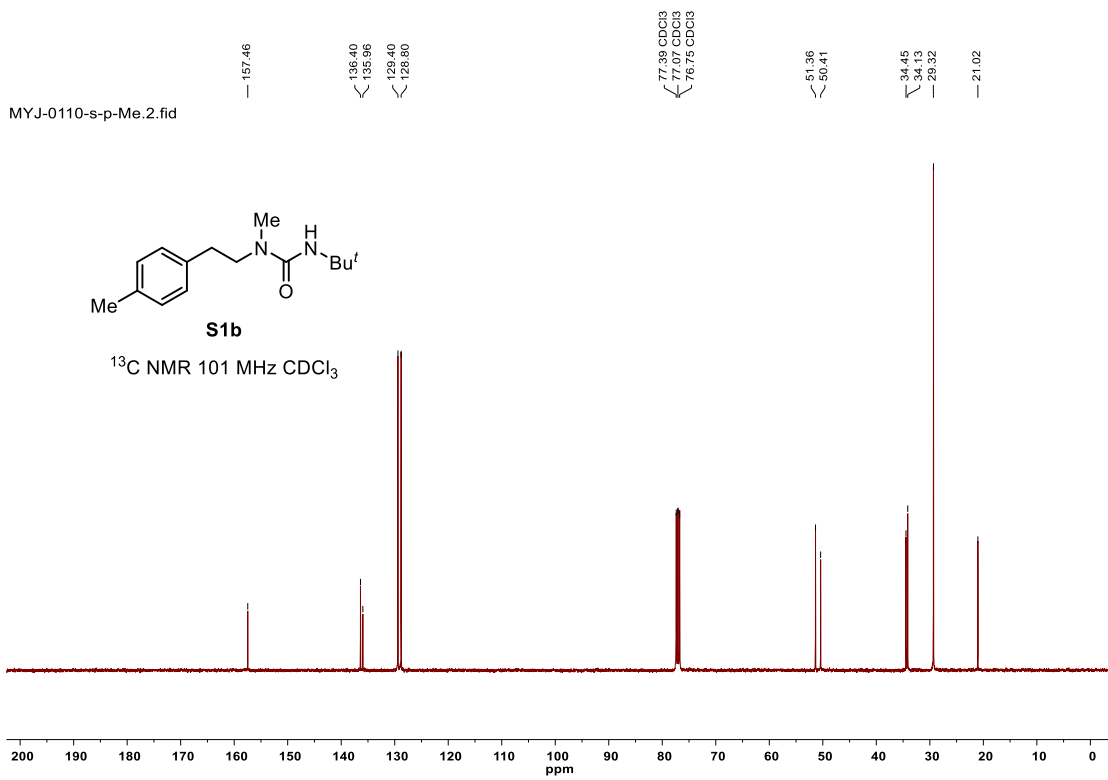



MYJ-0109-s-p-OMe.1.fid

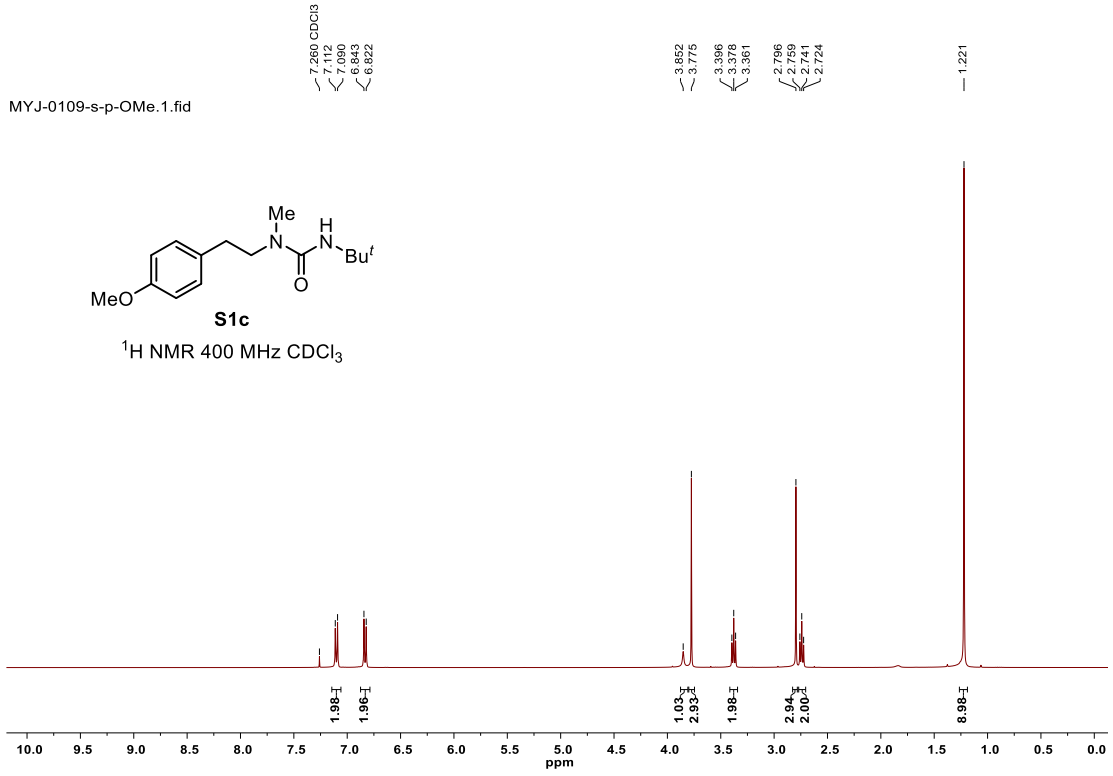

MYJ-0109-s-p-OMe.2.fid

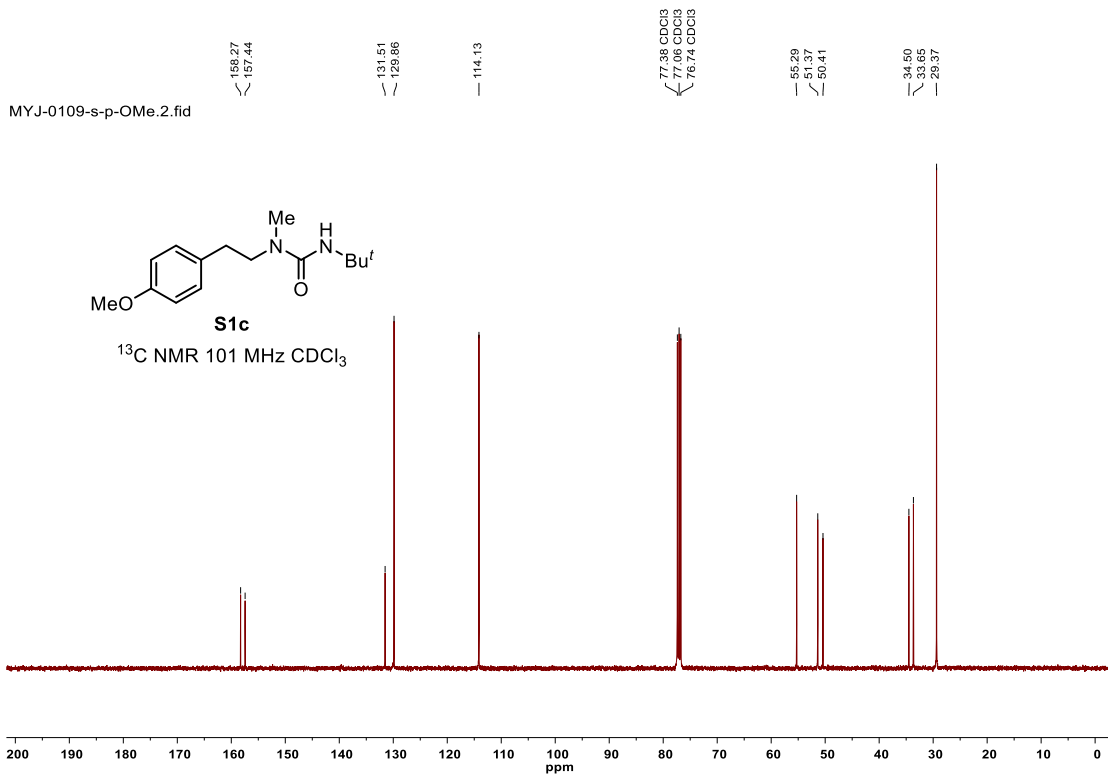

MYJ-0109-s-p-Ph.1.fid

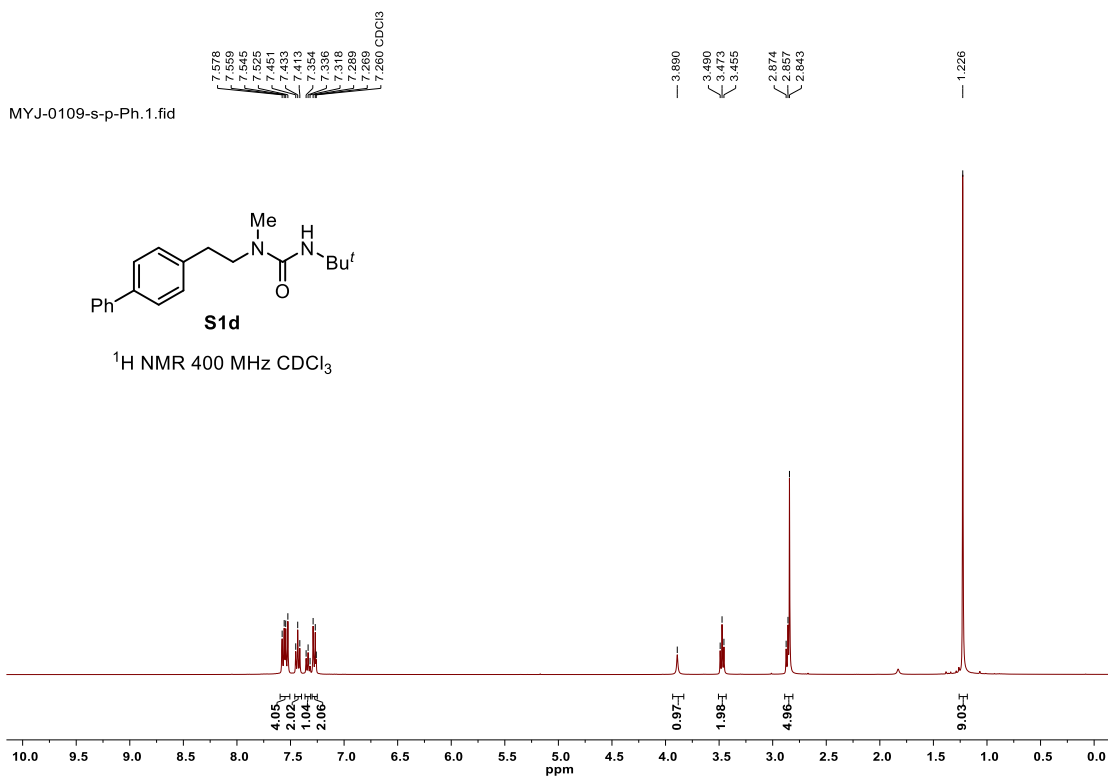

MYJ-0109-s-p-Ph.2.fid

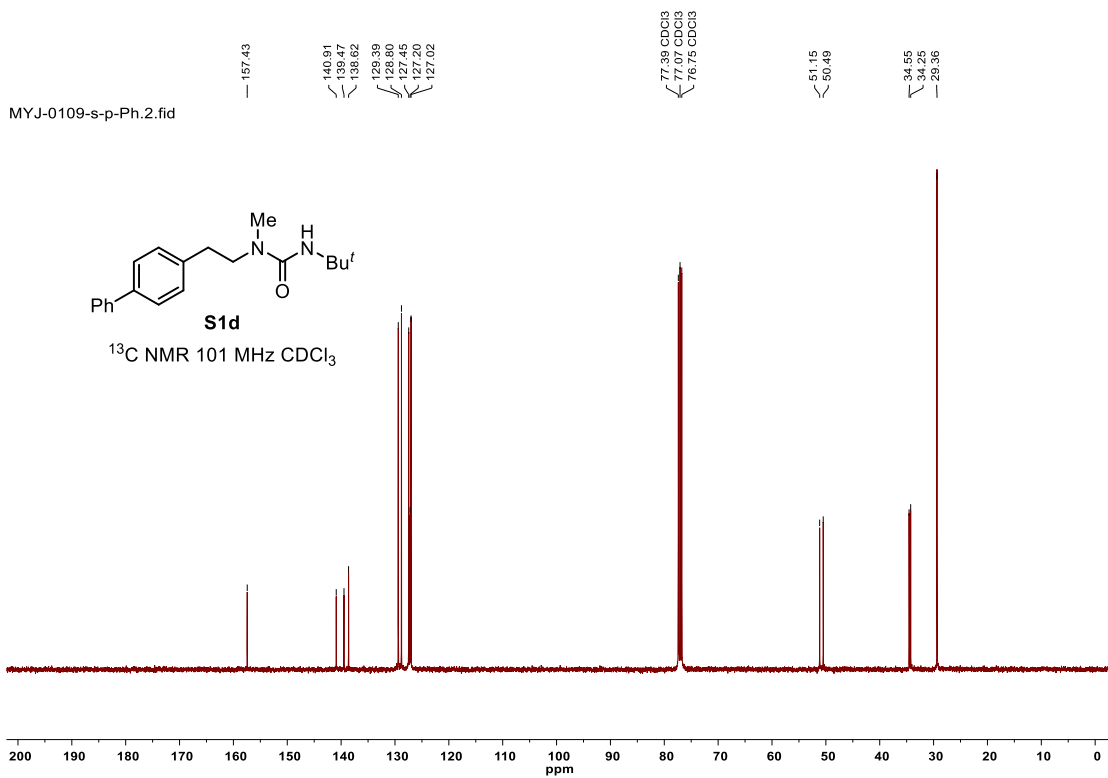

MYJ-0109-s-p-F.1.fid

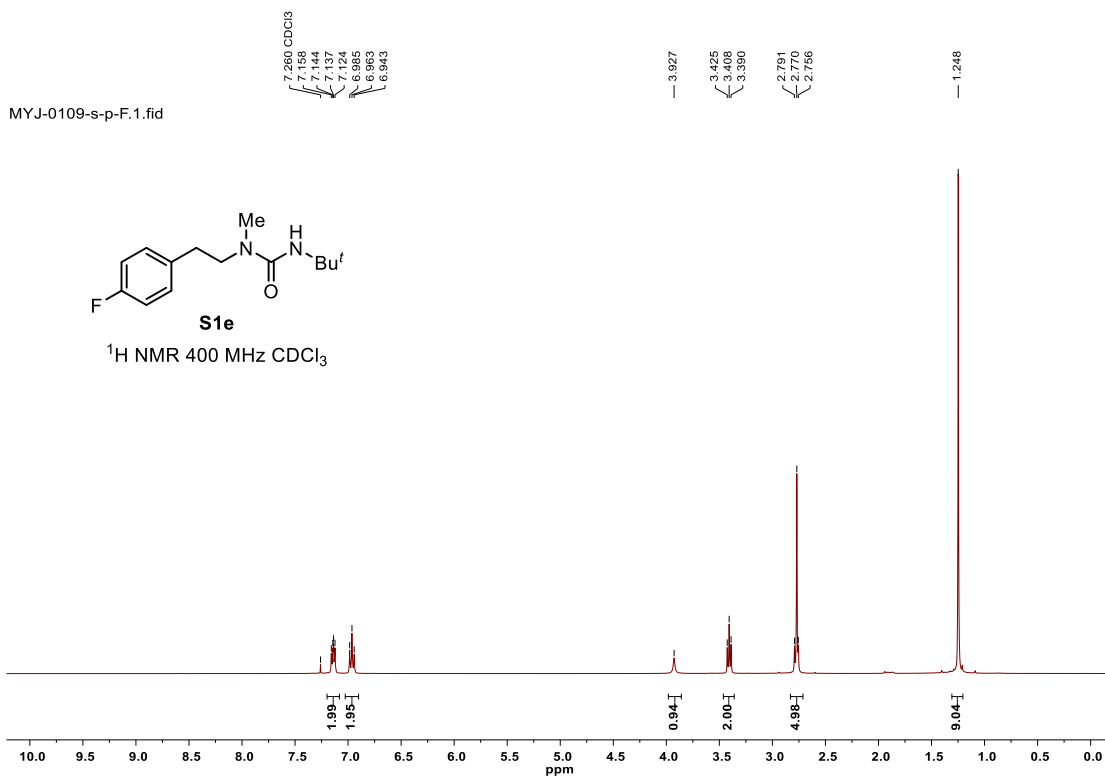

MYJ-0109-s-p-F.2.fid

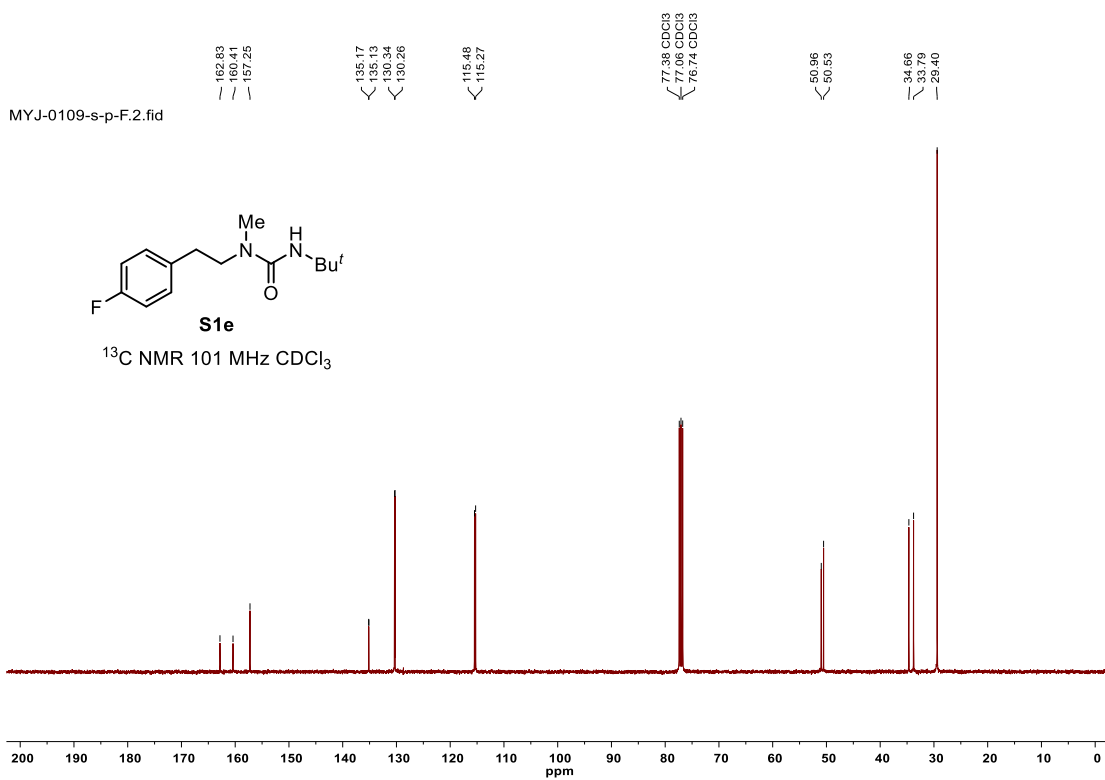

MYJ-0109-s-p-Cl.1.fid

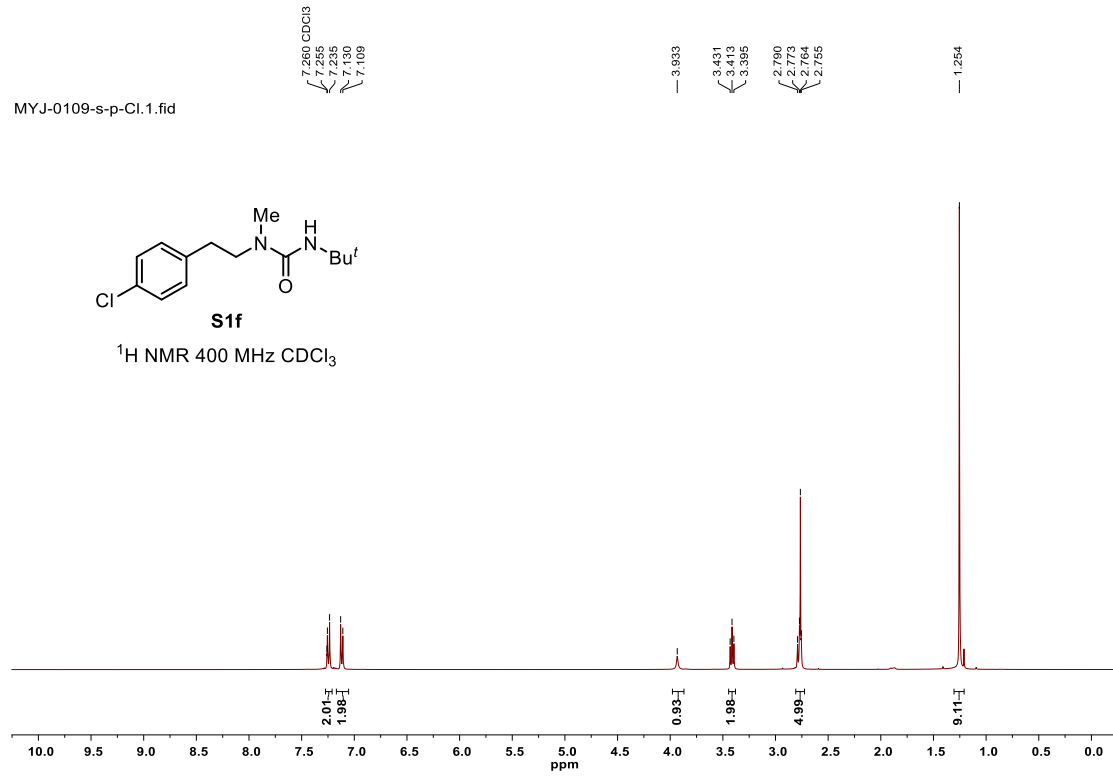

MYJ-0109-s-p-Cl.2.fid

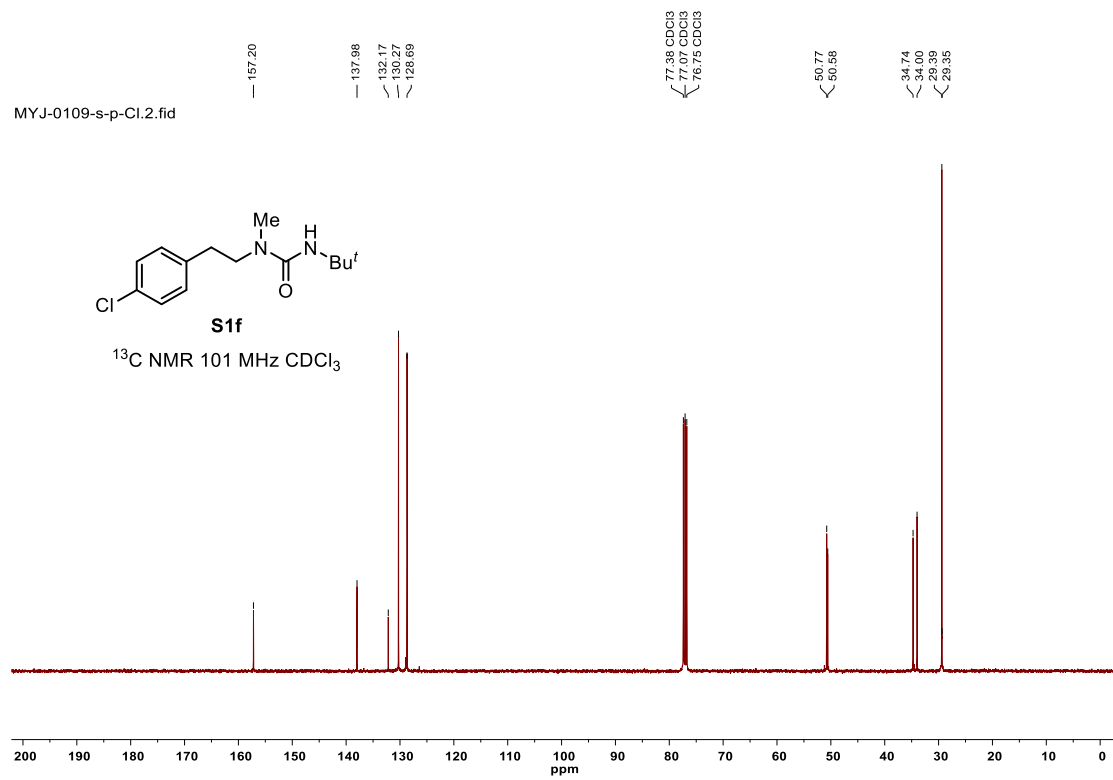

30701372\_20240308095744A059.30701371.fid  
YMJ-s-p-Br CDCl3 0308

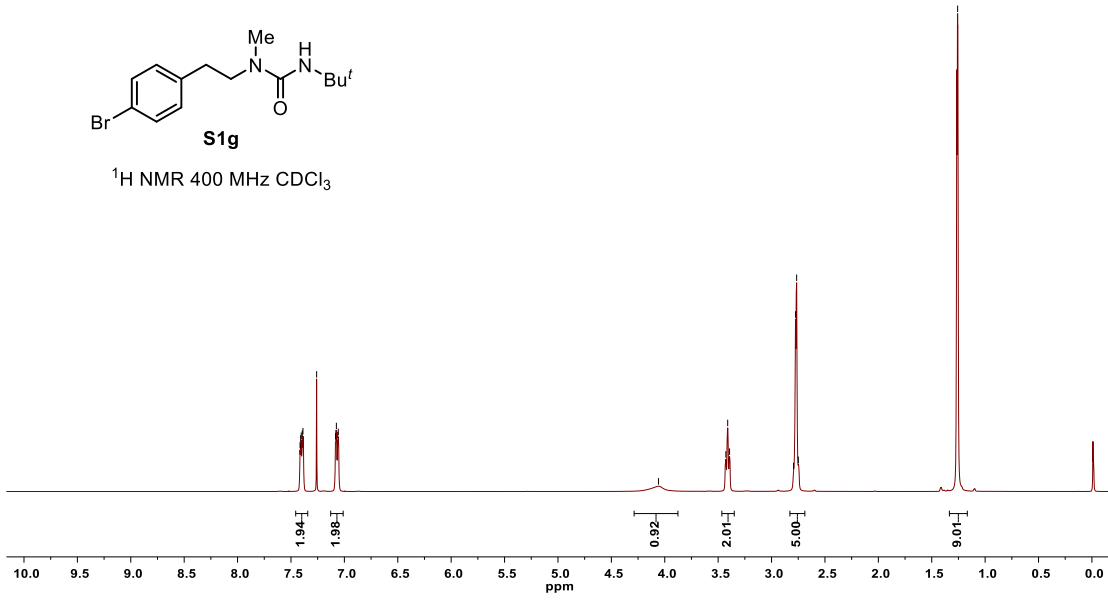

30701372\_20240308095744A059.30701372.fid  
YMJ-s-p-Br CDCl3 0308

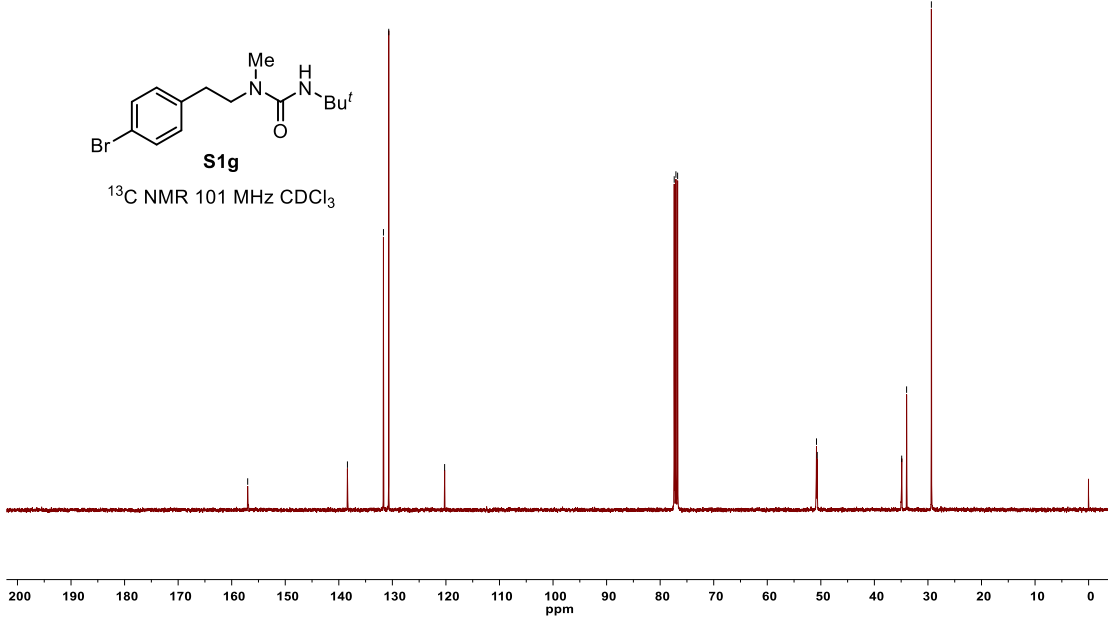

MYJ-0109-s-p-CF3.1.fid

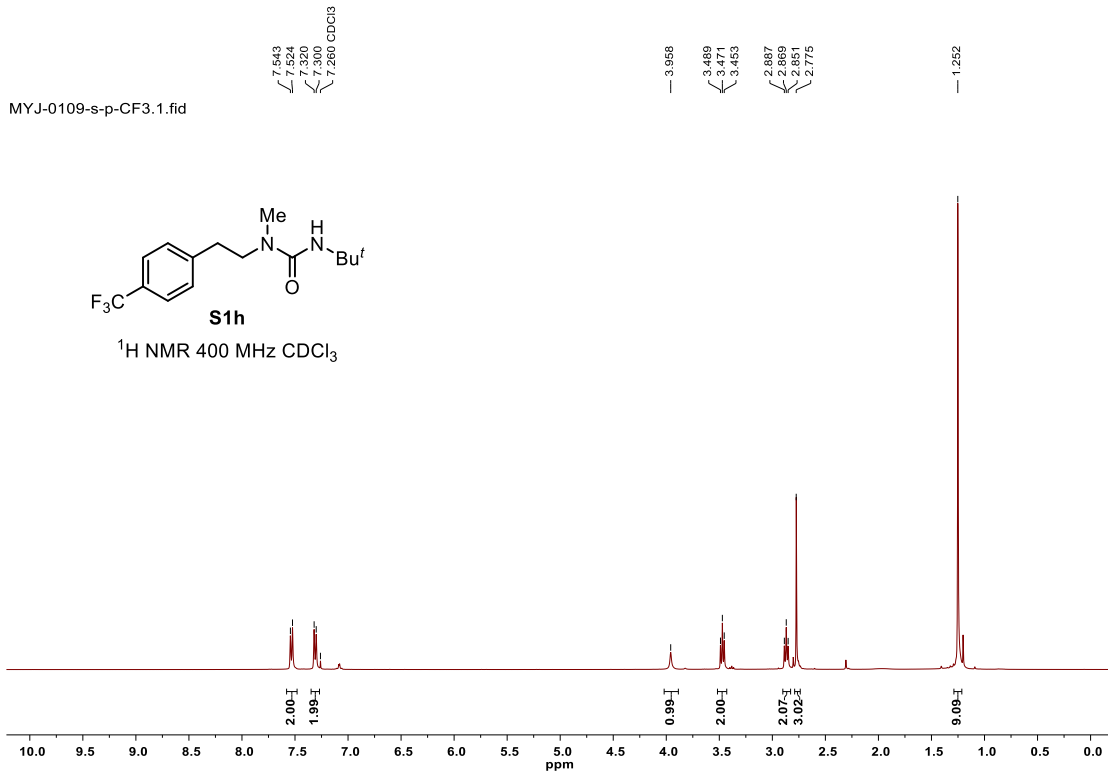

MYJ-0109-s-p-CF3.2.fid

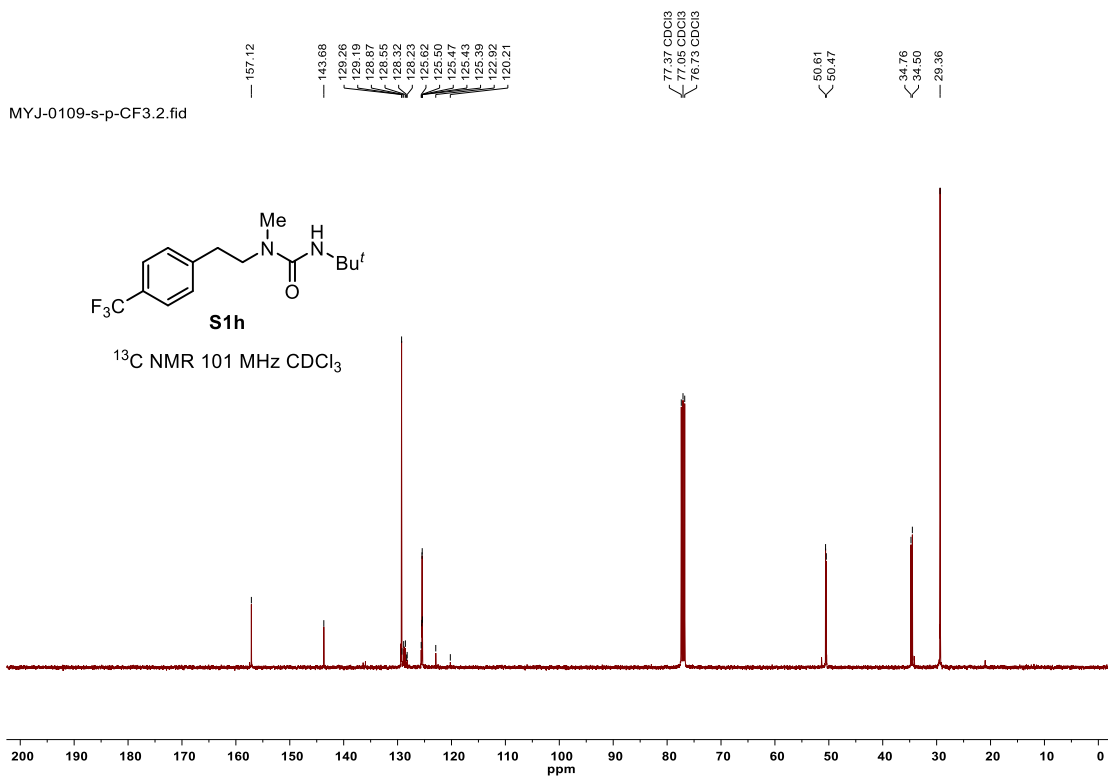

MYJ-0109-s-p-OCF3.1.fid

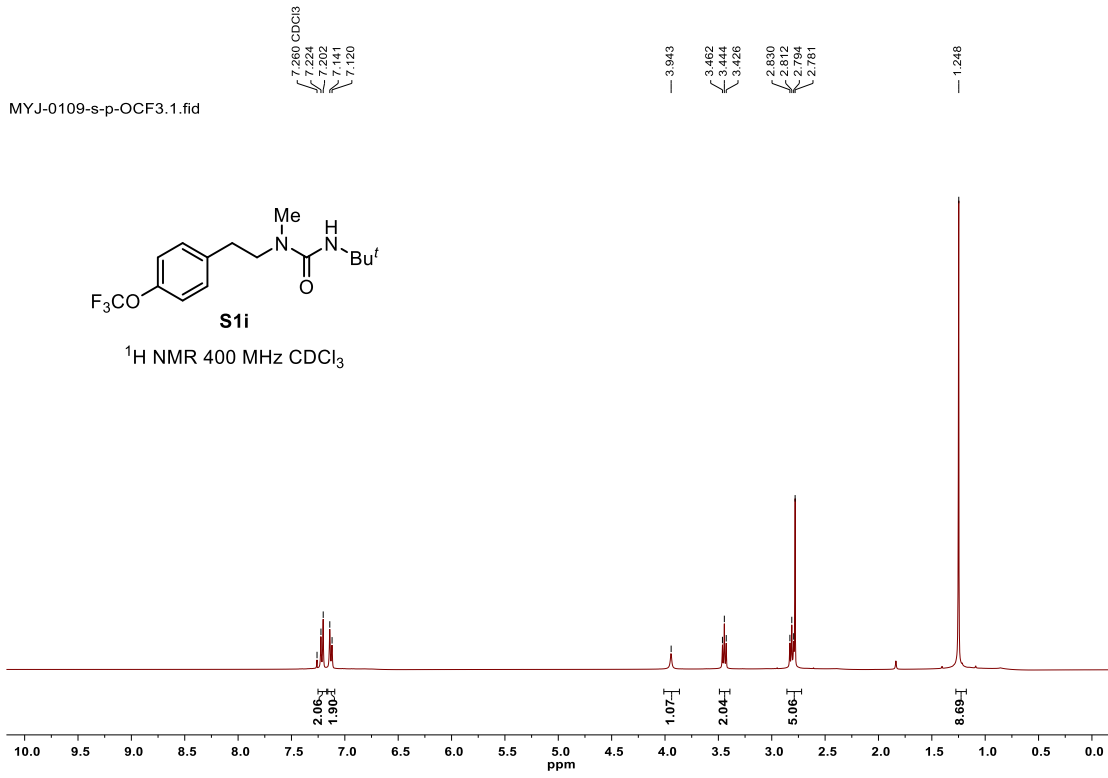

MYJ-0109-s-p-OCF3.2.fid

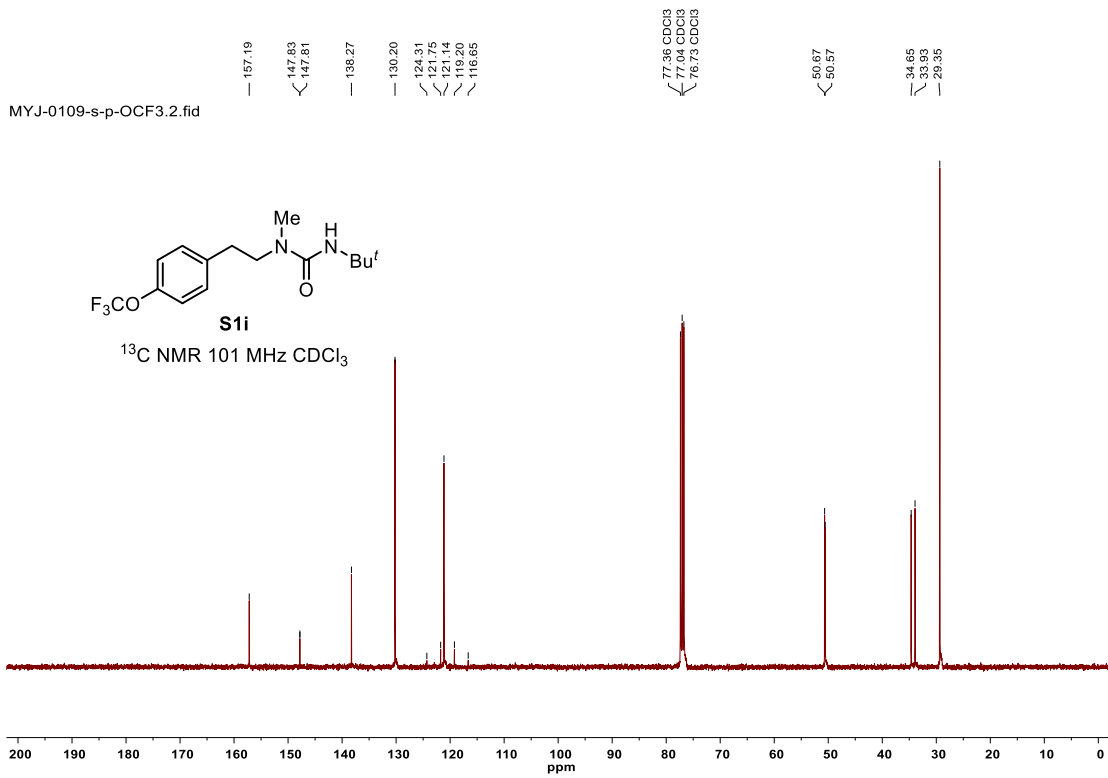

22801439\_20240301091924A258.228014312.fid  
s-m-F CDCl<sub>3</sub> 0229

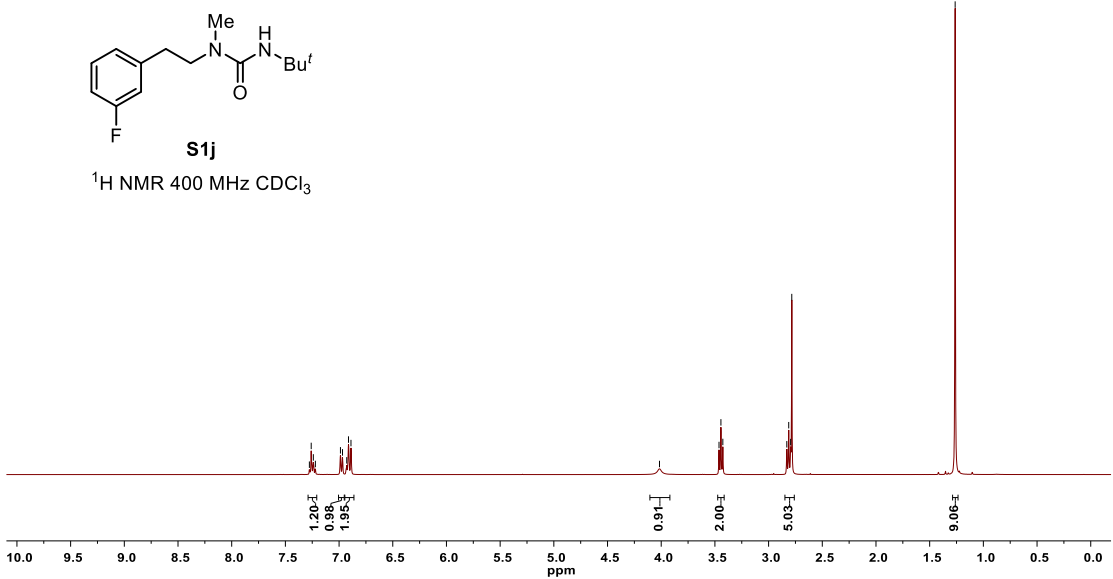

22801439\_20240301091924A258.228014311.fid  
s-m-F CDCl<sub>3</sub> 0229

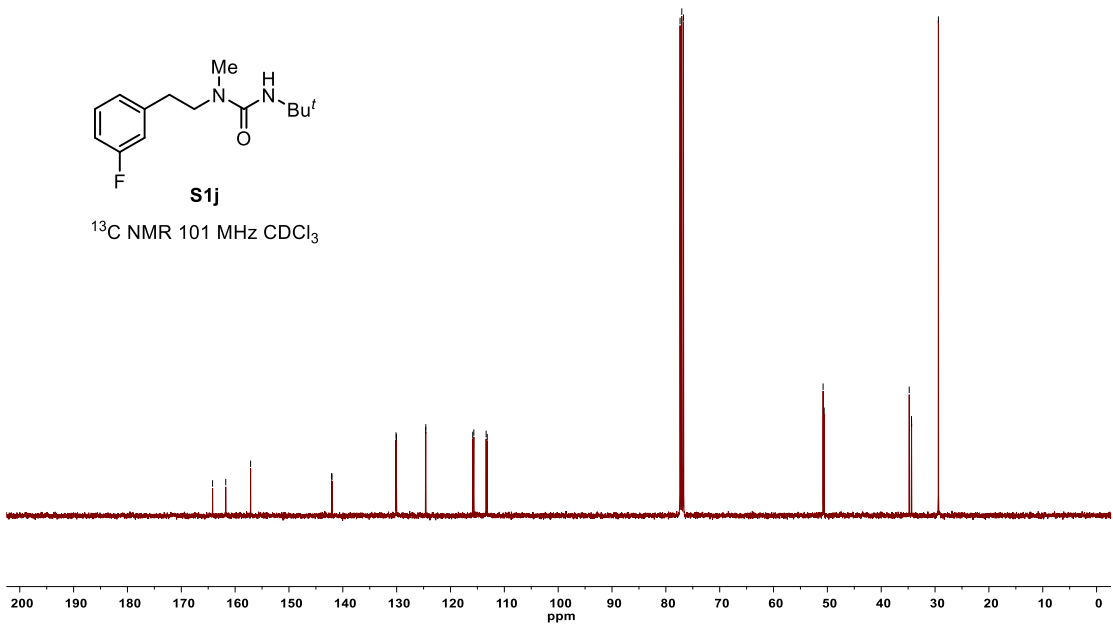



MYJ-0109-s-m-Cl.1.fid

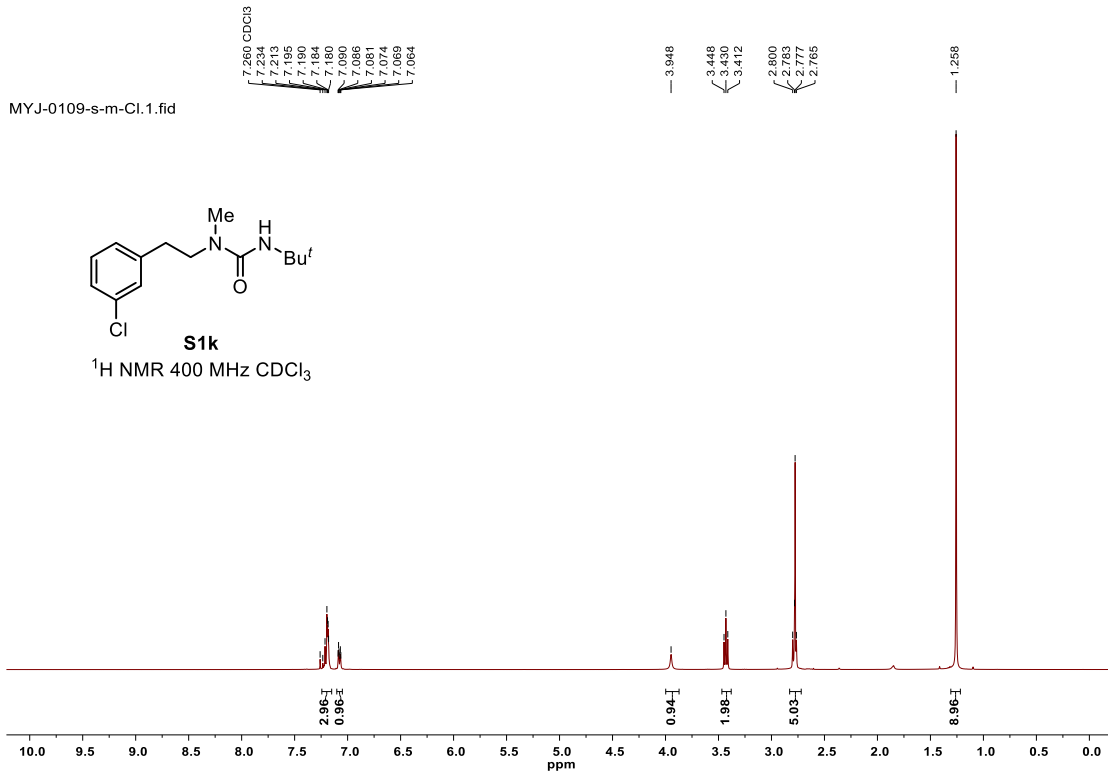

MYJ-0109-s-m-Cl.2.fid

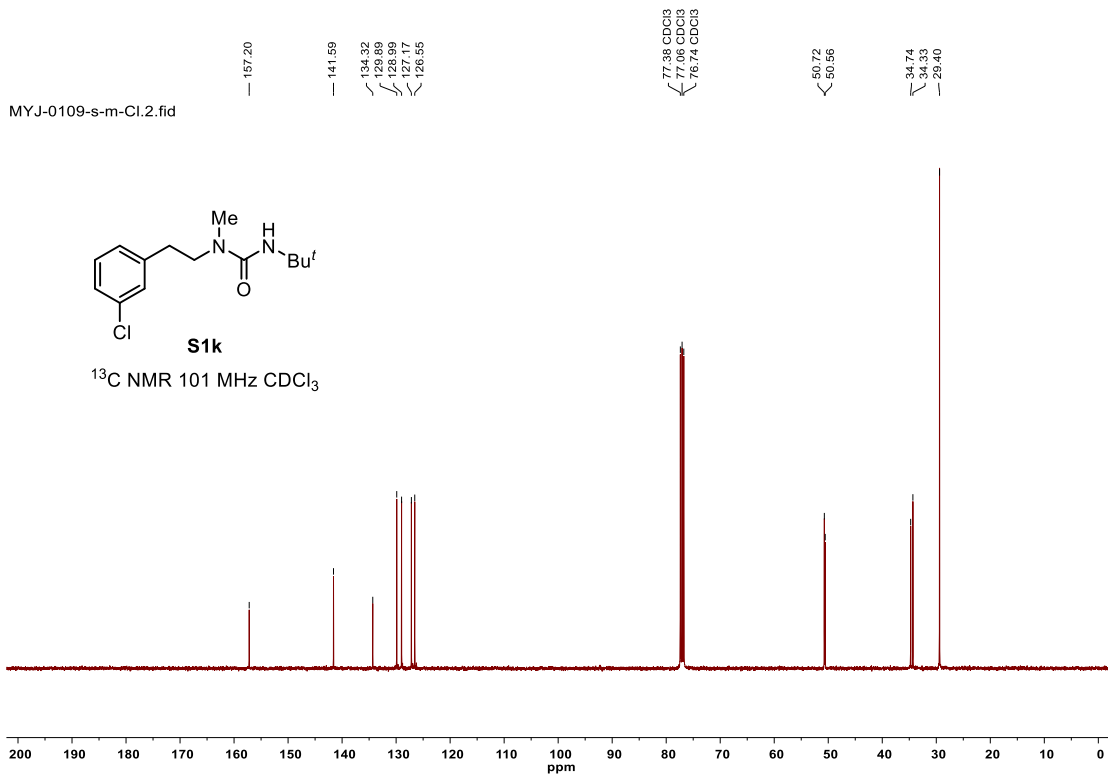

MYJ-0109-s-m-CF3.1.fid

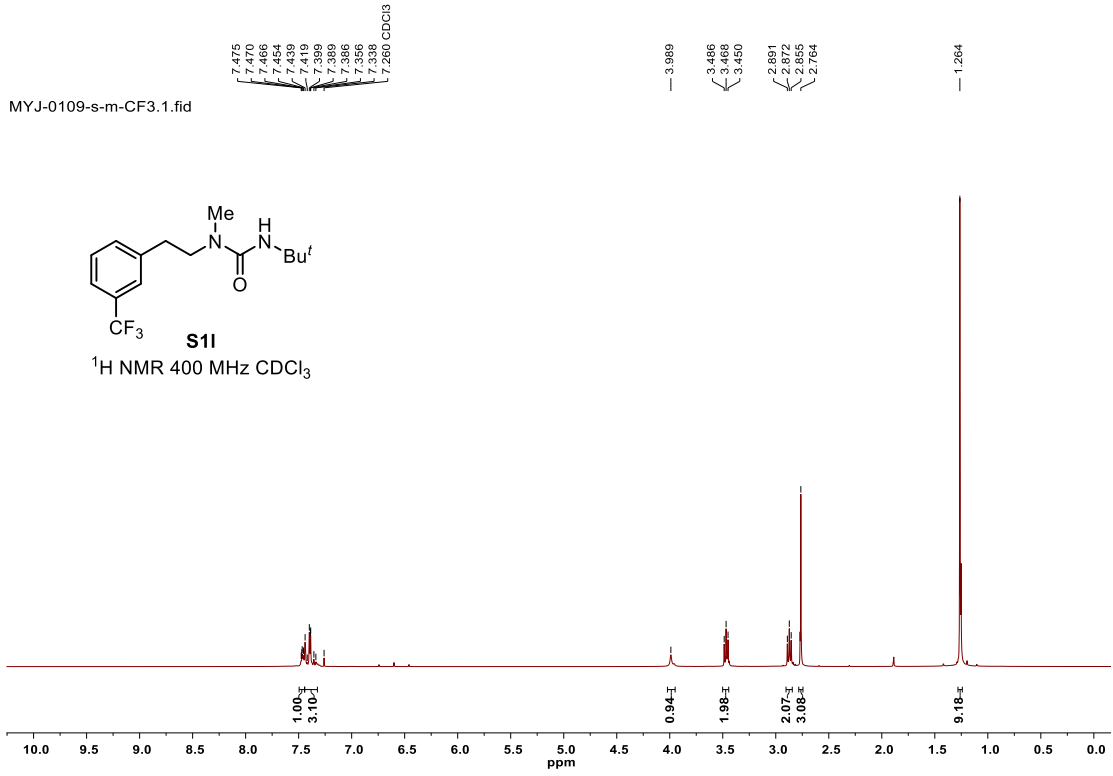

MYJ-0109-s-m-CF3.2.fid

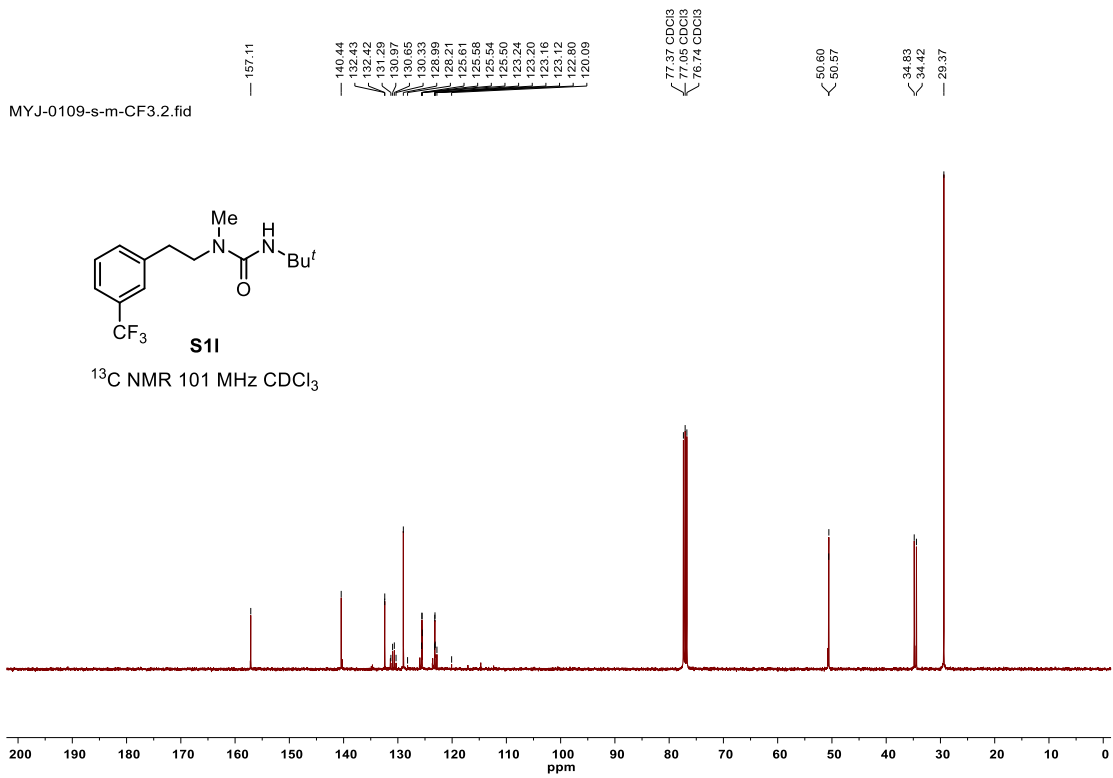

MYJ-0109-s-o-F.1.fid

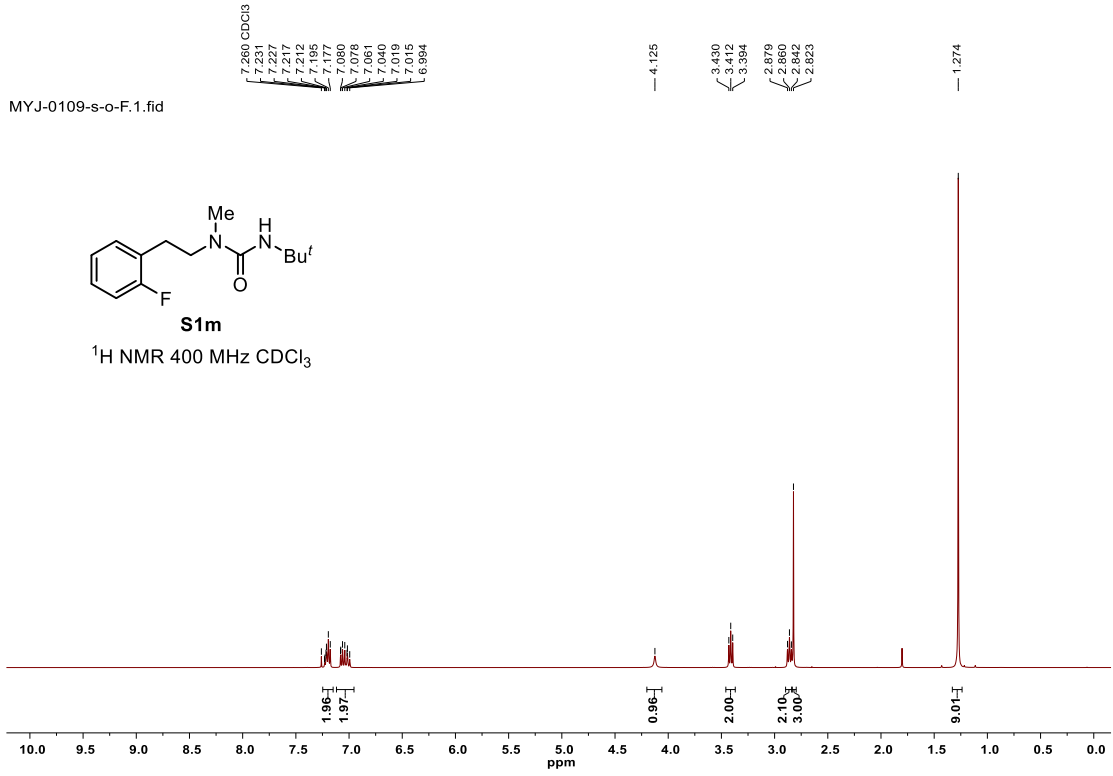

MYJ-0109-s-o-F.2.fid

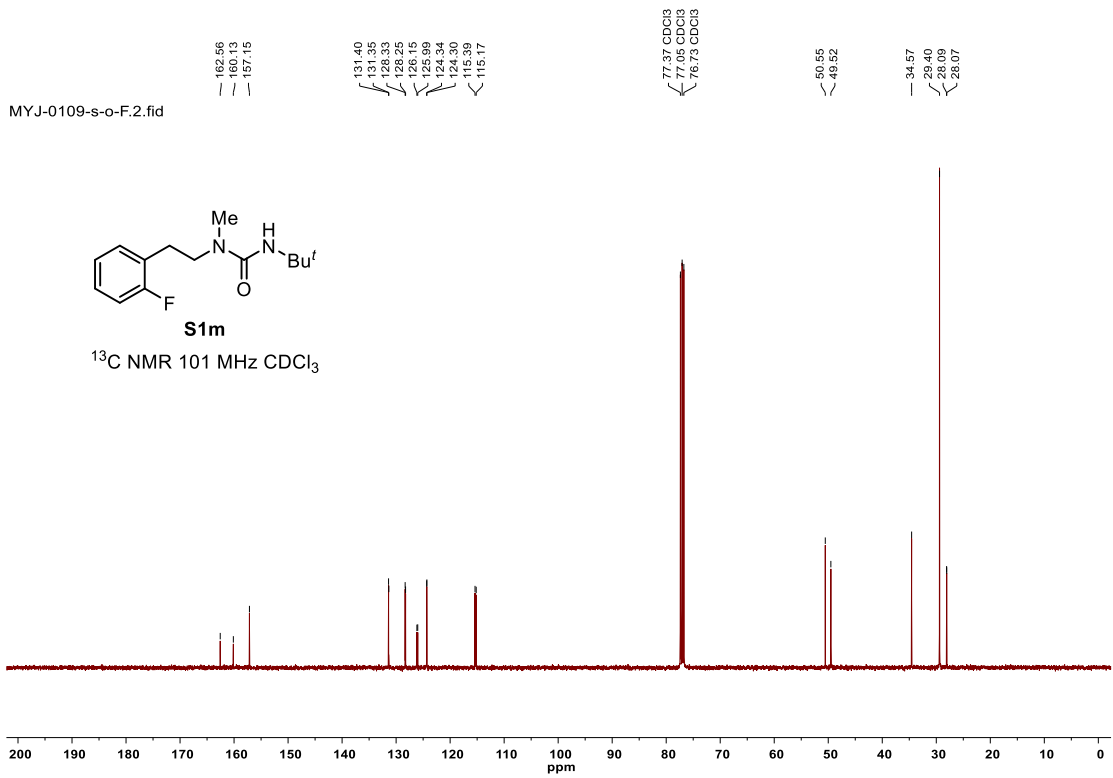

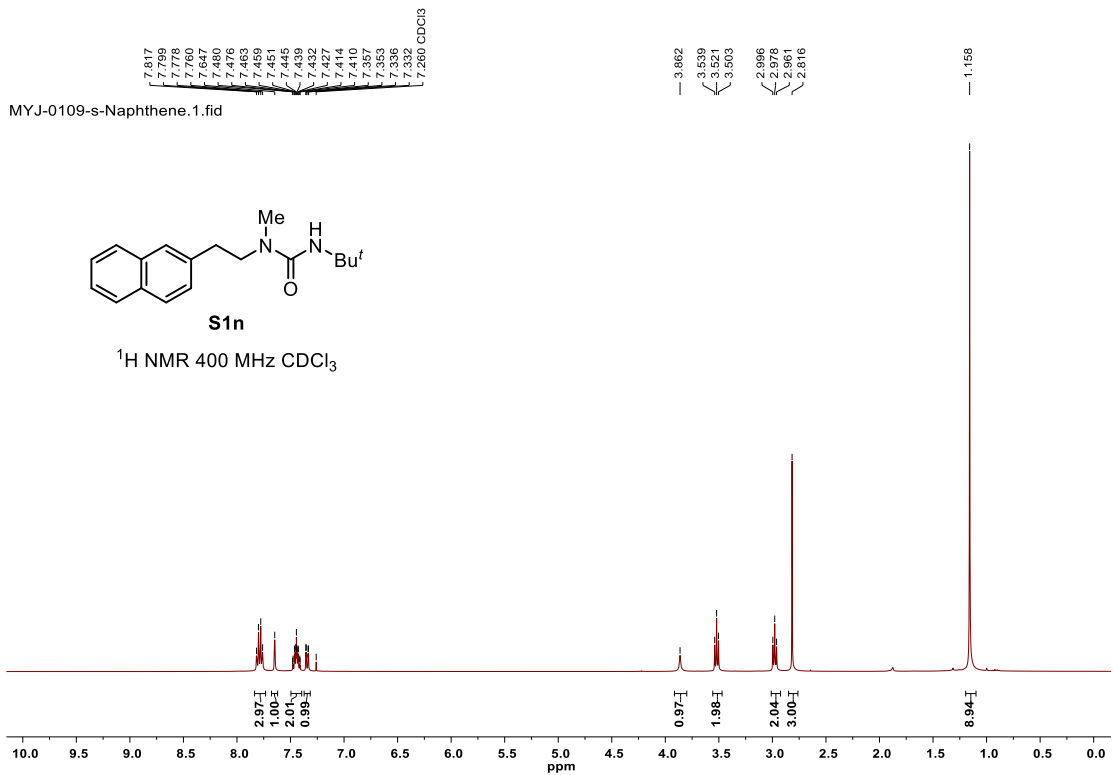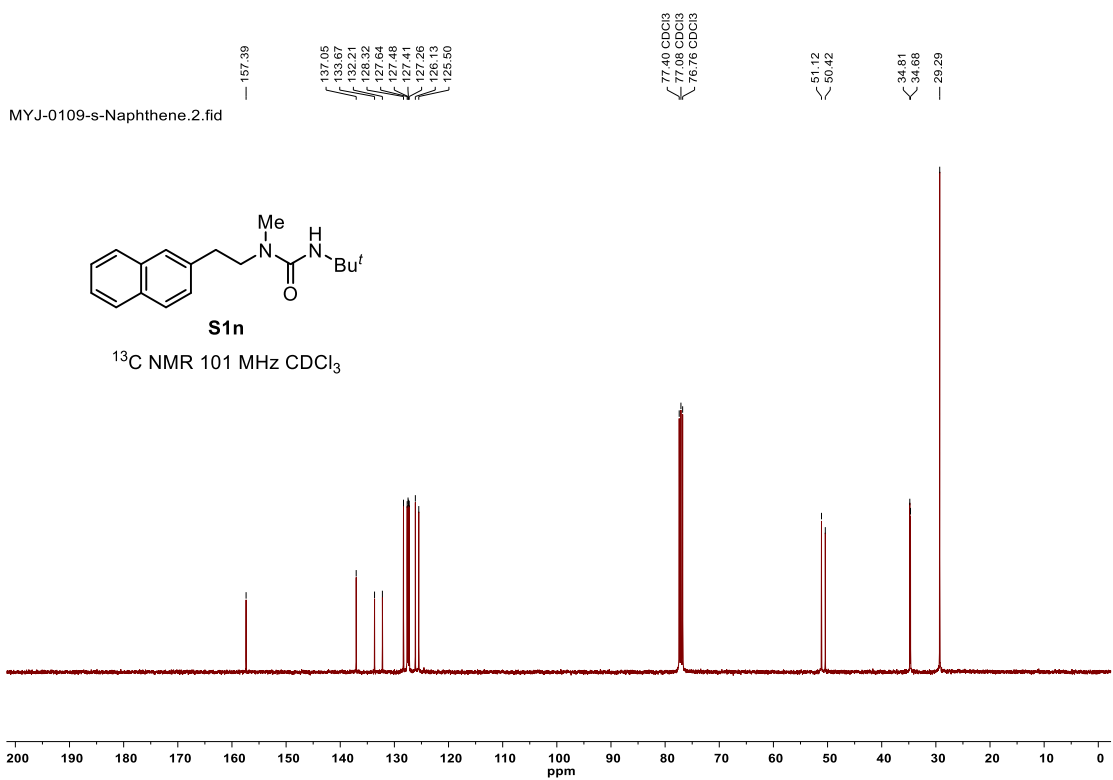

MYJ-0109-s-cyclodiO.1.fid

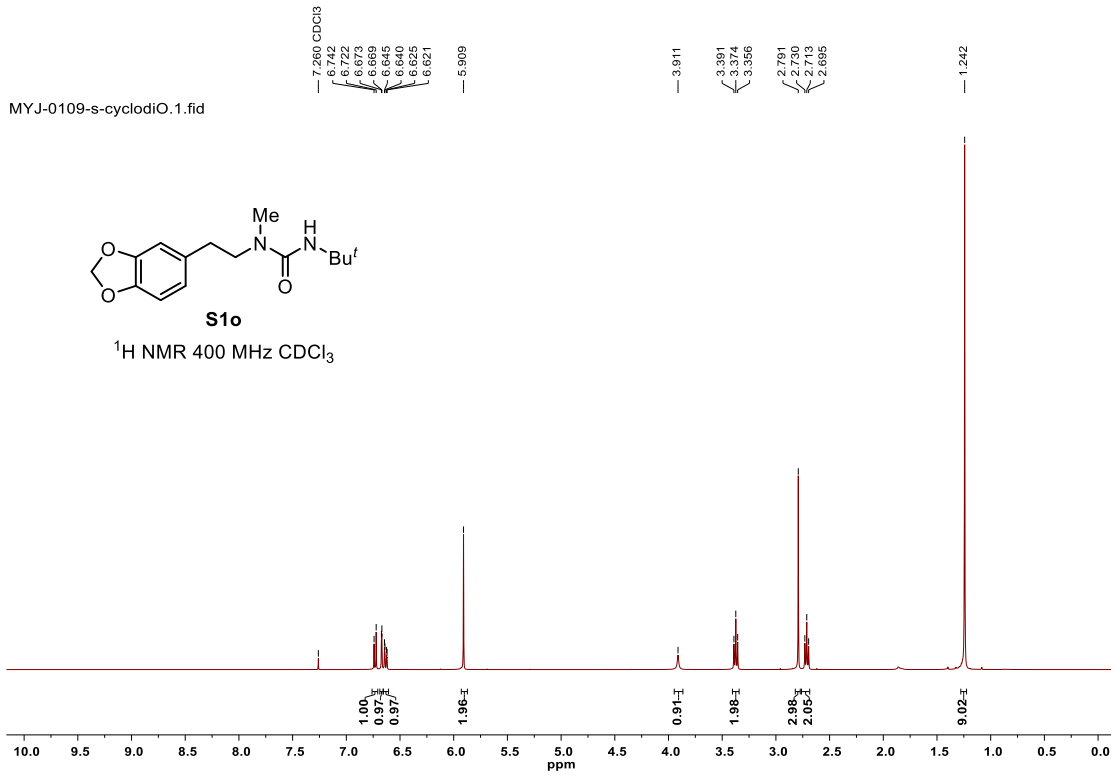

MYJ-0109-s-cyclodiO.2.fid

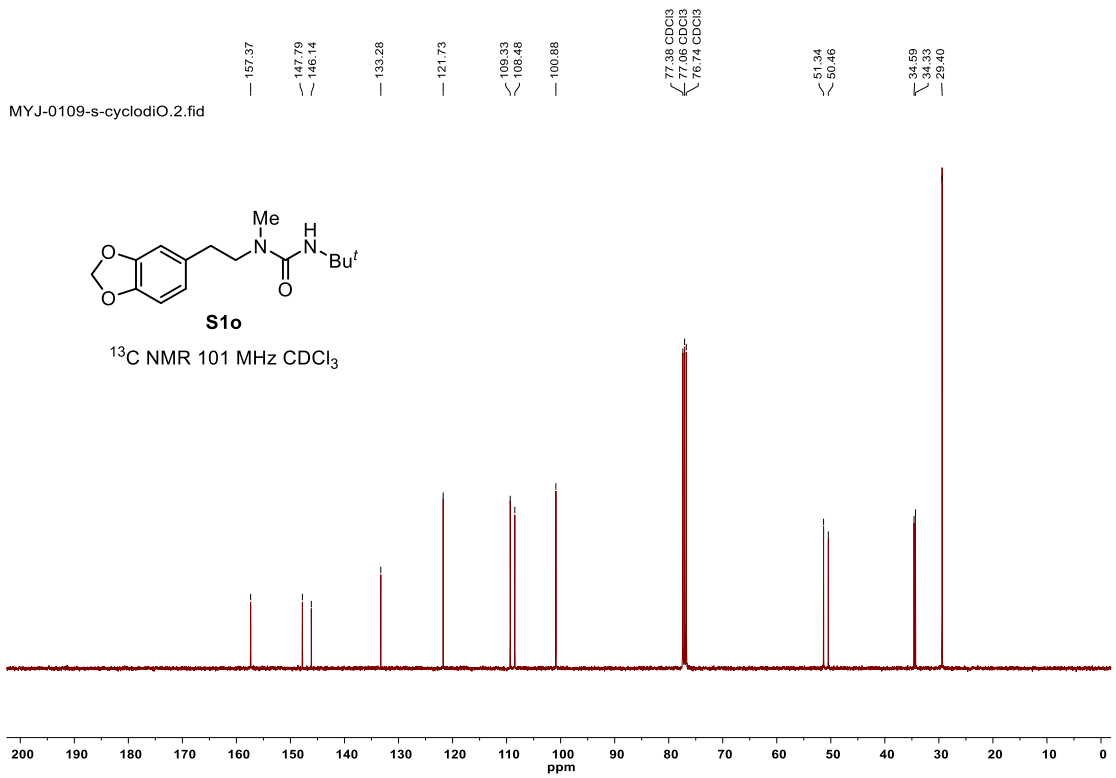

MYJ-0109-s-furan.1.fid

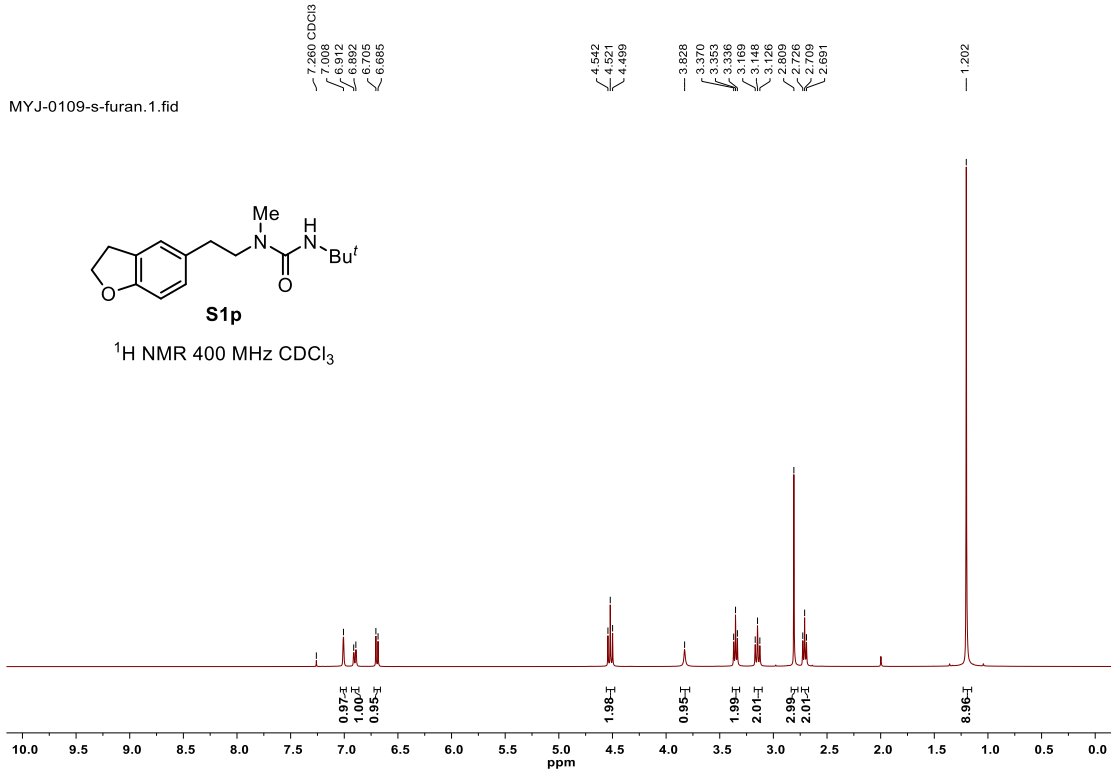

MYJ-0109-s-furan.2.fid

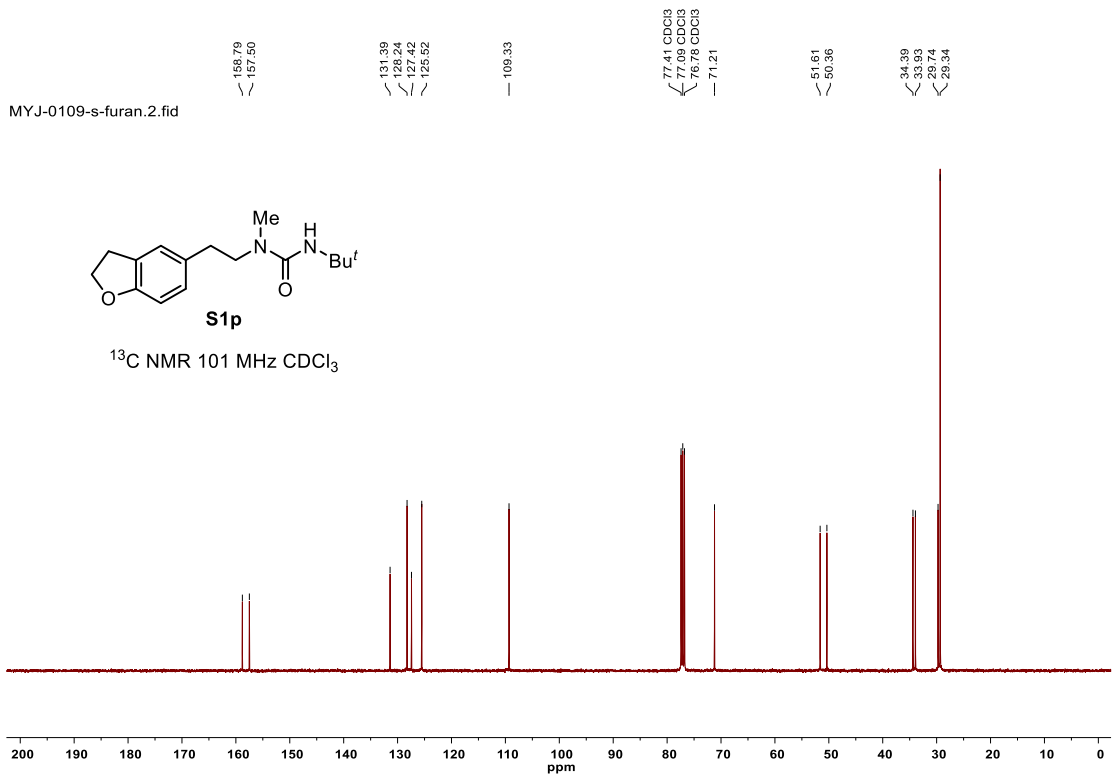

30702252\_20240308165214A043.30702251.fid  
 MYJ-s-diOMe CDCl3 0308

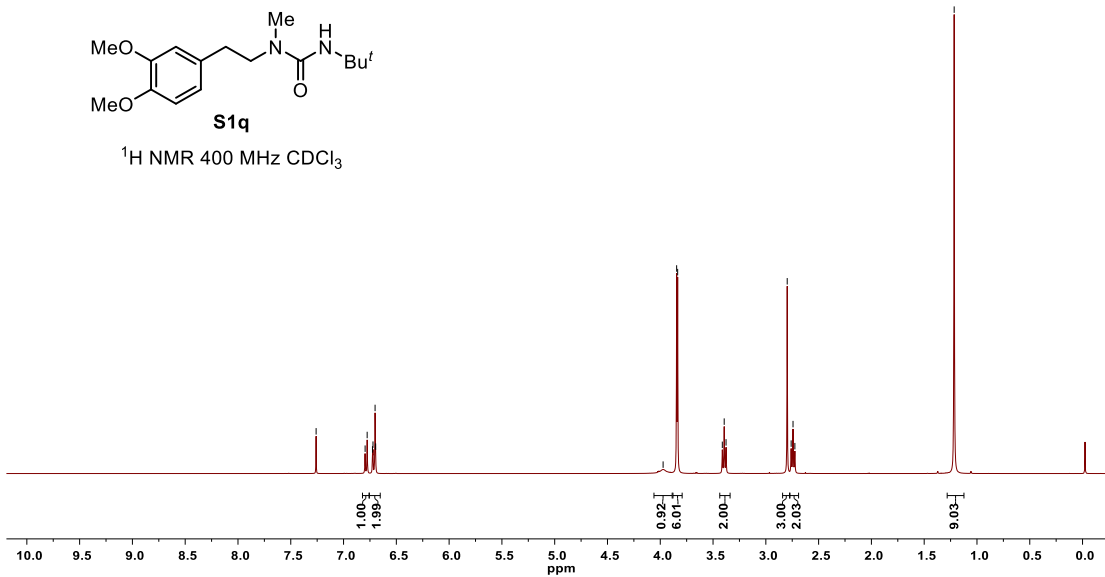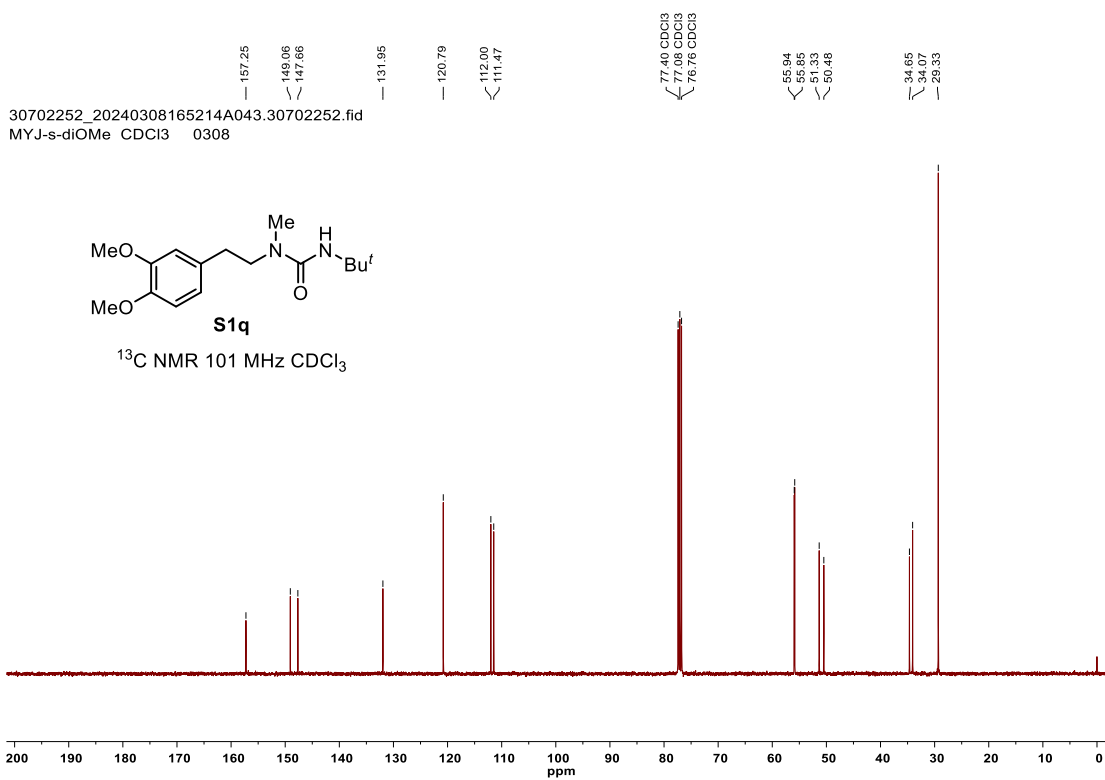

30101381\_20240306094219A572.30101382.fid  
s-0301-Phyne CDCl<sub>3</sub> 0305

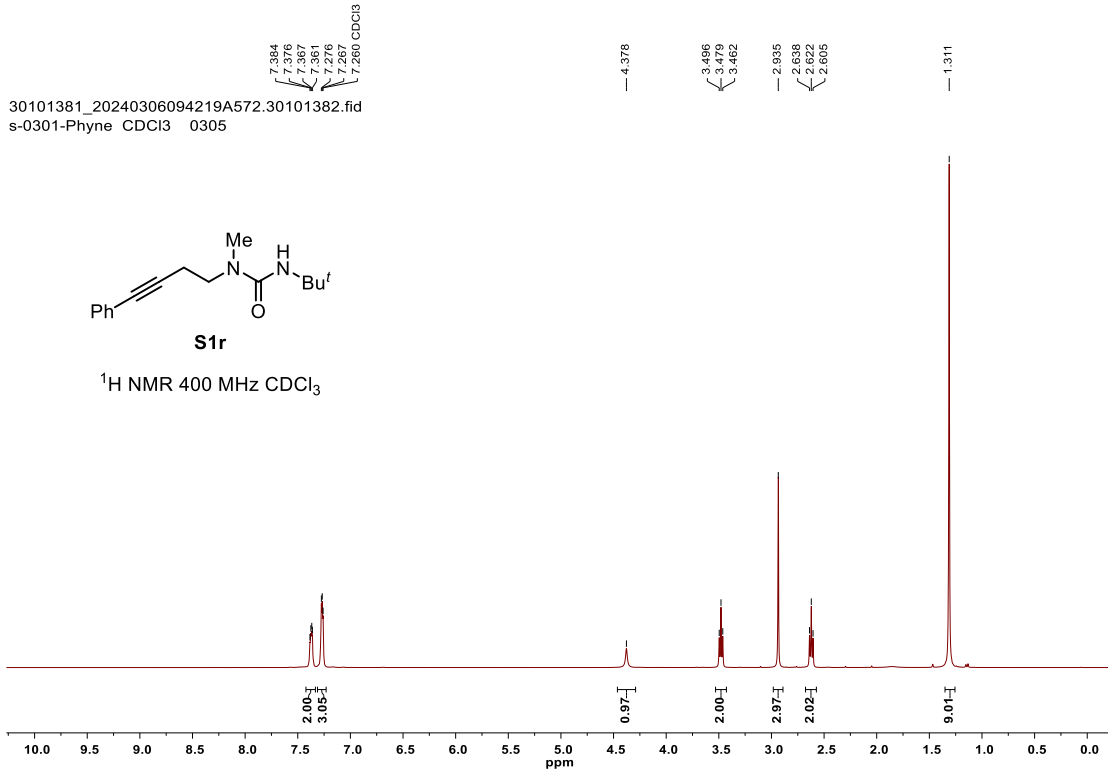

30101381\_20240306094219A572.30101381.fid  
s-0301-Phyne CDCl<sub>3</sub> 0305

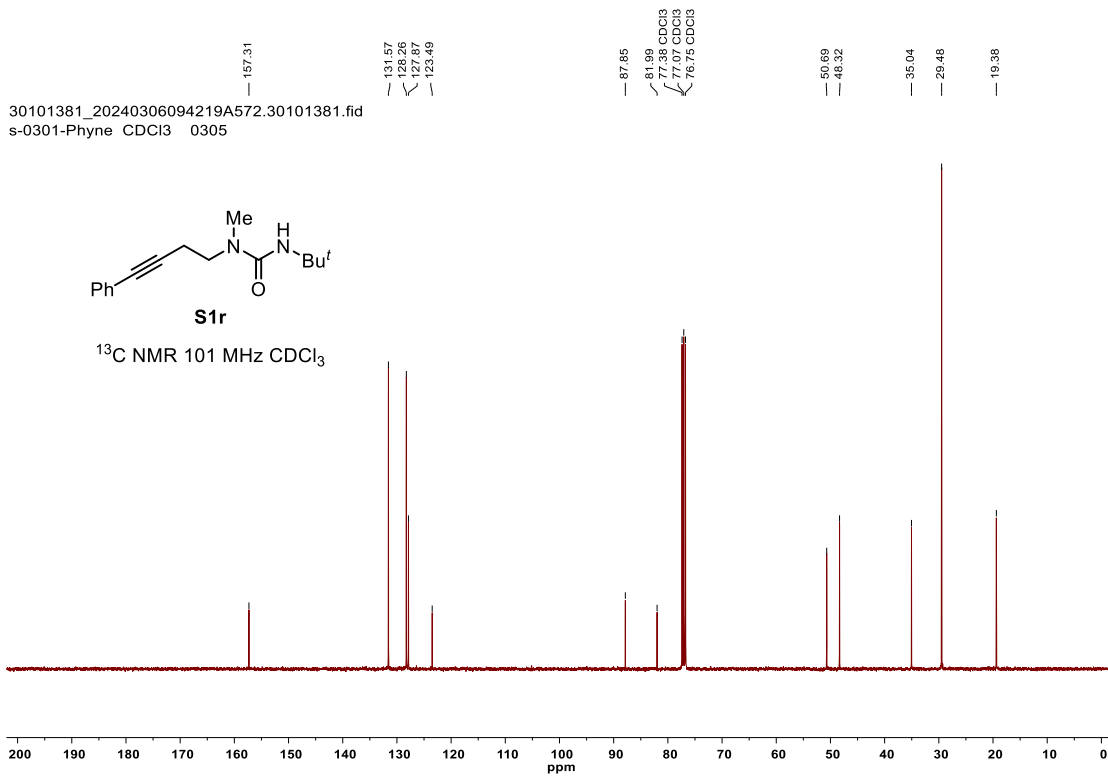



22801439\_20240301091924A258.22801438.fid  
s-1,1-diPh CDCl3 0229

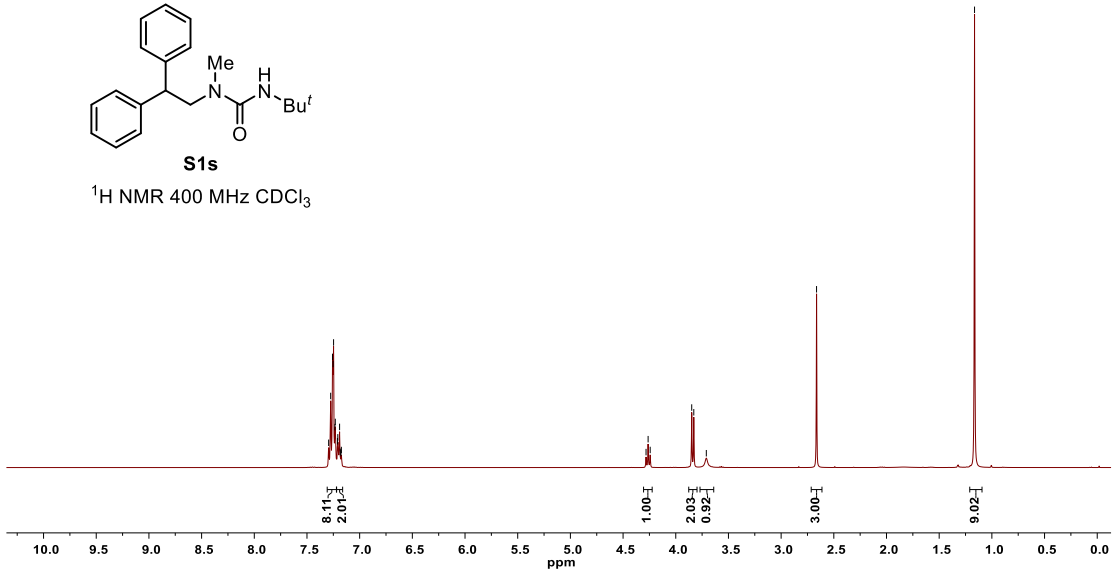

22801439\_20240301091924A258.22801437.fid  
s-1,1-diPh CDCl3 0229

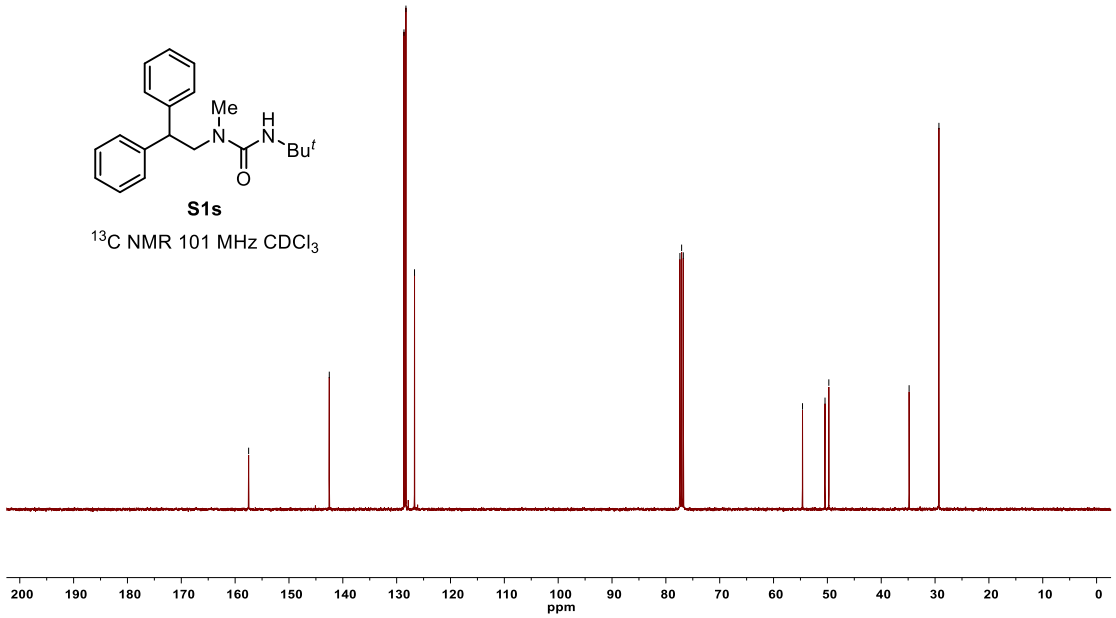

22801439\_20240301091924A258.228014310.fid  
s-Phpropyl CDCl<sub>3</sub> 0229

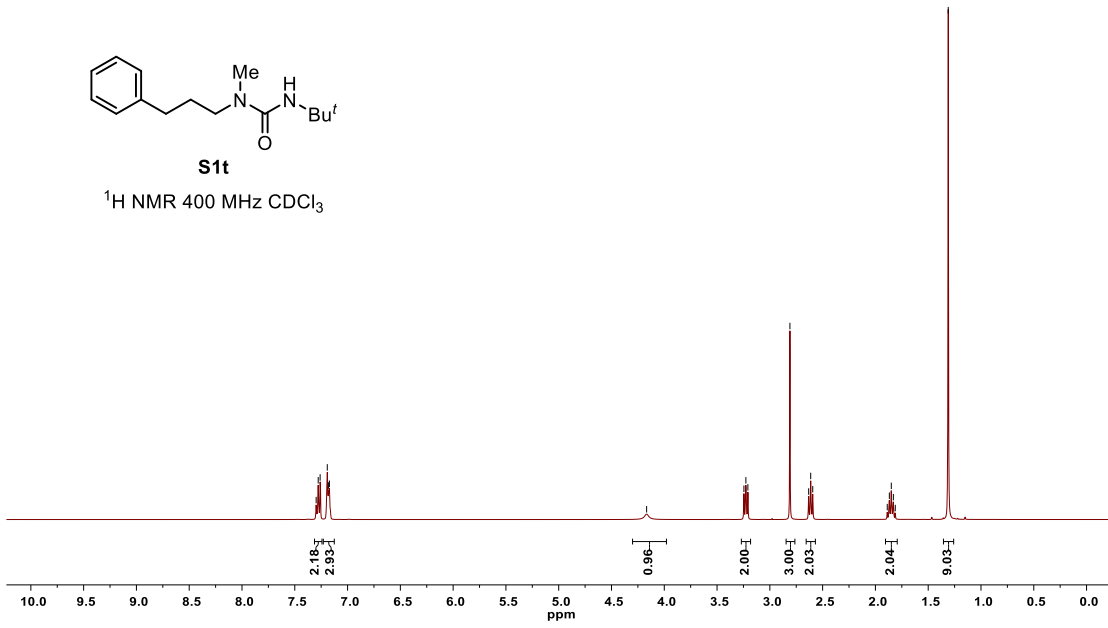

22801439\_20240301091924A258.22801439.fid  
s-Phpropyl CDCl<sub>3</sub> 0229

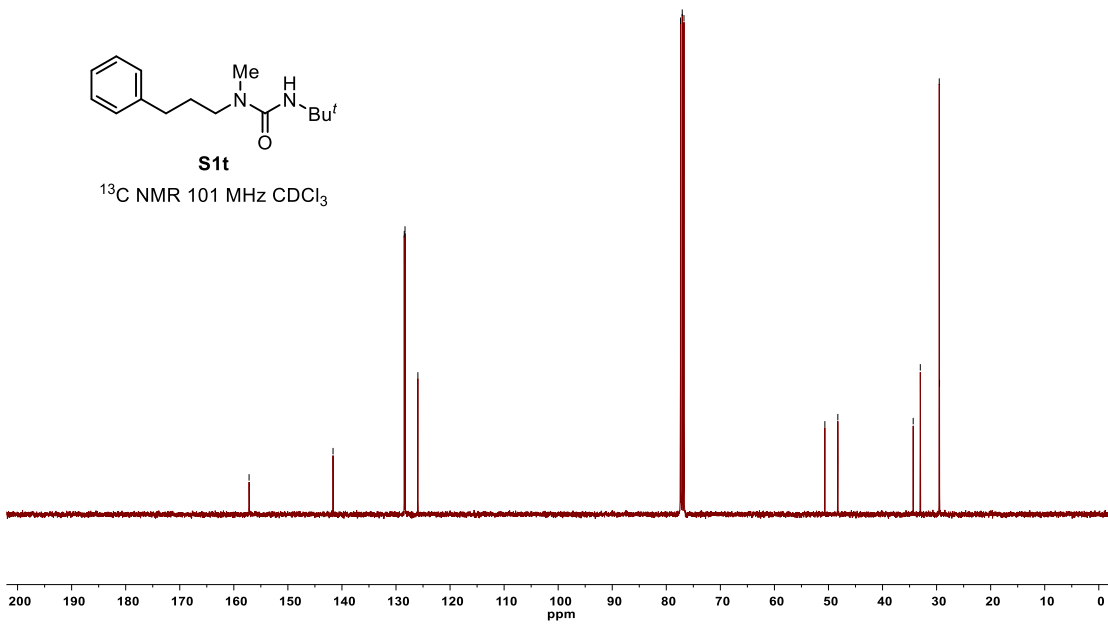

22801439\_20240301091924A258.22801436.fid  
s-Bn CDCl<sub>3</sub> 0229

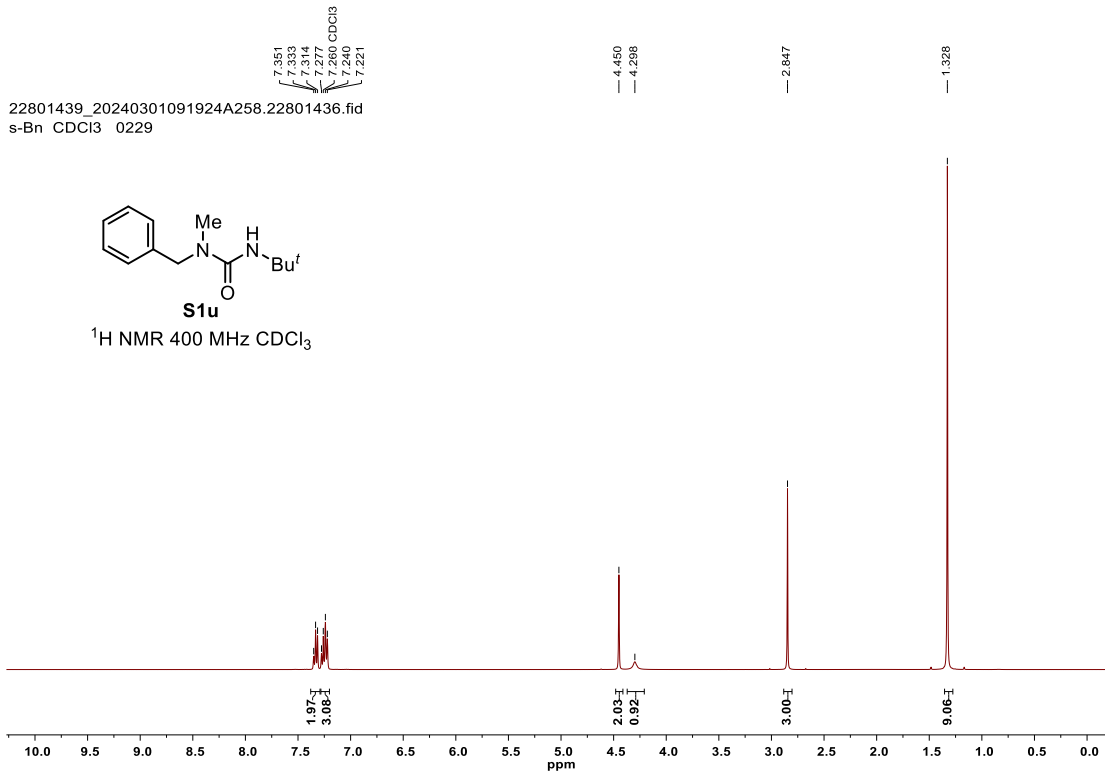

22801439\_20240301091924A258.22801435.fid  
s-Bn CDCl<sub>3</sub> 0229

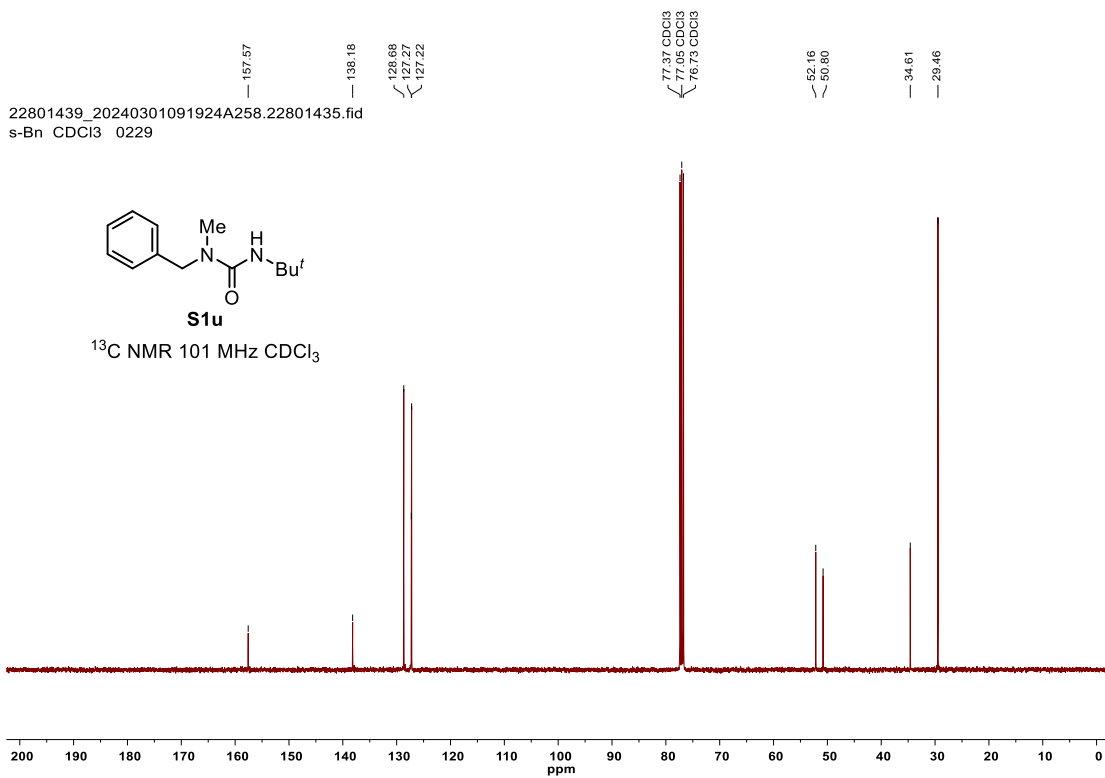

22801439\_20240301091924A258.22801434.fid  
 s-alpha-Me-Naph CDCl3 0229

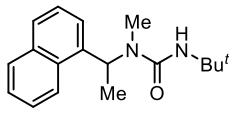

**S1v**

<sup>1</sup>H NMR 400 MHz CDCl<sub>3</sub>

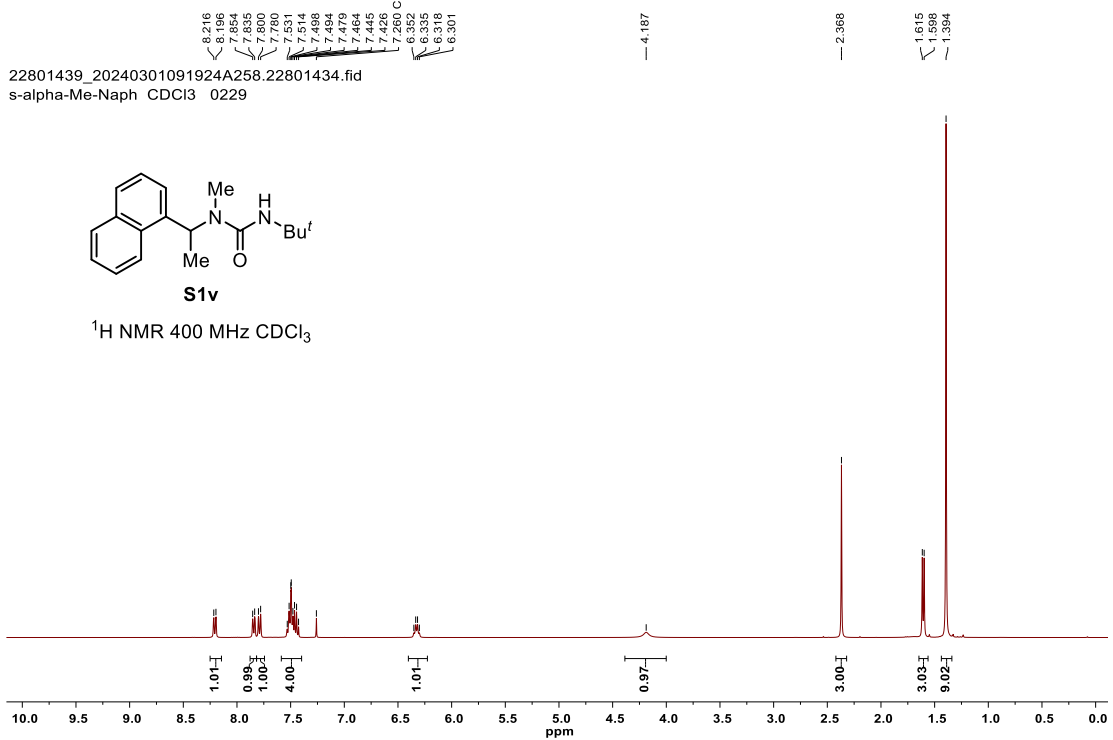

22801439\_20240301091924A258.22801433.fid  
 s-alpha-Me-Naph CDCl3 0229

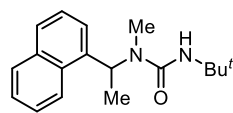

**S1v**

<sup>13</sup>C NMR 101 MHz CDCl<sub>3</sub>

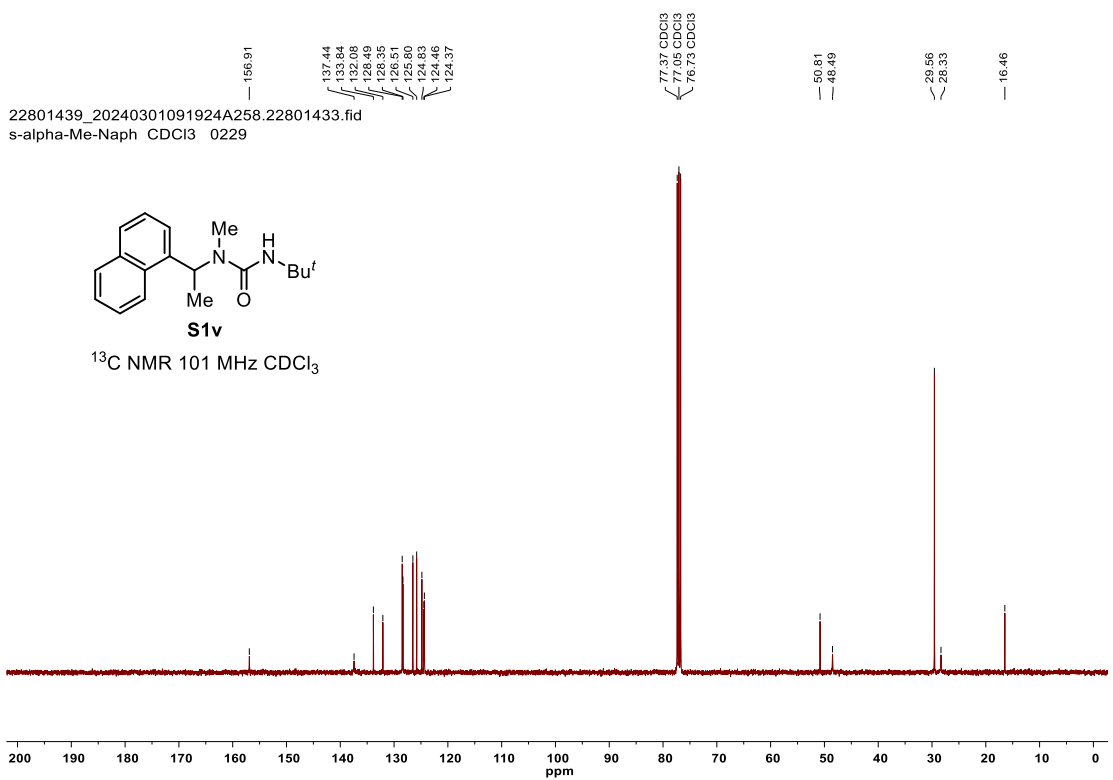

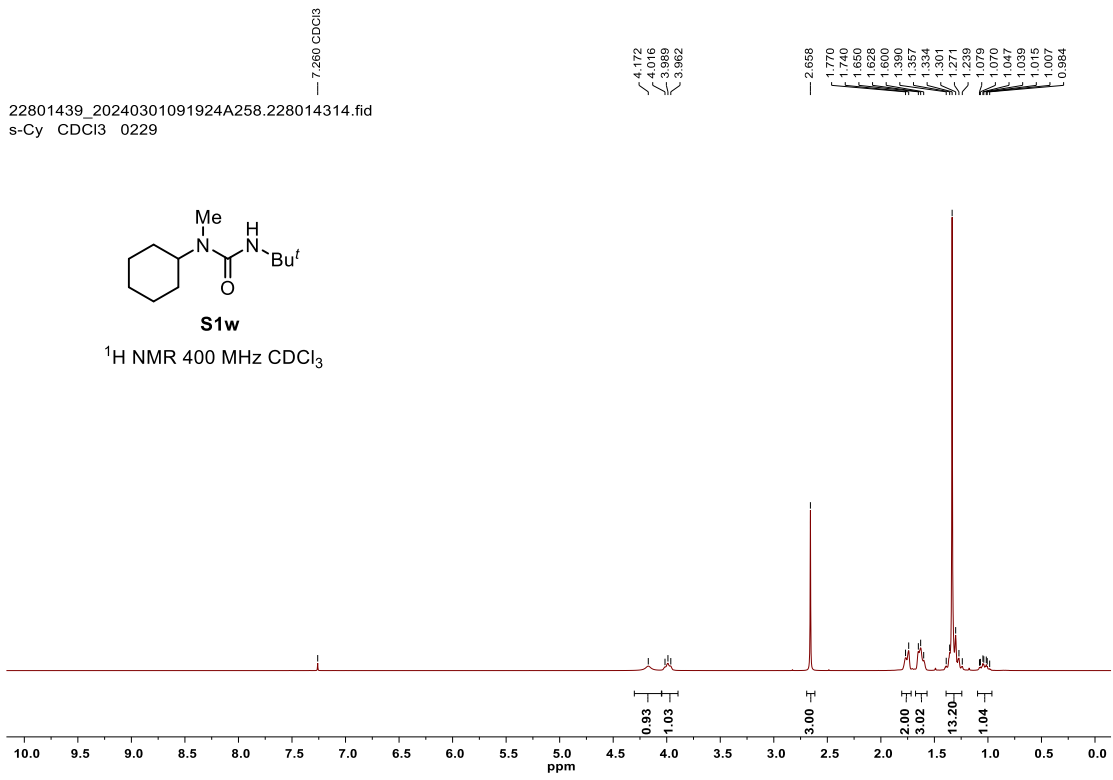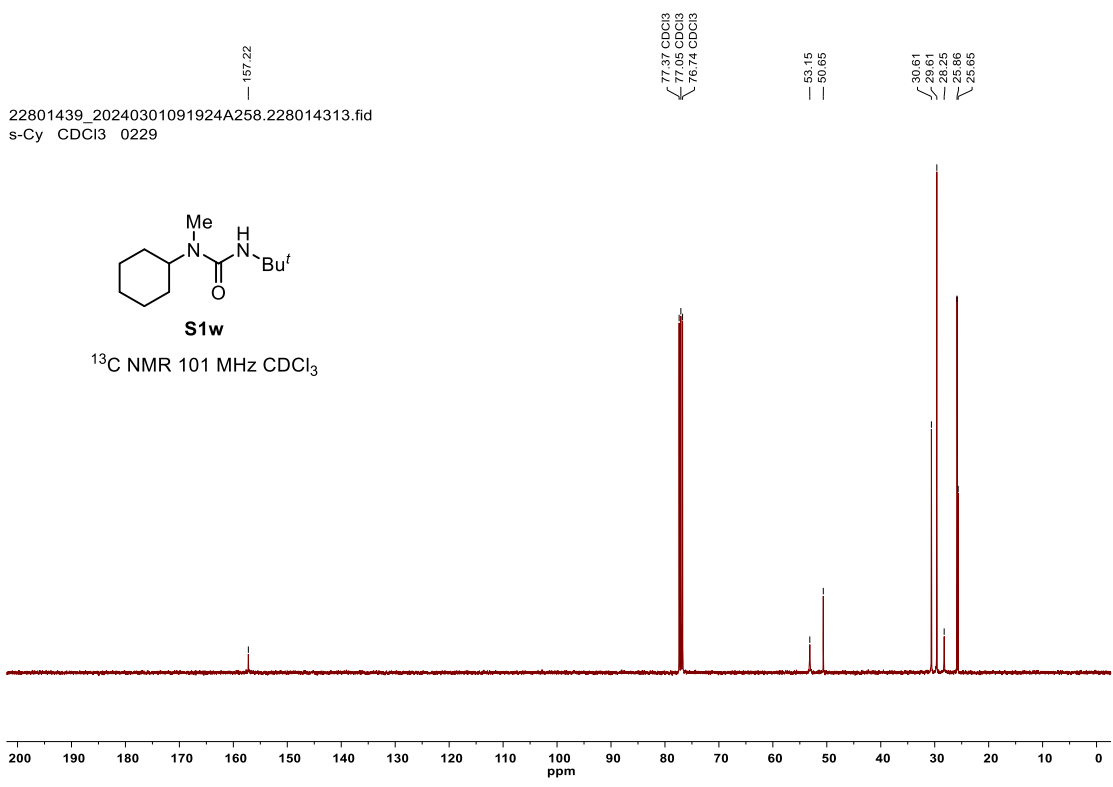

MYJ-0110-s-thiophene.1.fid

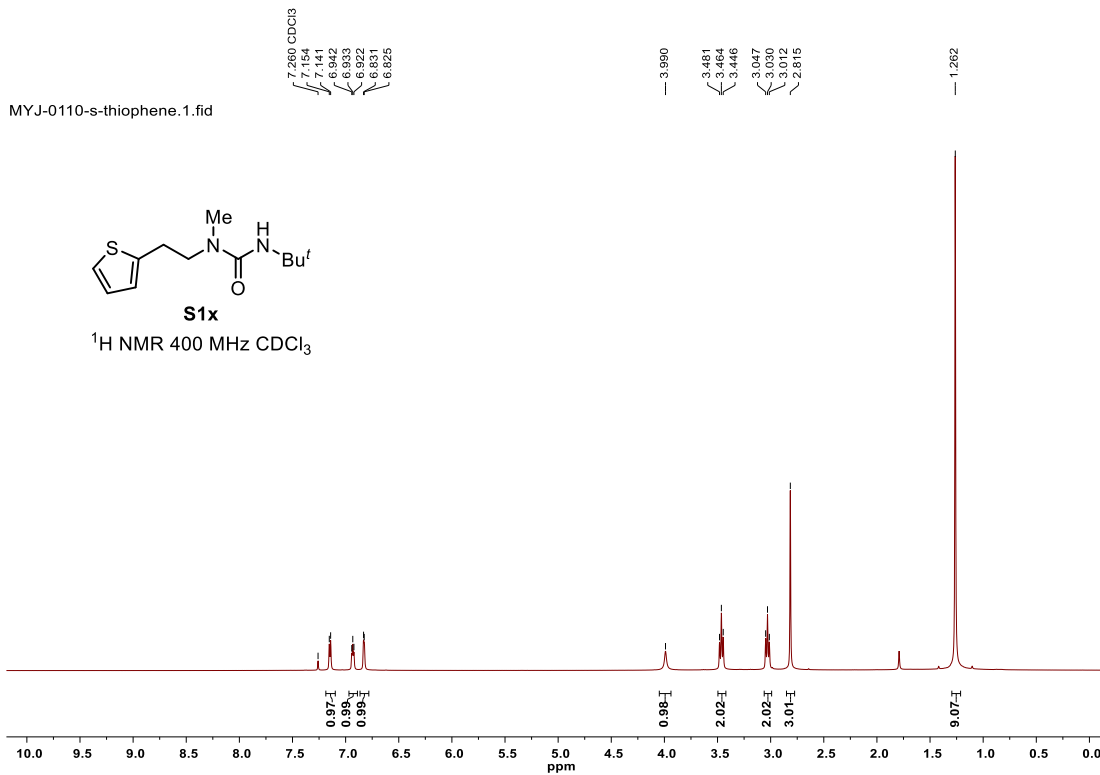

MYJ-0110-s-thiophene.2.fid

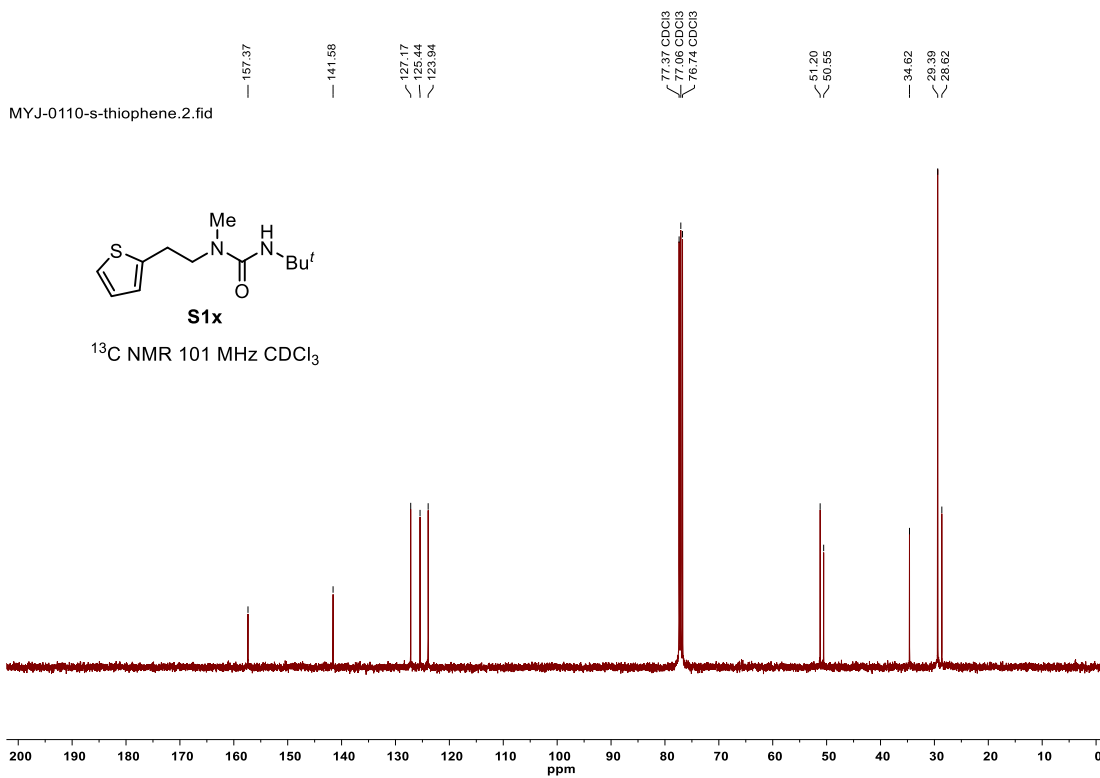

MYJ-0109-s-tryptamine.1.fid

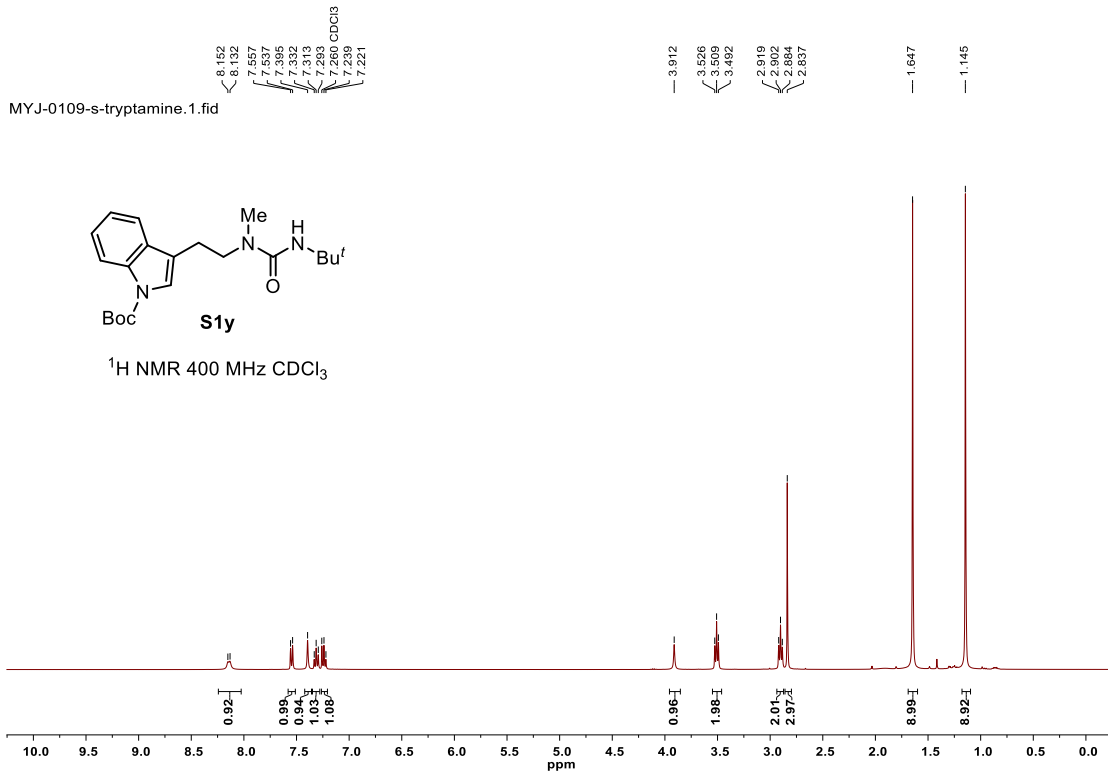

MYJ-0109-s-tryptamine.2.fid

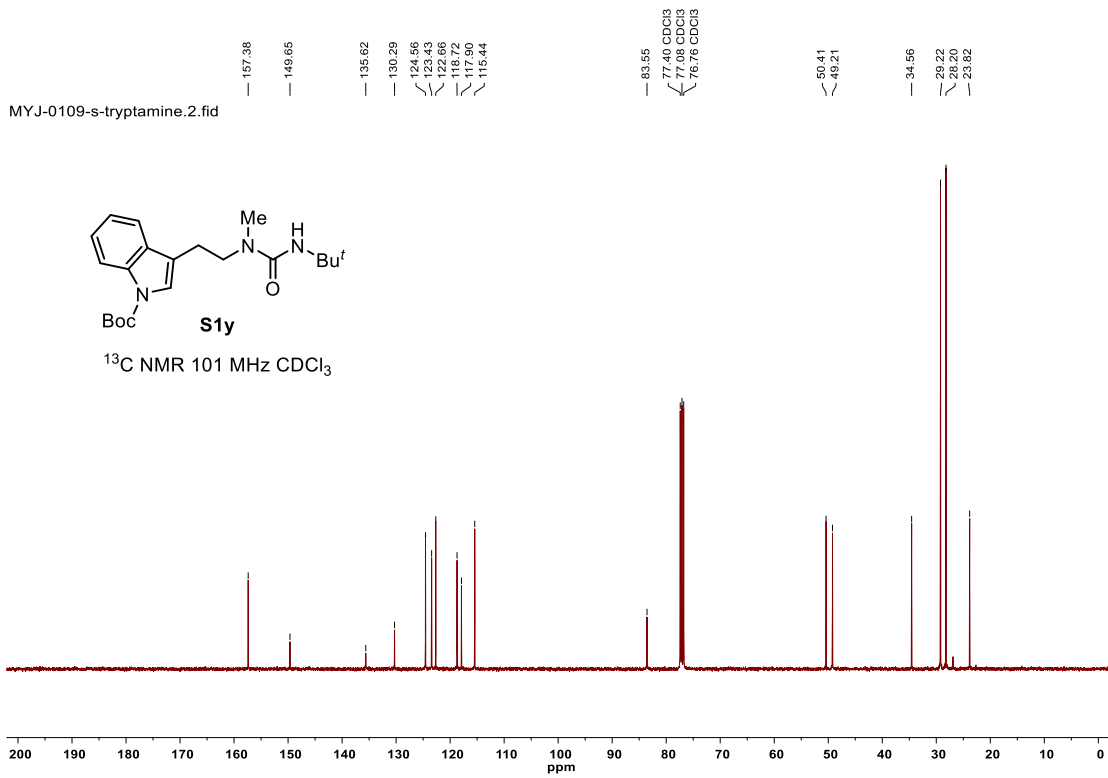

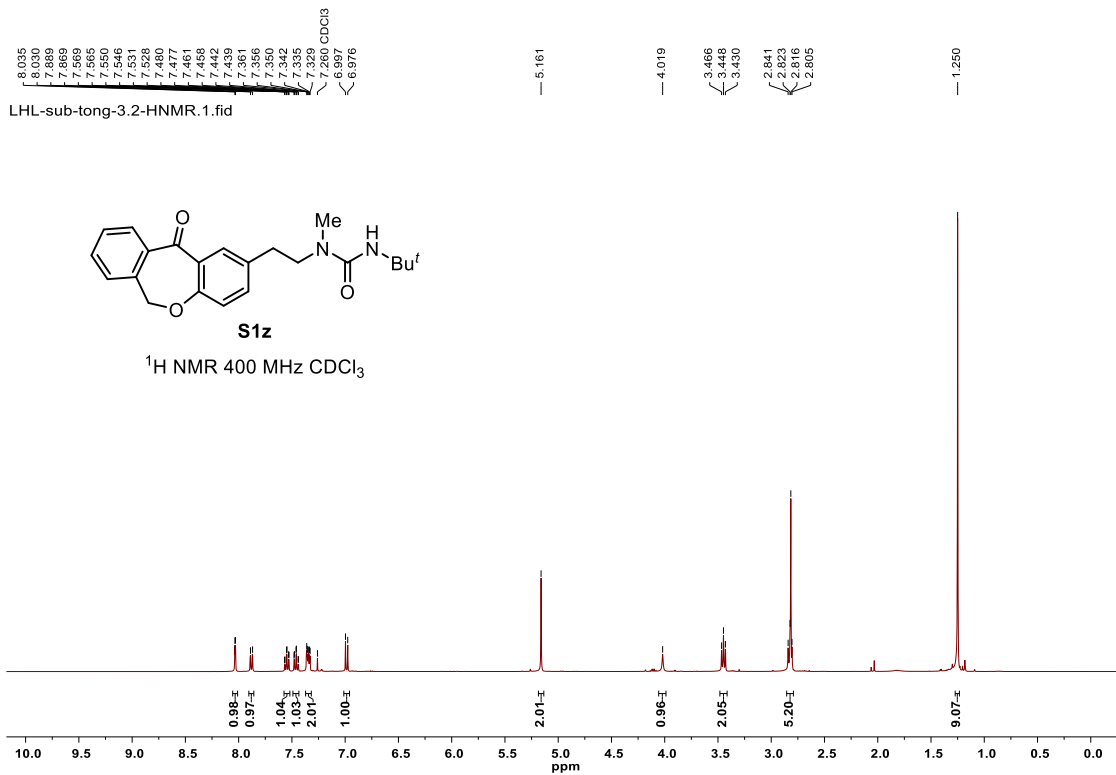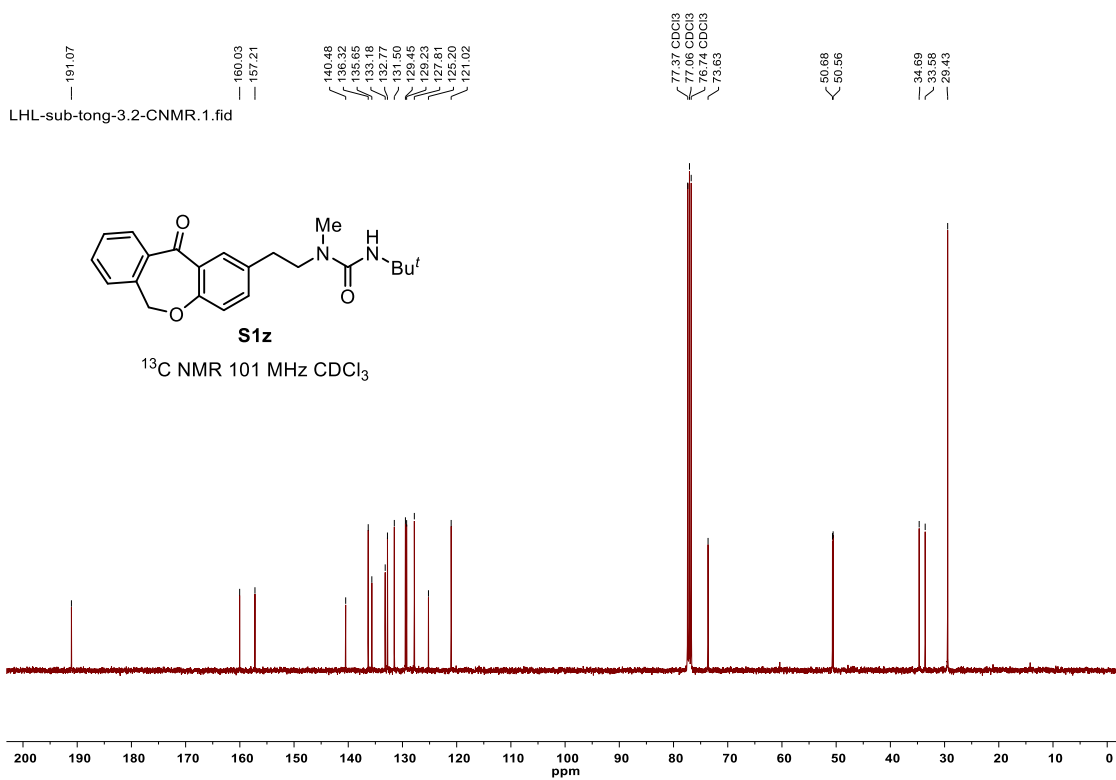



22801439\_20240301091924A258.22801432.fid  
s-ibuprofen CDCl<sub>3</sub> 0229

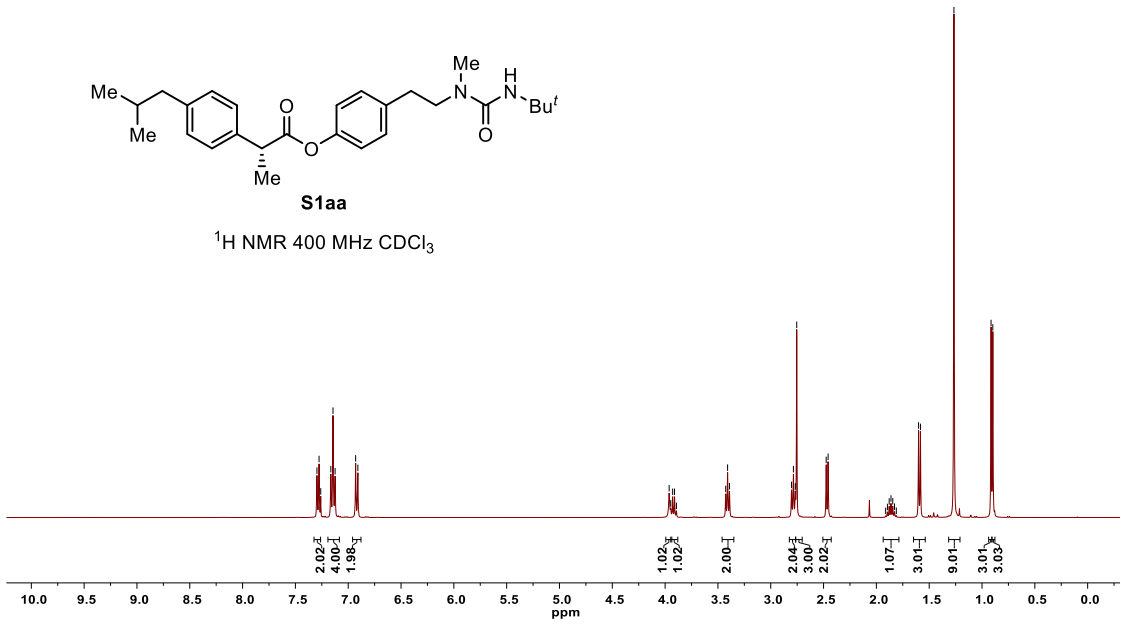

22801439\_20240301091924A258.22801431.fid  
s-ibuprofen CDCl<sub>3</sub> 0229

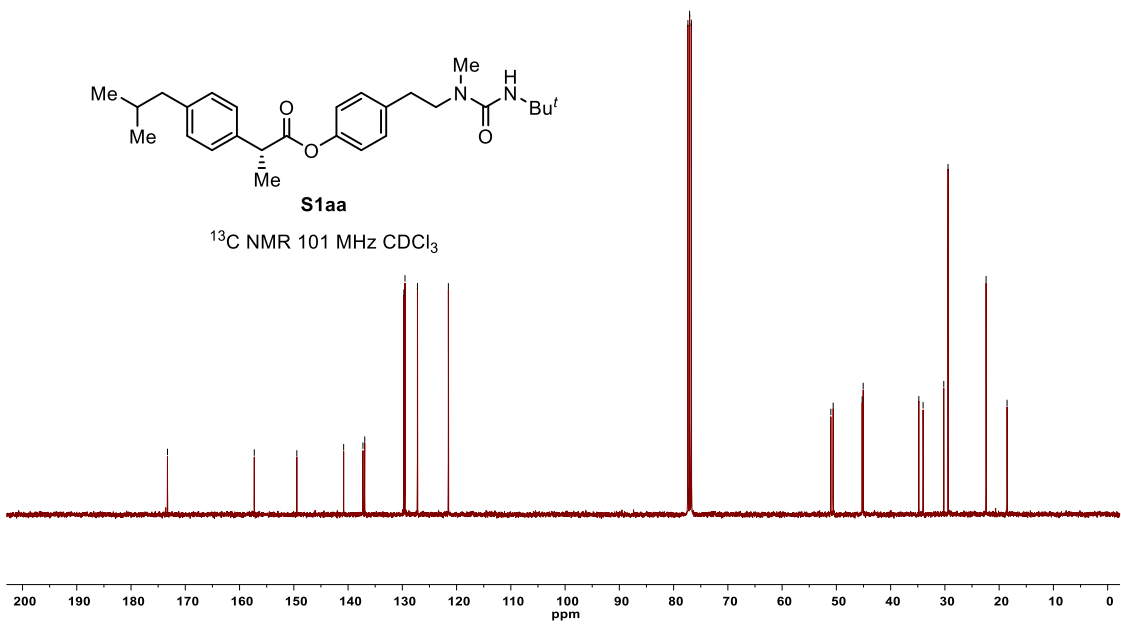

MJY-0309-s-Fe.1.fid

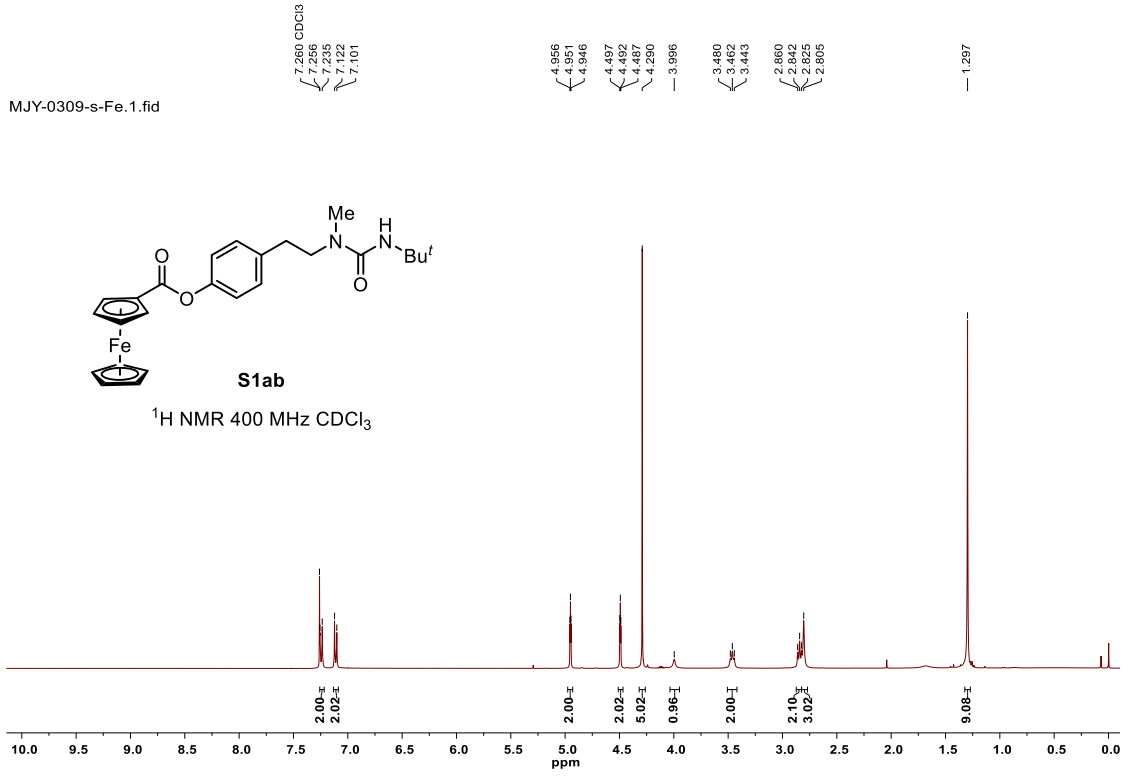

MYJ-0309-S-+FE.1.fid

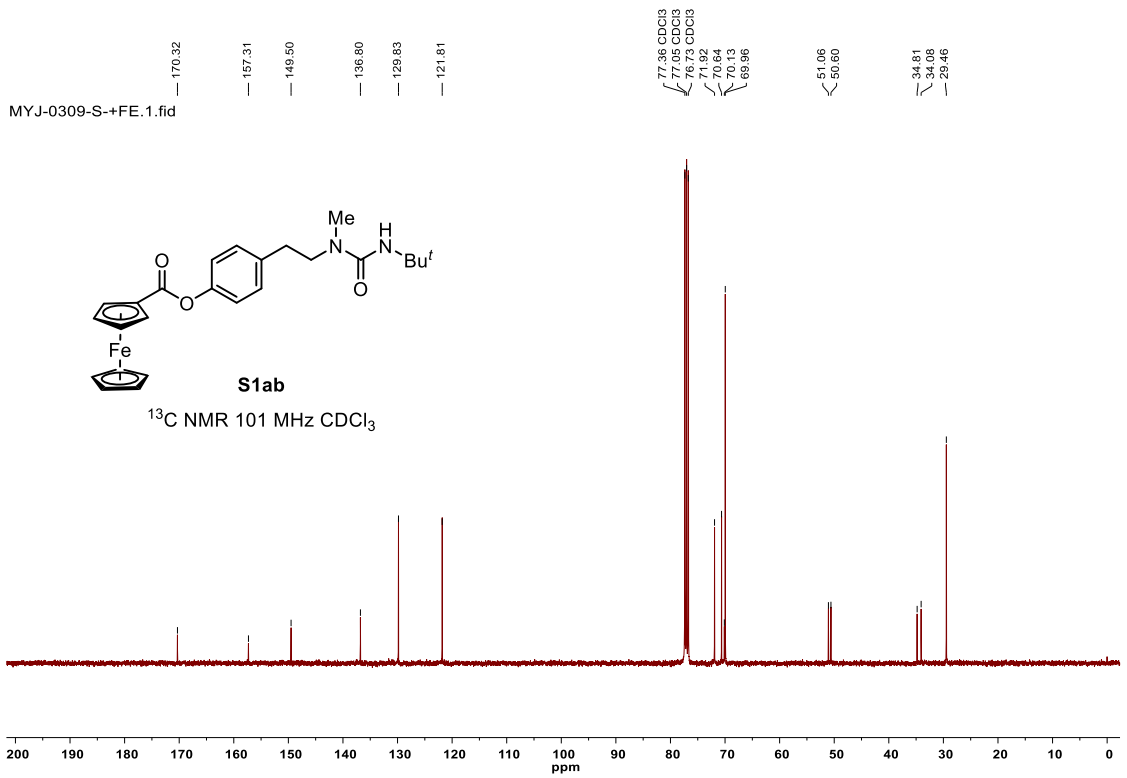

32801511\_20240329093338A192.32801515.fid  
MYJ-s-olefin-H CDCl<sub>3</sub> 0328

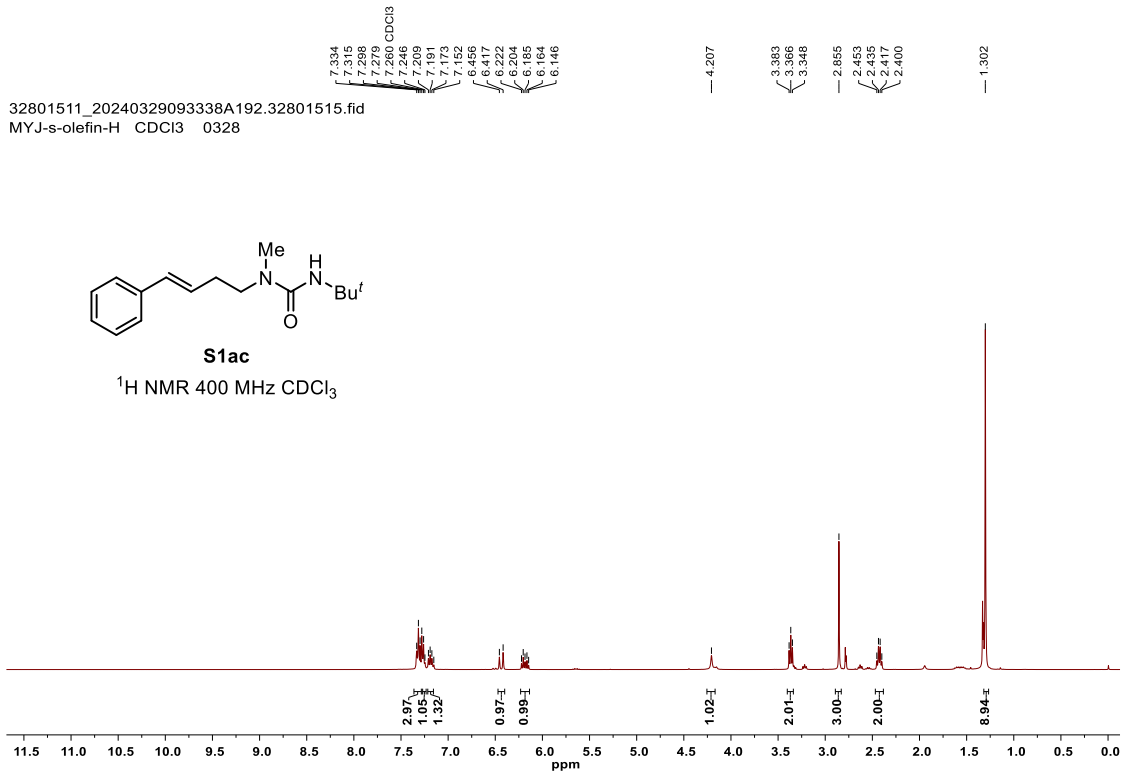

32801511\_20240329093338A192.32801516.fid  
MYJ-s-olefin-H CDCl<sub>3</sub> 0328

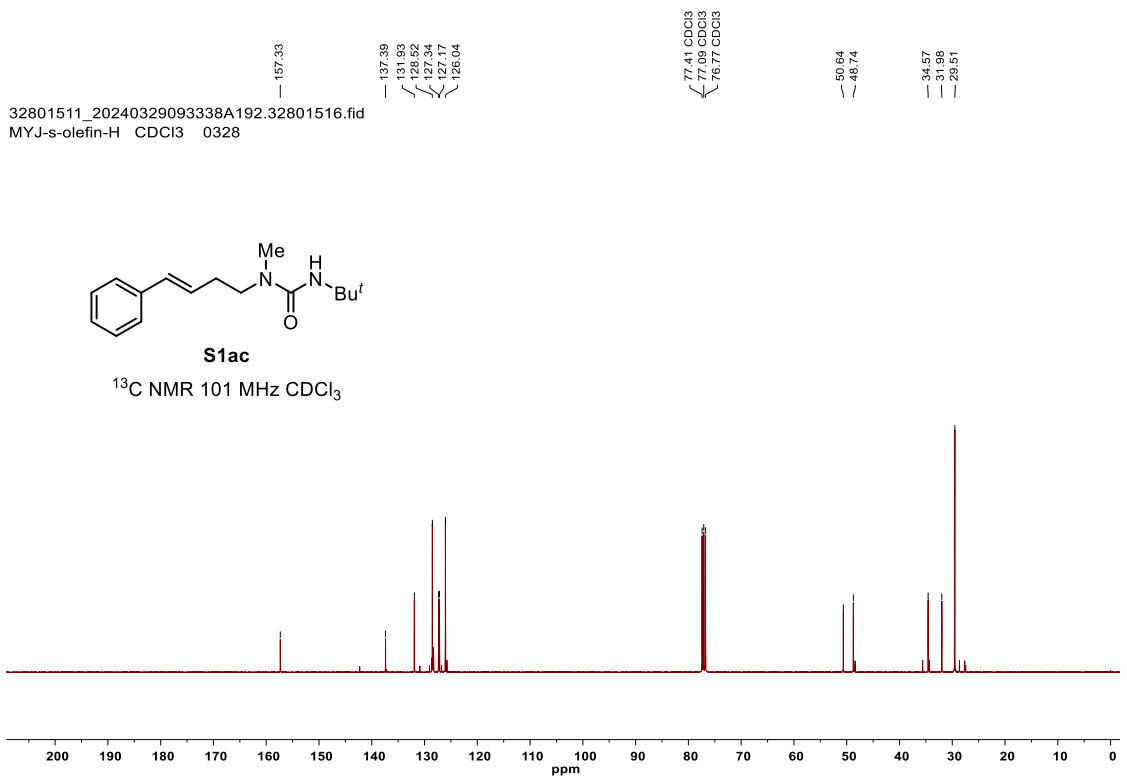

PQ-1-CN/氢谱

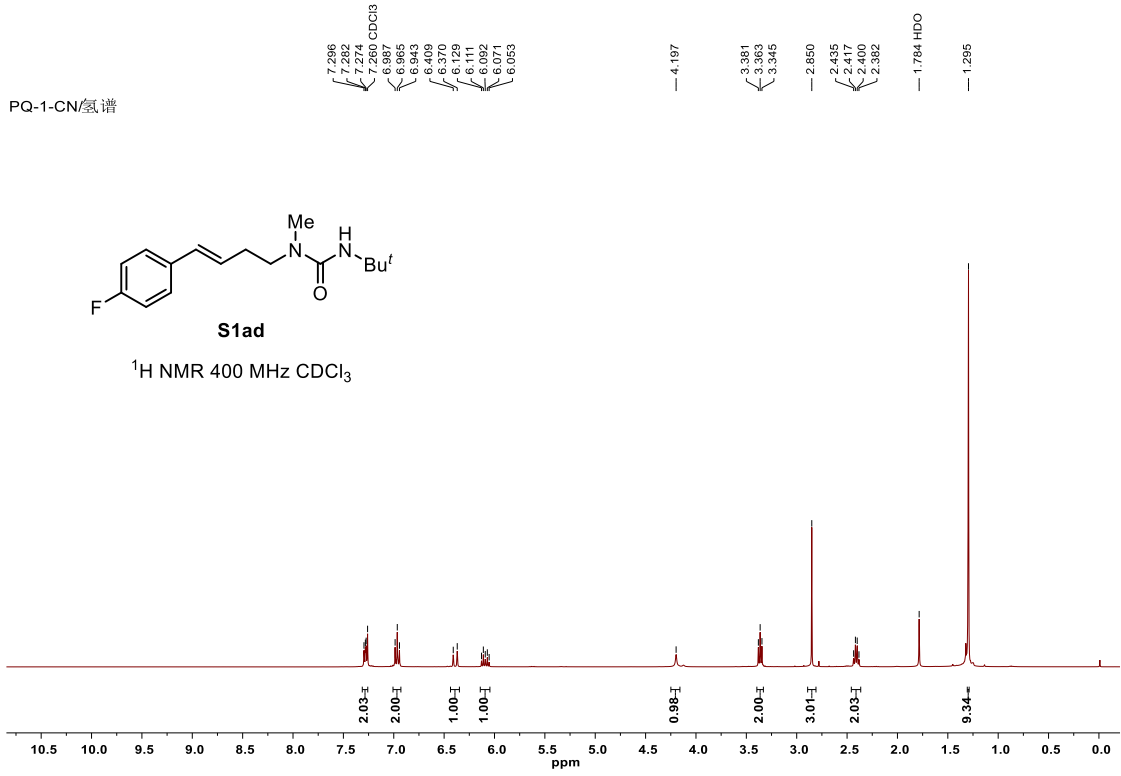

PQ-1-CN/碳谱  
PQ-1-CN CDCl3 0312

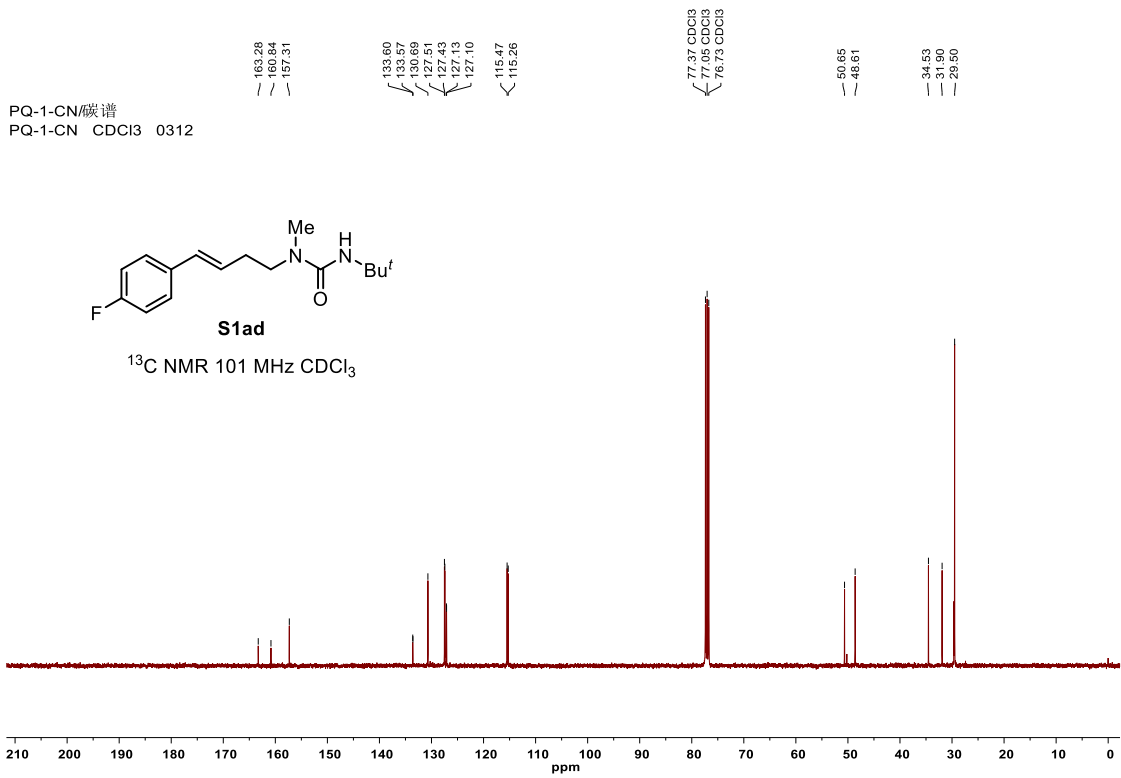

PQ-2-CN/氢谱

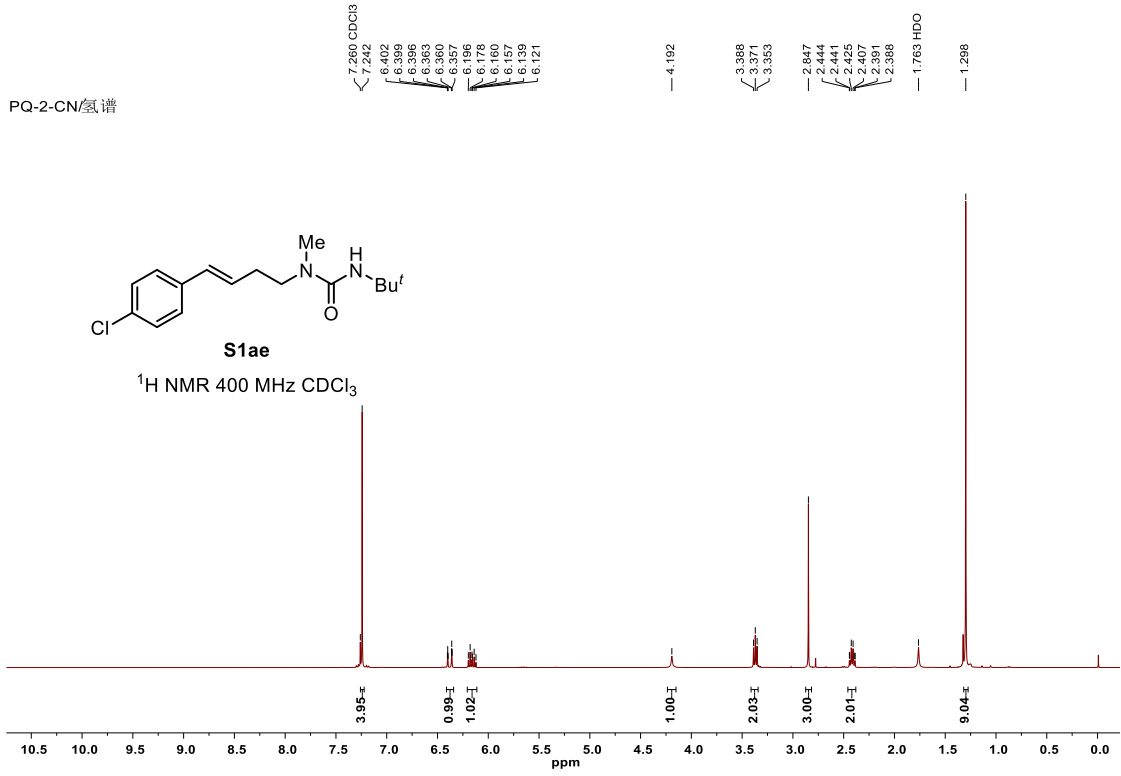

PQ-2-CN/碳谱  
PQ-2-CN CDCl<sub>3</sub> 0312

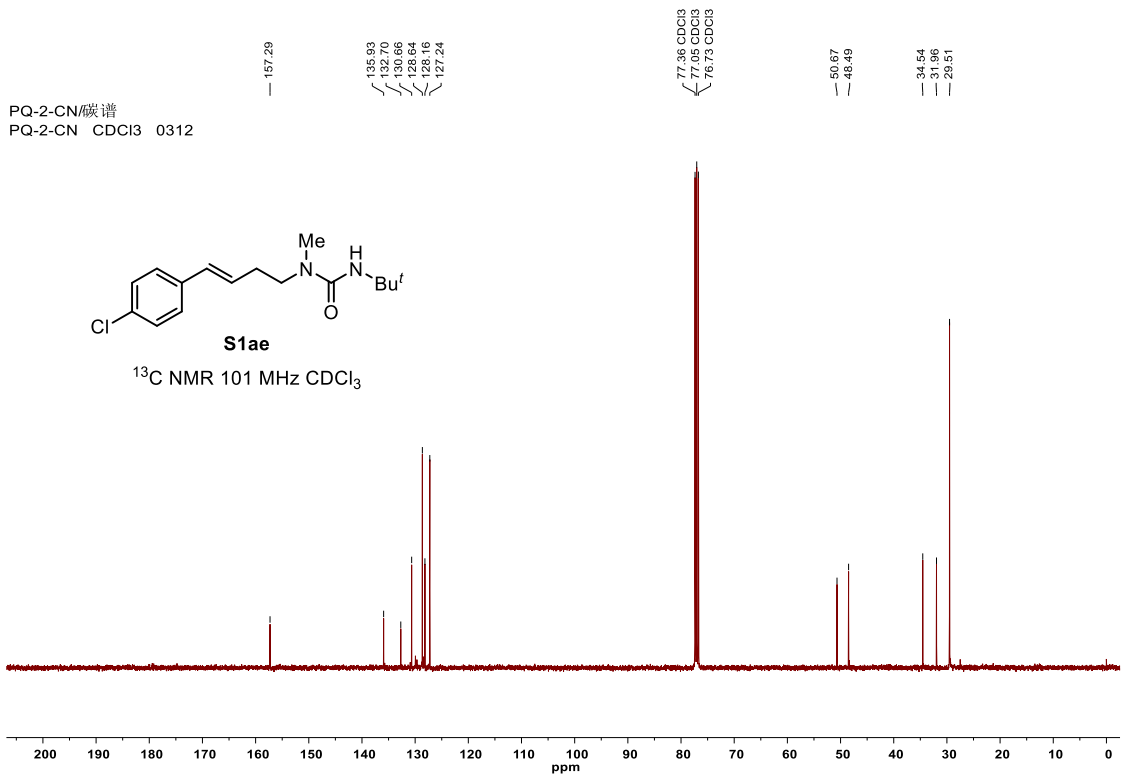

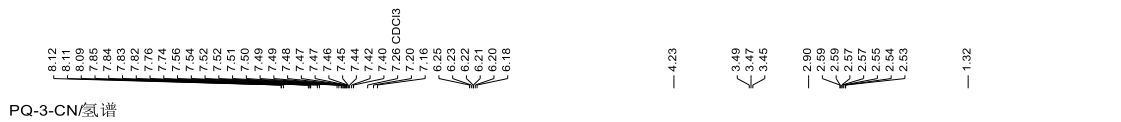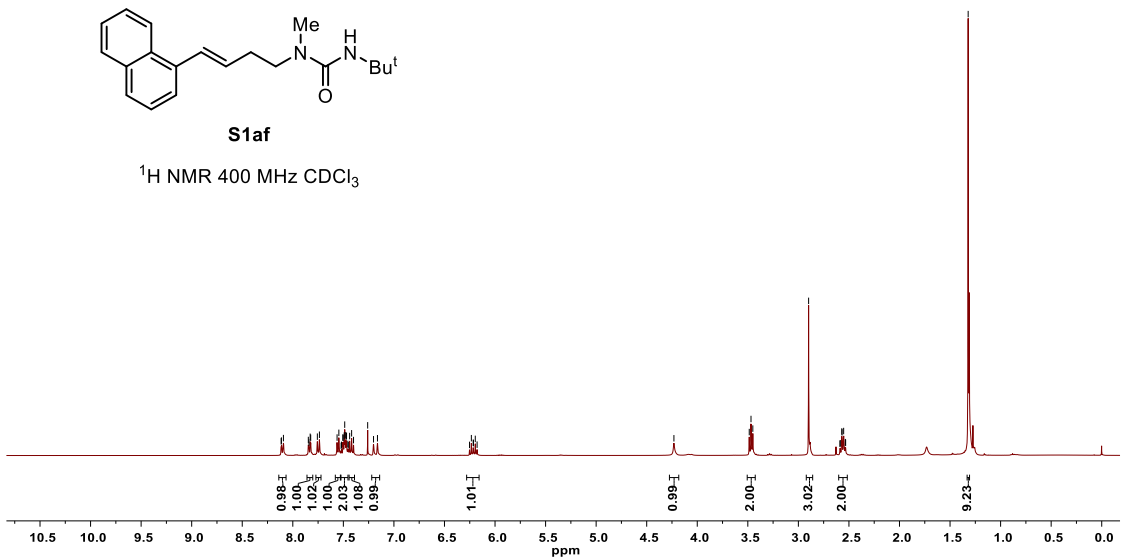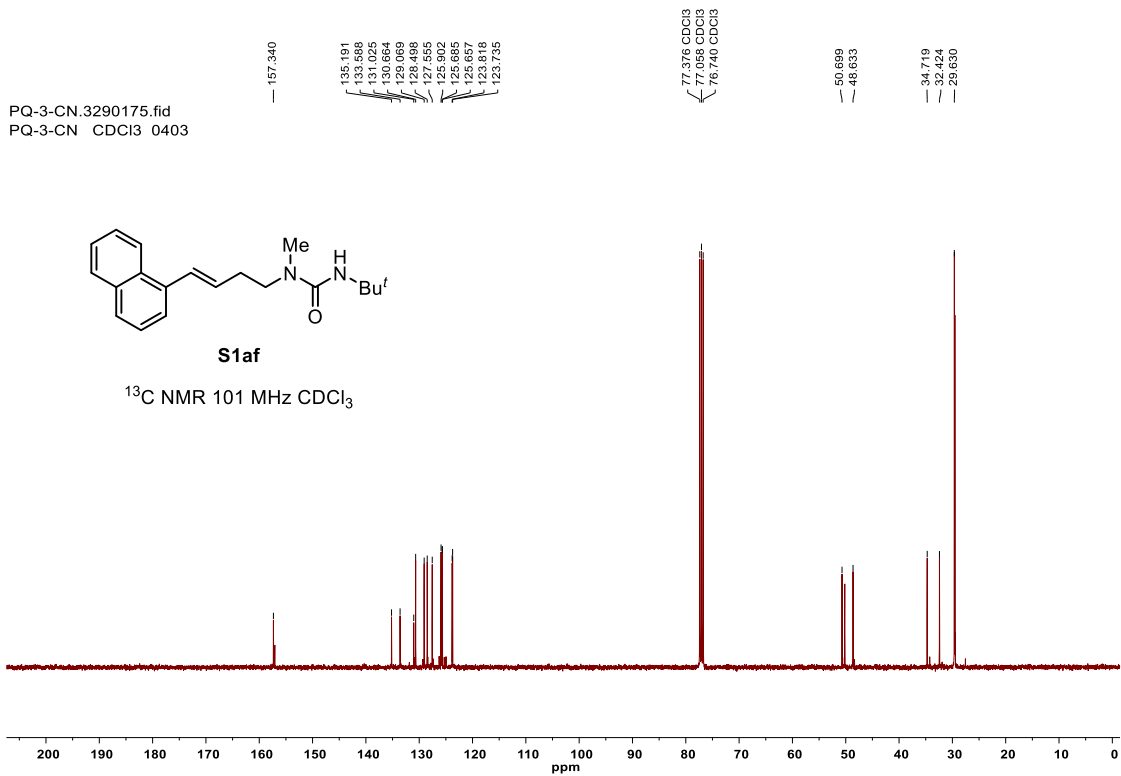

PQ-5-CN/氢谱  
PQ-5-CN CDCl<sub>3</sub> 0321

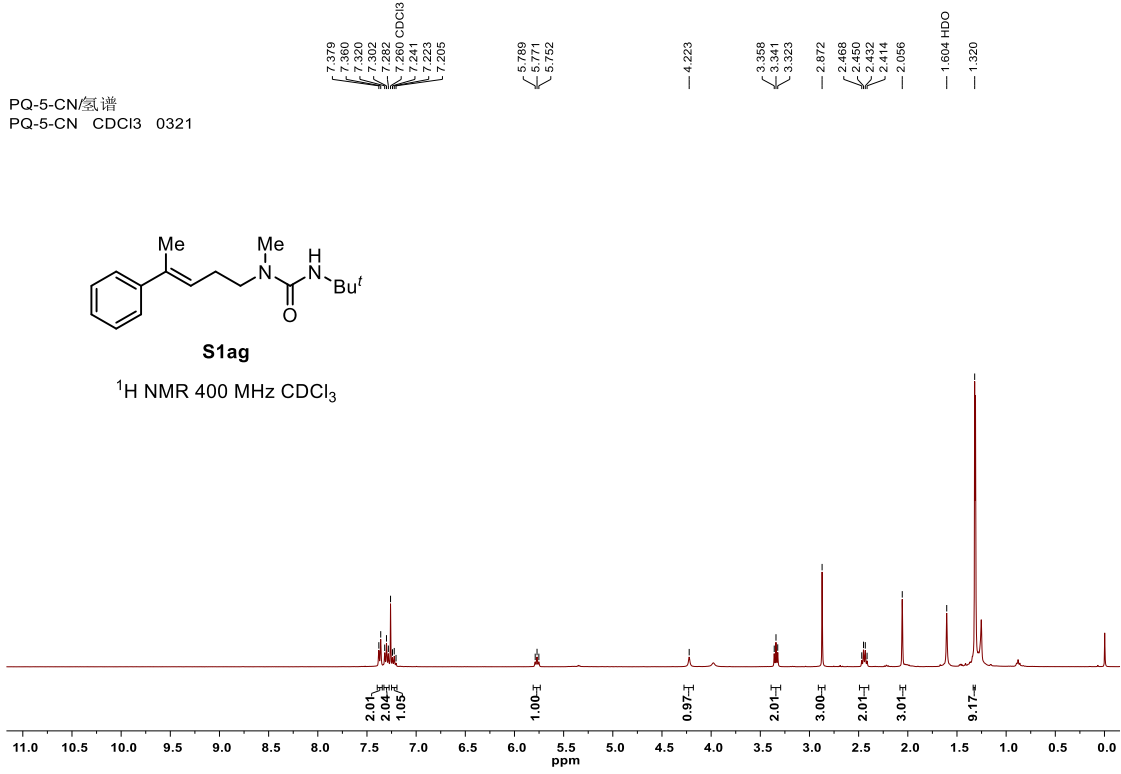

PQ-5-CN/碳谱  
PQ-5-CN CDCl<sub>3</sub> 0321

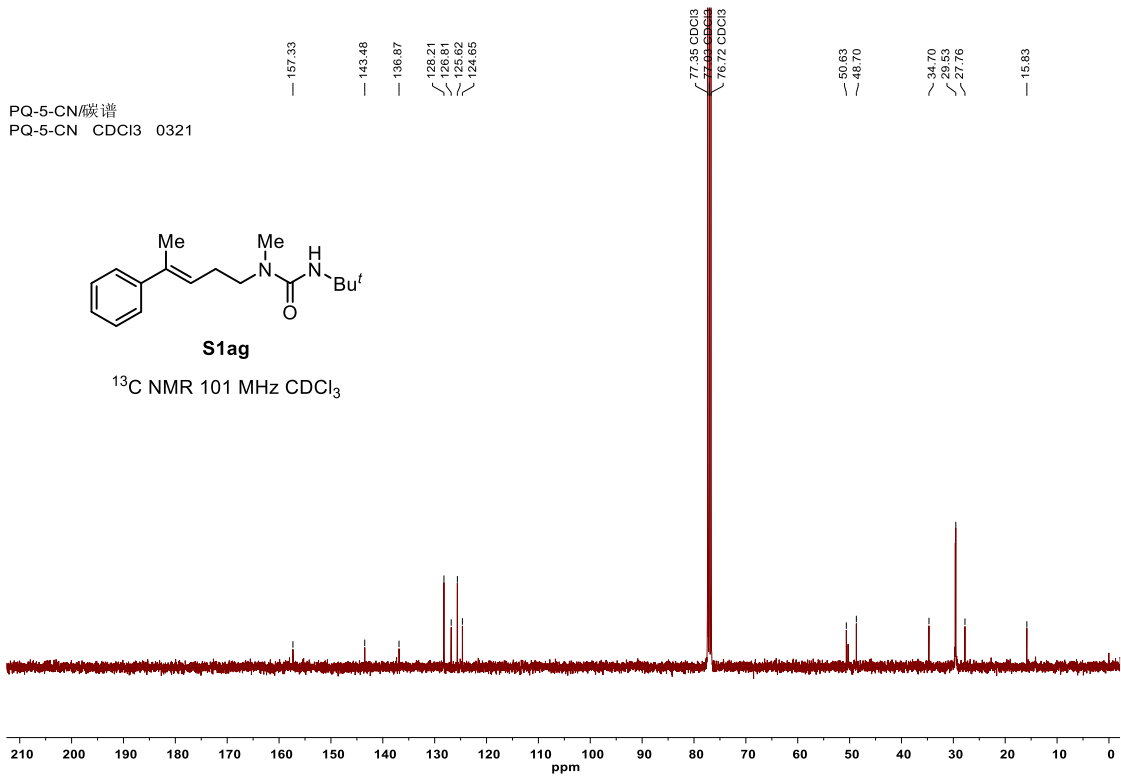

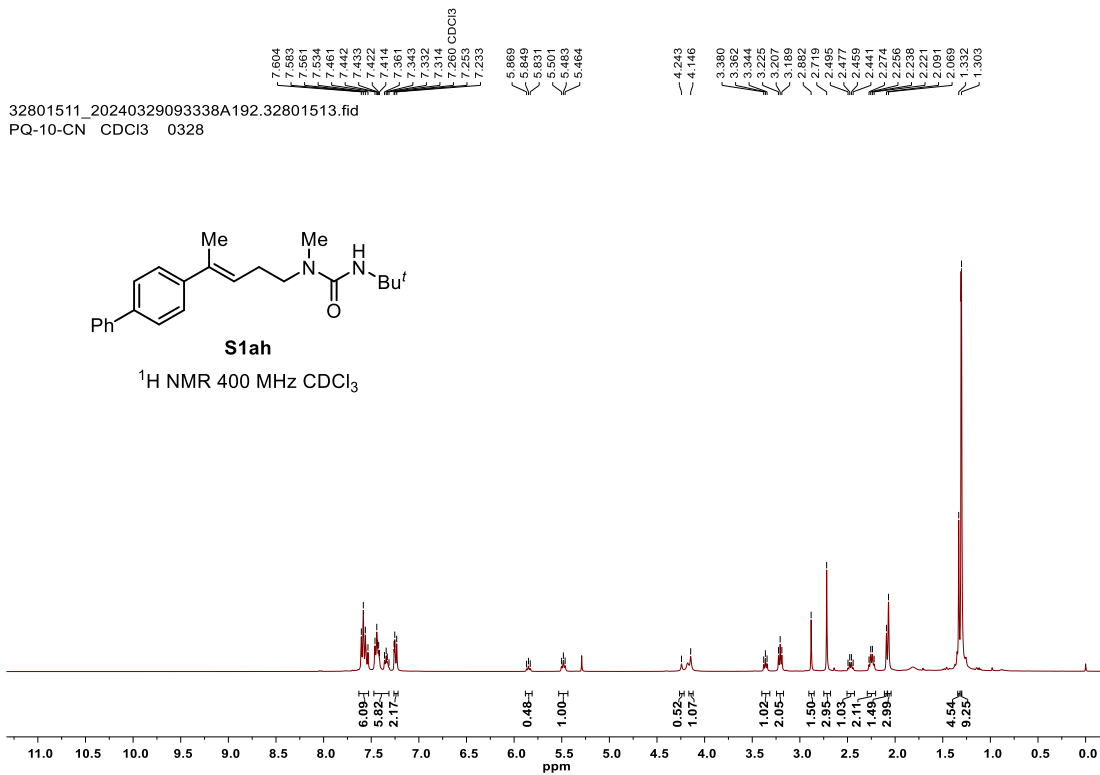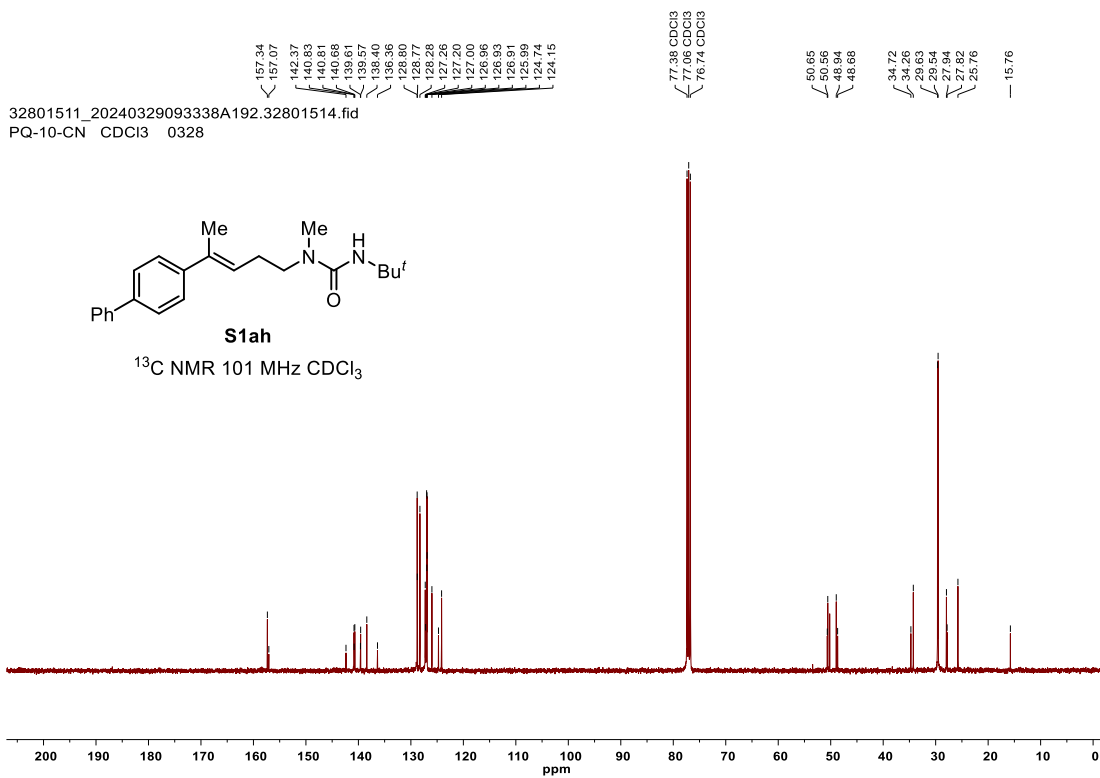



PQ-9-CN 氢谱  
PQ-9-CN CDCl<sub>3</sub> 0321

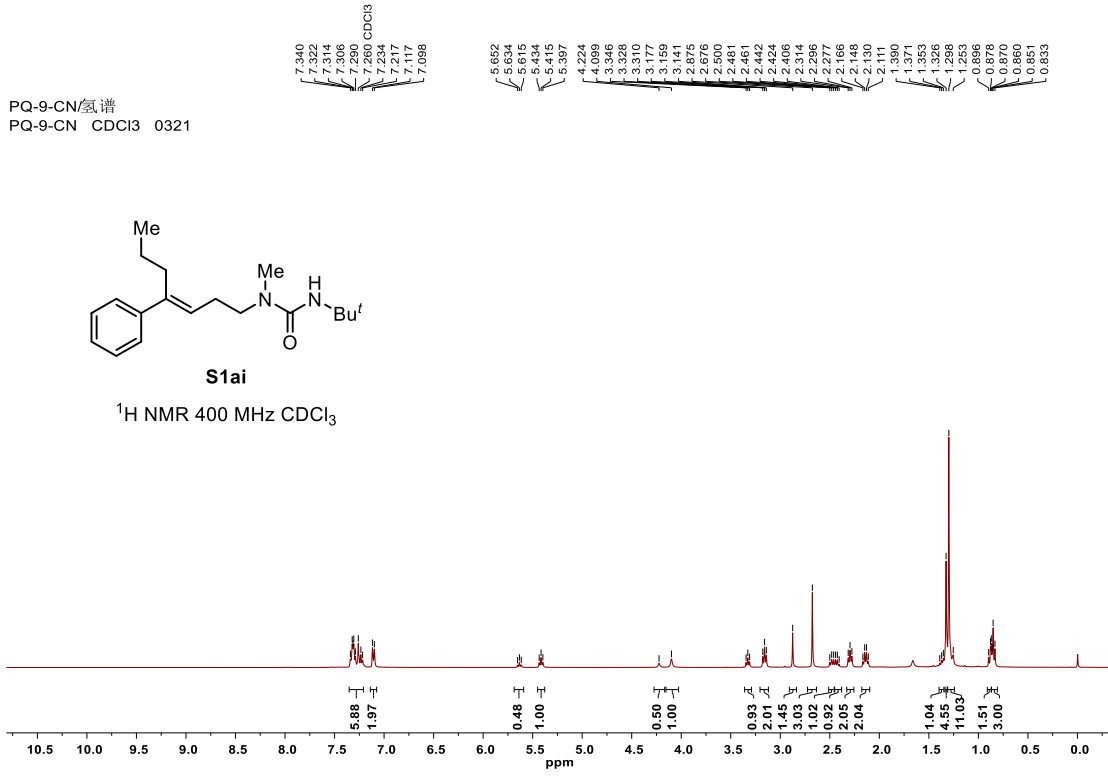

PQ-9-CN 碳谱  
PQ-9-CN CDCl<sub>3</sub> 0321

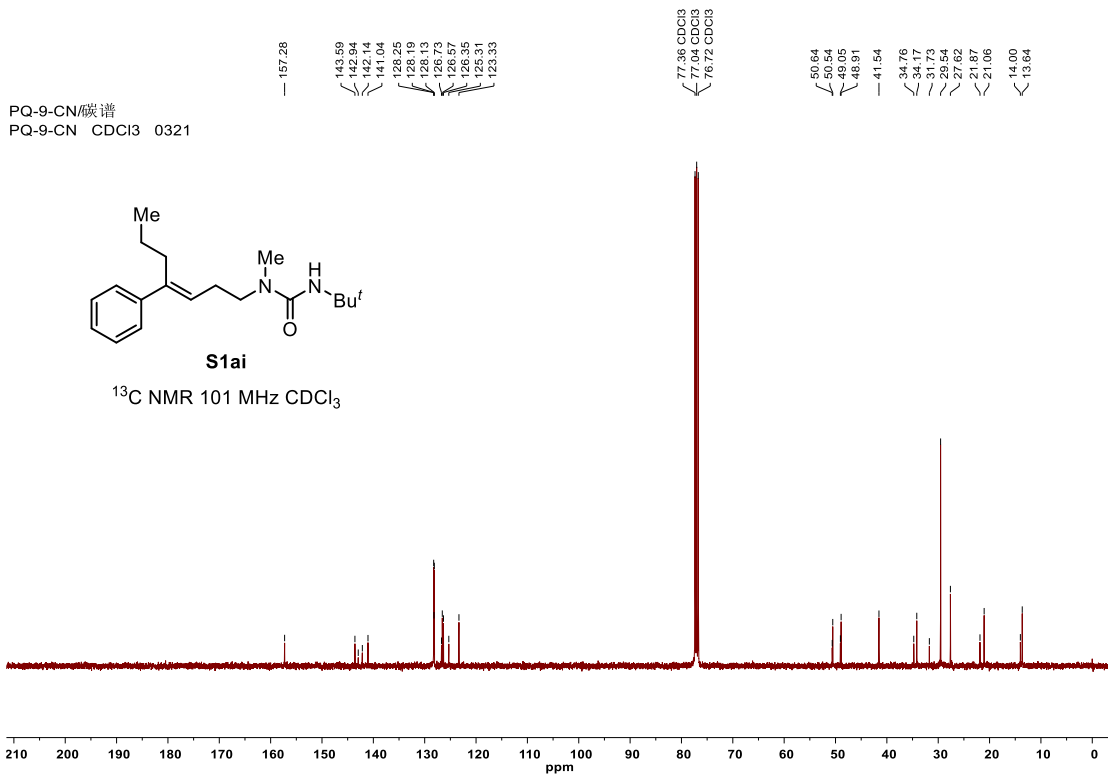

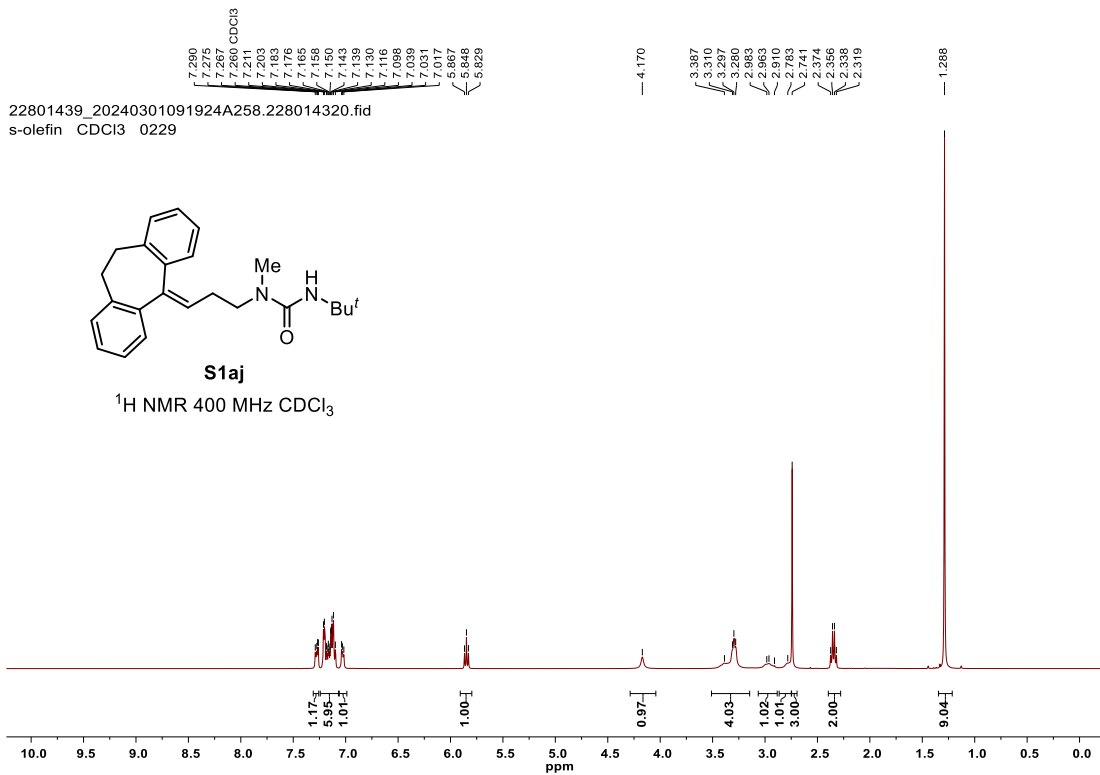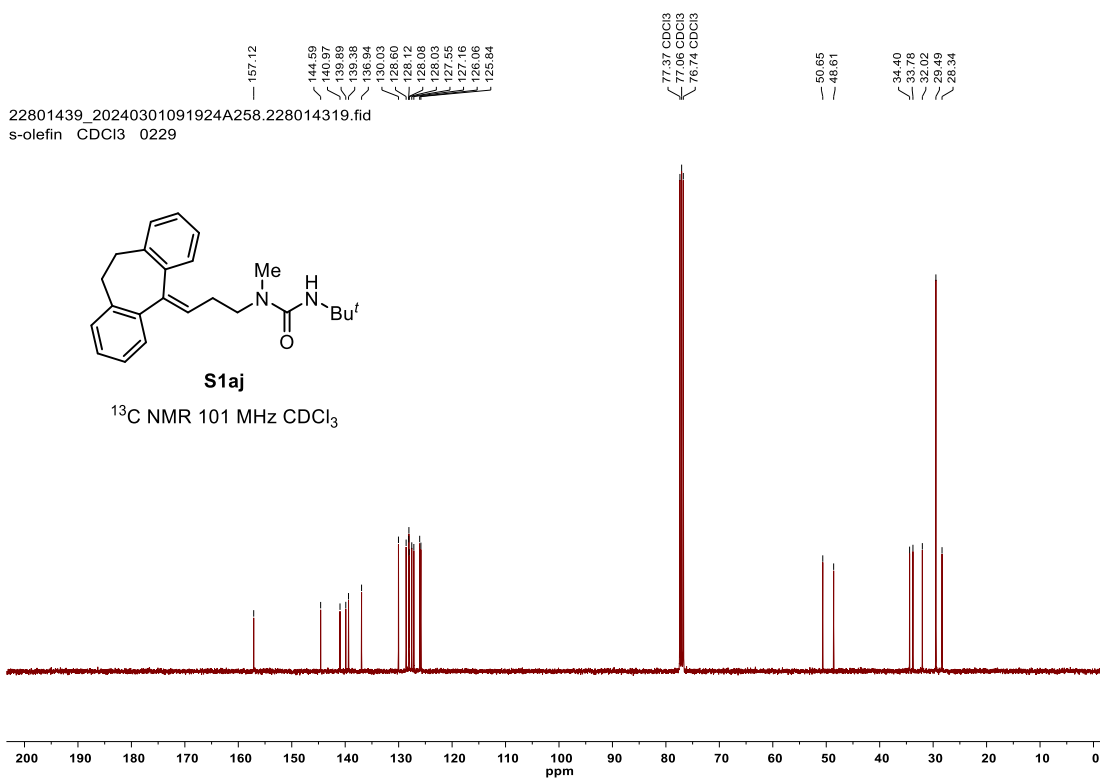

MYJ-cyclohexene.40201462.fid  
MYJ-s-cyclohexen CDCl3 0403

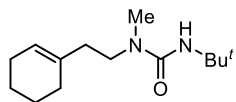

**S1ak**

<sup>1</sup>H NMR 400 MHz CDCl<sub>3</sub>

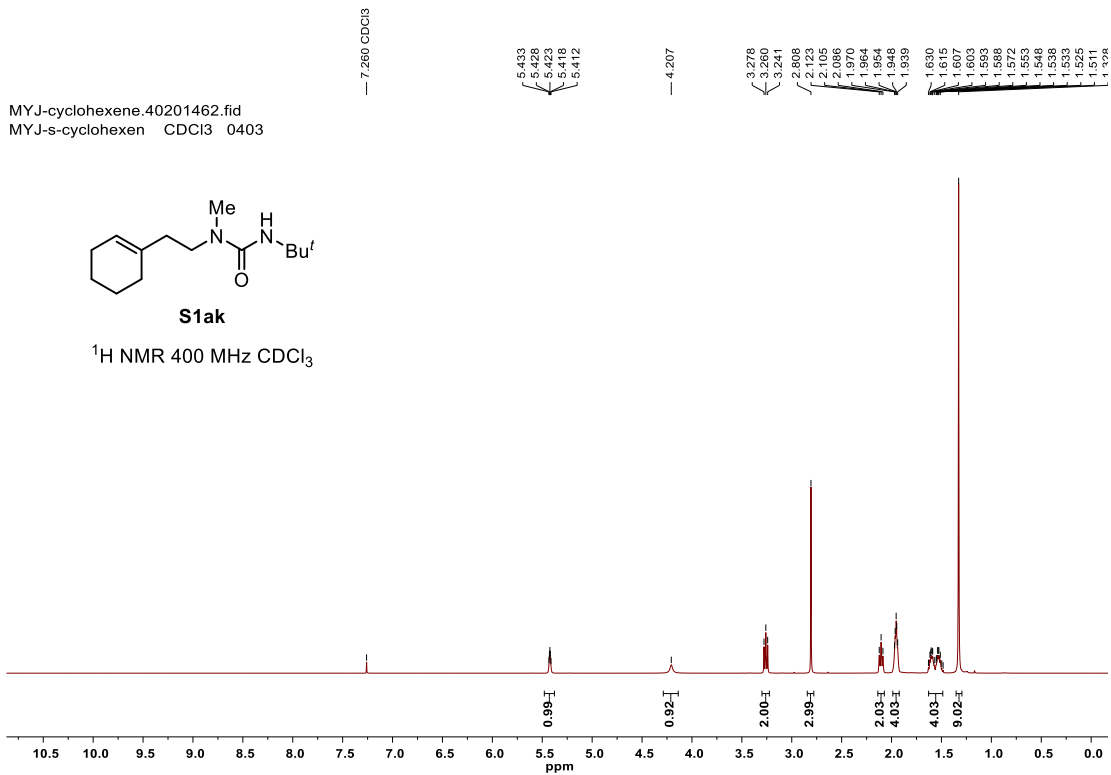

MYJ-cyclohexene.40201461.fid  
MYJ-s-cyclohexen CDCl3 0403

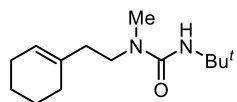

**S1ak**

<sup>13</sup>C NMR 101 MHz CDCl<sub>3</sub>

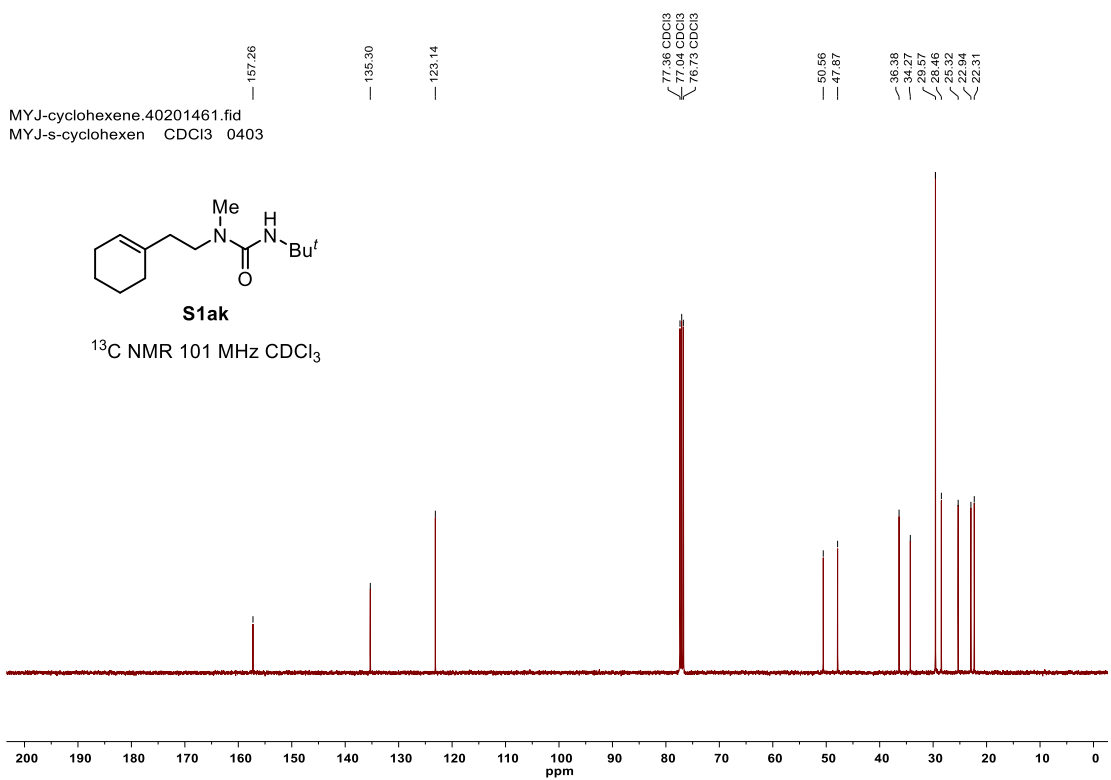

PQ-4-CN.1.fid

7.260 CDCl<sub>3</sub>

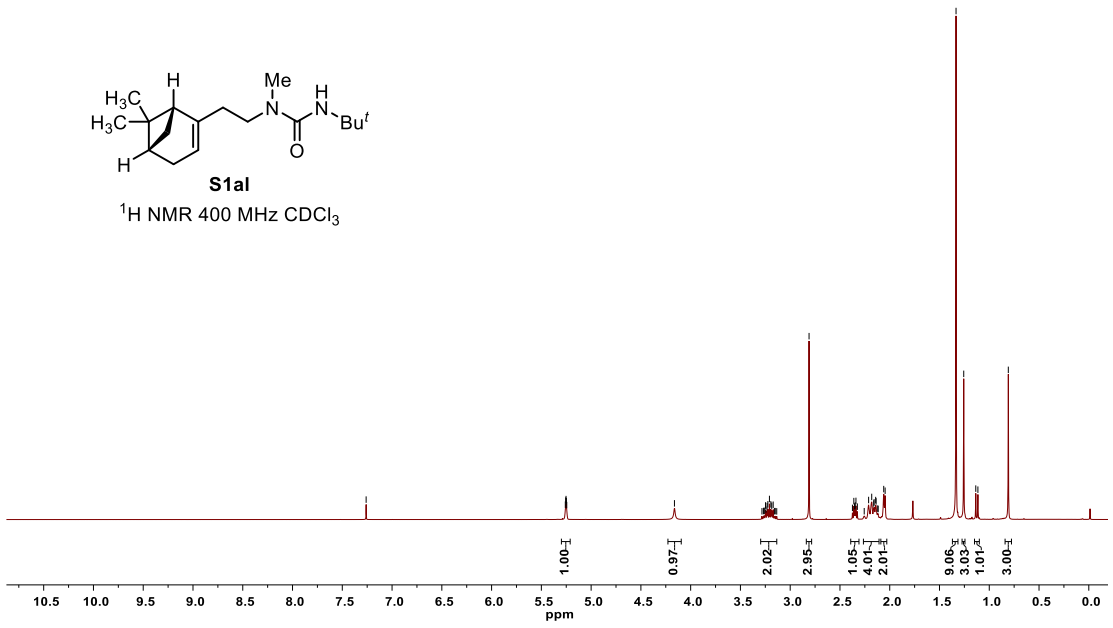

PQ-4-CN.2.fid

157.16

146.53

117.85

77.36 CDCl<sub>3</sub>

77.04 CDCl<sub>3</sub>

76.72 CDCl<sub>3</sub>

50.62

46.76

45.77

40.72

37.99

35.27

34.20

31.32

29.58

26.27

21.19

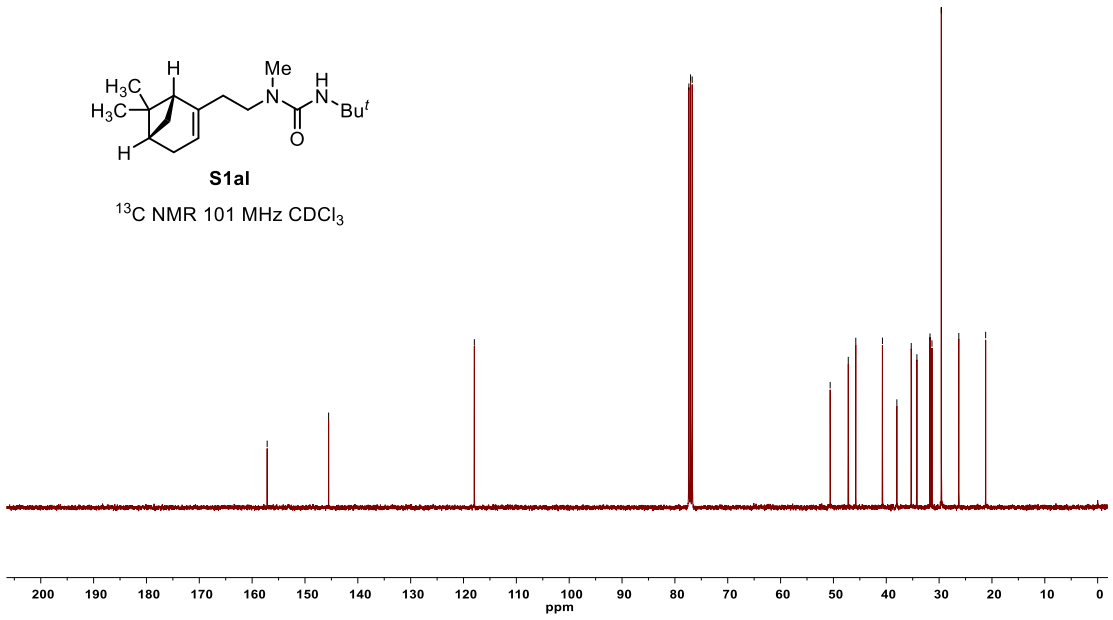

MYJ-alpha-s-D.1.fid

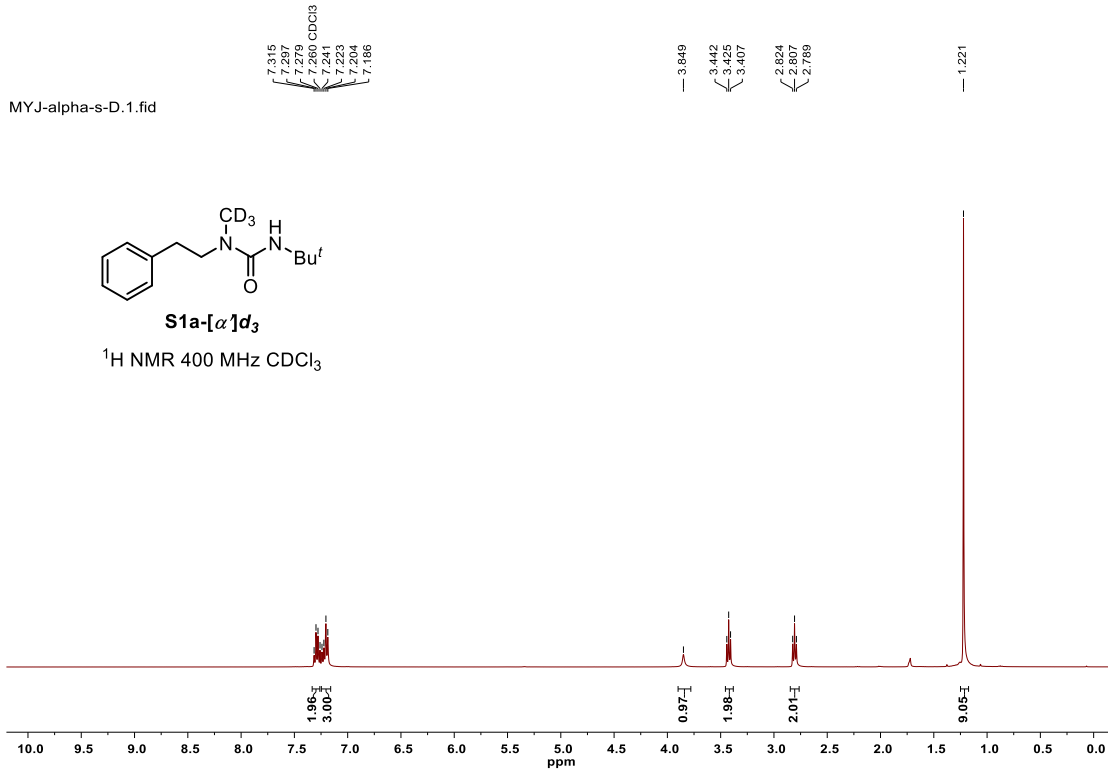

MYJ-2D-S-1016.1.fid

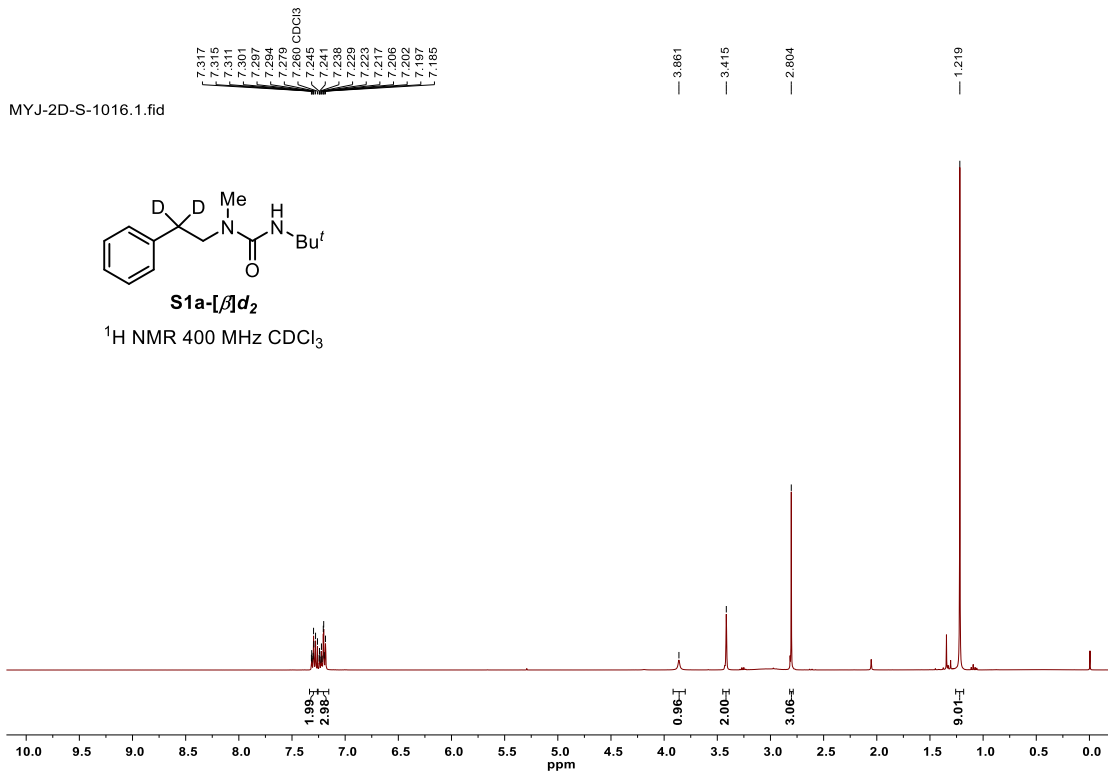

MYJ-4D-S-1013.1.fid

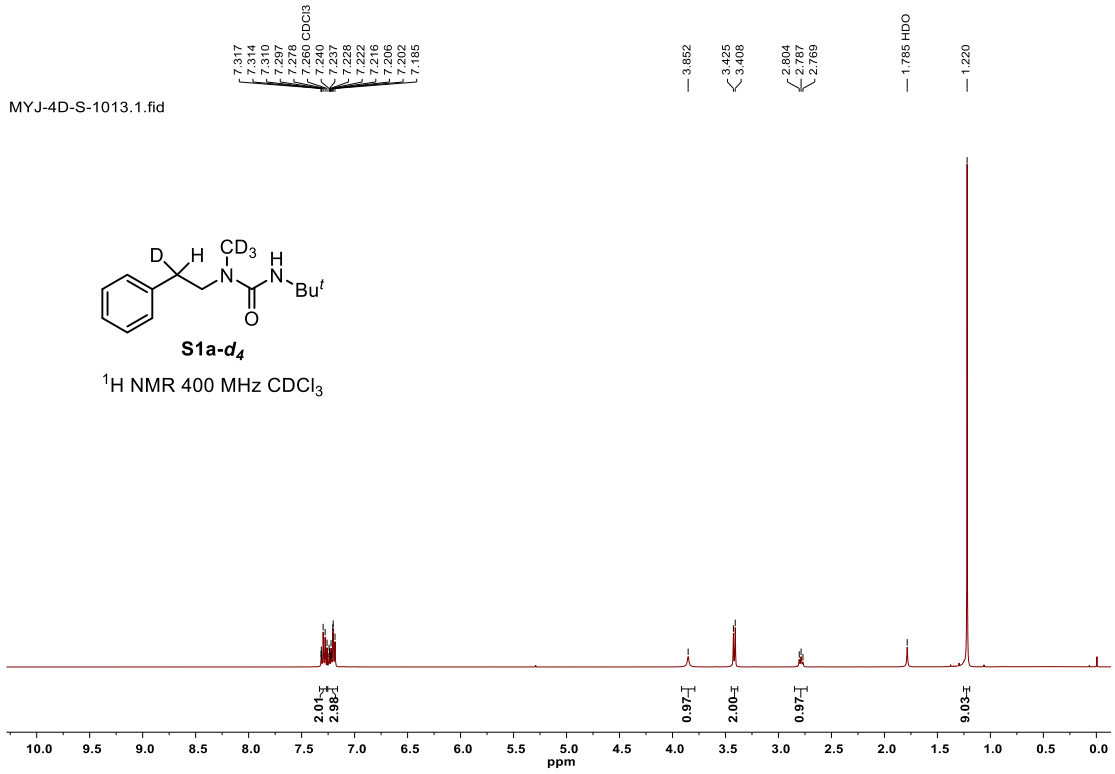

A-MYJ-0312-S-5D.1.fid

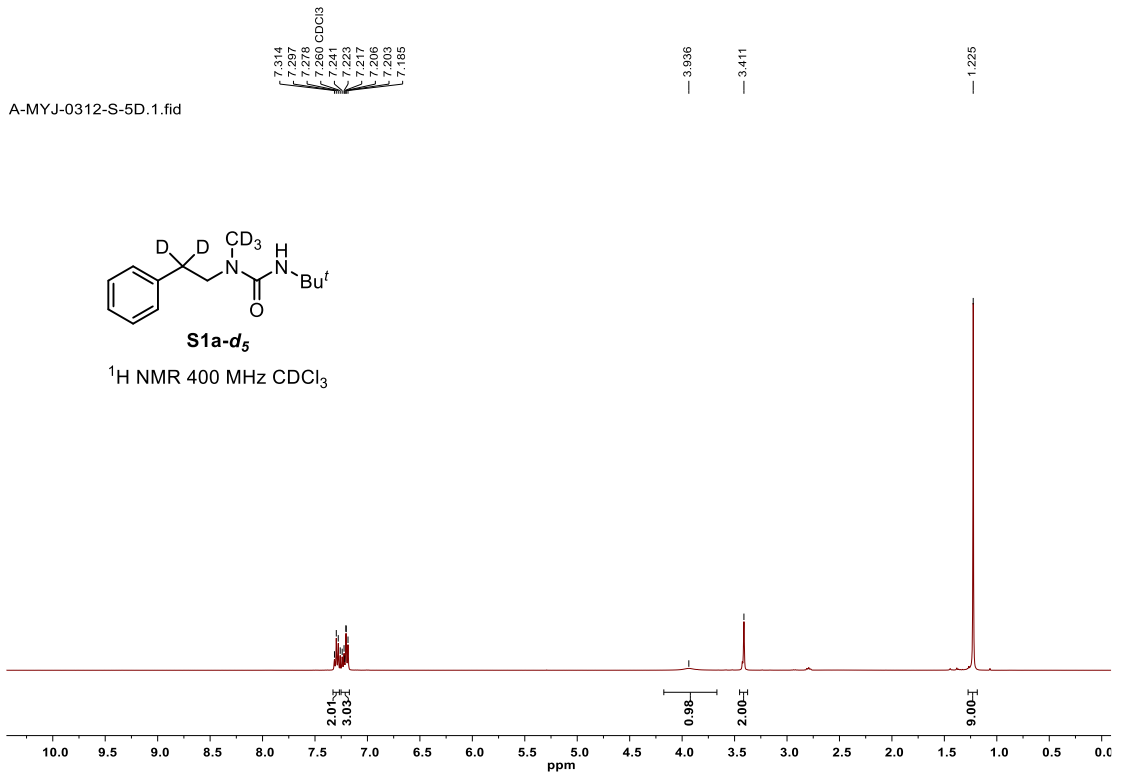

苯位配体32701811.fid  
MYJ-L-pyran CDCl<sub>3</sub> 0328

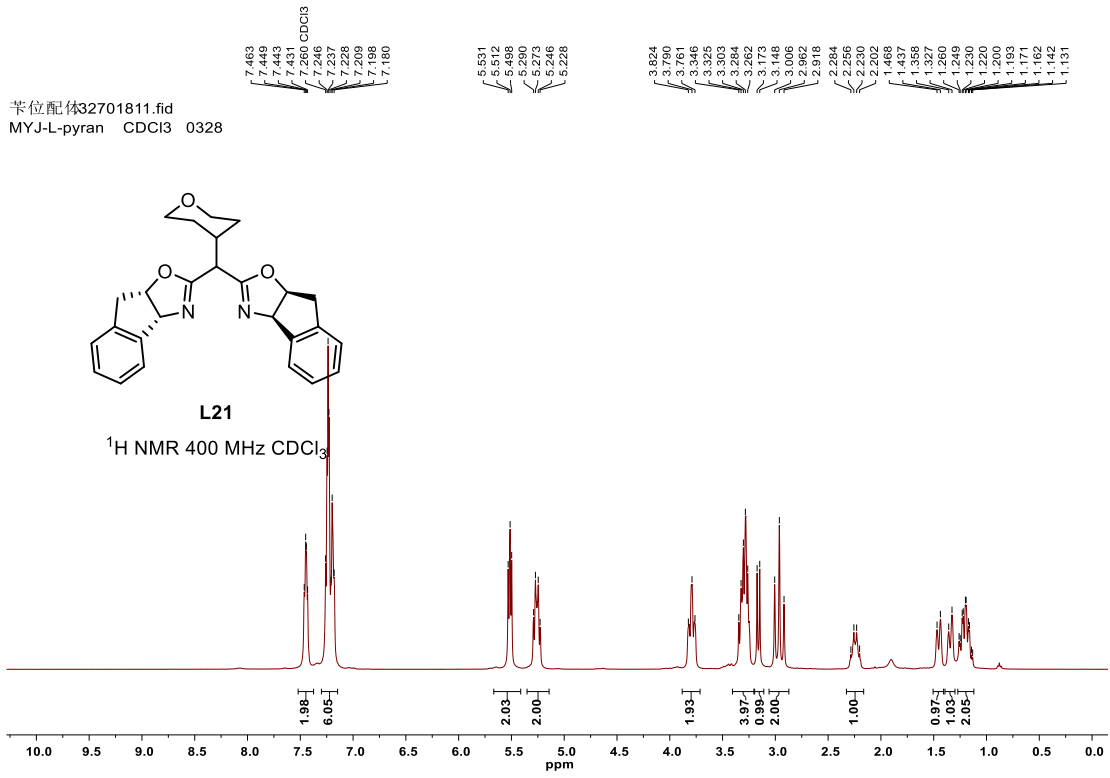

苯位配体32701812.fid  
MYJ-L-pyran CDCl<sub>3</sub> 0328

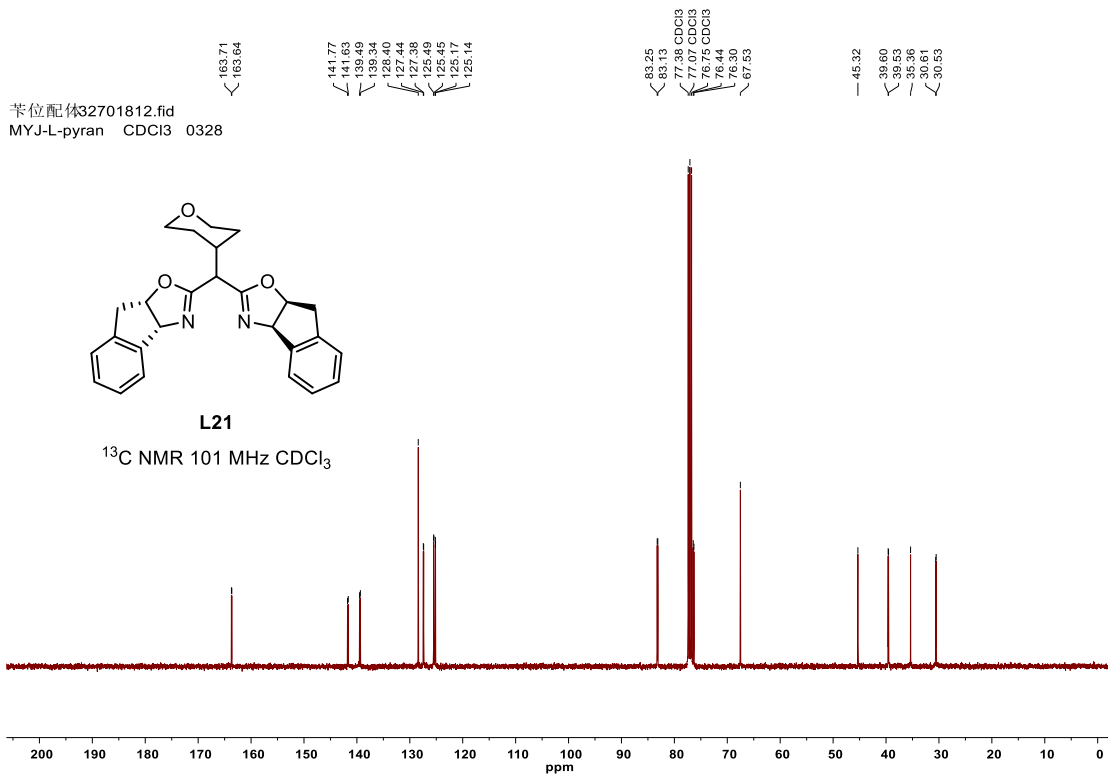

苯位配体32601902.fid  
MYJ-L-Cy-Ph CDCl<sub>3</sub> 0327

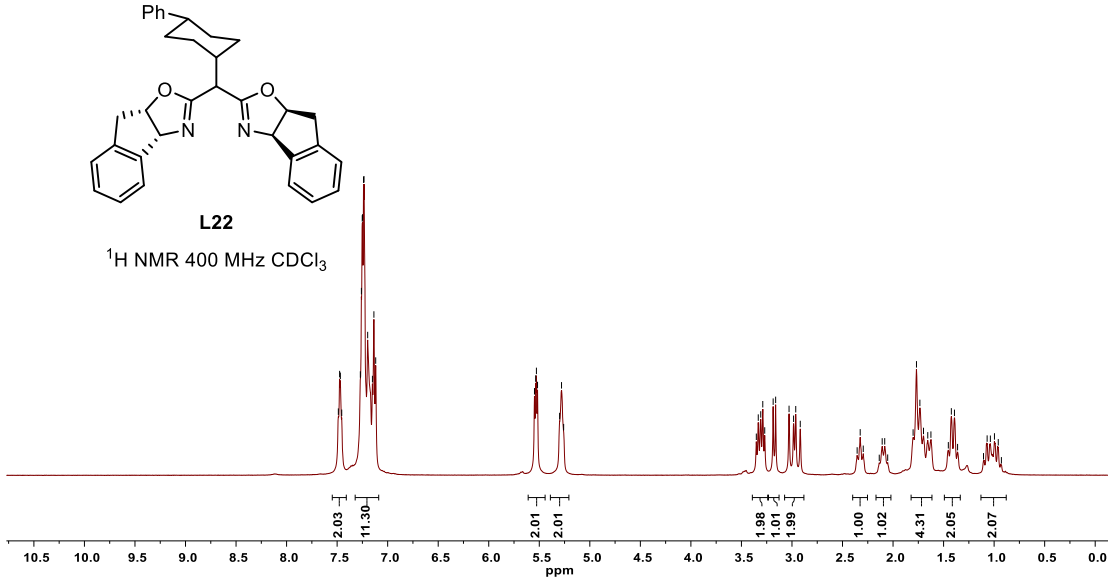

苯位配体32601901.fid  
MYJ-L-Cy-Ph CDCl<sub>3</sub> 0327

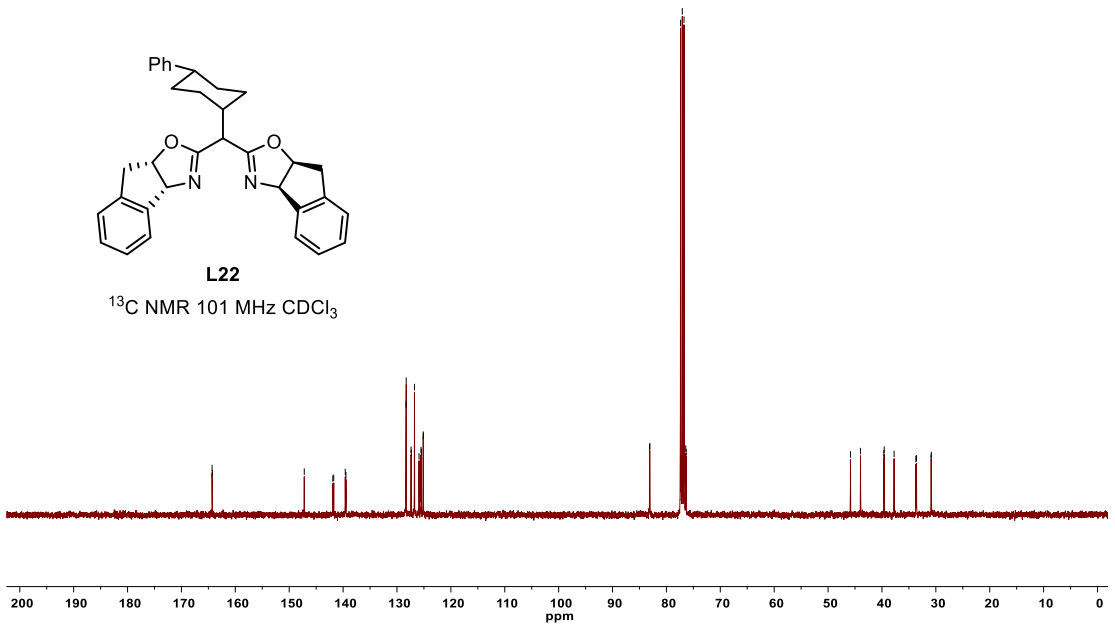



苯位配体32601904.fid  
MYJ-L-Cy-Cy CDCl<sub>3</sub> 0327

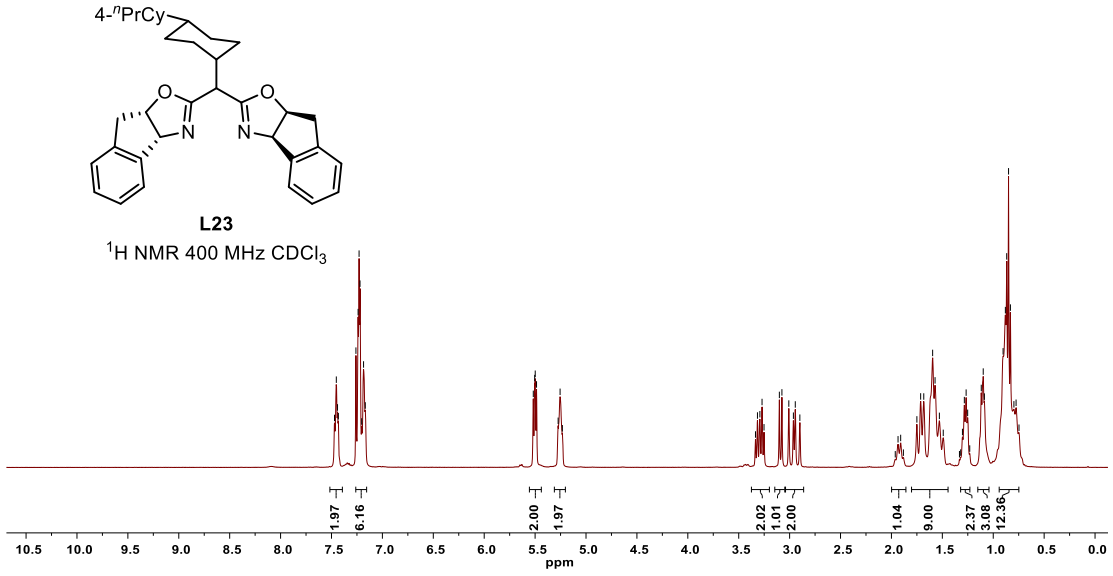

苯位配体32601903.fid  
MYJ-L-Cy-Cy CDCl<sub>3</sub> 0327

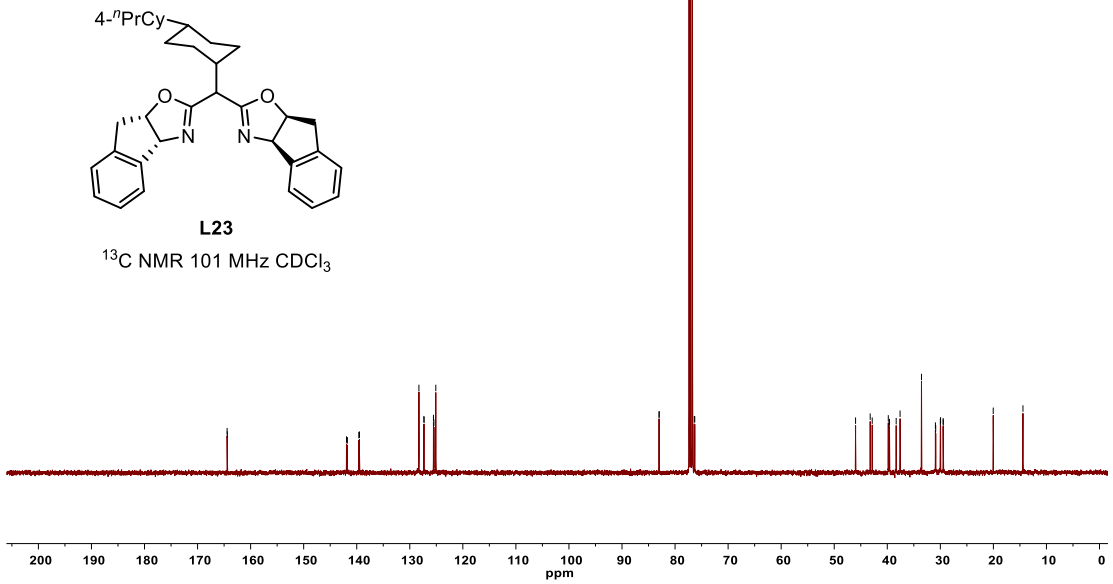

MYJ-0110-L.1.fid

7.475  
7.460  
7.454  
7.454  
7.453  
7.260 CDCl<sub>3</sub>  
7.237  
7.227  
7.219  
7.215  
7.205  
7.191  
7.183  
7.170  
5.529  
5.510  
5.491  
5.291  
5.277  
5.273  
5.270  
5.254  
5.251  
5.237  
5.233  
3.328  
3.309  
3.302  
3.283  
3.284  
3.193  
3.177  
3.042  
2.997  
2.981  
2.936  
1.356  
1.342  
1.307  
1.275  
1.236  
1.212  
1.182  
1.176  
1.168  
1.108  
1.099  
1.084  
1.076  
1.062  
1.042  
1.019  
1.012  
0.989  
0.960  
0.952  
0.944  
0.917  
0.891  
0.861  
0.679

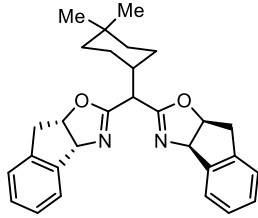

(1*R*,2*S*)-L24

<sup>1</sup>H NMR 400 MHz CDCl<sub>3</sub>

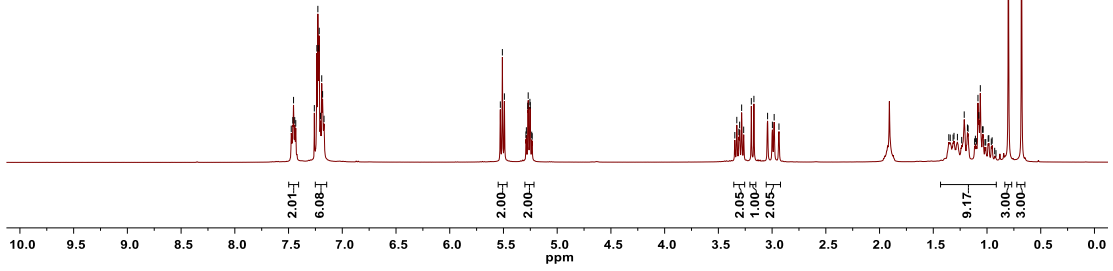

164.43  
164.39

141.93  
141.77  
139.58  
139.45  
128.30  
127.38  
127.32  
125.55  
125.45  
125.10

83.11  
82.99  
77.38 CDCl<sub>3</sub>  
77.31 CDCl<sub>3</sub>  
76.74 CDCl<sub>3</sub>  
76.41  
76.24

45.47  
38.67  
38.59  
38.57  
38.55  
38.01  
32.48  
29.71  
26.30  
26.19  
24.15

MYJ-0110-L.2.fid

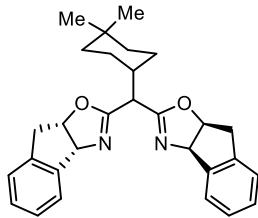

(1*R*,2*S*)-L24

<sup>13</sup>C NMR 101 MHz CDCl<sub>3</sub>

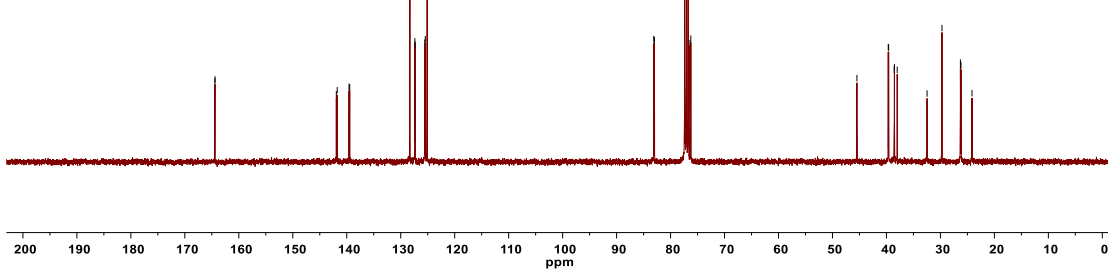

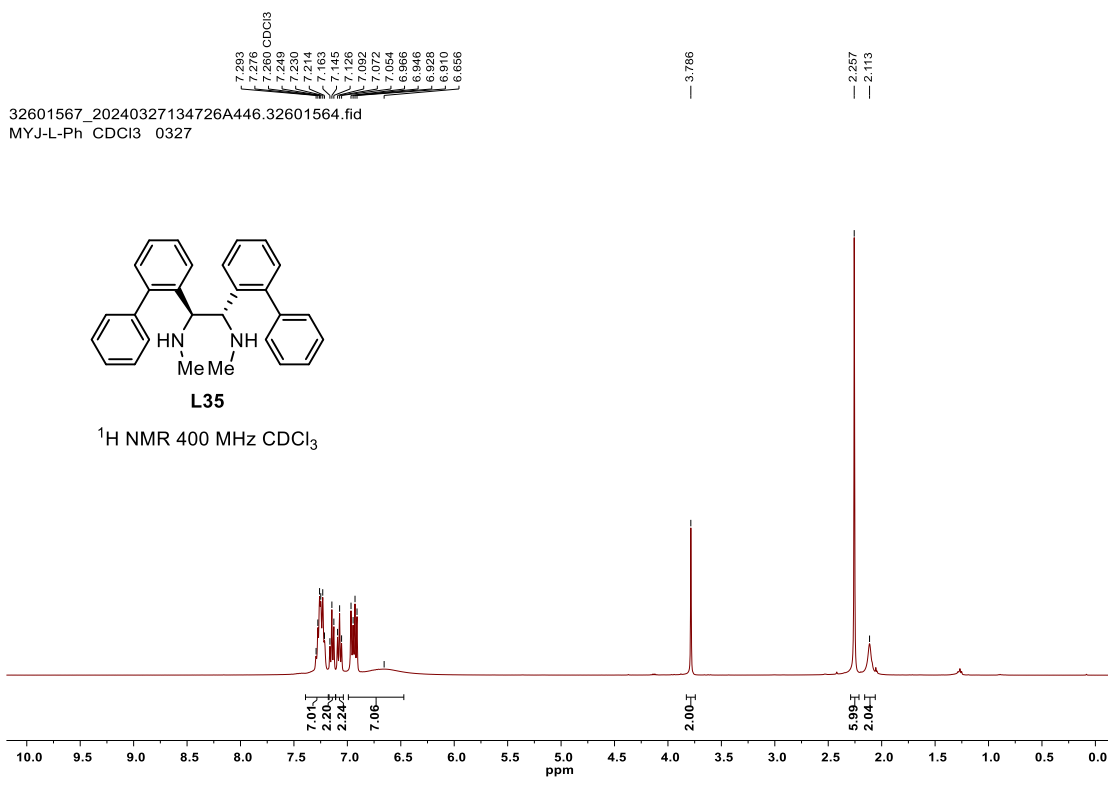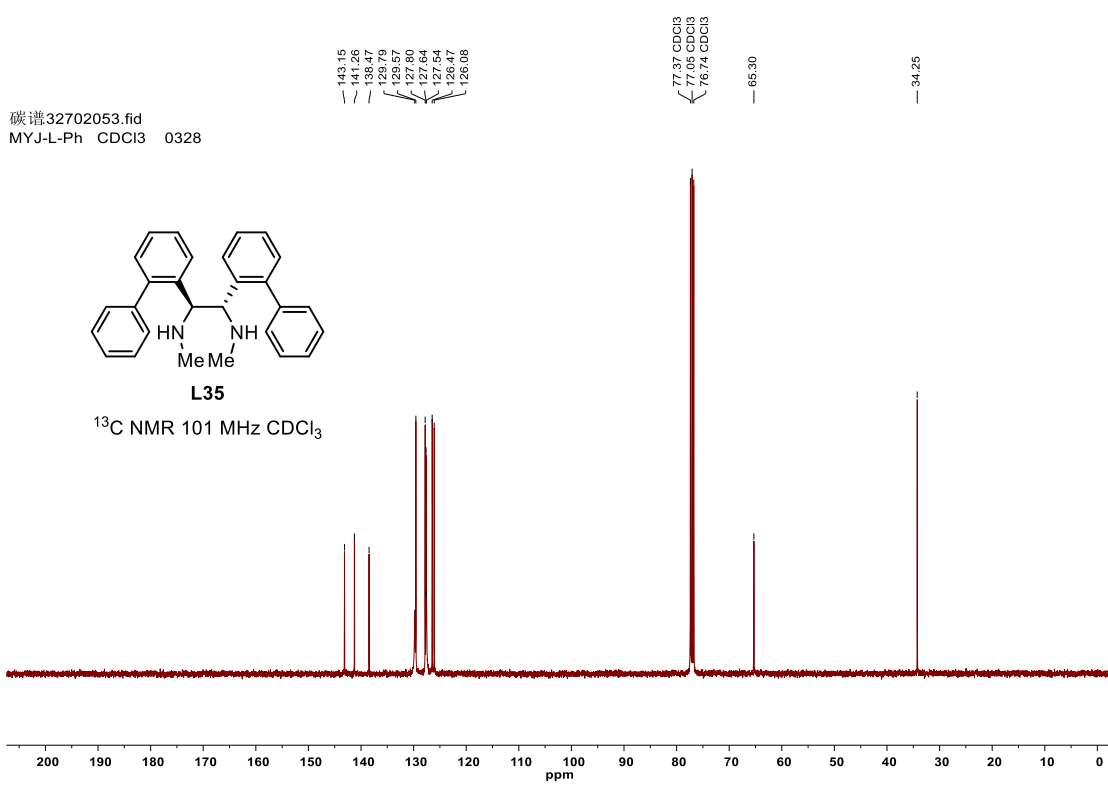

32601567\_20240327134726A446.32601567.fid  
MYJ-L-naphtha CDCl<sub>3</sub> 0327

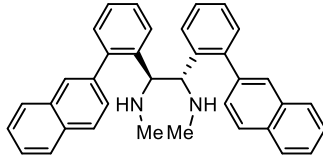

<sup>1</sup>H NMR 400 MHz CDCl<sub>3</sub>

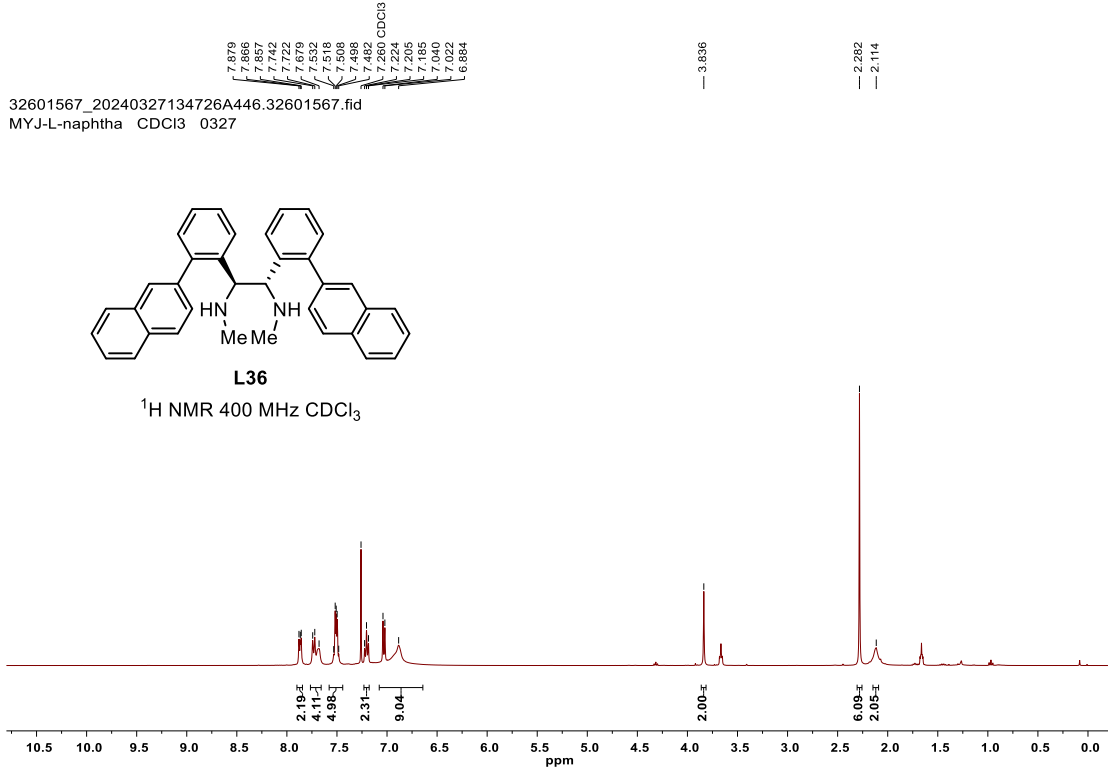

碳谱32702056.fid  
MYJ-L-Naphtha CDCl<sub>3</sub> 0328

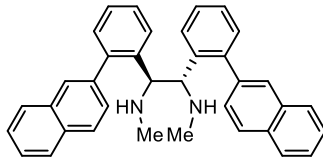

<sup>13</sup>C NMR 101 MHz CDCl<sub>3</sub>

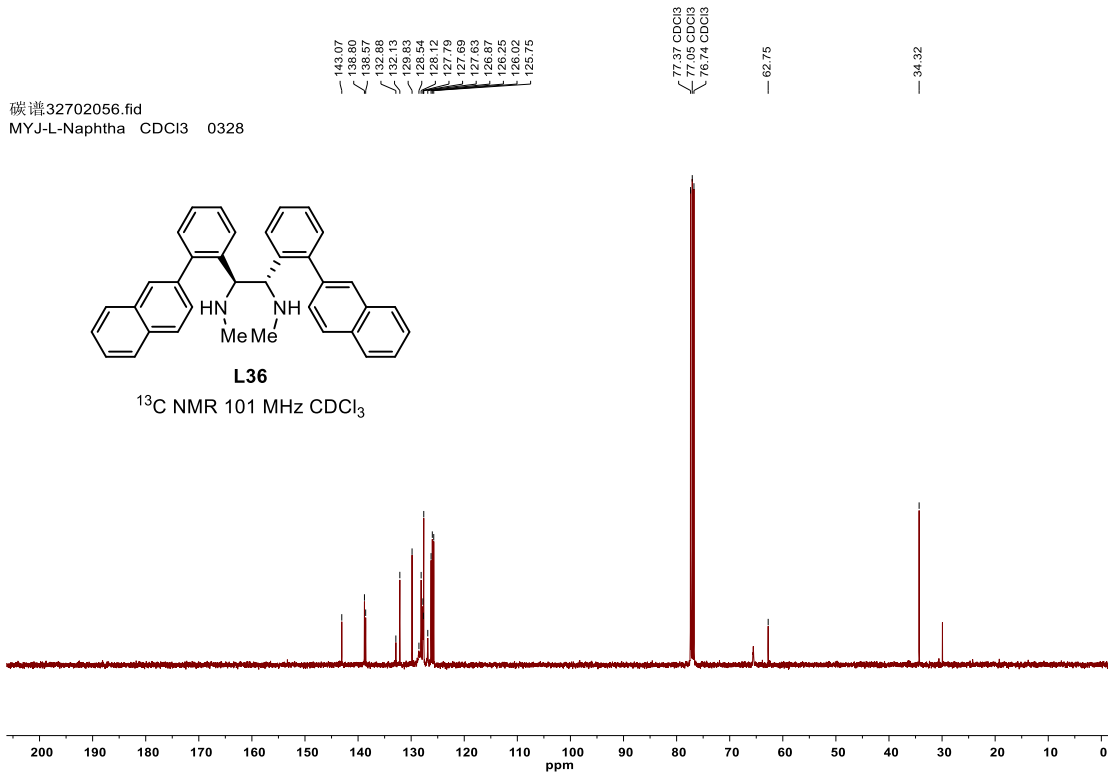

32601567\_20240327134726A446.32601562.fid  
MYJ-L-Bn-ditBu CDCl<sub>3</sub> 0327

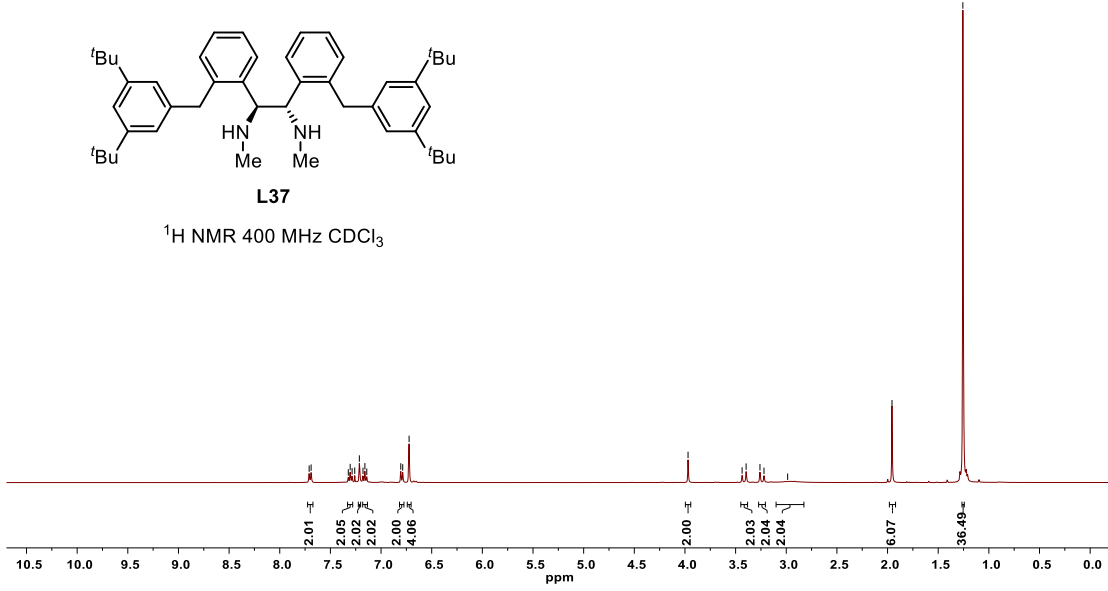

碳谱32702052.fid  
MYJ-L-Bn-ditBu CDCl<sub>3</sub> 0328

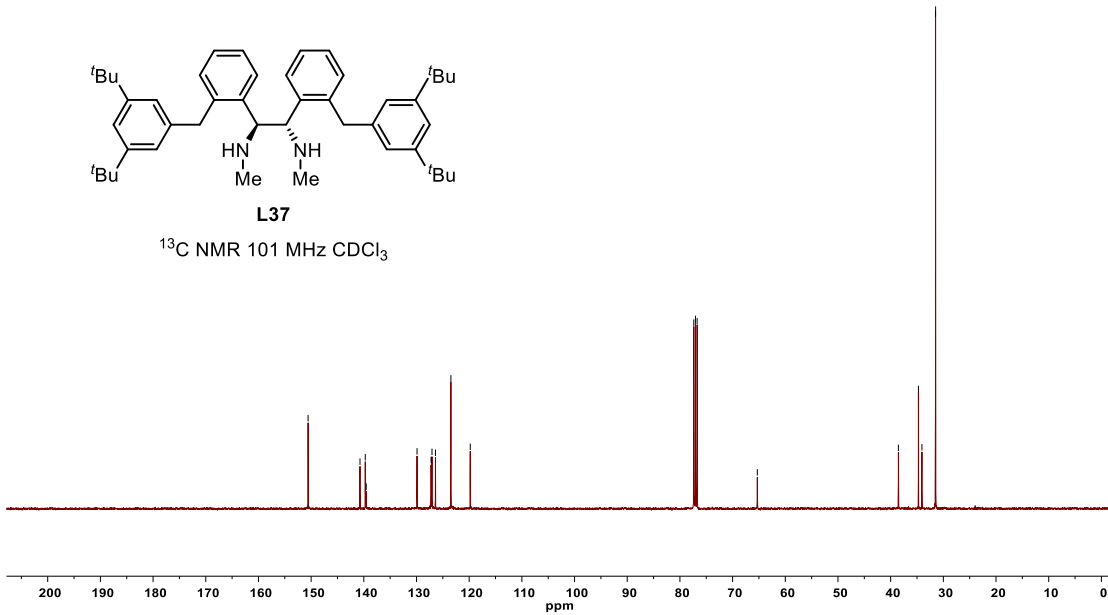

32601567\_20240327134726A446.32601565.fid  
MYJ-L-ditBuPh CDCl<sub>3</sub> 0327

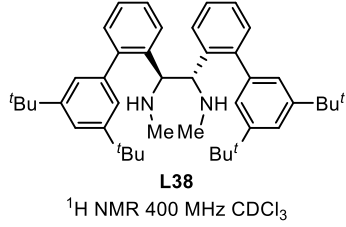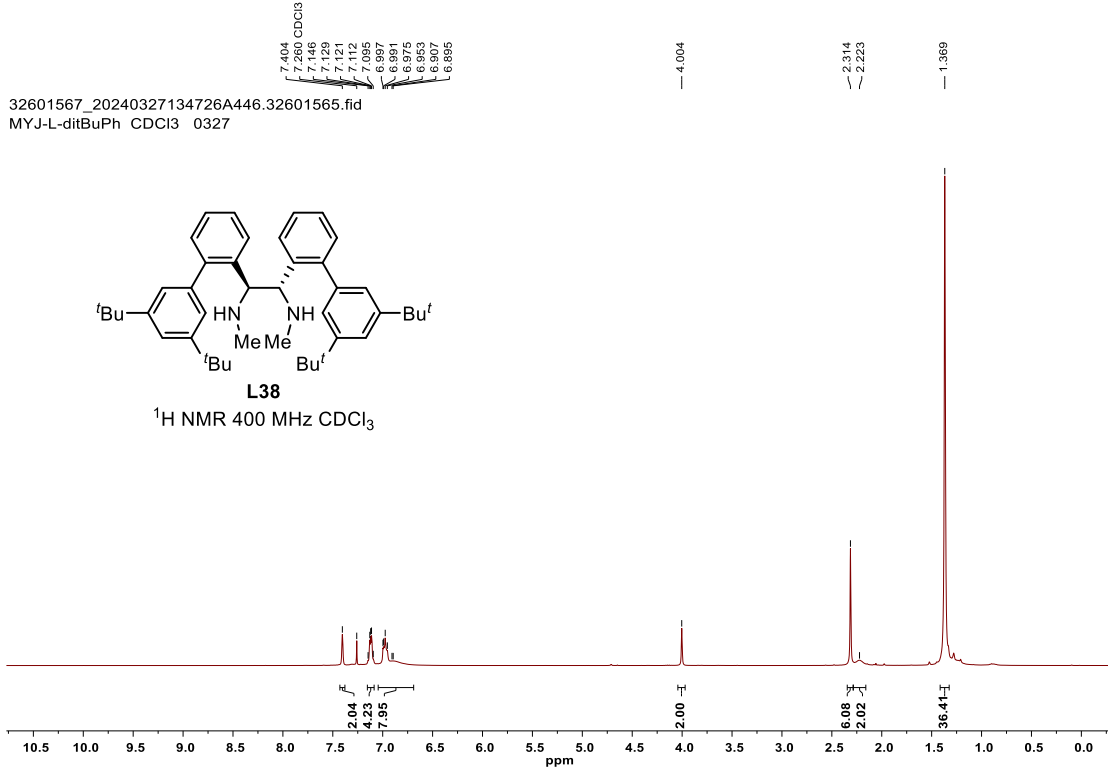

碳谱32702054.fid  
MYJ-L-ditBuPh CDCl<sub>3</sub> 0328

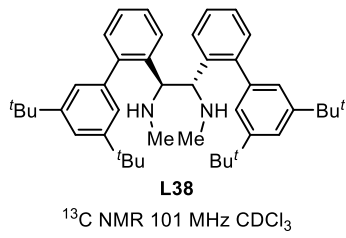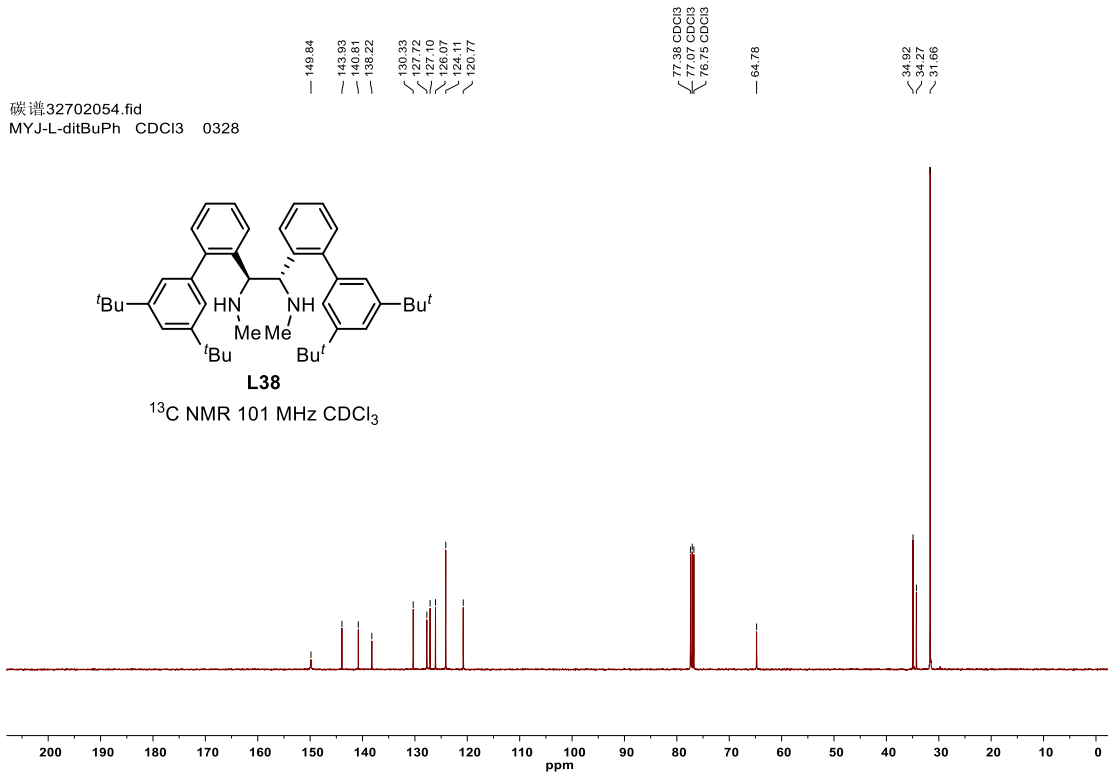

32601567\_20240327134726A446.32601566.fid  
MYJ-L-TES CDCl3 0327

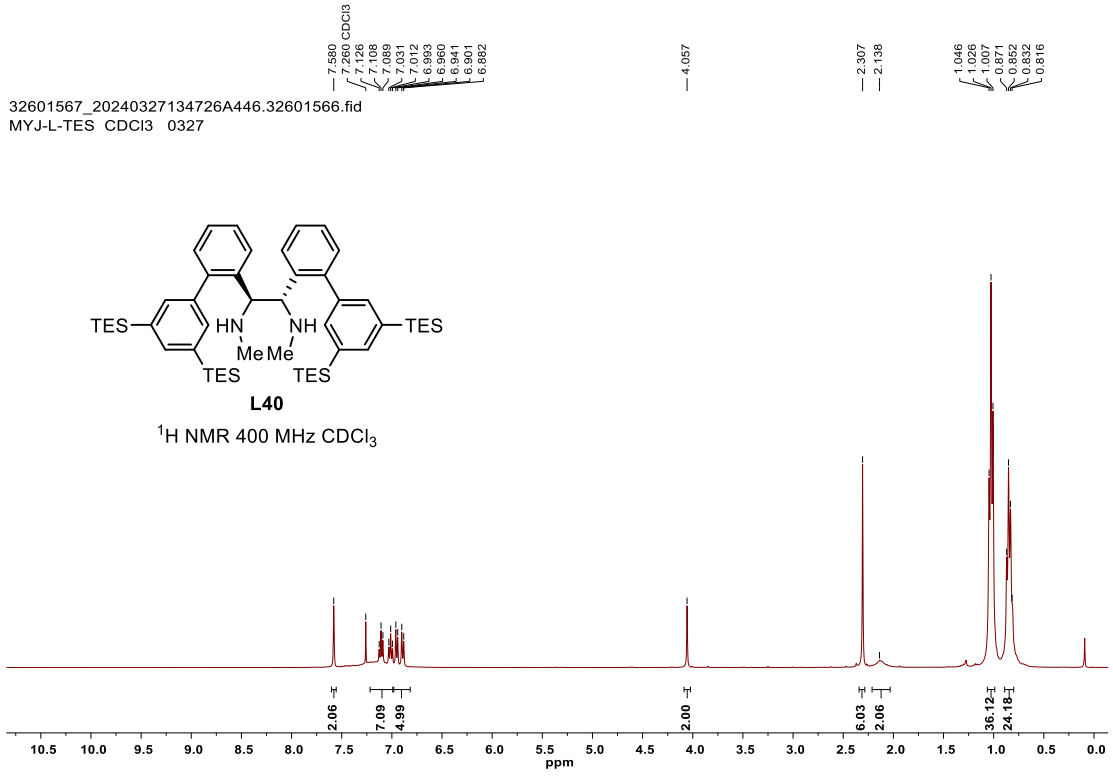

碳谱32702055.fid  
MYJ-L-TES CDCl3 0328

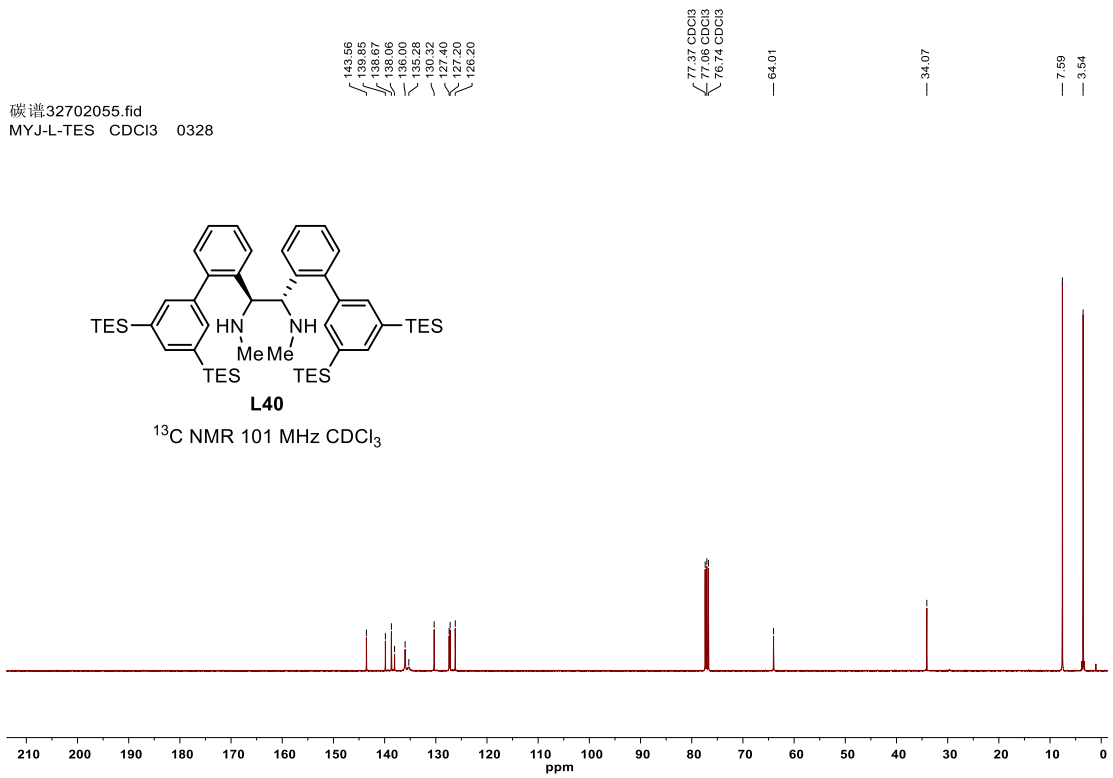

32601567\_20240327134726A446.32601561.fid  
MYJ-L-TBS CDCl3 0327

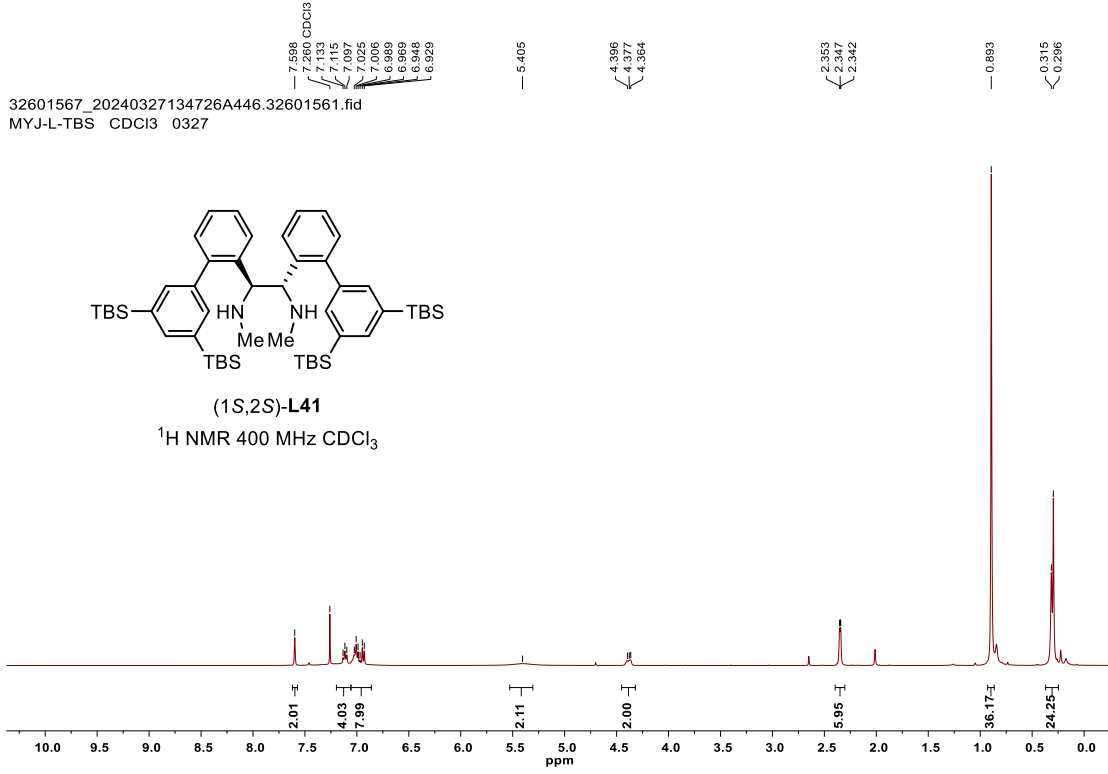

碳谱32702051.fid  
MYJ-L-TBS CDCl3 0328

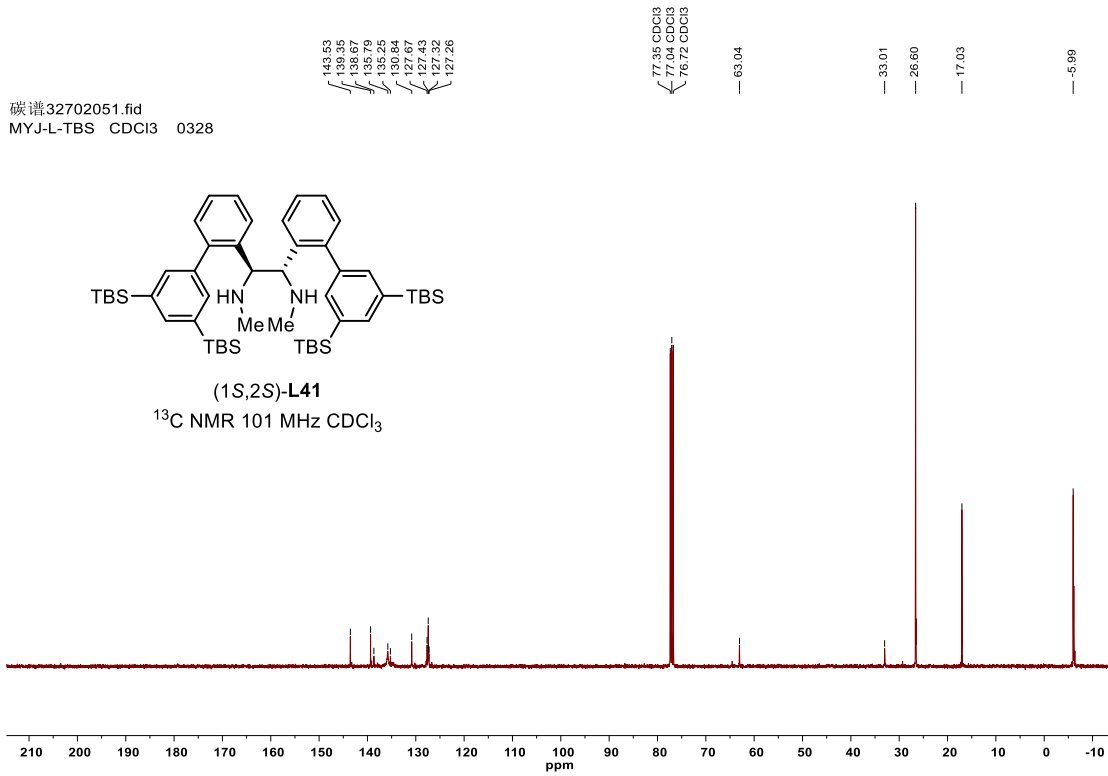



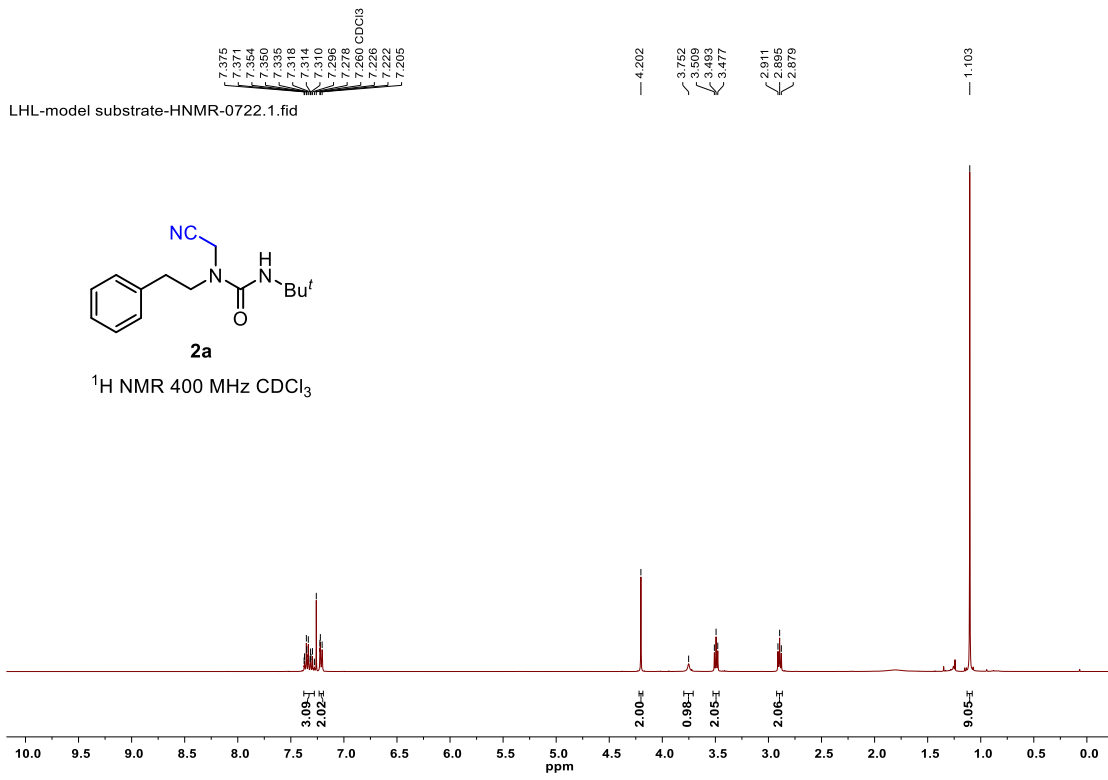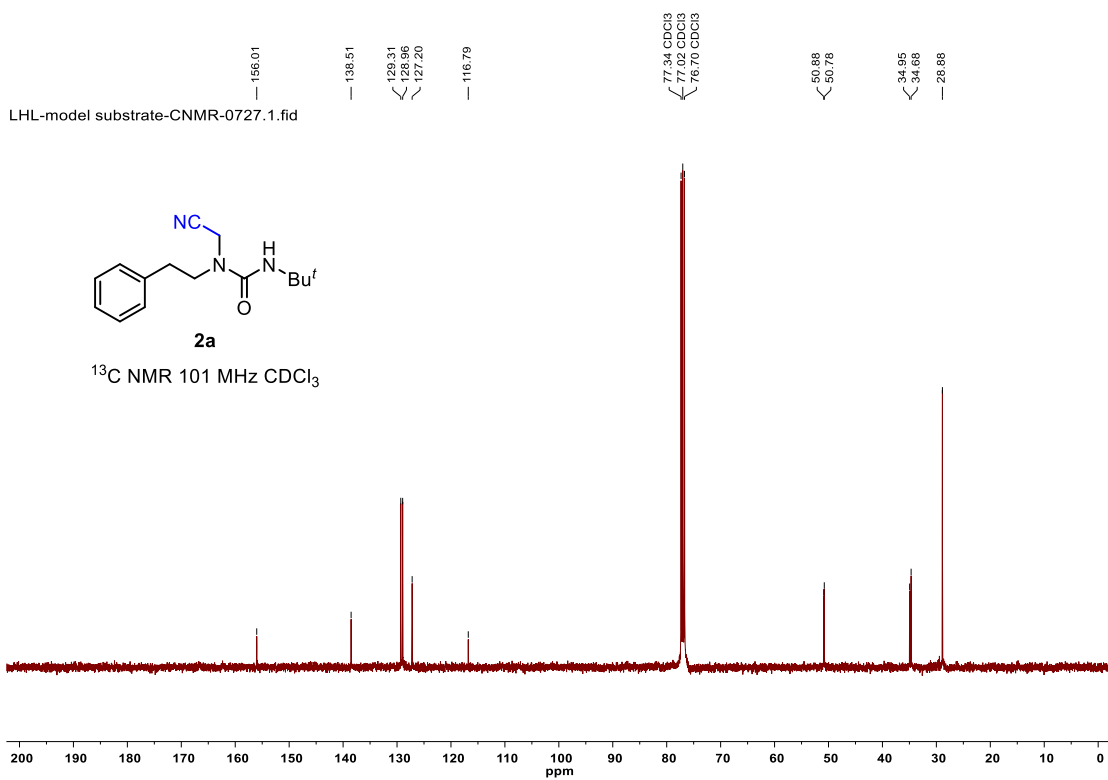

LHL-para-Me-HNMR-2.1.fid

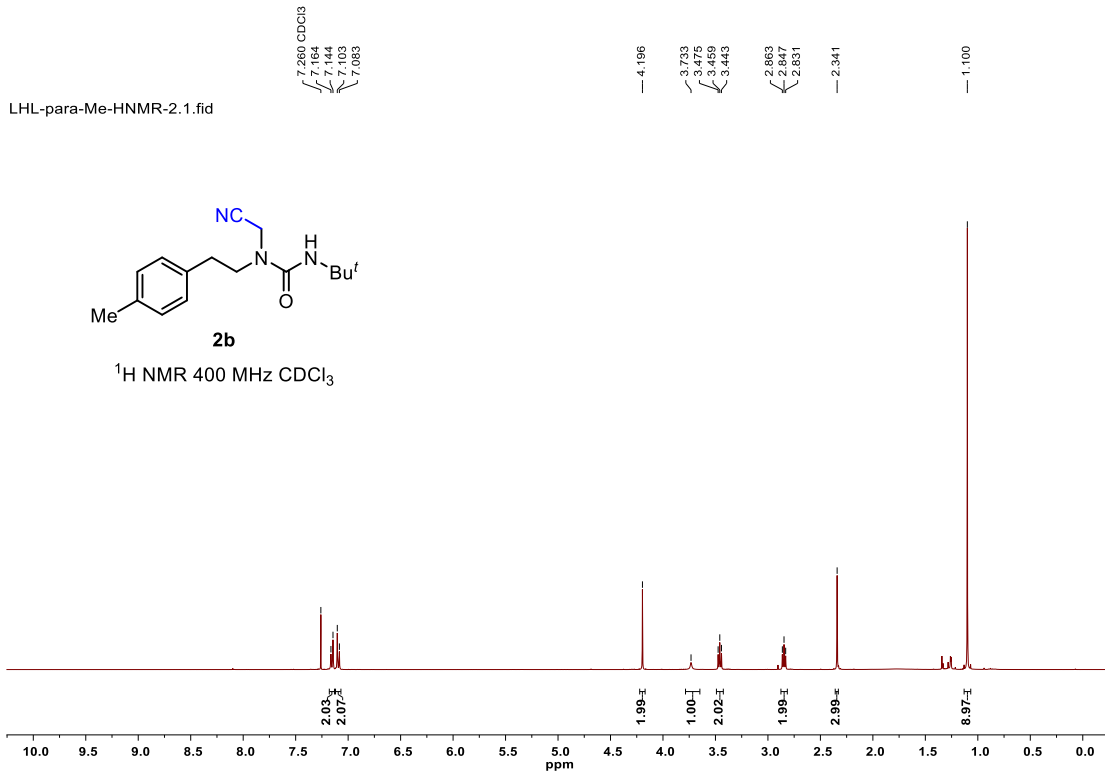

LHL-para-Me-CNMR-2.1.fid  
13c

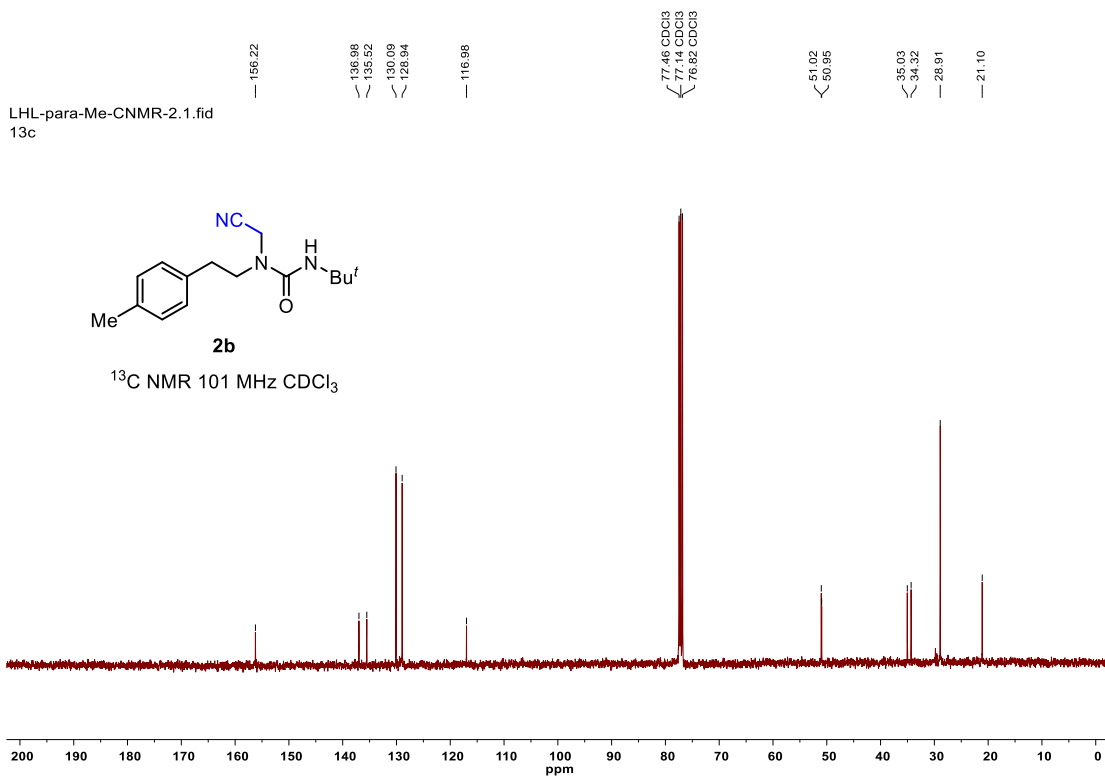

LHL-0323-p-Ph.1.fid

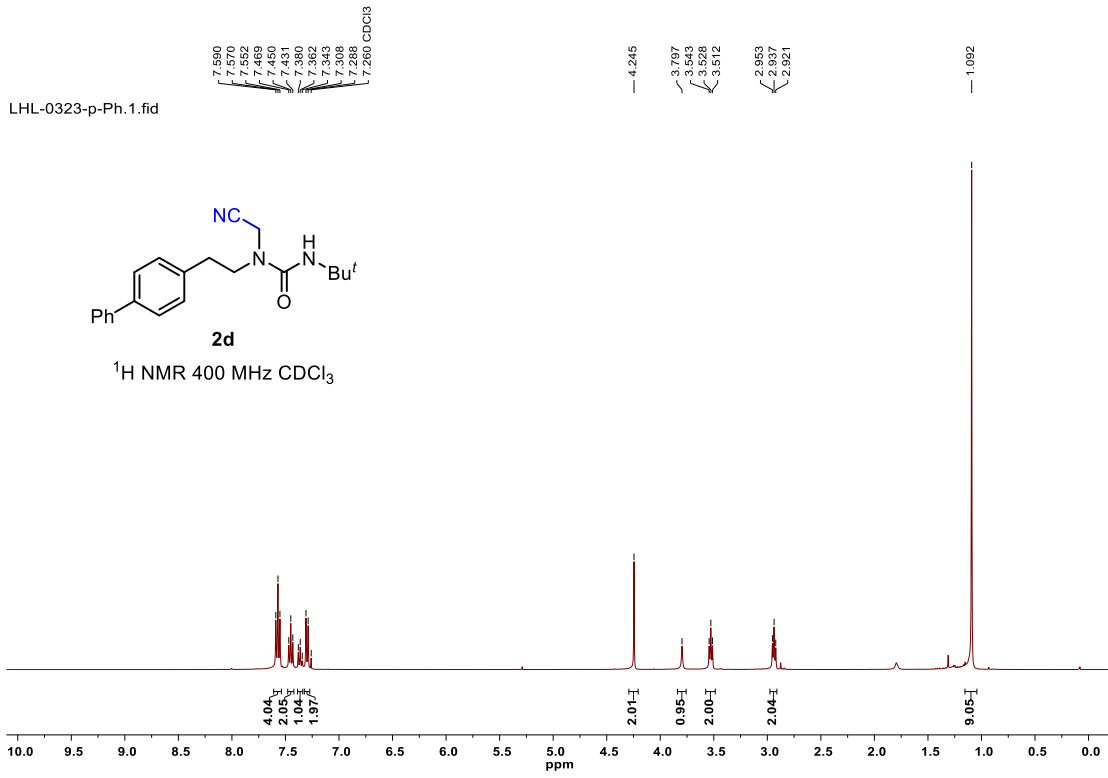

LHL-p-Ph-CNMR.1.fid

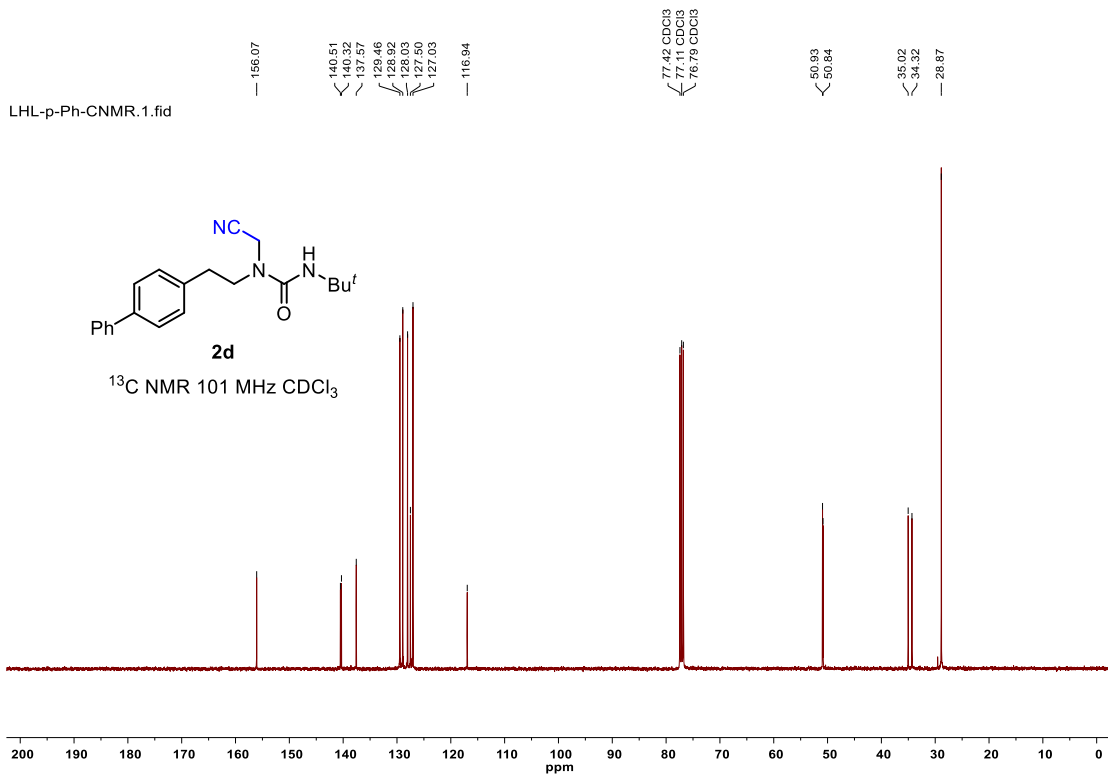

LHL-para-F-HNMR-7.1.fid

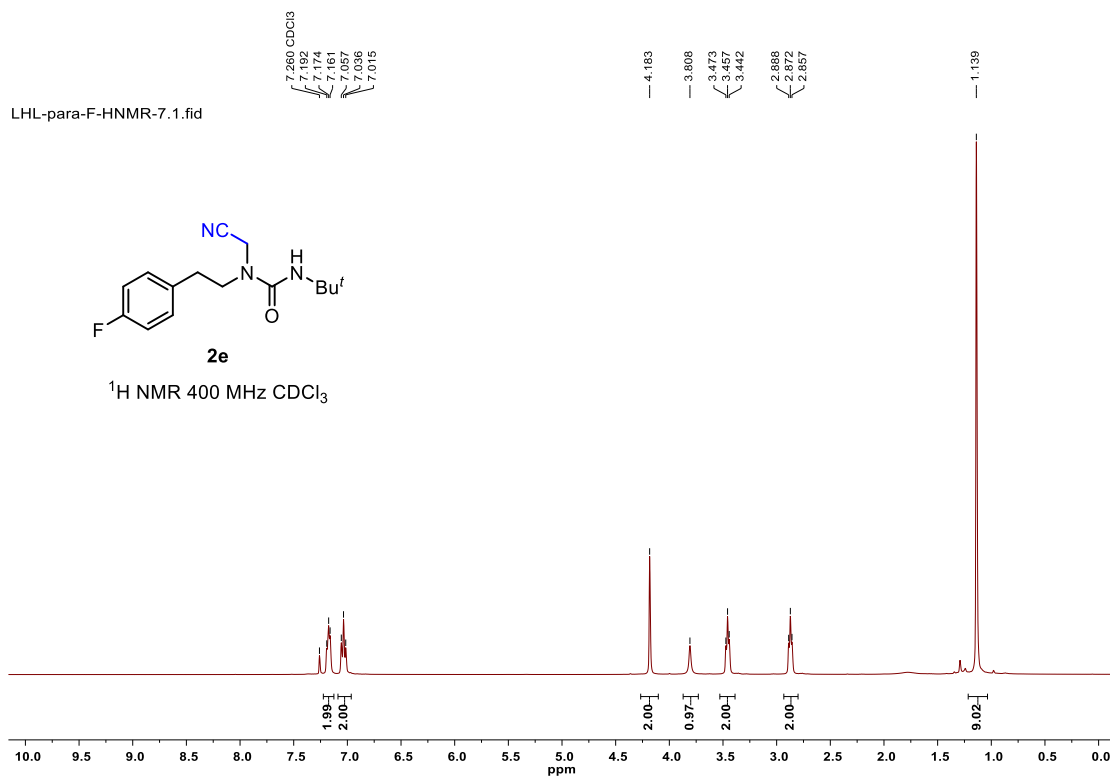

LHL-para-F-CNMR-7.1.fid

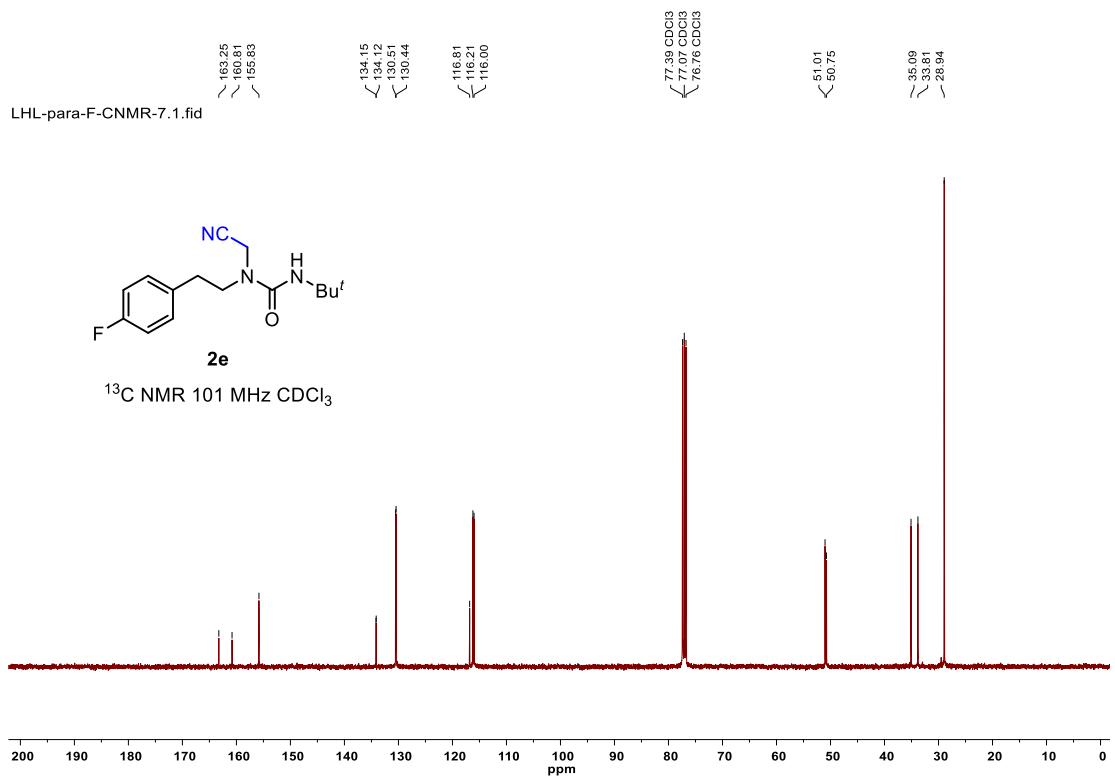

h60nihcyQE6Jdv+53pA6uQ.90800221.fid  
MYJ-0909-alpha-p-F CDCl3 0910

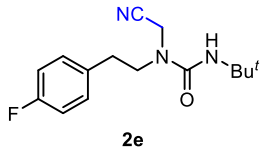

<sup>19</sup>F NMR 376 MHz CDCl<sub>3</sub>

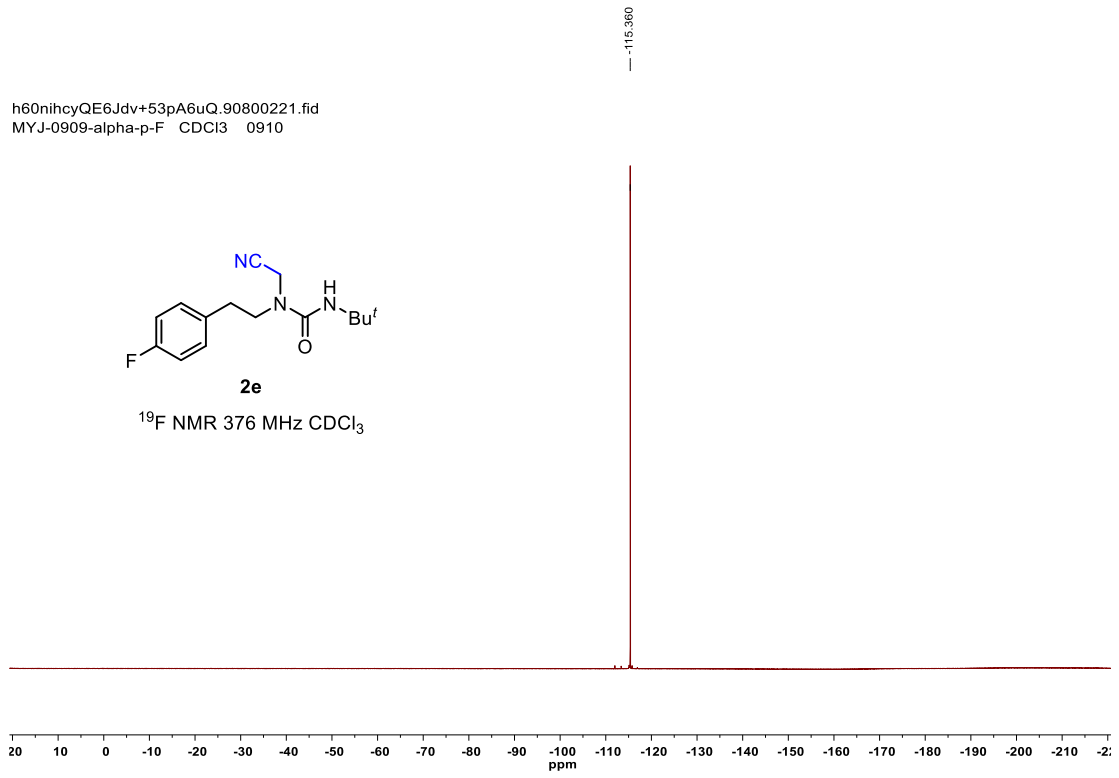

LHL-para-Cl-NMR-15.1.fid

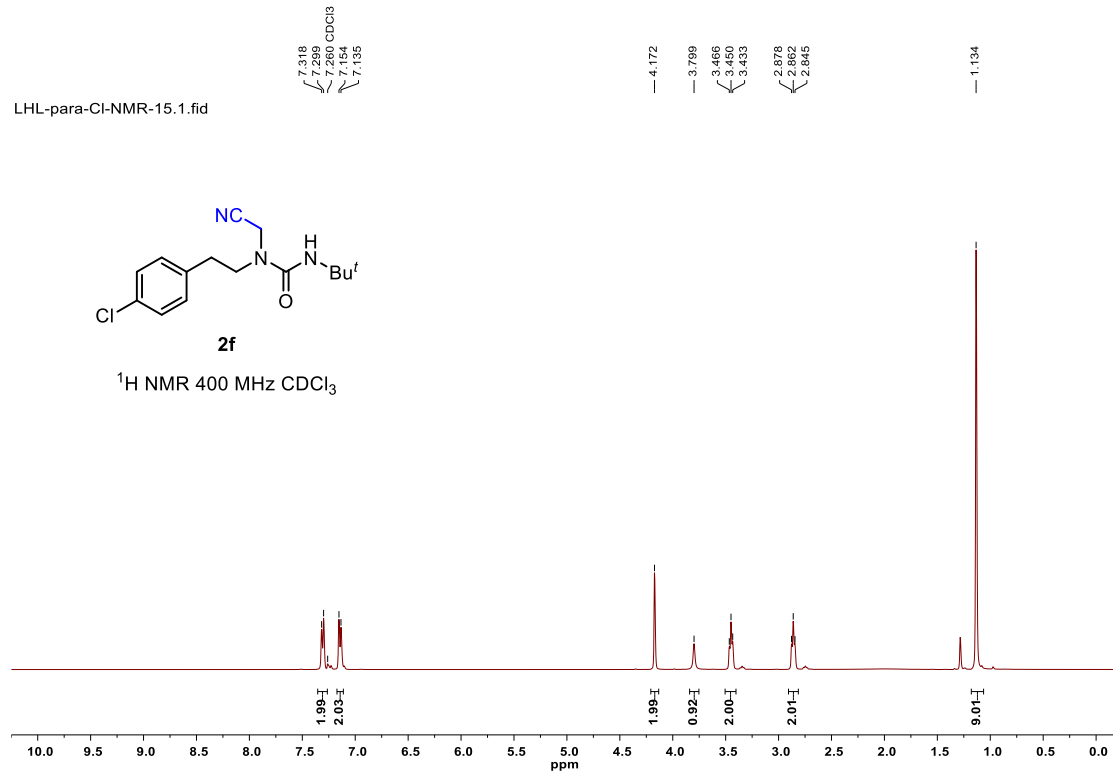

LHL-para-Cl-NMR-15.2.fid

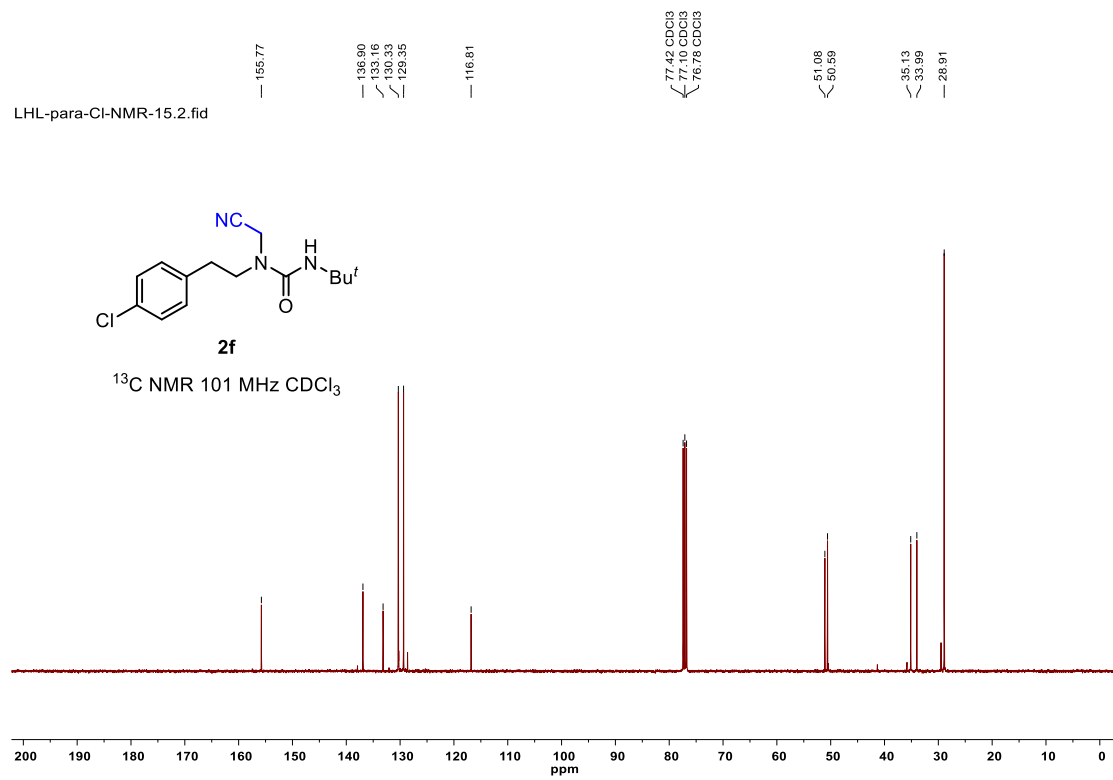

LHL-0331-p-Br-hnmr.1.fid

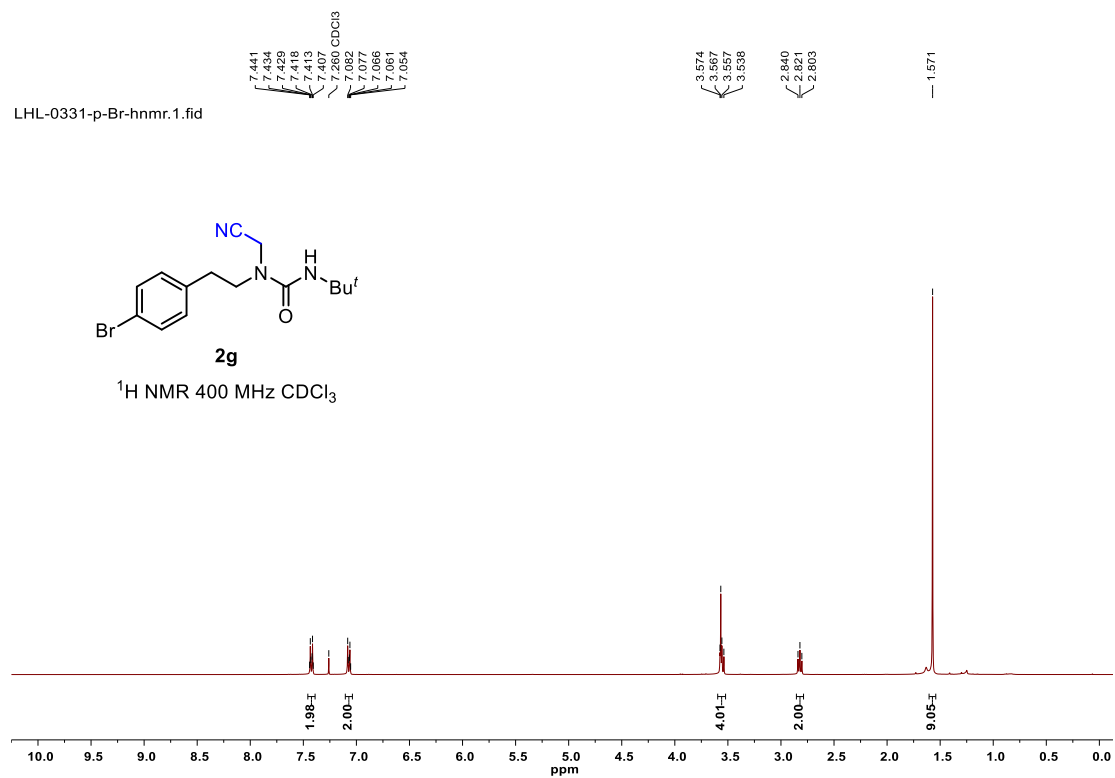

LHL-p-Br-CNMR.1.fid

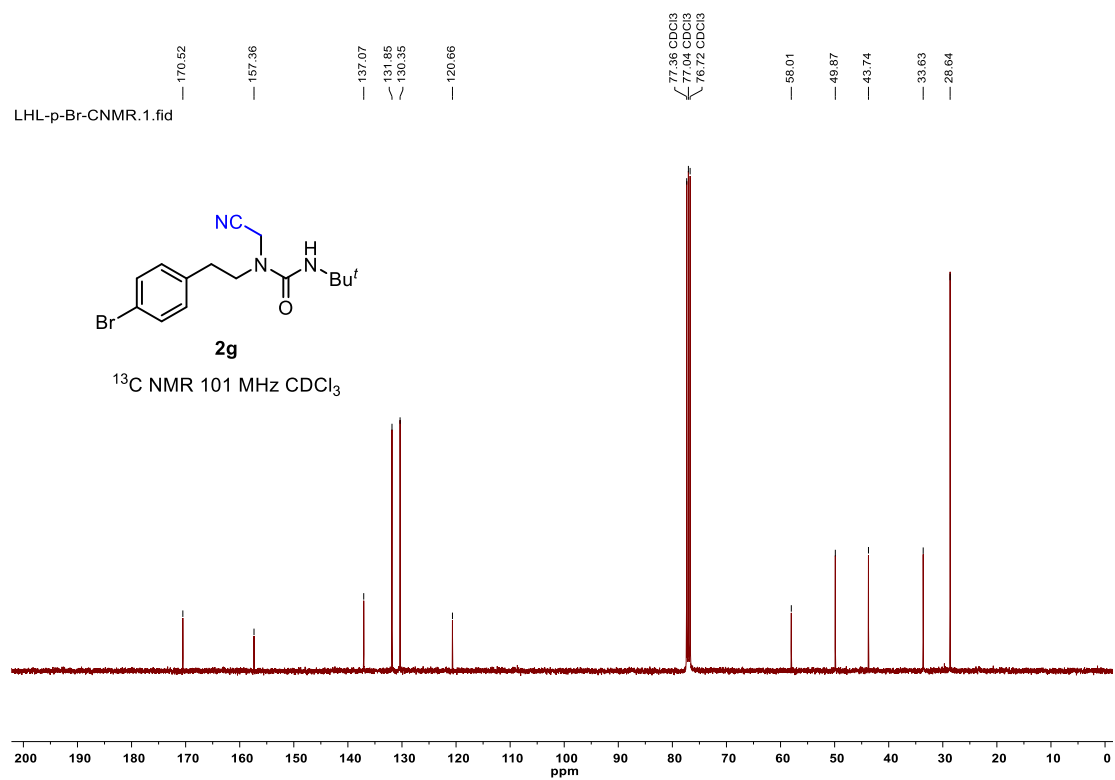

LHL-para-CF3-HNMR-9.1.fid

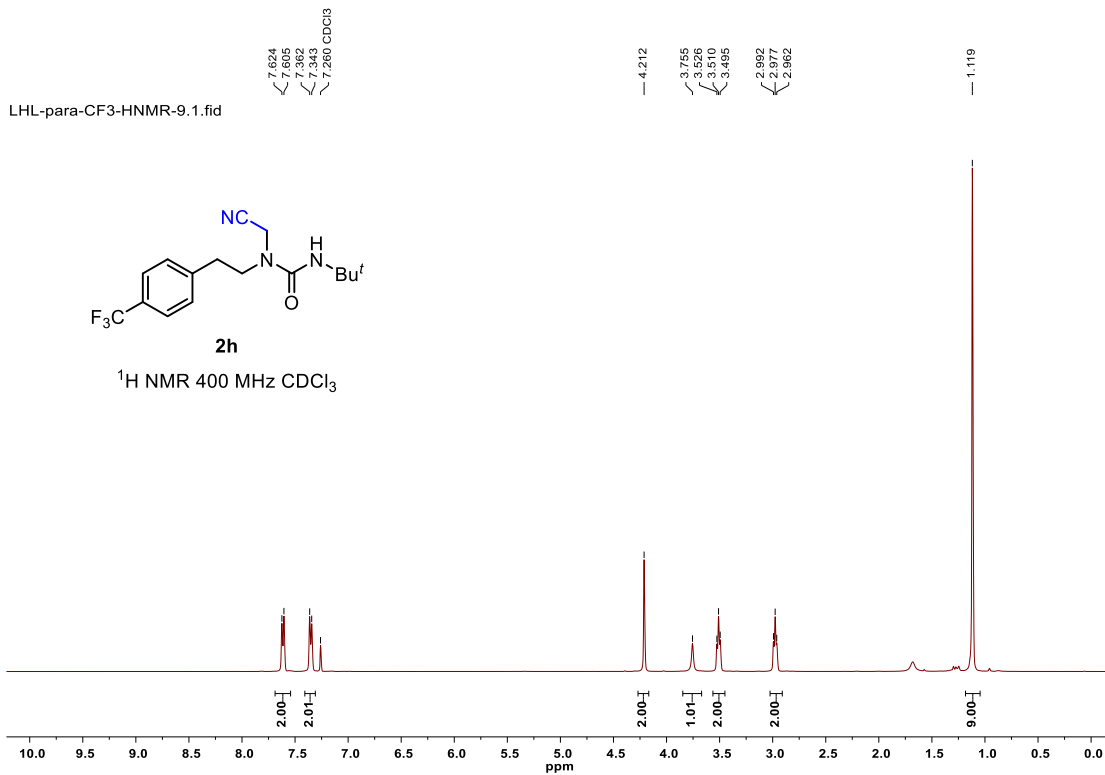

LHL-para-CF3-CNMR-9.1.fid

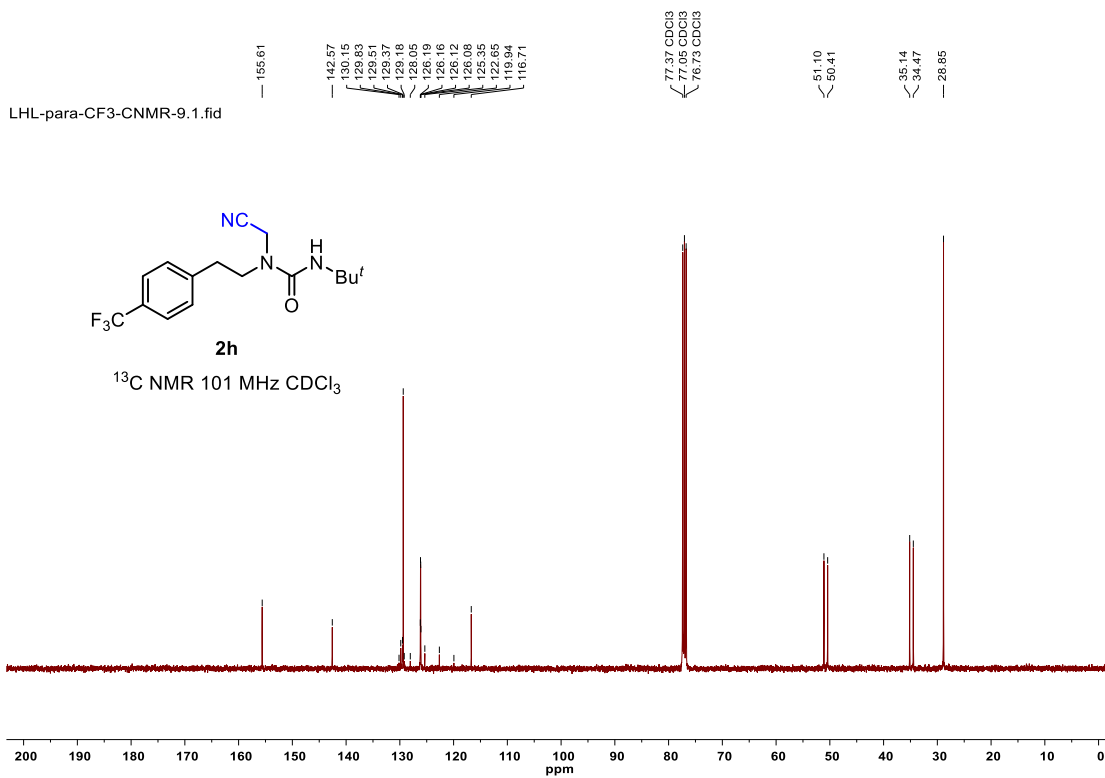



— 62.812

h60nihcyQE6Jdv+53pA6uQ.90800223.fid  
MYJ-0909-alpha-p-OCF3 CDCl3 0910

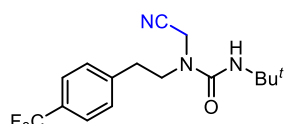

**2h**

<sup>19</sup>F NMR 376 MHz CDCl<sub>3</sub>

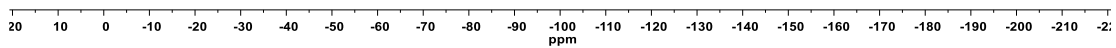

LHL-para-OCF3-HNMR-10.1.fid

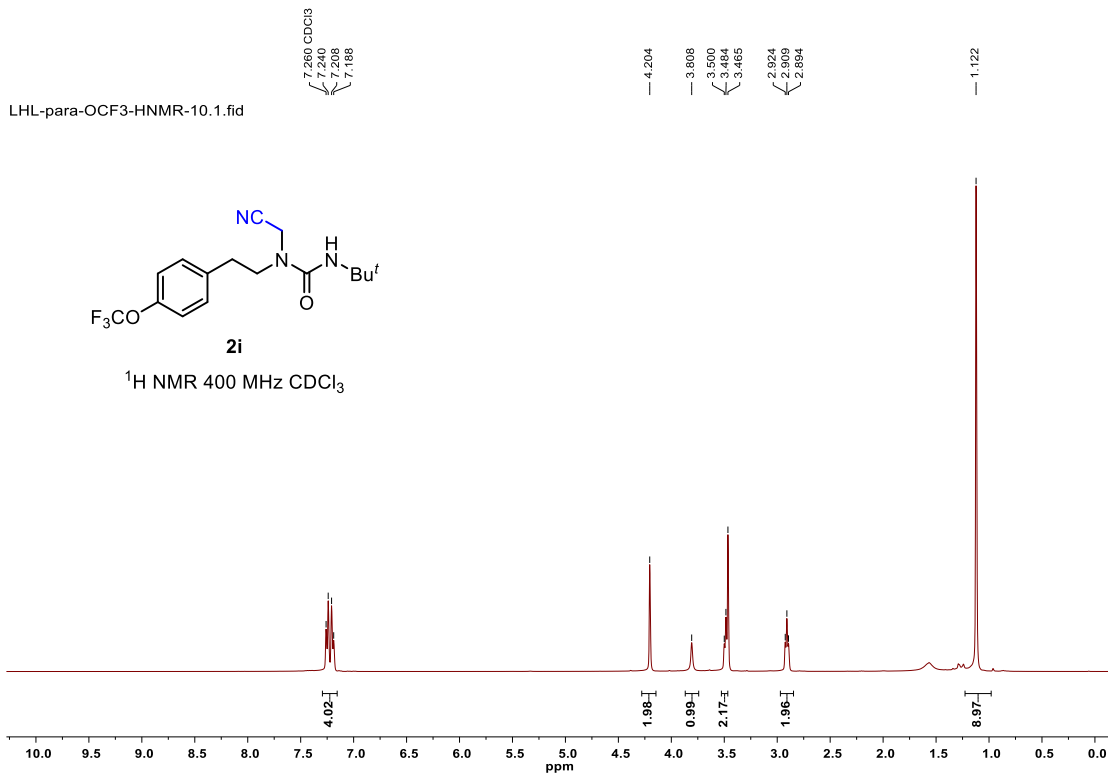

LHL-para-OCF3-CNMR-10.1.fid

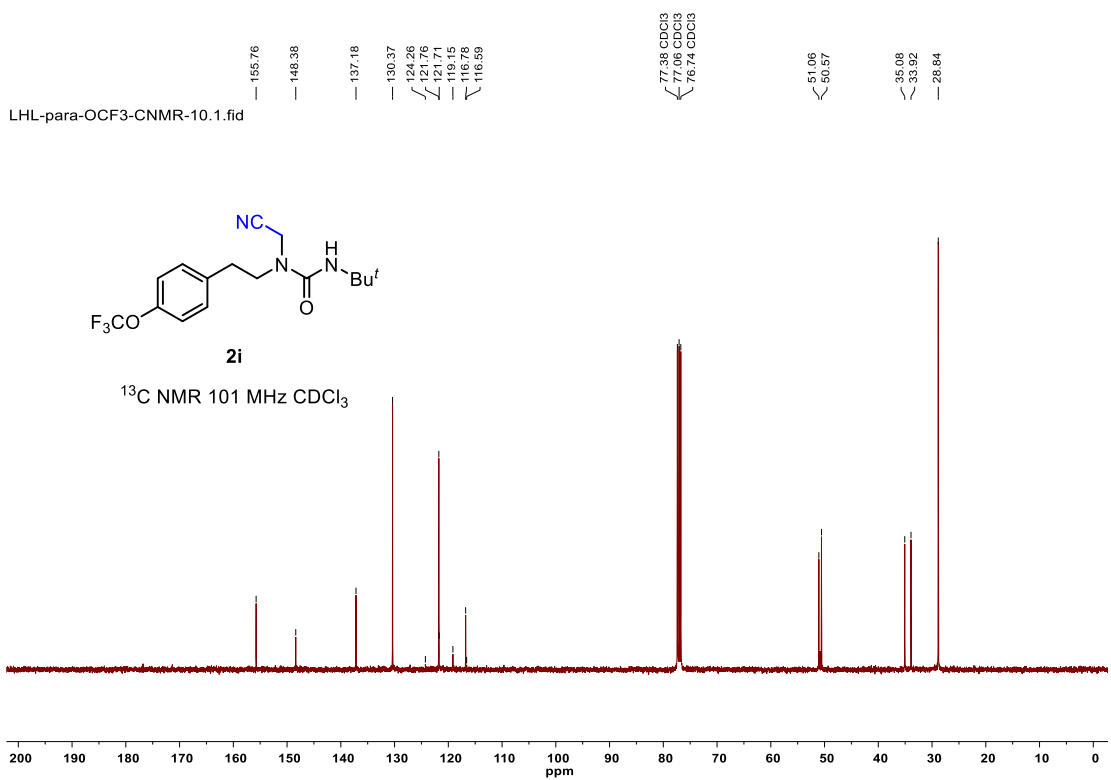

-57.884

h60nihcyQE6Jdv+53pA6uQ.90800222.fid  
MYJ-0909-alpha-p-CF3 CDCl3 0910

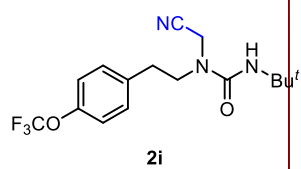

<sup>19</sup>F NMR 376 MHz CDCl<sub>3</sub>



LHL-meta-F-HNMR-6.1.fid

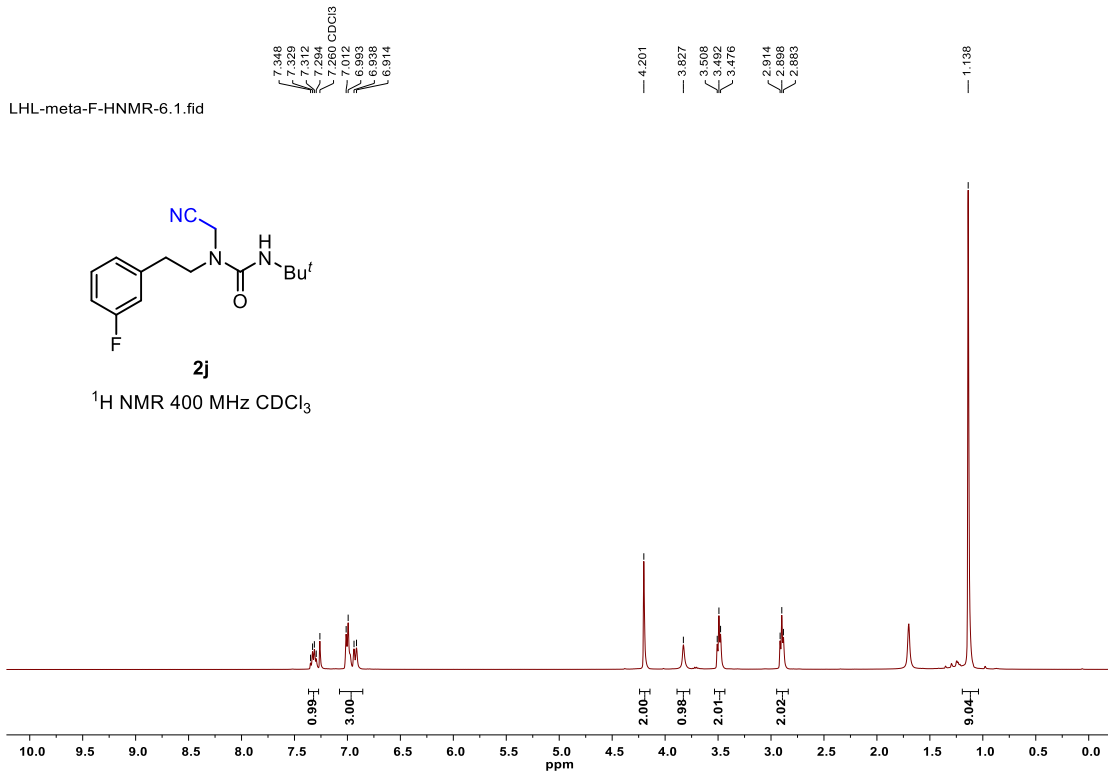

LHL-meta-F-CNMR-6.1.fid

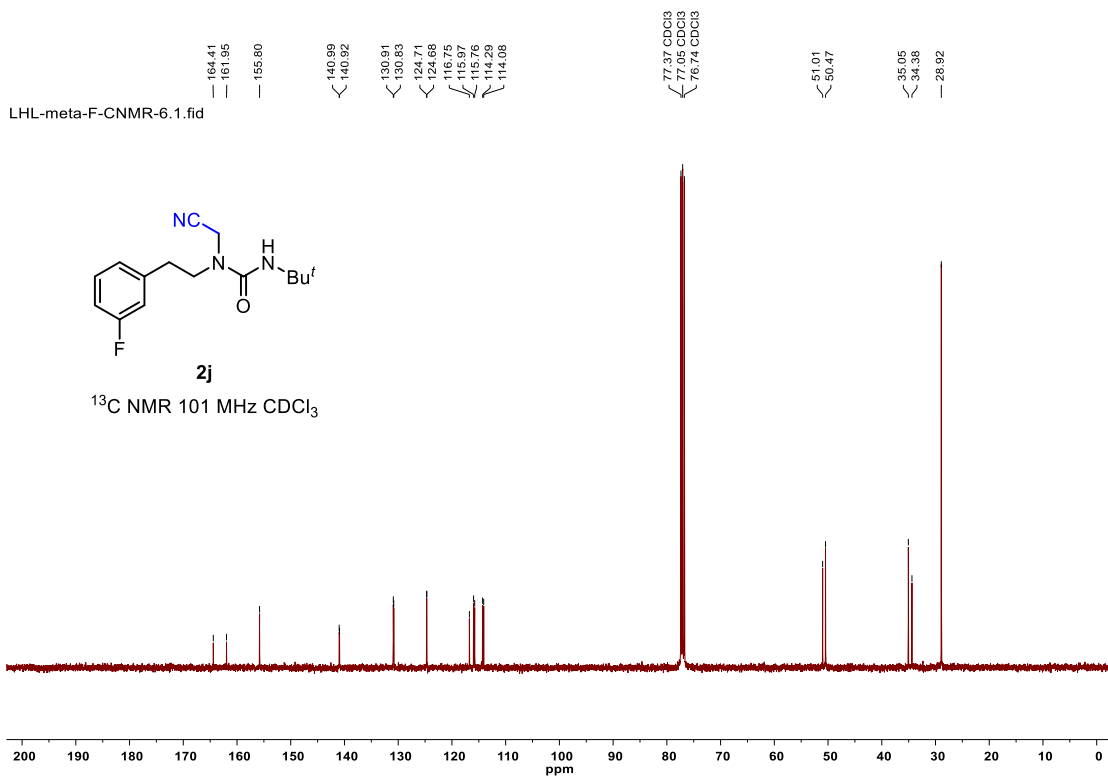

h60nihcyQE6Jdv+53pA6uQ.90800226.fid  
MYJ-0909-alpha-o-F CDCl3 0910

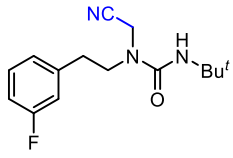

<sup>19</sup>F NMR 376 MHz CDCl<sub>3</sub>

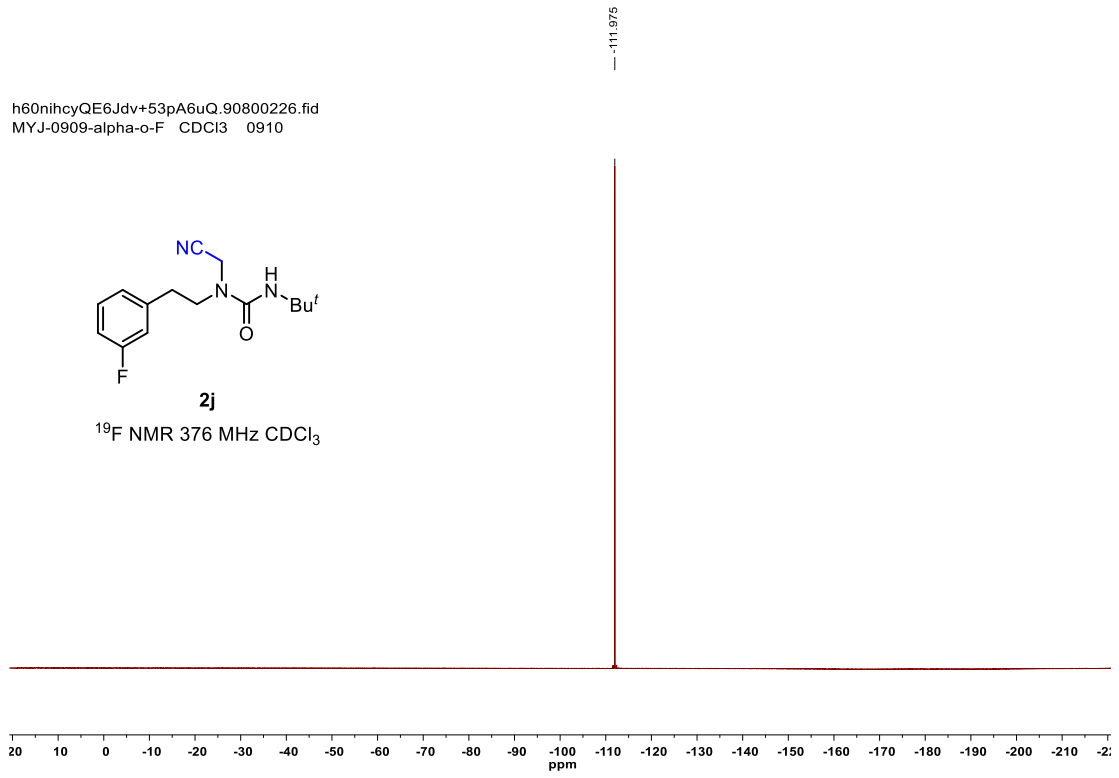

LHL-meta-Cl-HNMR-3.1.fid

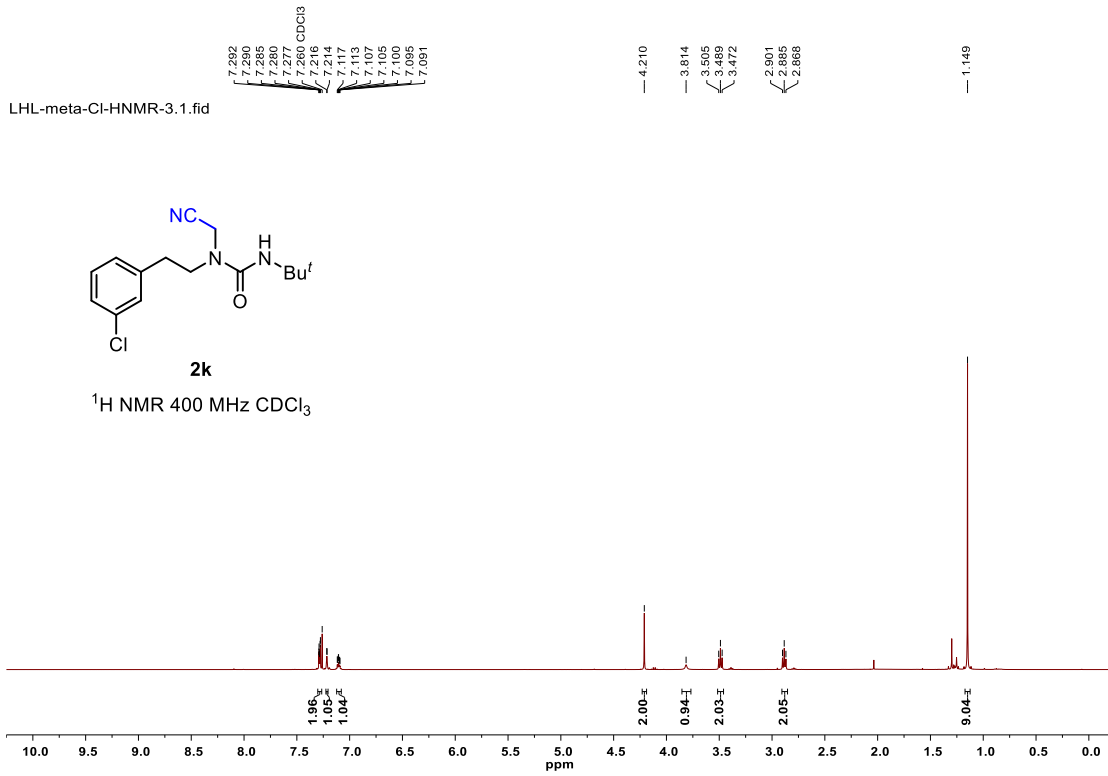

LHL-meta-Cl-CNMR-3.1.fid  
13C

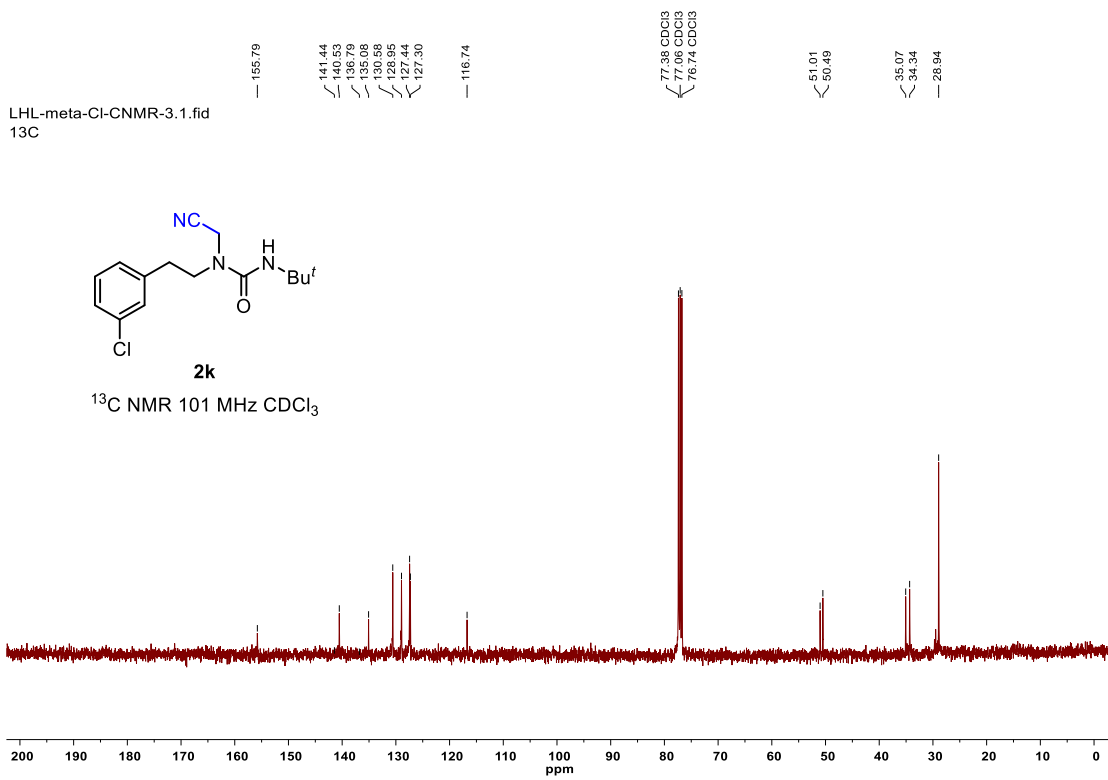

LHL-meta-CF3-HNMR-8.1.fid

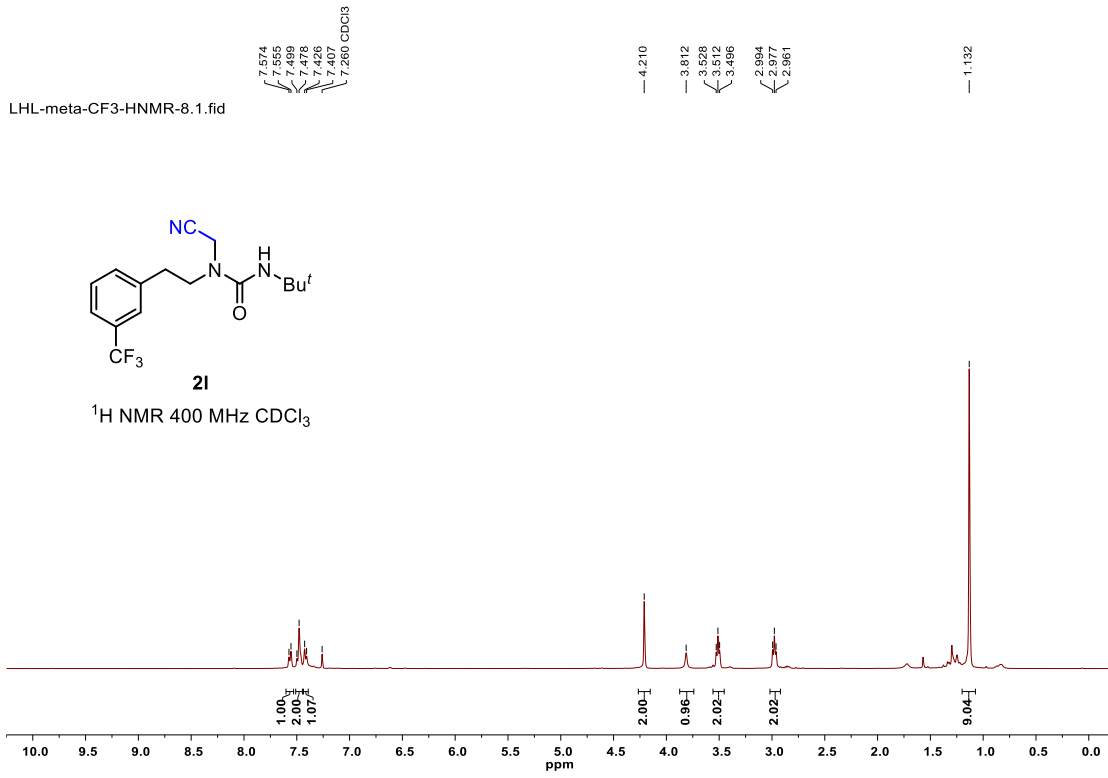

LHL-meta-CF3-CNMR-8.1.fid

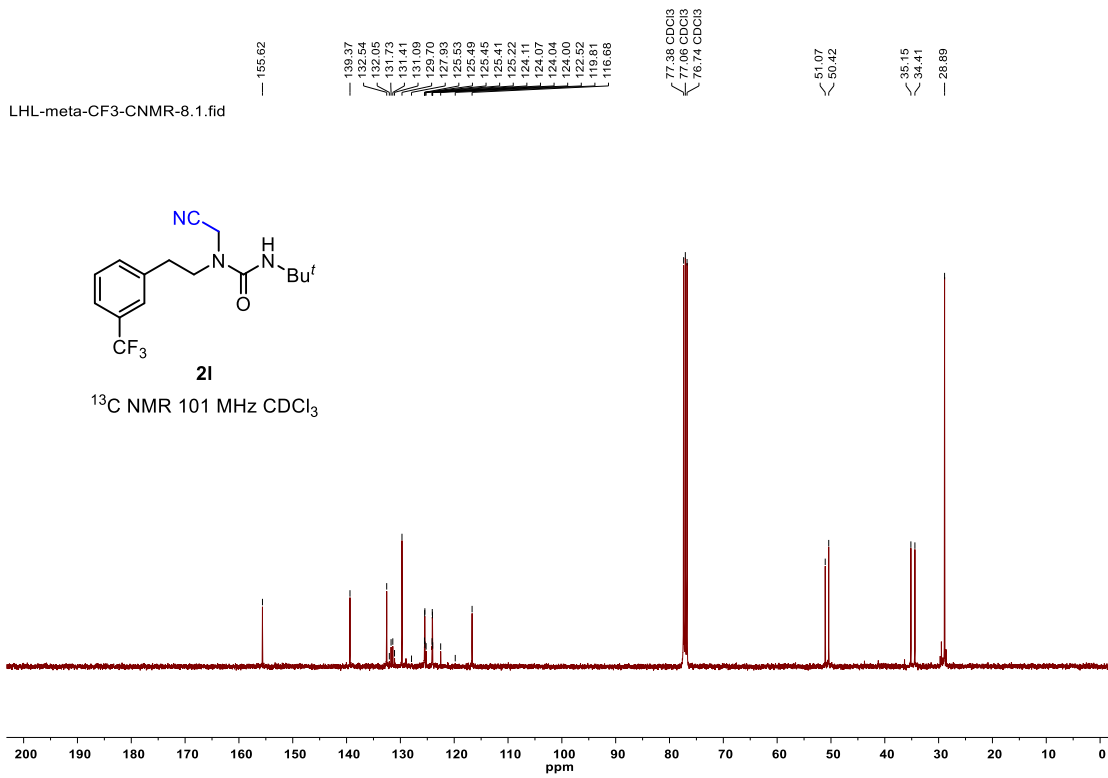

h60nihcyQE6Jdv+53pA6uQ.90800225.fid  
MYJ-0909-alpha-m-CF3 CDCl3 0910

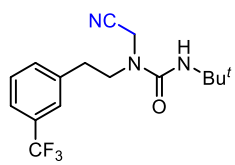

<sup>19</sup>F NMR 376 MHz CDCl<sub>3</sub>

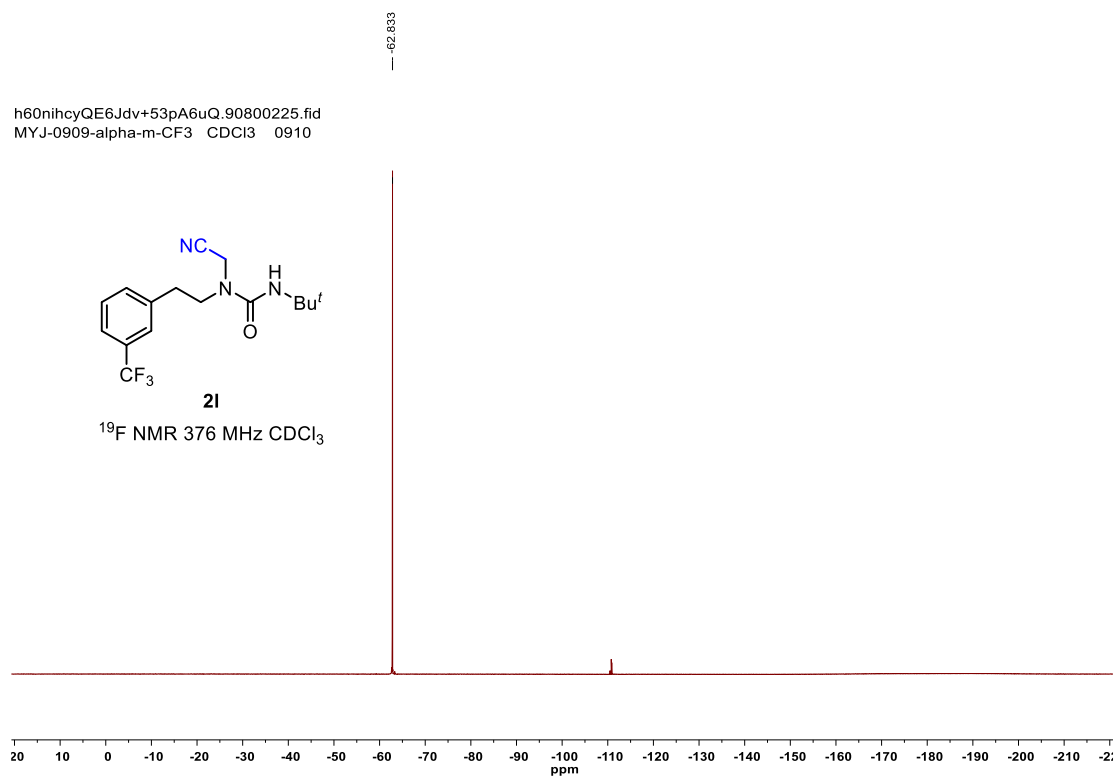



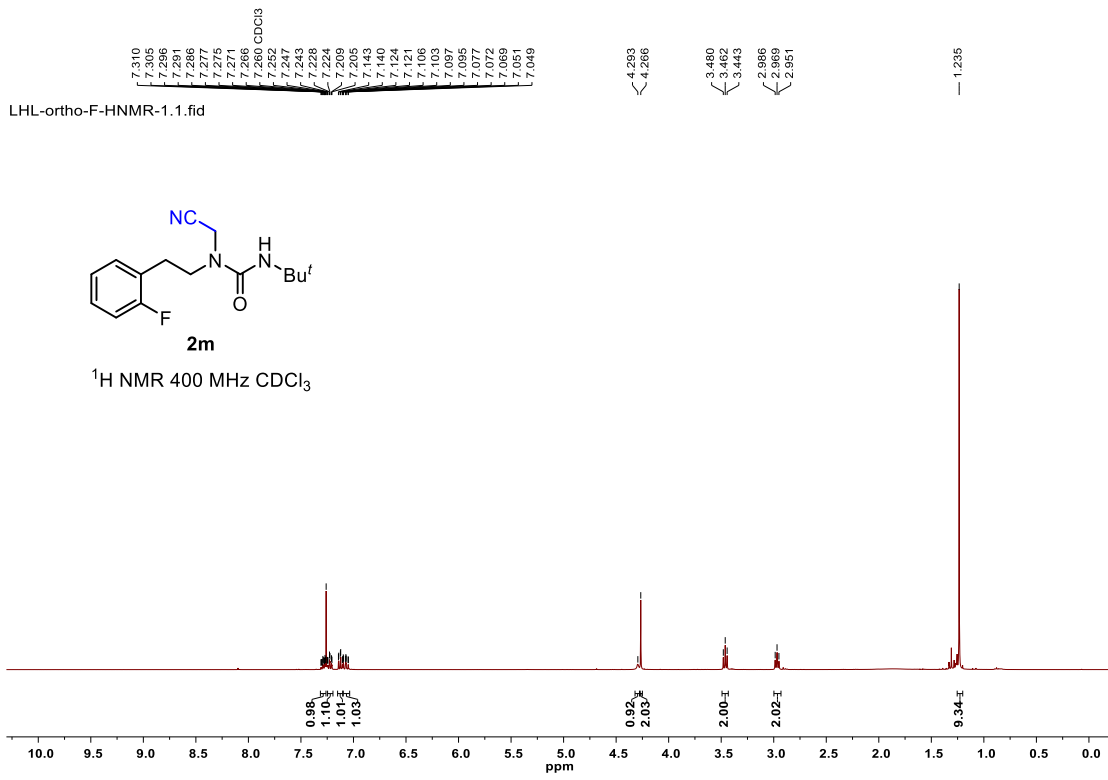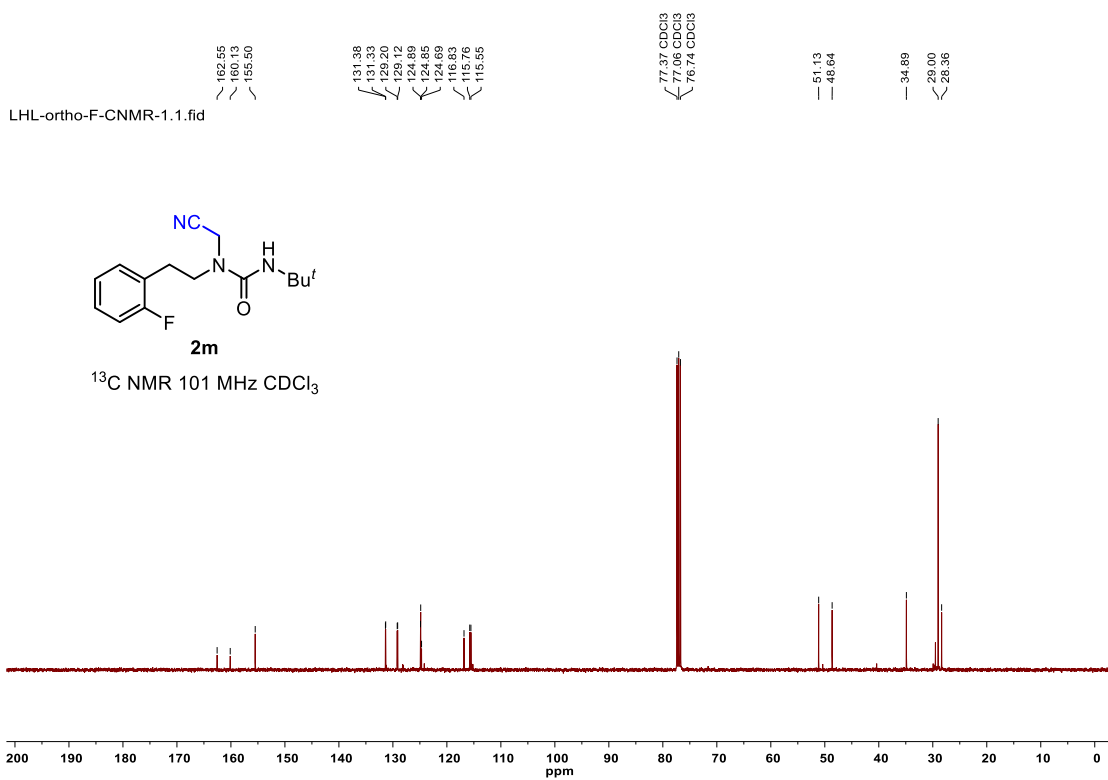

h60nihcyQE6Jdv+53pA6uQ.90800224.fid  
MYJ-0909-alpha-m-F CDCl3 0910

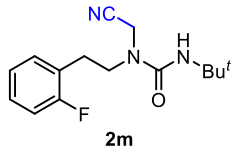

<sup>19</sup>F NMR 376 MHz CDCl<sub>3</sub>

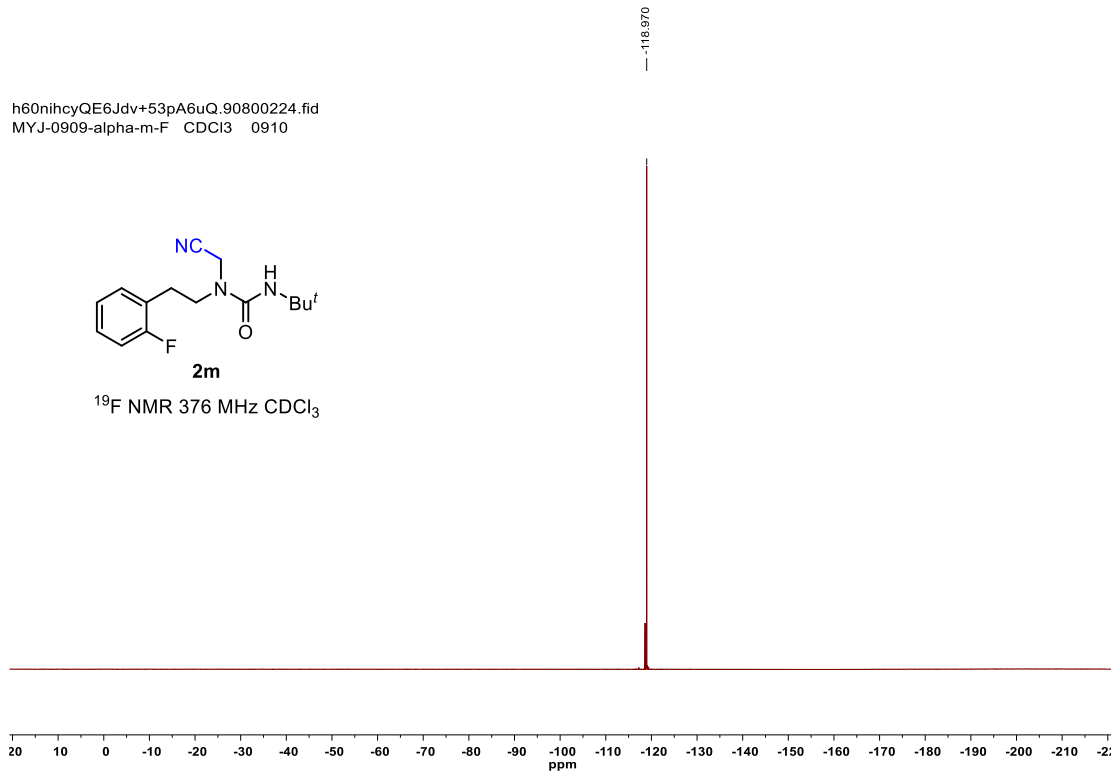

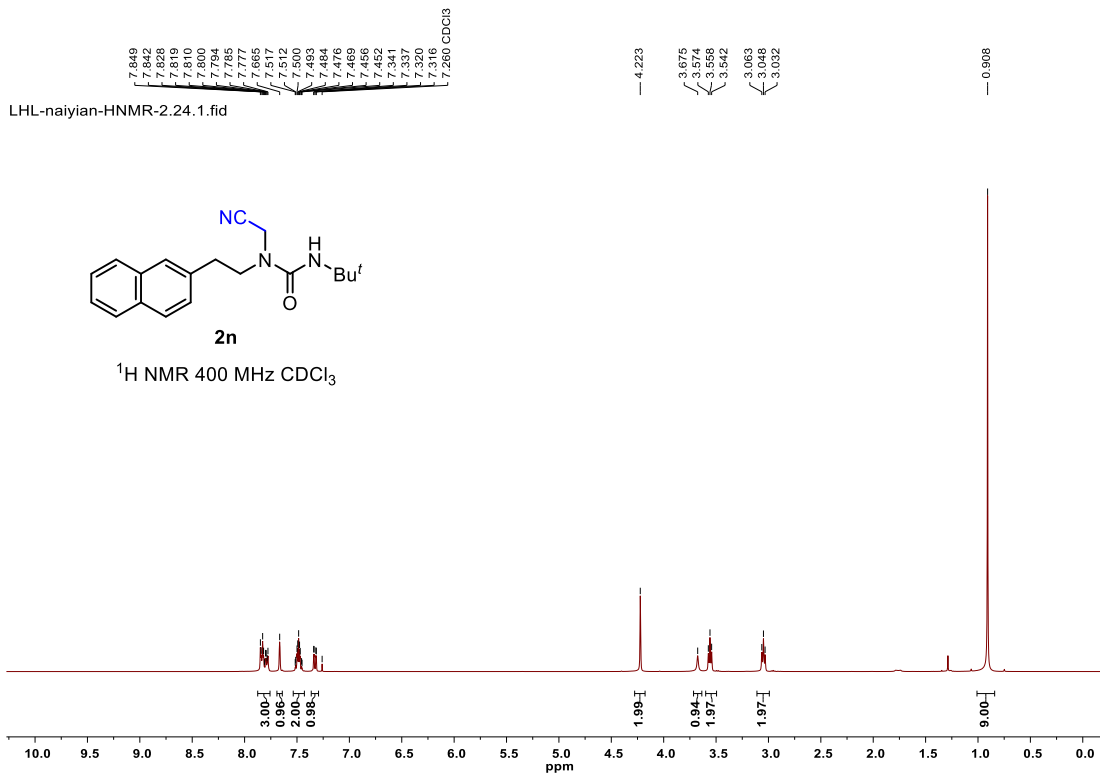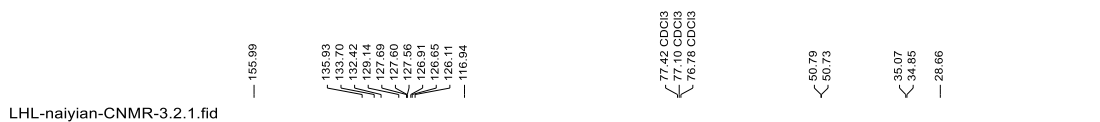

LHL-胡椒-NMR-16.1.fid

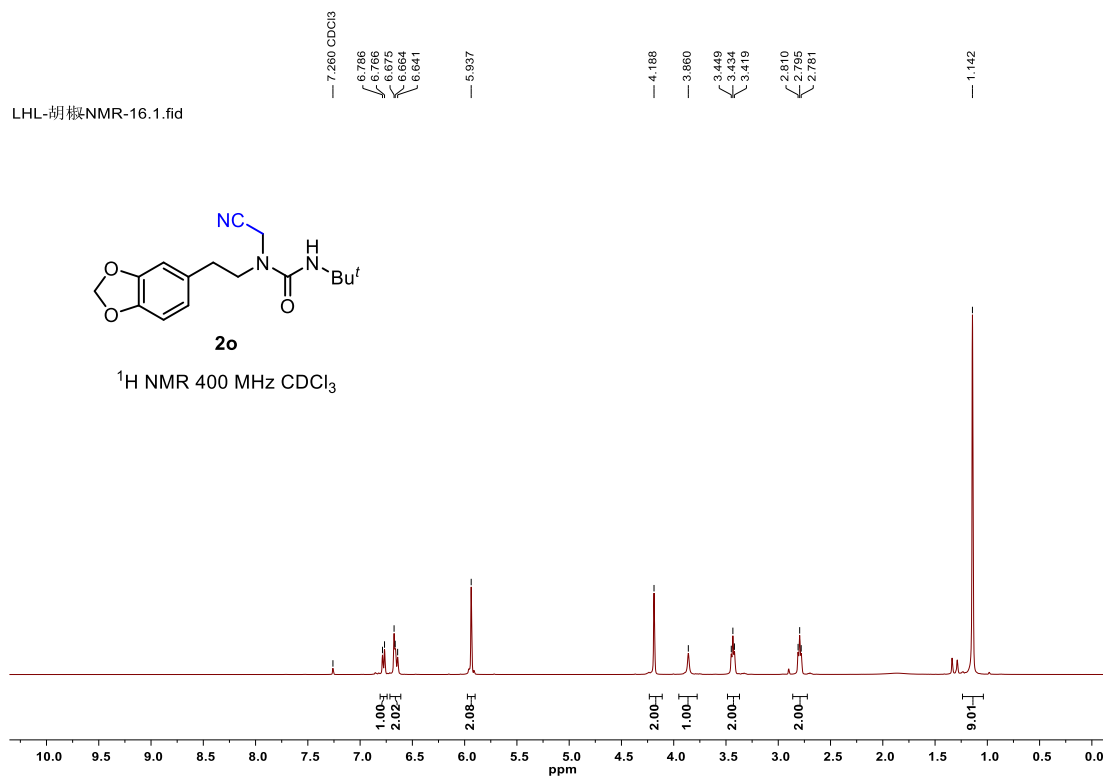

LHL-胡椒-NMR-16.2.fid

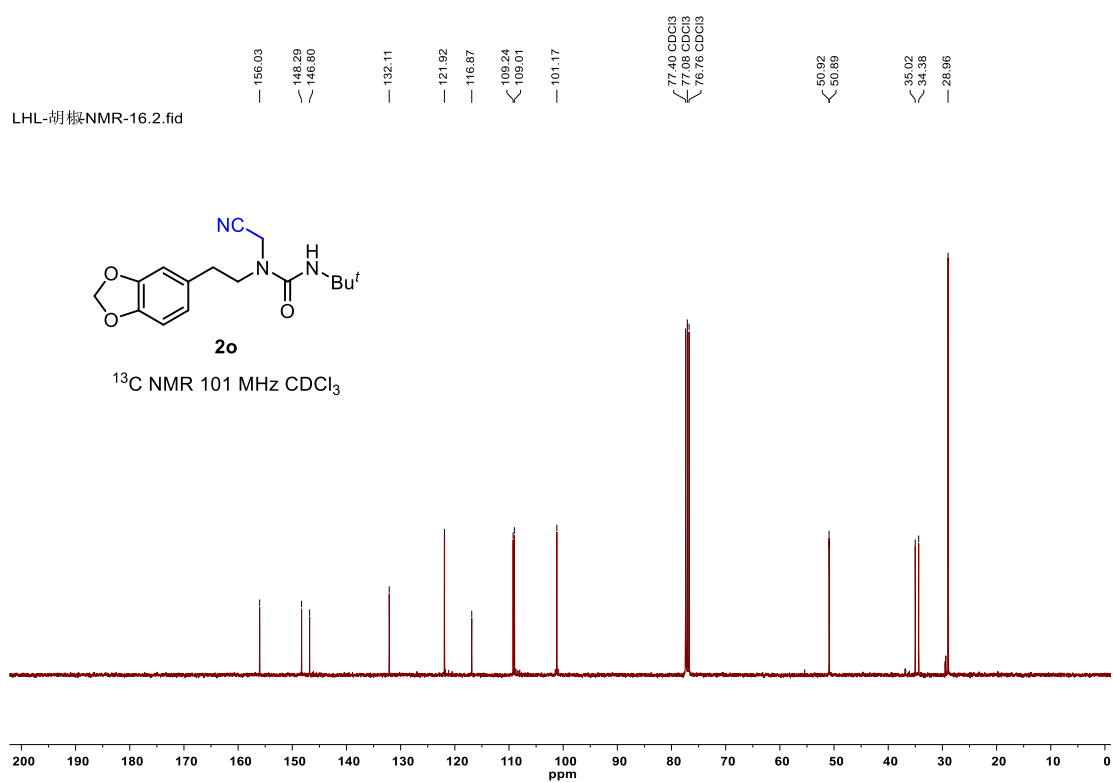

LHL-ph-funan-HNMR-20.1.fid

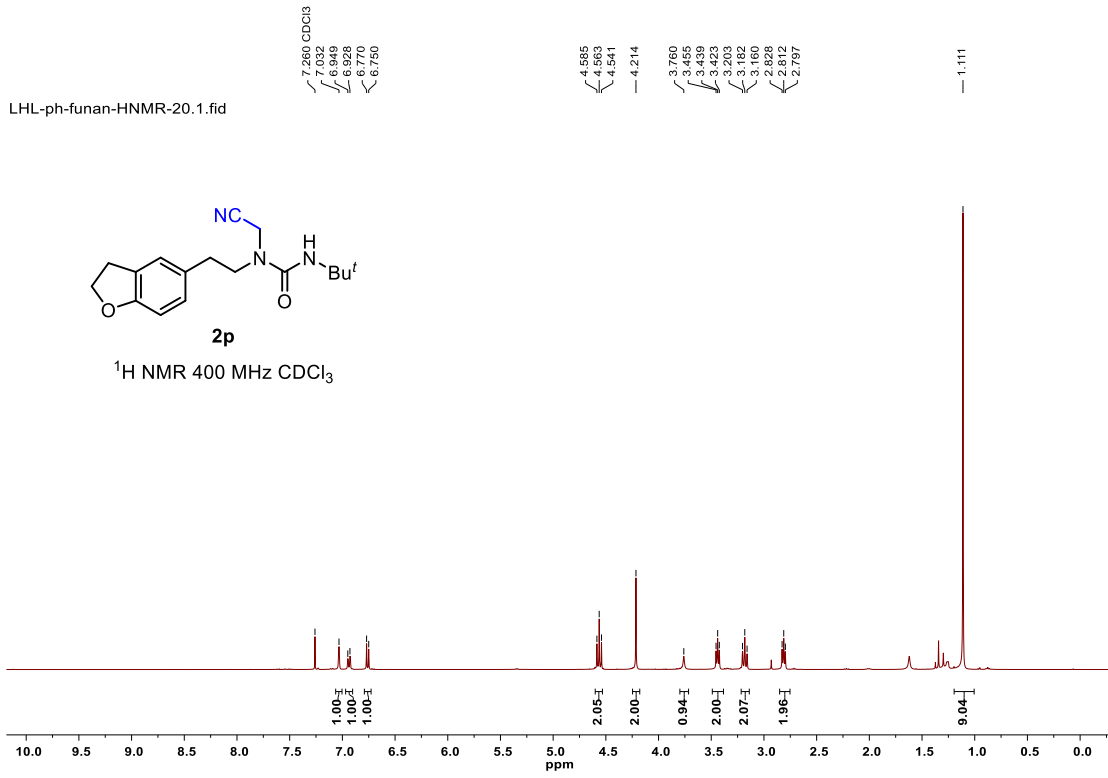

LHL-Ph-funnan-3.2-CNMR.1.fid

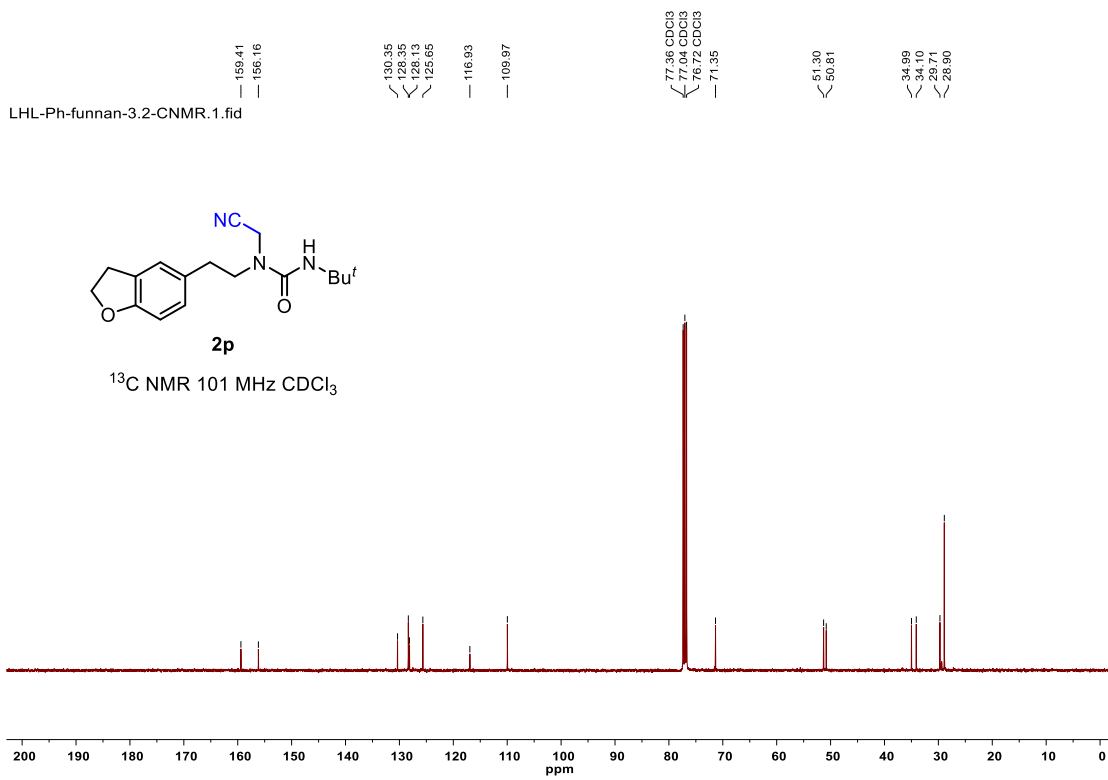

LHL-3-que-alpha.11.fid

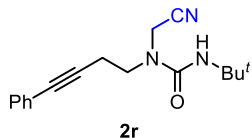

<sup>1</sup>H NMR 400 MHz CDCl<sub>3</sub>

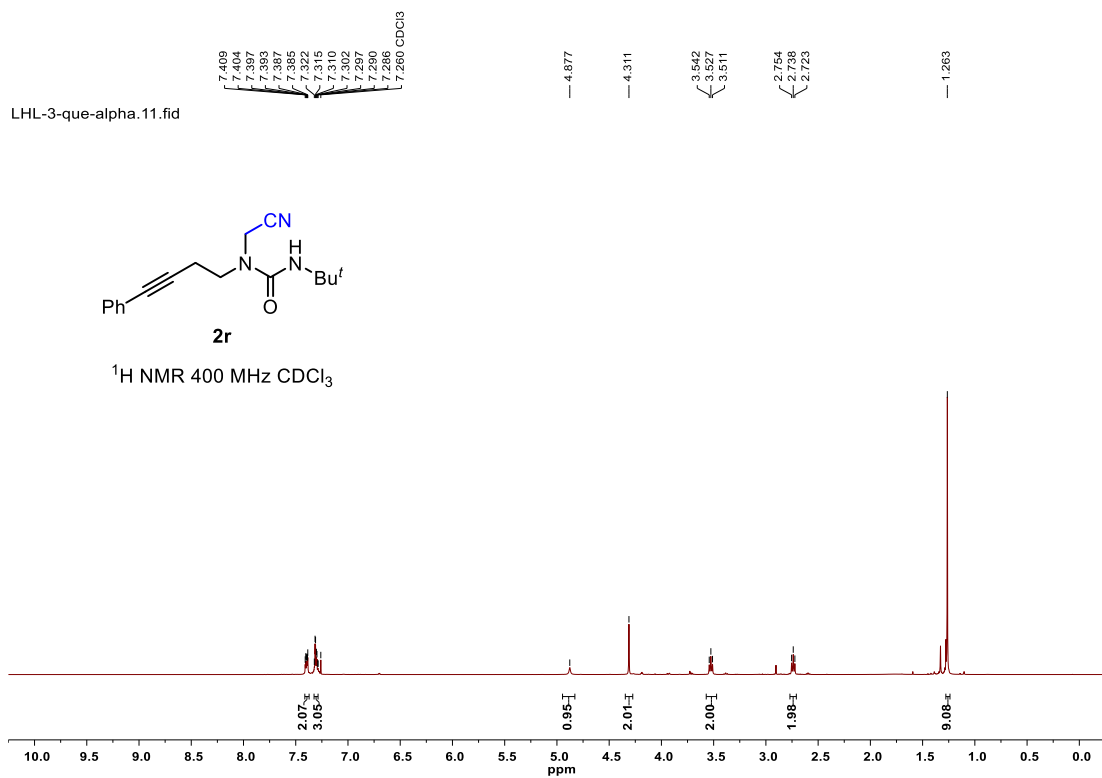

LHL-que-alpha-CNMR.1.fid

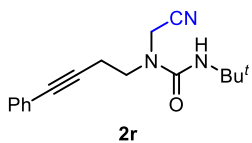

<sup>13</sup>C NMR 101 MHz CDCl<sub>3</sub>

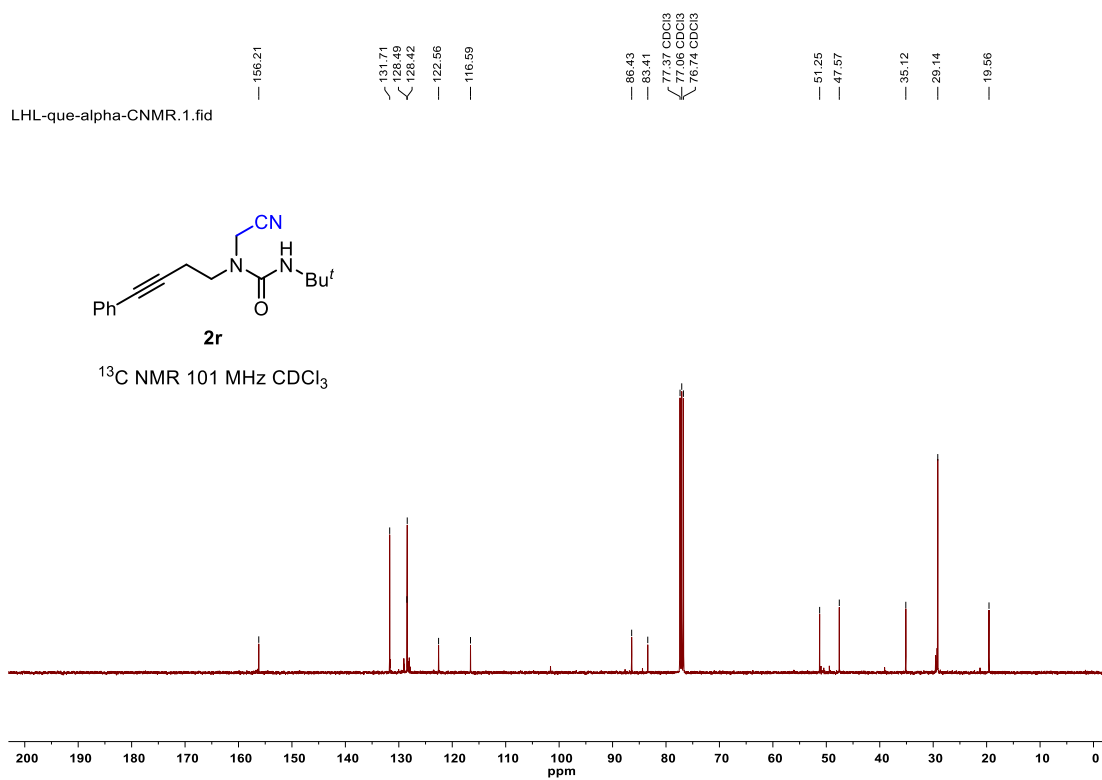

LHL-<sup>13</sup>C-Ph-NMR-17.1.fid

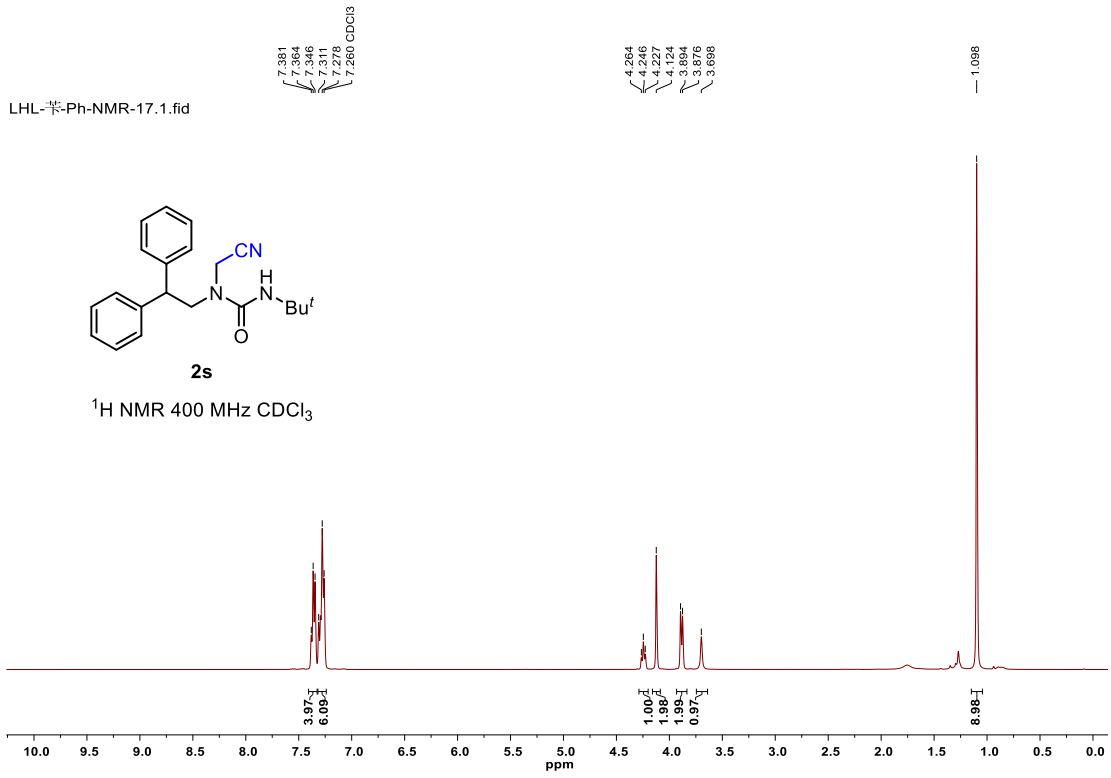

LHL-<sup>13</sup>C-Ph-NMR-17.2.fid

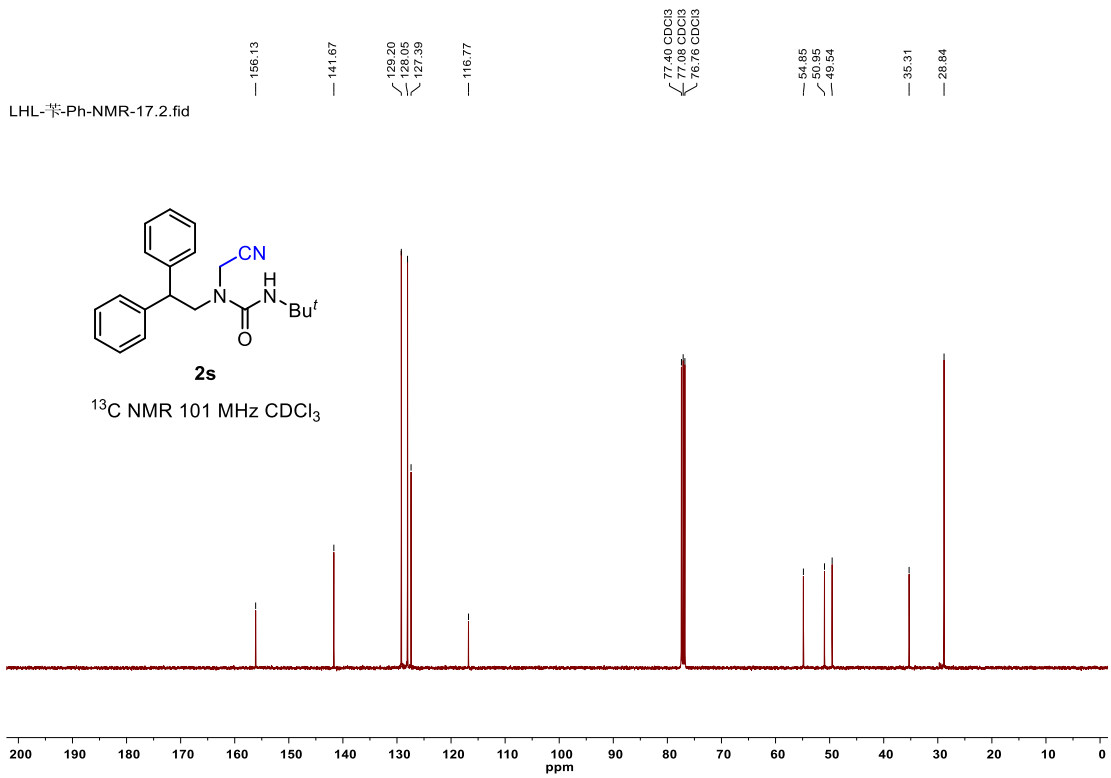

LHL-苯丙胺HNMR-12.1.fid

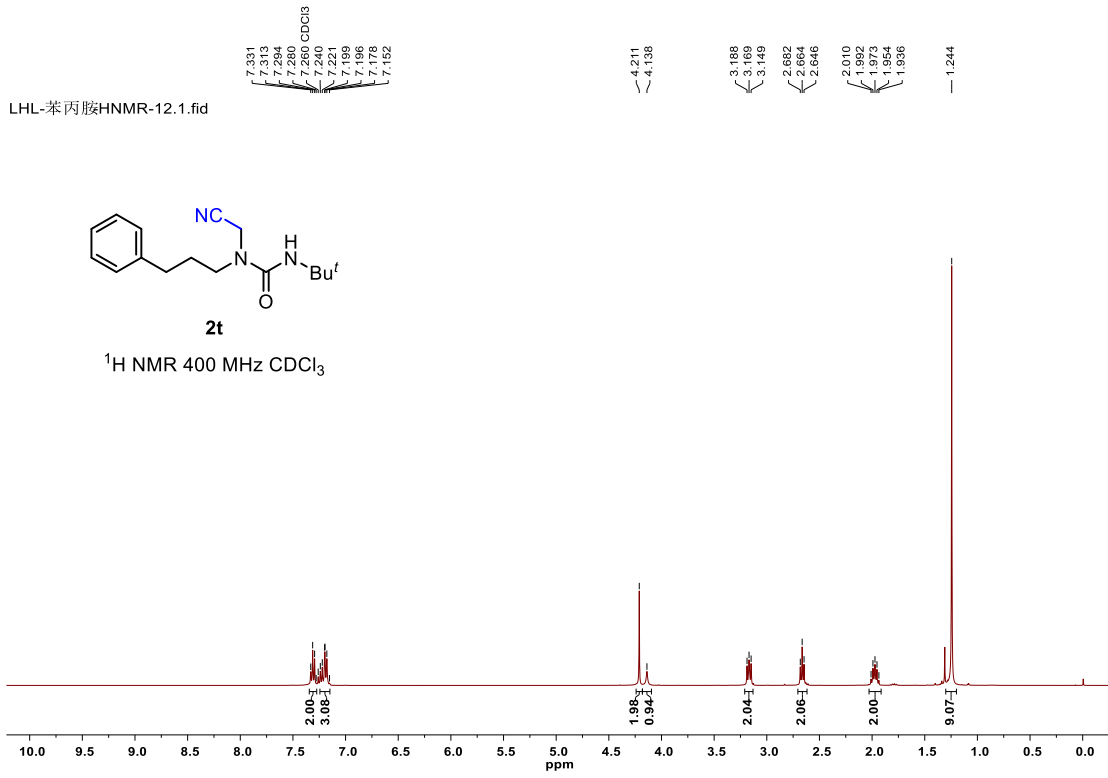

LHL-苯丙胺CNMR-12.1.fid

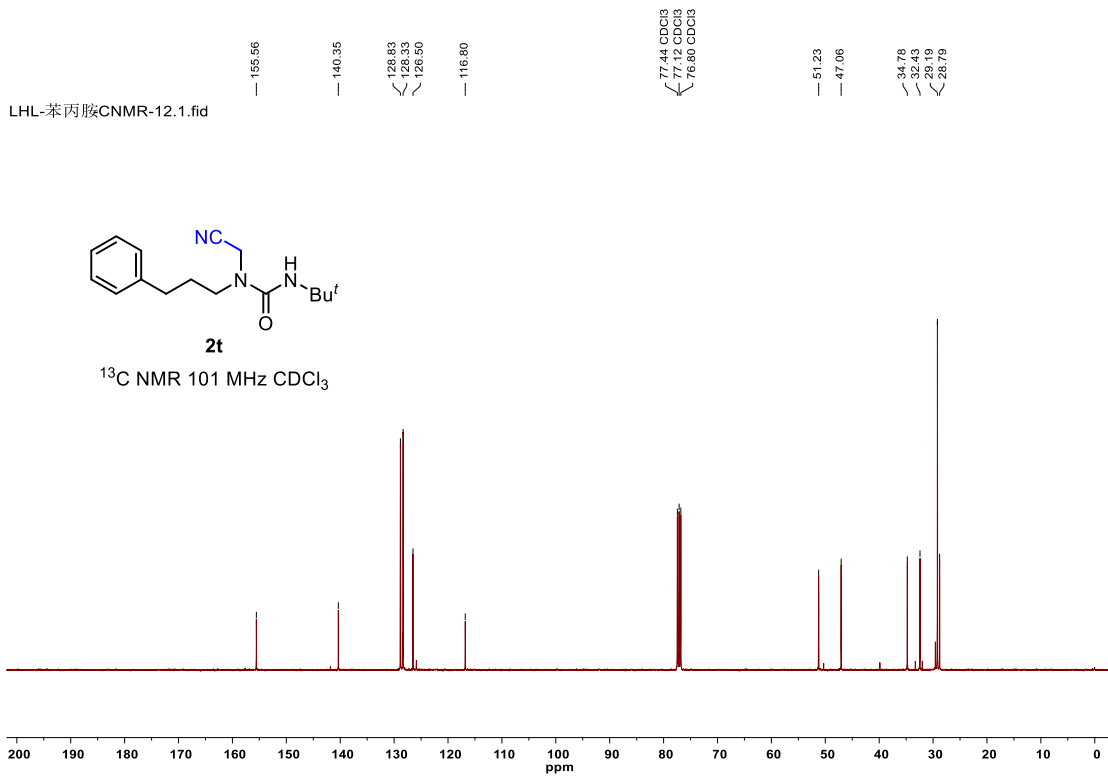



LHL-苯胺-NMR-18.1.fid

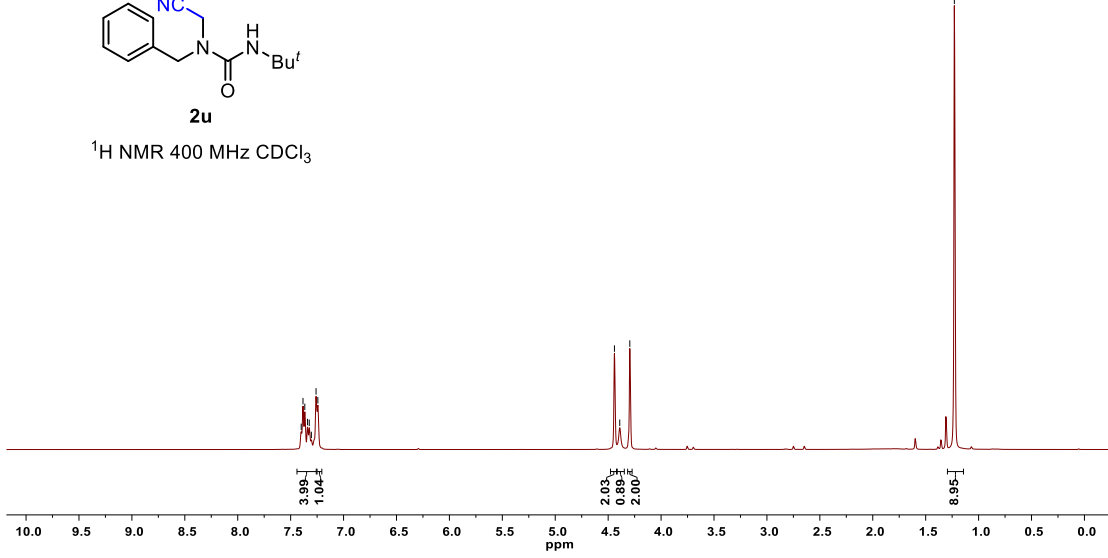

LHL-苯胺-NMR-18.2.fid

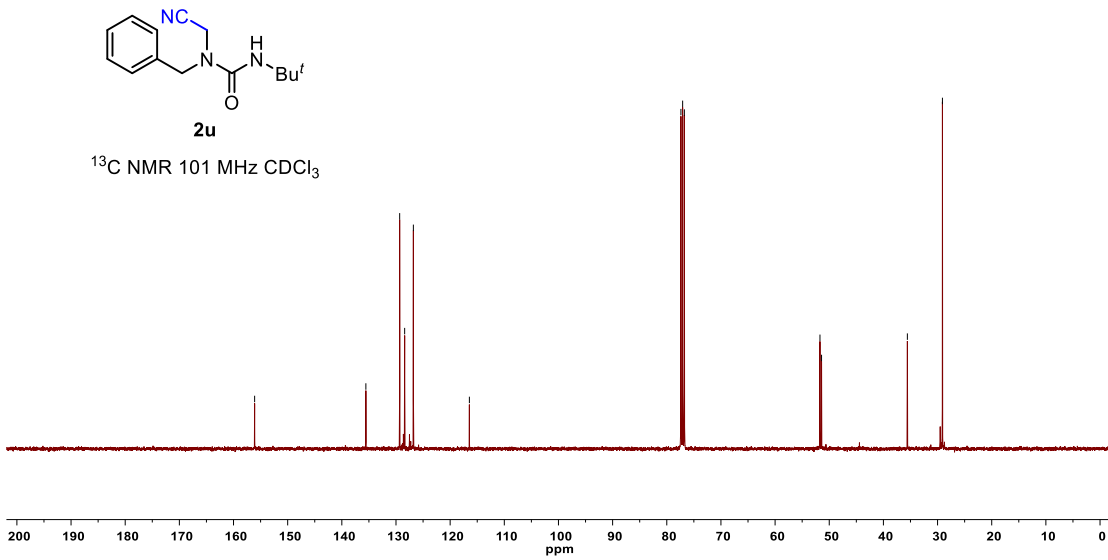

LHL-苯位HNMR-11.1.fid

7.441  
7.437  
7.421  
7.417  
7.413  
7.406  
7.403  
7.398  
7.392  
7.390  
7.371  
7.360  
7.348  
7.344  
7.280 CDCl<sub>3</sub>  
6.876

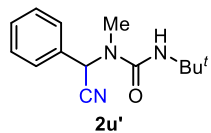

<sup>1</sup>H NMR 400 MHz CDCl<sub>3</sub>

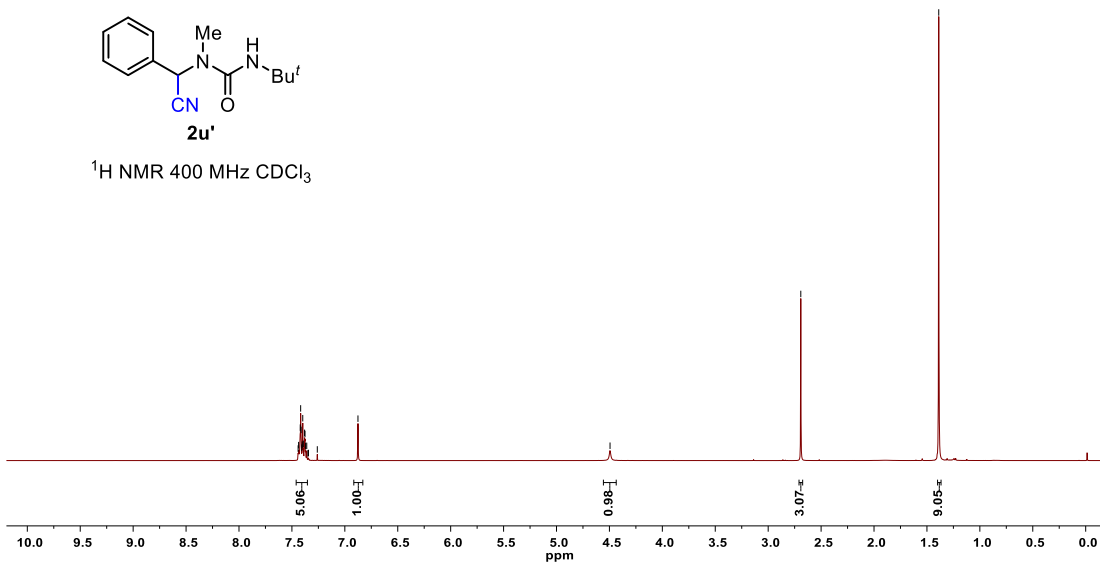

LHL-苯位CNMR-11.1.fid

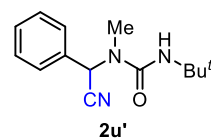

<sup>13</sup>C NMR 101 MHz CDCl<sub>3</sub>

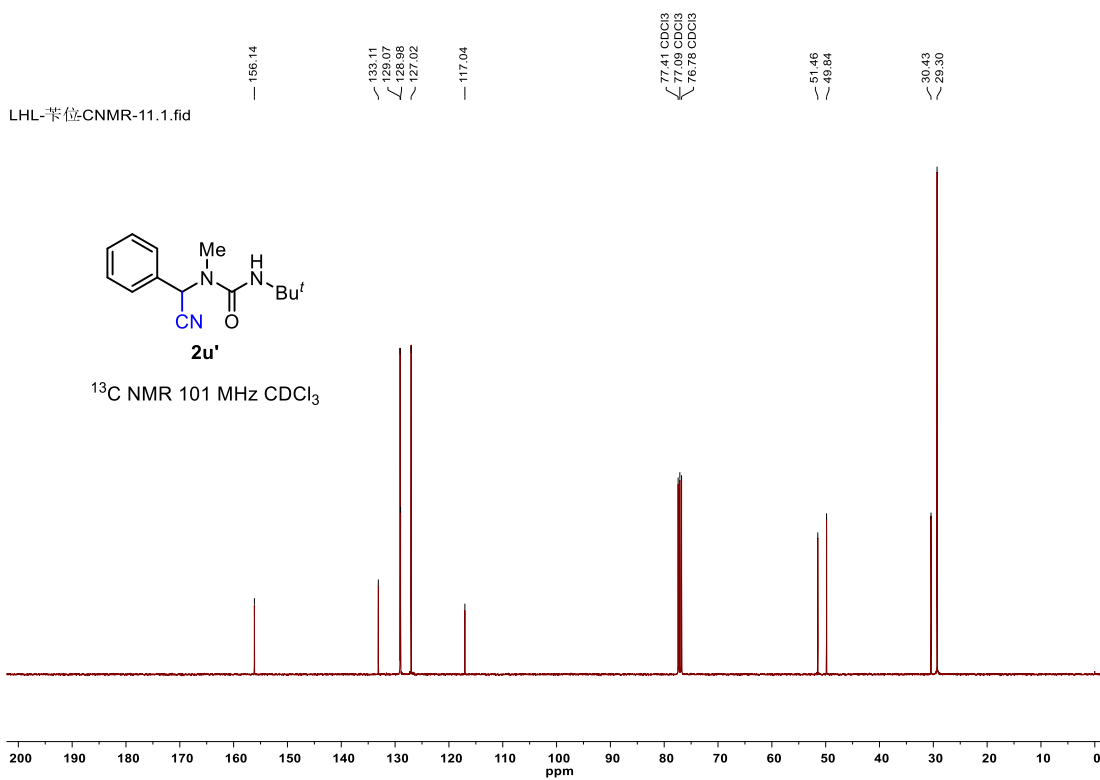

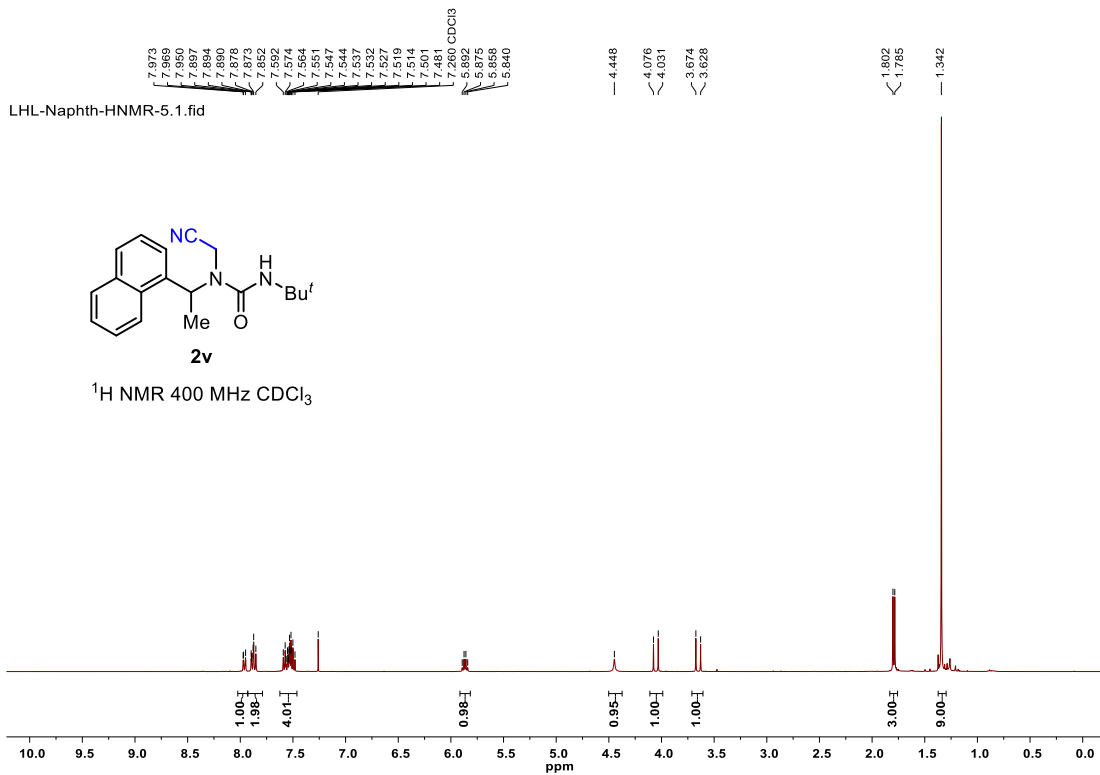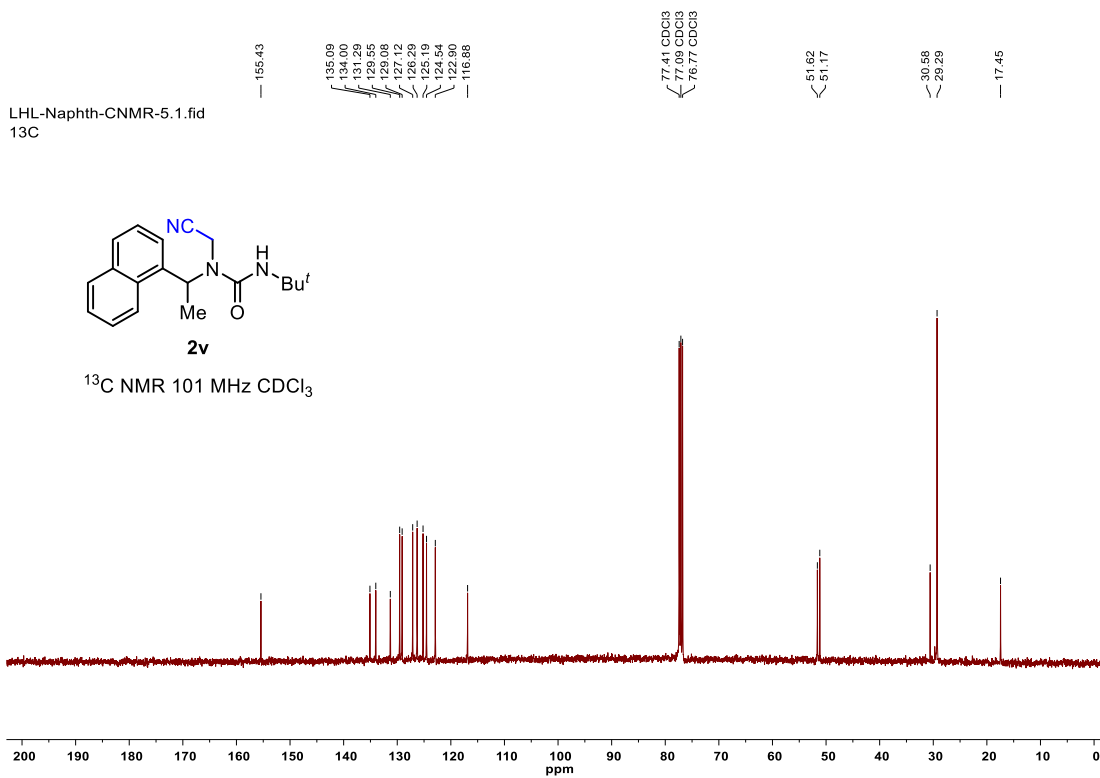

LHL-环己胺HNMR-13.1.fid

— 7.260 CDCl<sub>3</sub>

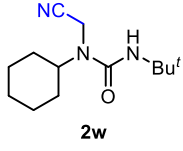

<sup>1</sup>H NMR 400 MHz CDCl<sub>3</sub>

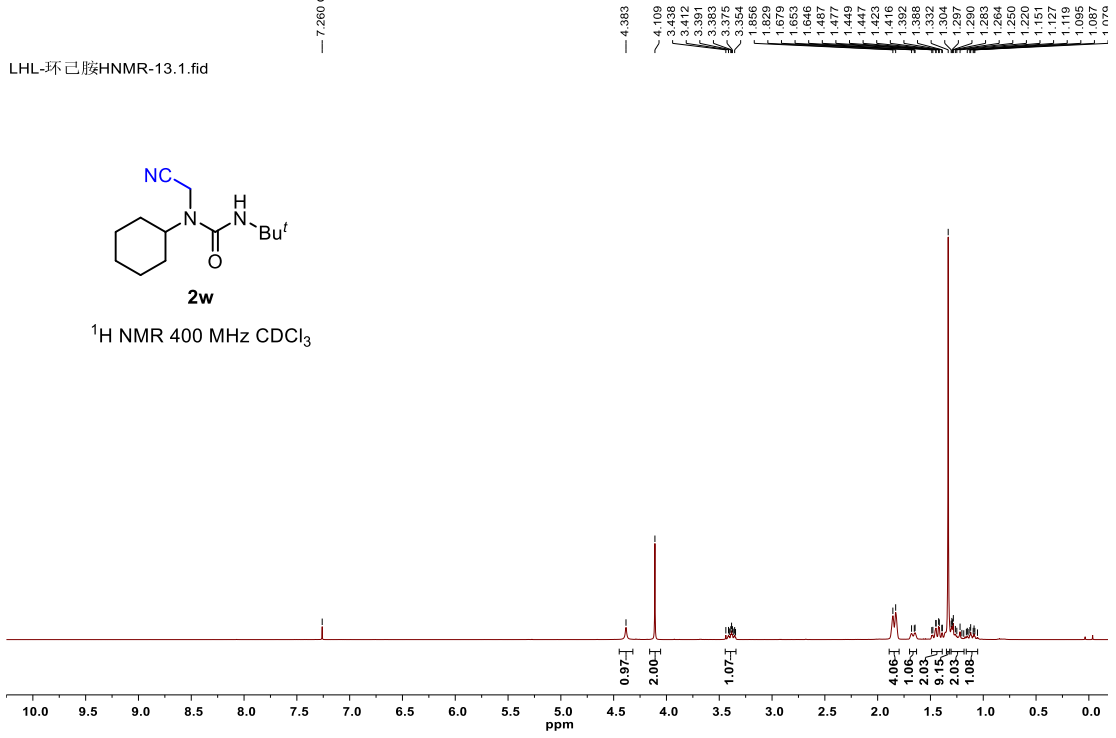

LHL-环己胺CNMR-13.1.fid

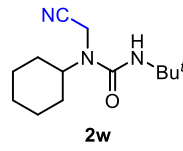

<sup>13</sup>C NMR 101 MHz CDCl<sub>3</sub>

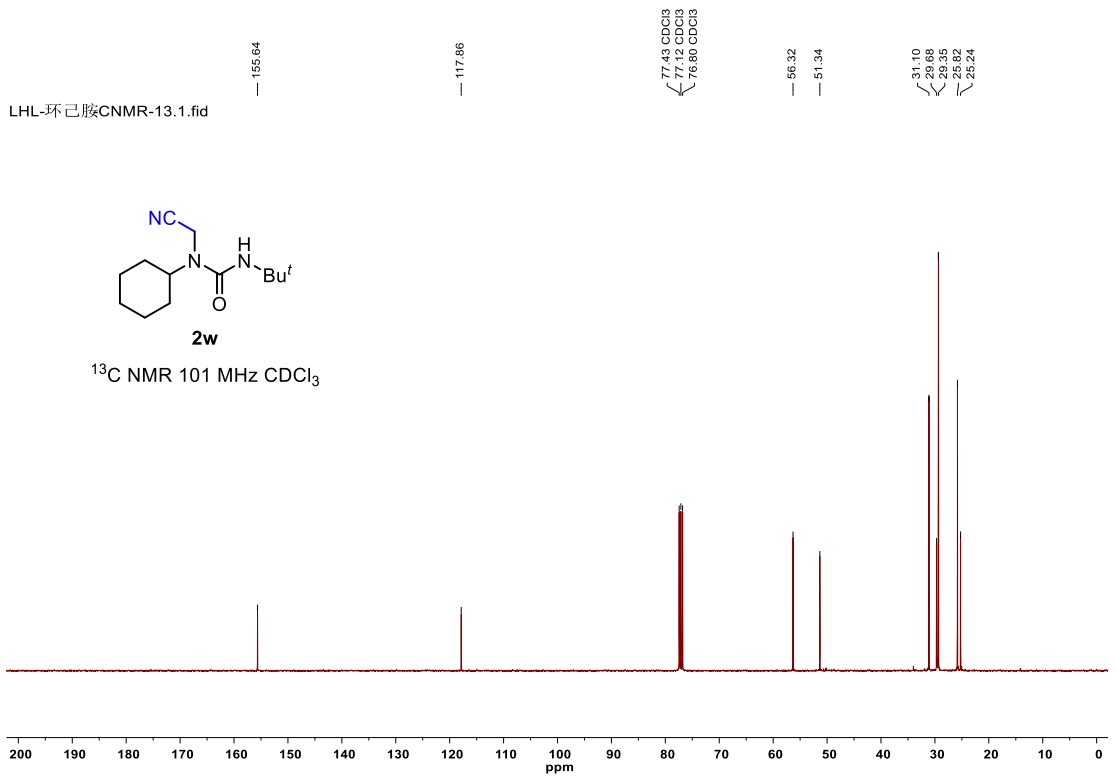

LHL-噻吩-NMR-14.1.fid

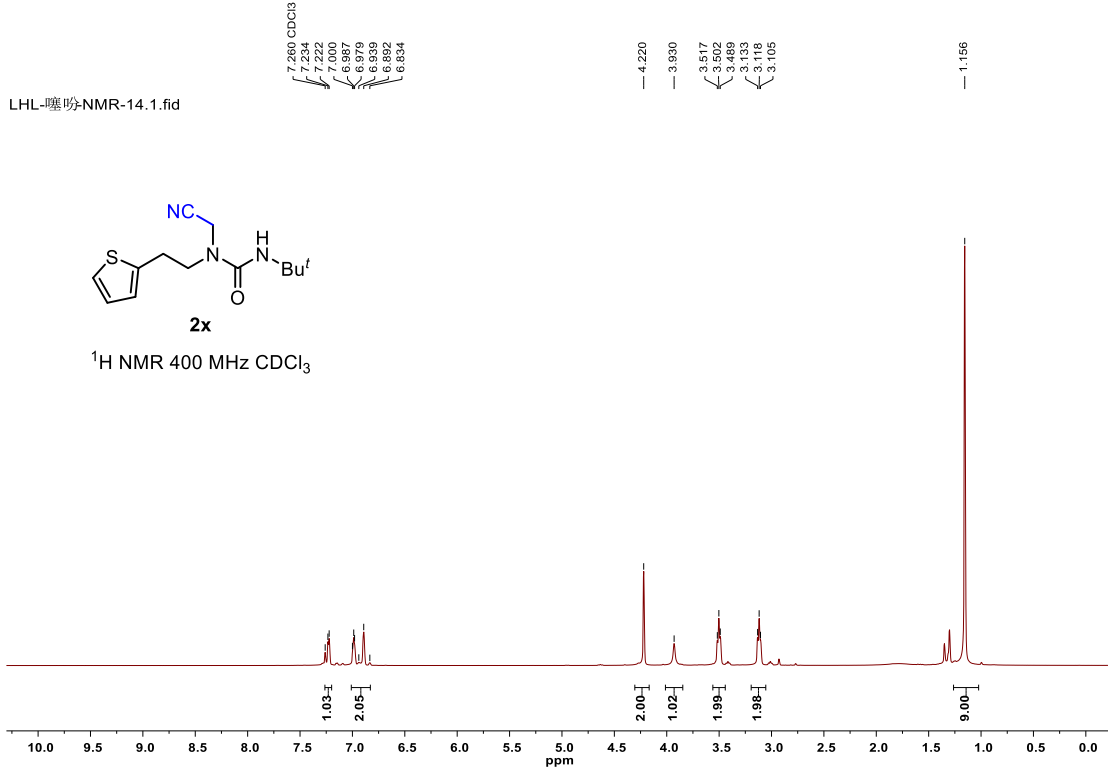

LHL-噻吩-NMR-14.2.fid

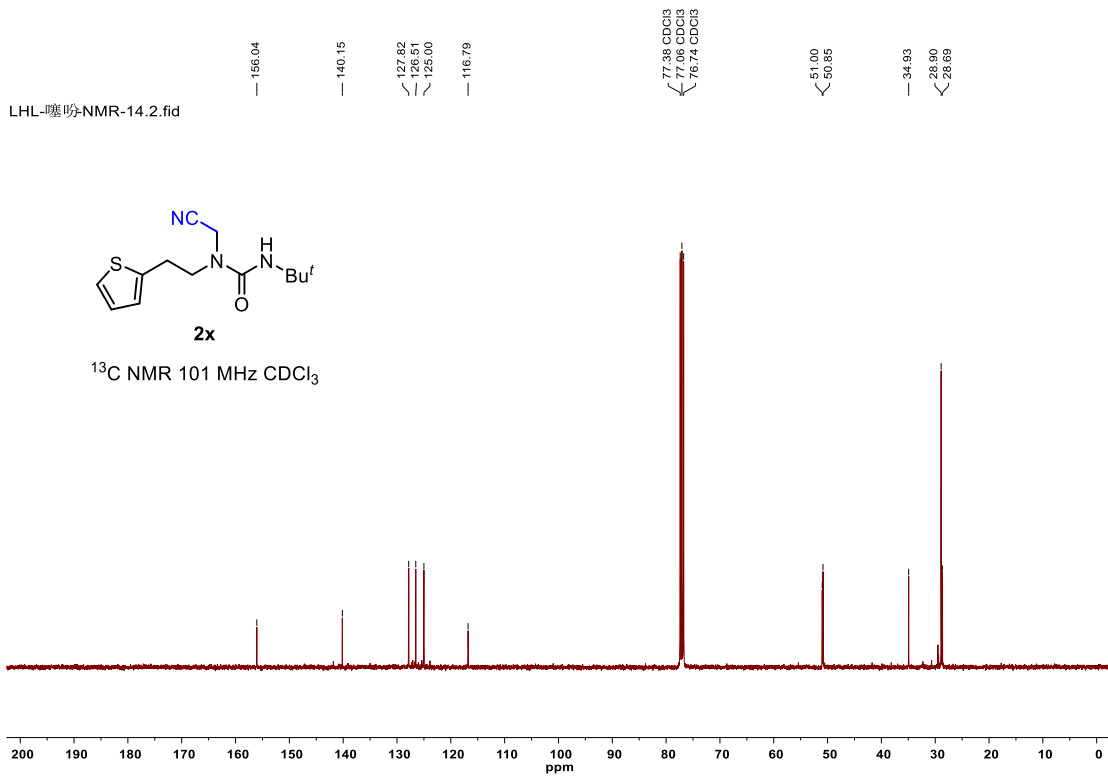

LHL-2-tong-alpha.11.fid

8.071  
8.066  
7.893  
7.880  
7.864  
7.861  
7.582  
7.582  
7.573  
7.570  
7.555  
7.551  
7.496  
7.492  
7.492  
7.473  
7.473  
7.457  
7.454  
7.384  
7.381  
7.365  
7.365  
7.348  
7.342  
7.327  
7.321  
7.260 CDCl<sub>3</sub>  
7.054  
7.054  
5.183  
4.220  
3.978  
3.515  
3.498  
3.482  
2.939  
2.923  
2.906

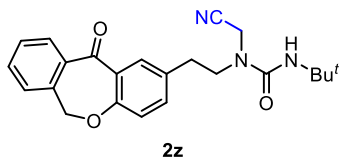

<sup>1</sup>H NMR 400 MHz CDCl<sub>3</sub>

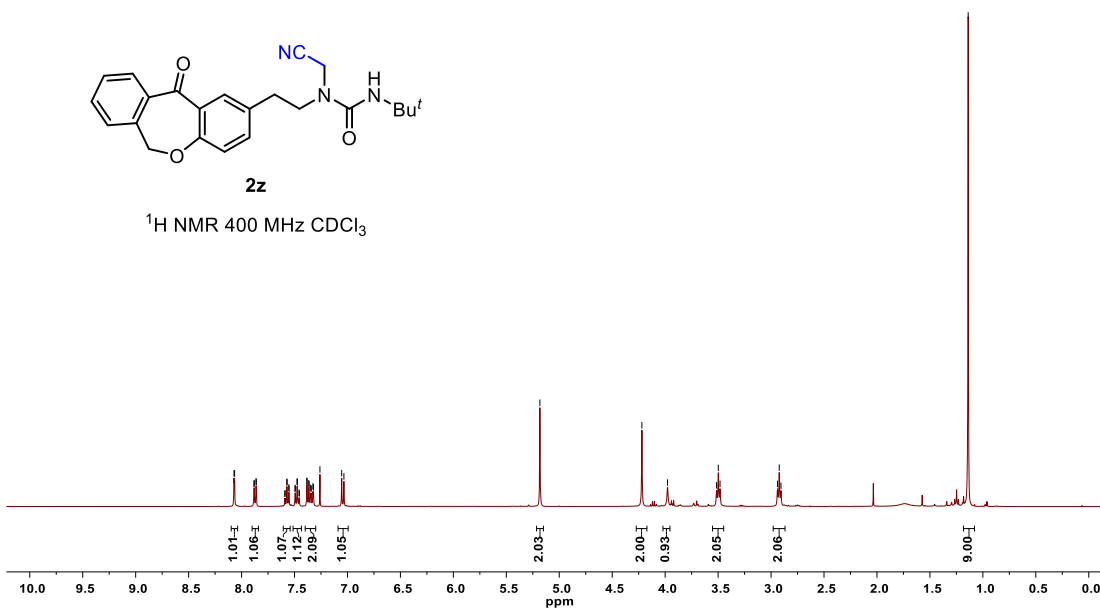

LHL-tong-alpha-CNMR.1.fid

190.83  
160.46  
155.74  
140.31  
136.17  
135.45  
134.89  
134.87  
131.51  
129.45  
129.38  
127.93  
125.68  
121.69  
116.73  
77.38 CDCl<sub>3</sub>  
77.06 CDCl<sub>3</sub>  
76.74 CDCl<sub>3</sub>  
73.86  
51.03  
50.45  
35.11  
35.11  
29.02

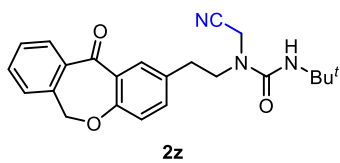

<sup>13</sup>C NMR 101 MHz CDCl<sub>3</sub>

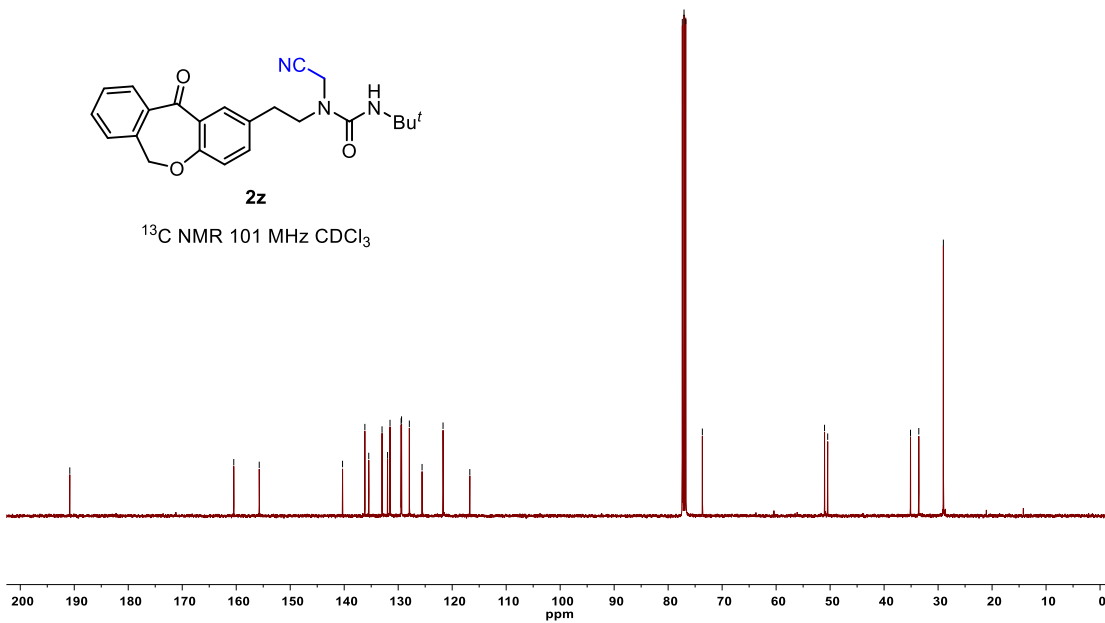

LHL-4-buluofen-alpha.11.fid

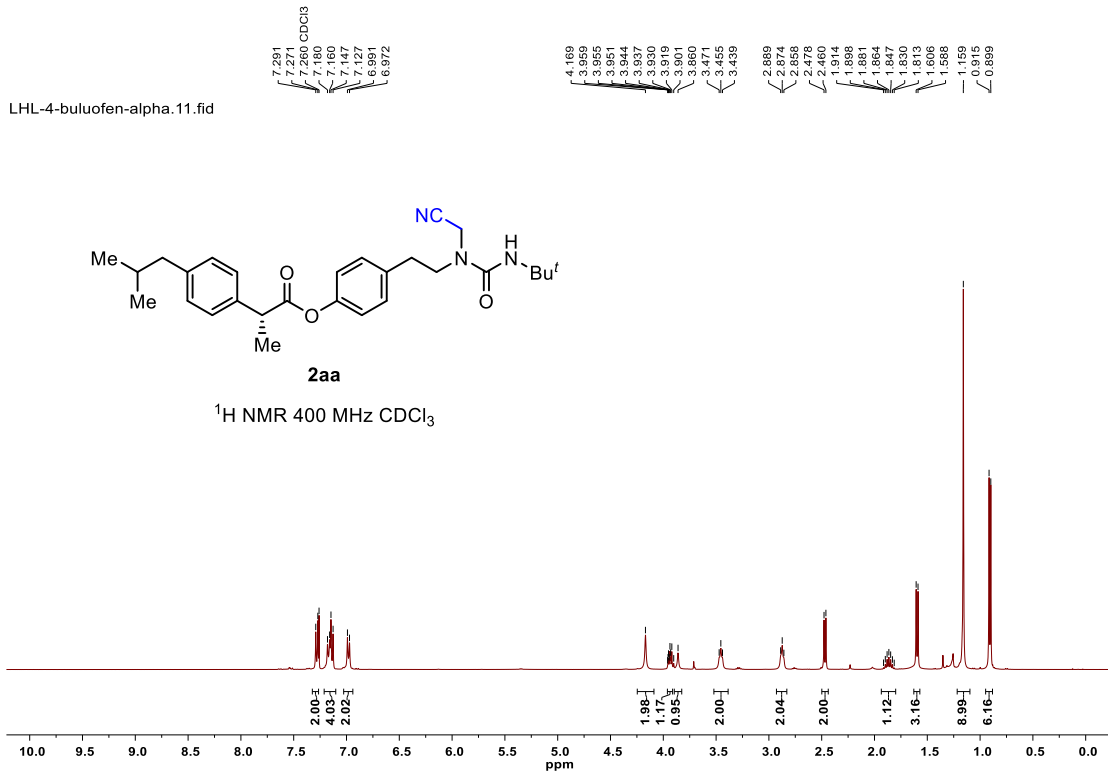

LHL-Ibuprofen-alpha-CNMR.1.fid

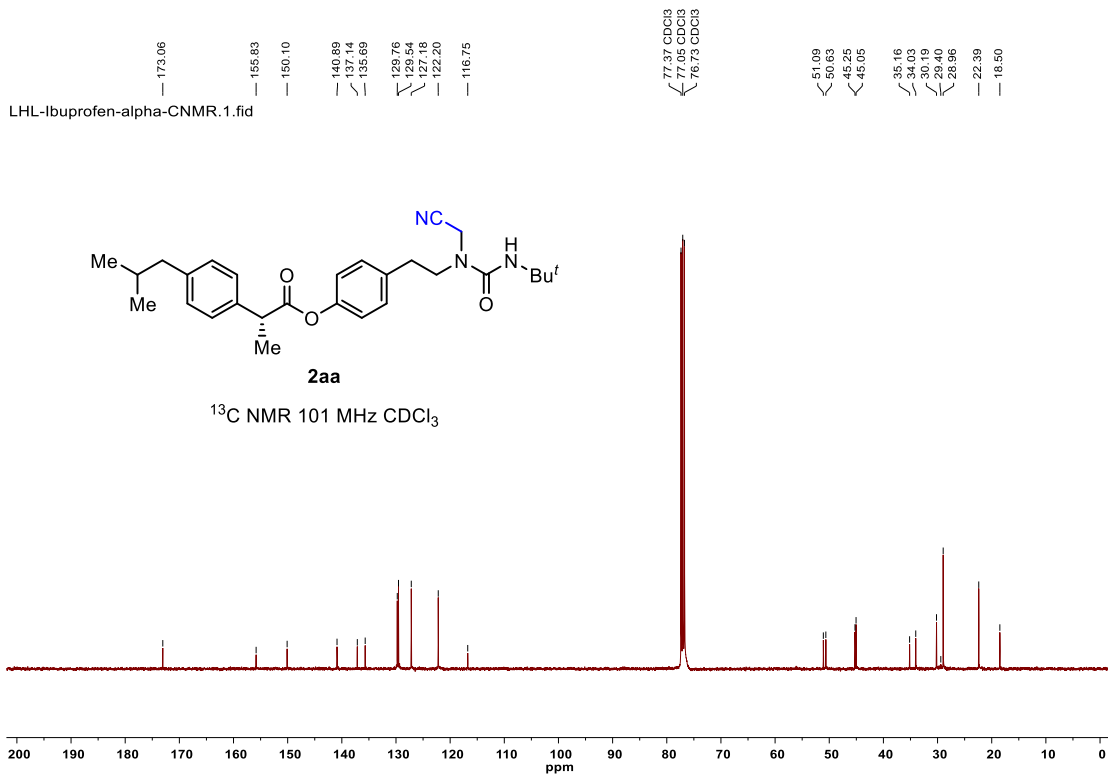

LHL-烯炔HNMR-19.1.fid

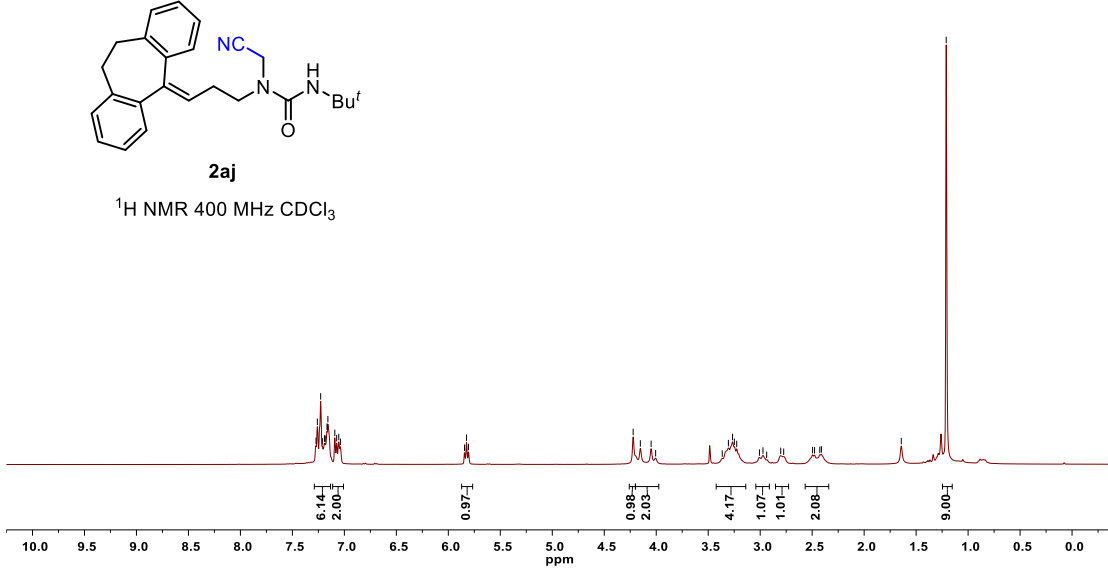

LHL-烯炔CNMR-19.1.fid

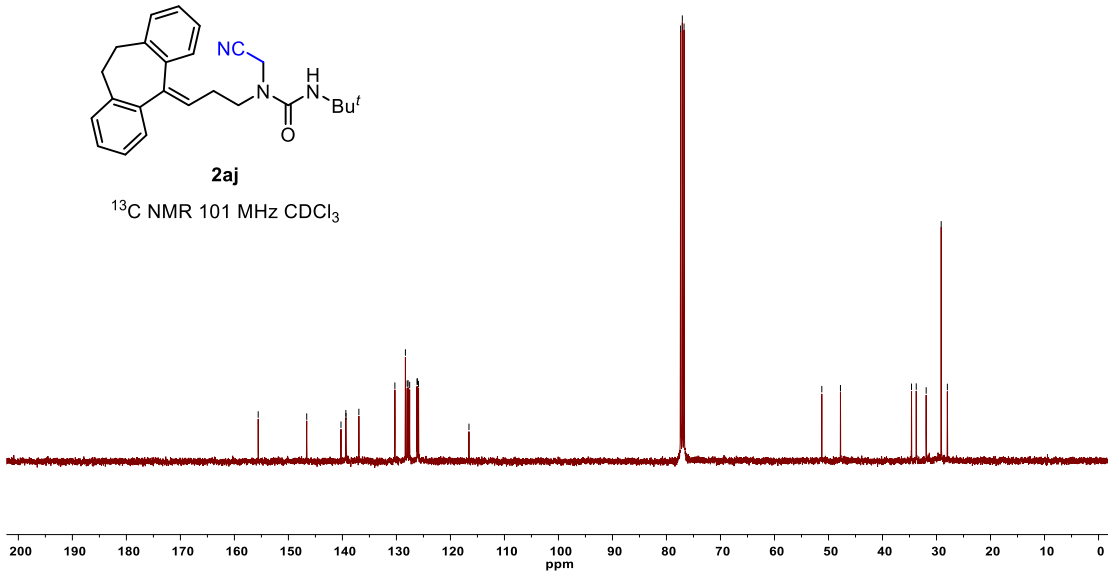



MYJ-0109-H.1.fid

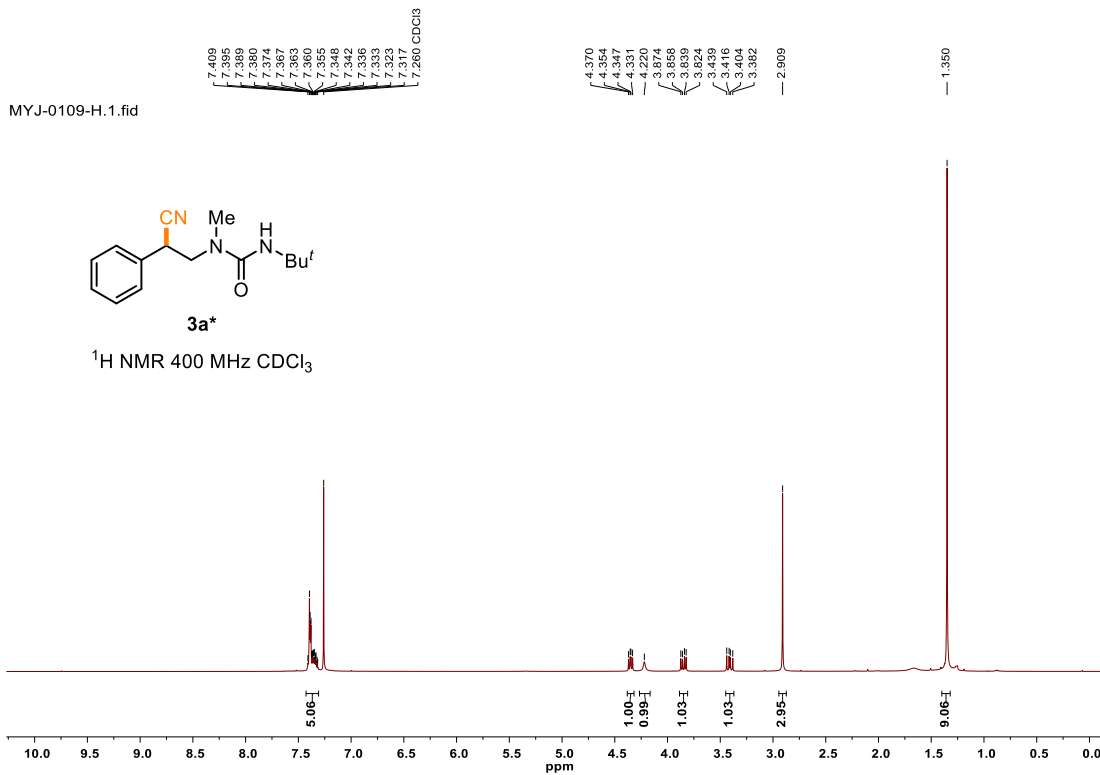

MYJ-0109-H.2.fid

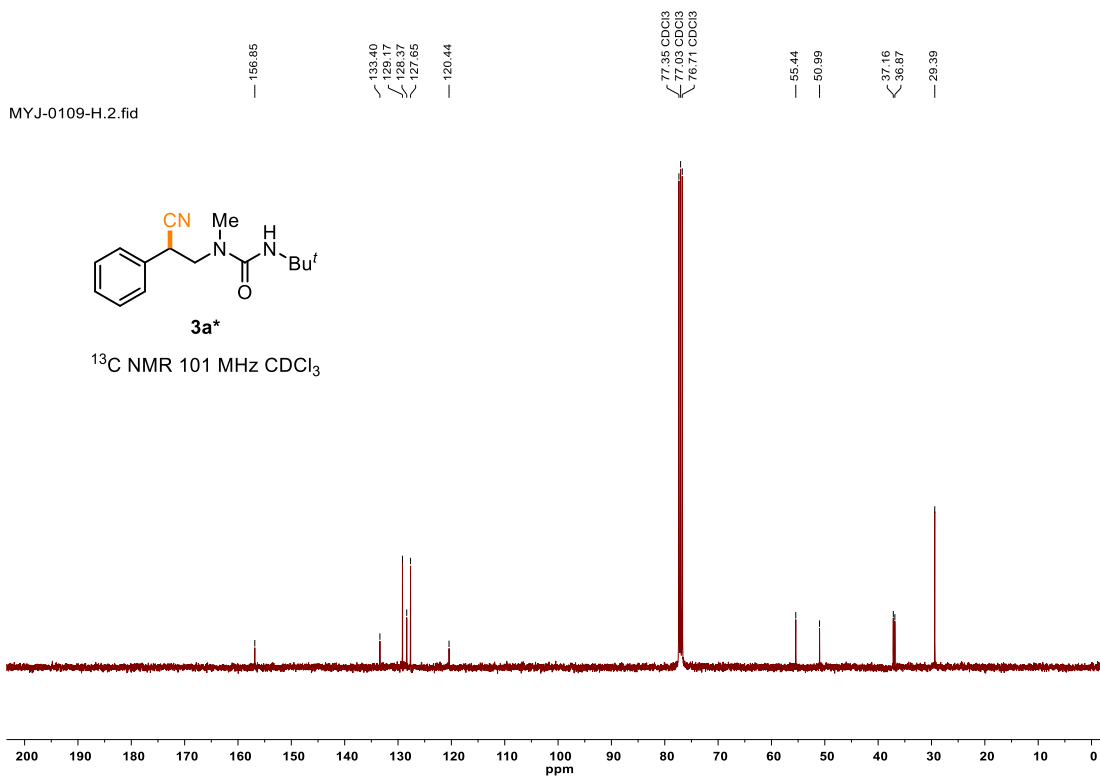

MYJ-0109-p-Me.1.fid

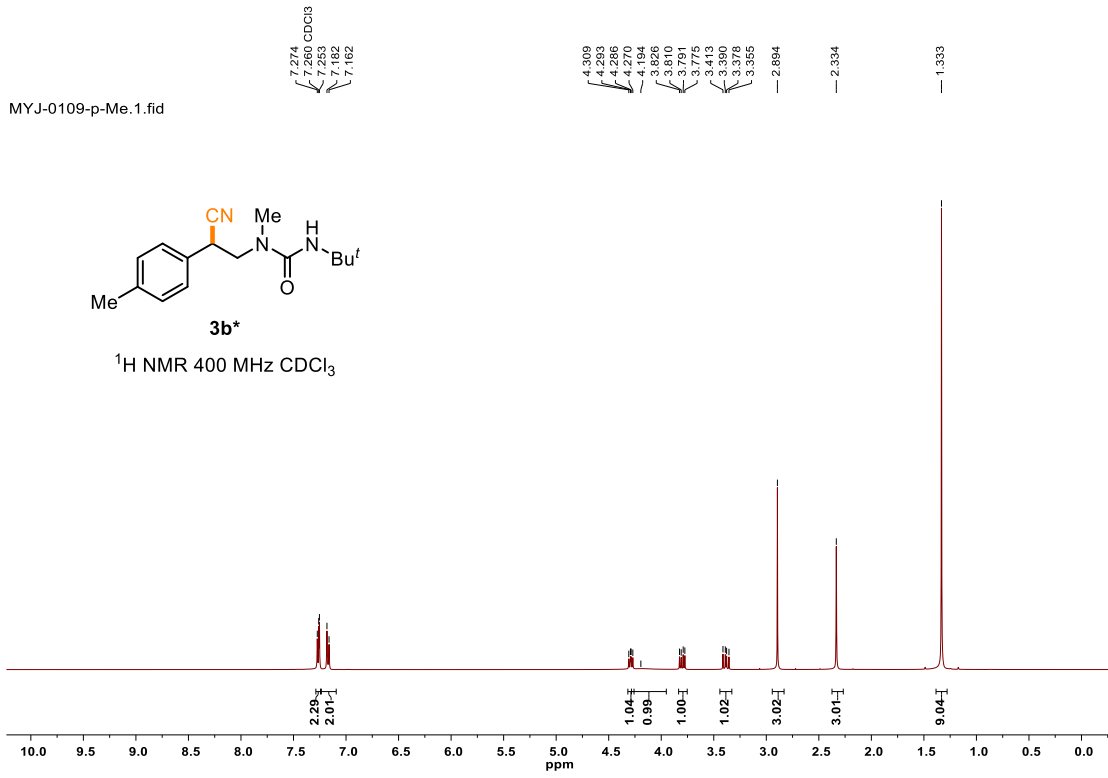

MYJ-0109-p-Me.2.fid

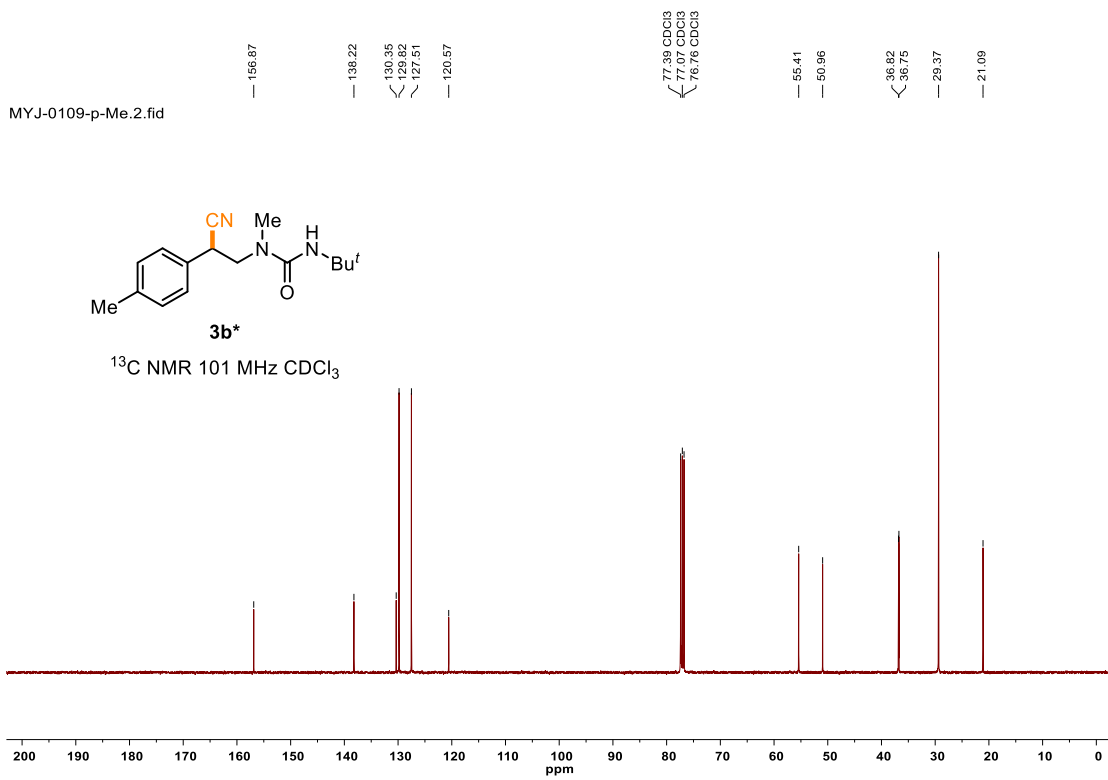

MYJ-0109-p-OMe.1.fid

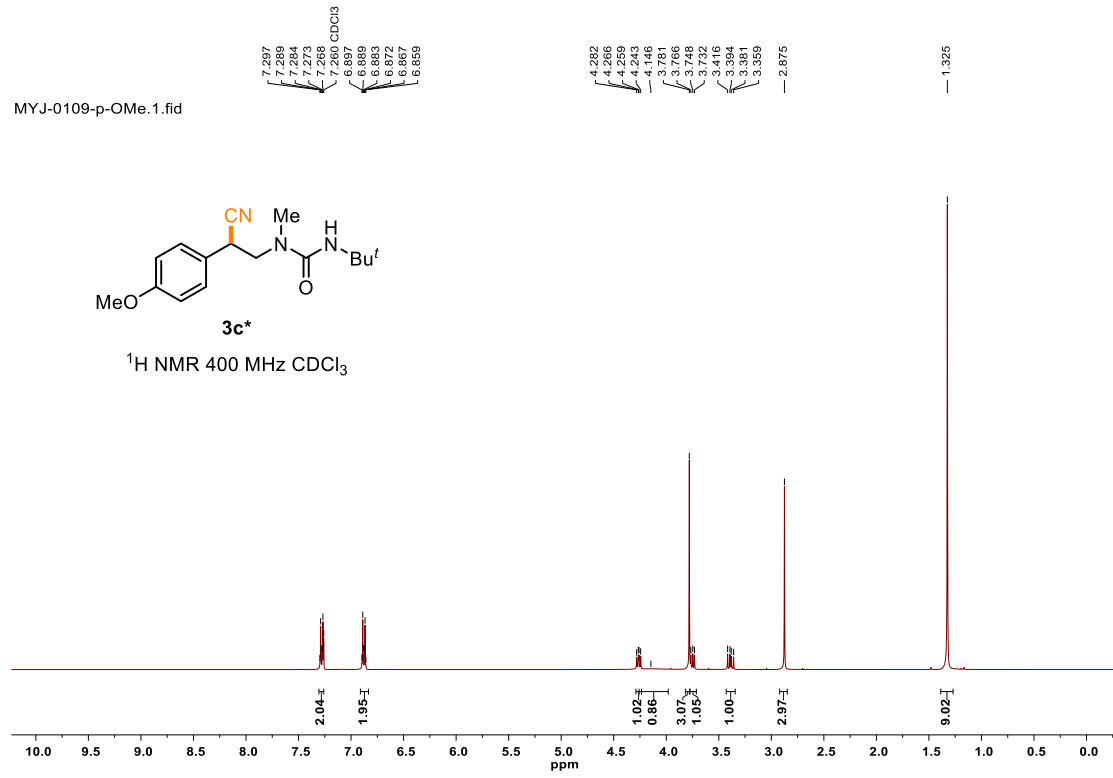

MYJ-0109-p-OMe.2.fid

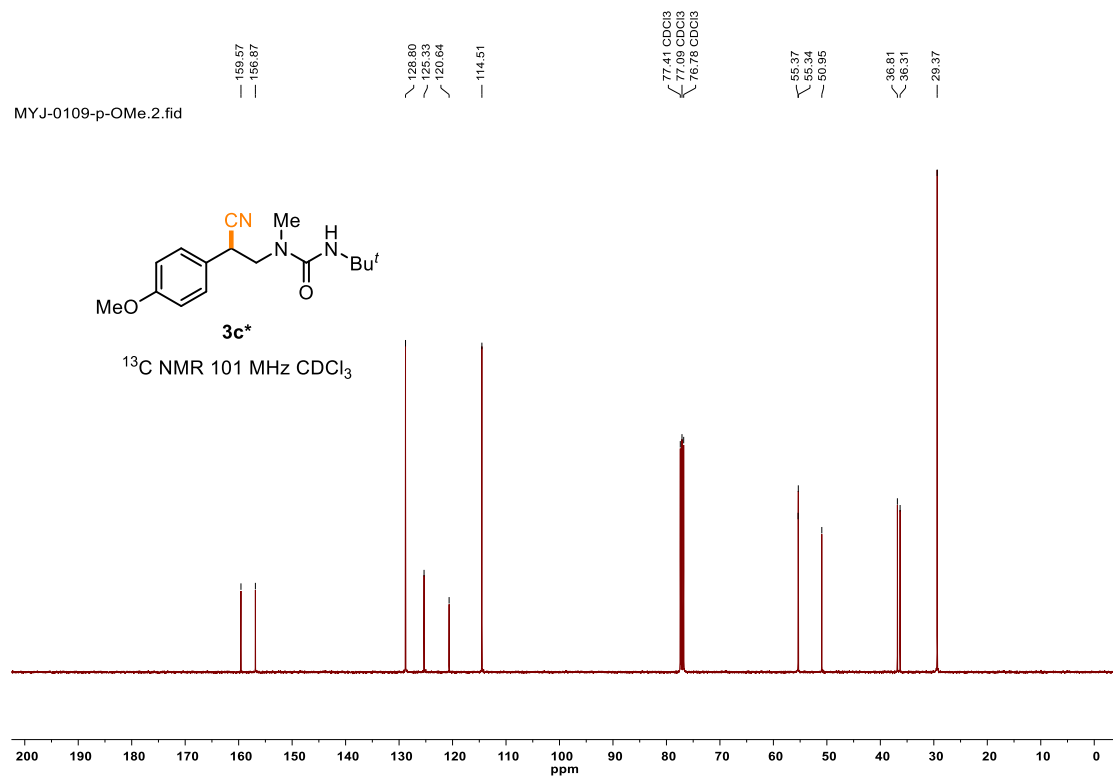

MYJ-0103-p-Ph.1.fid

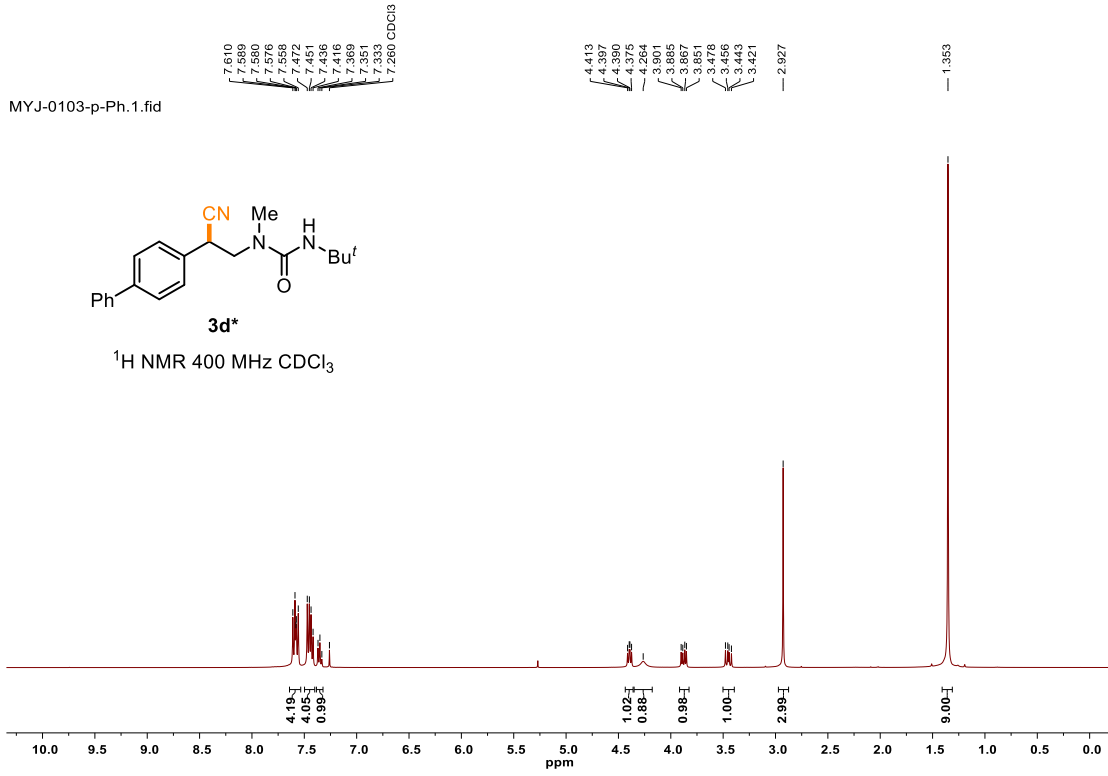

MYJ-0103-p-Ph.2.fid

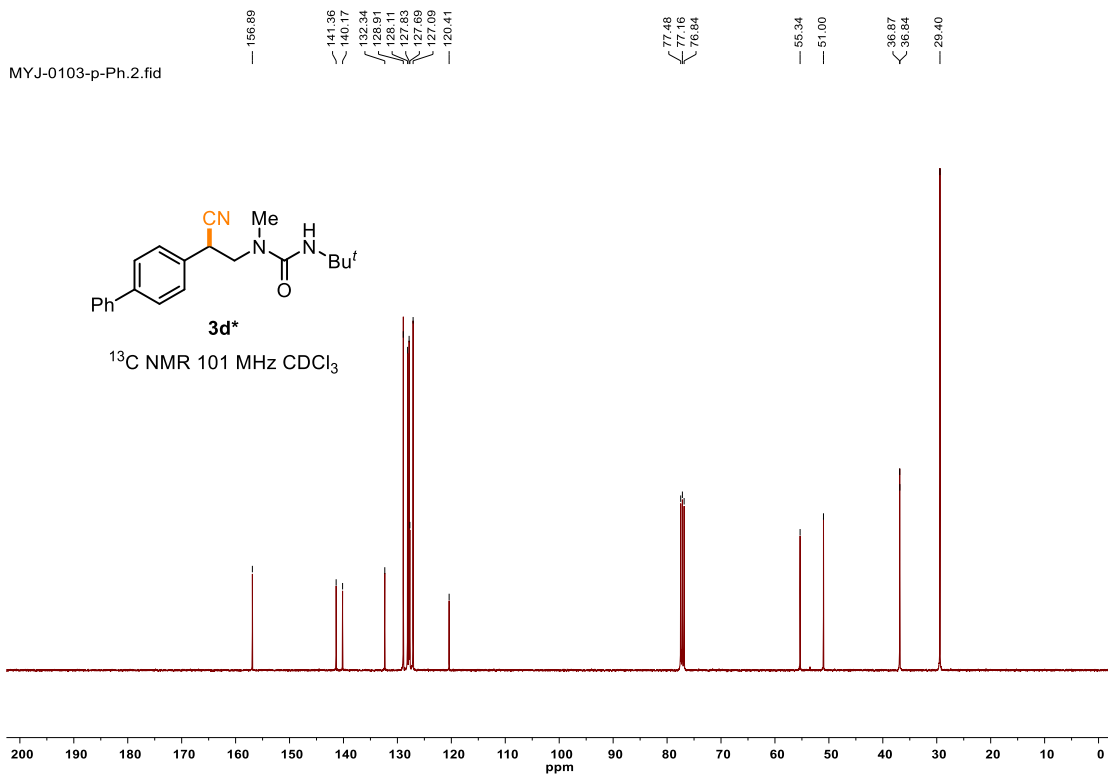

MYJ-0103-p-F.1.fid

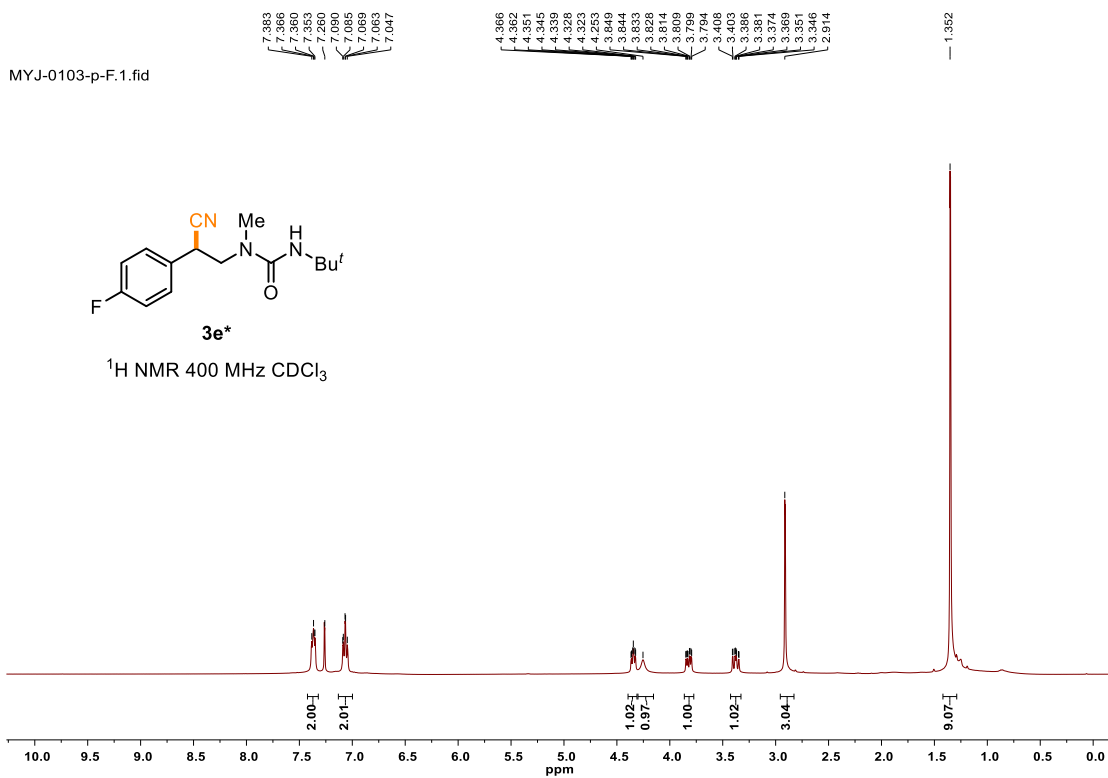

MYJ-0103-p-F.2.fid

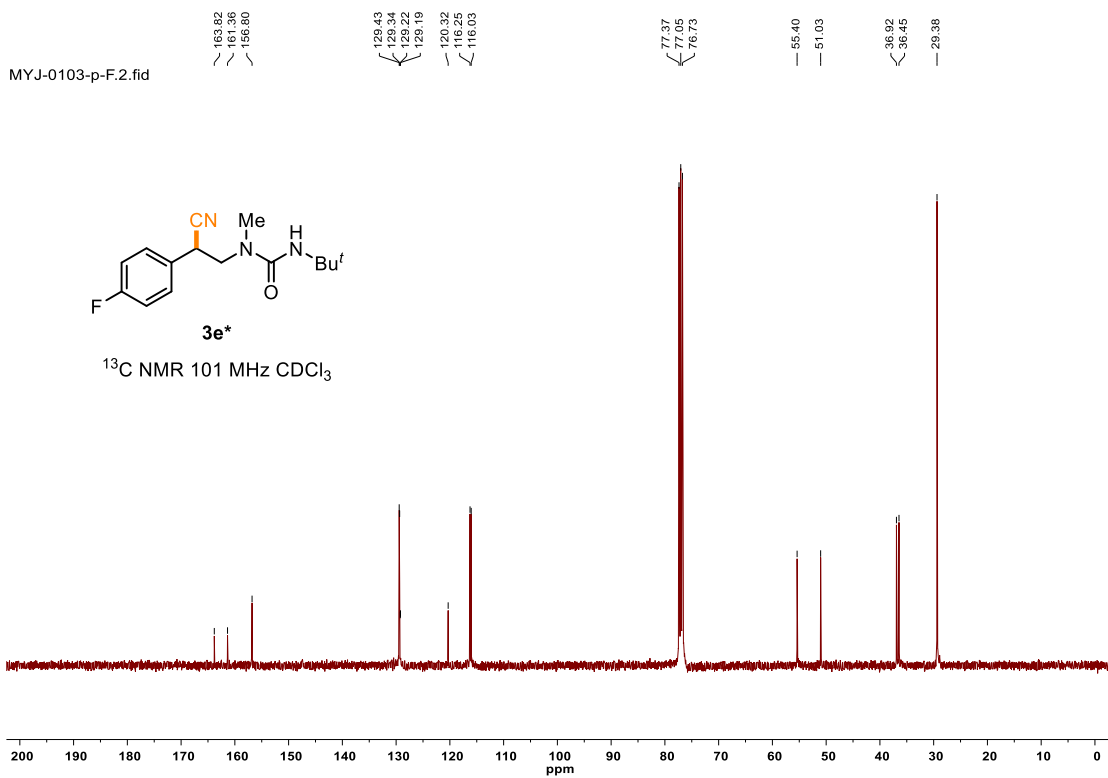

MYJ-0103-p-F.4.fid

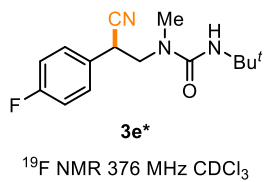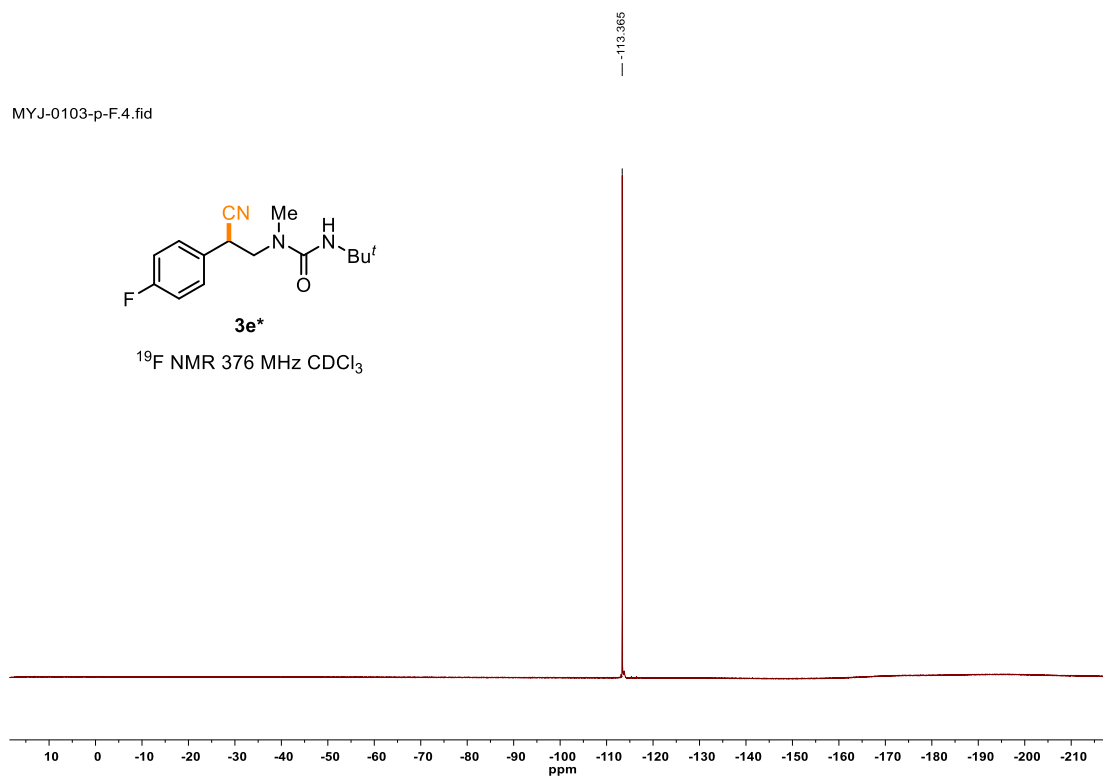

MYJ-0109-p-Cl.1.fid

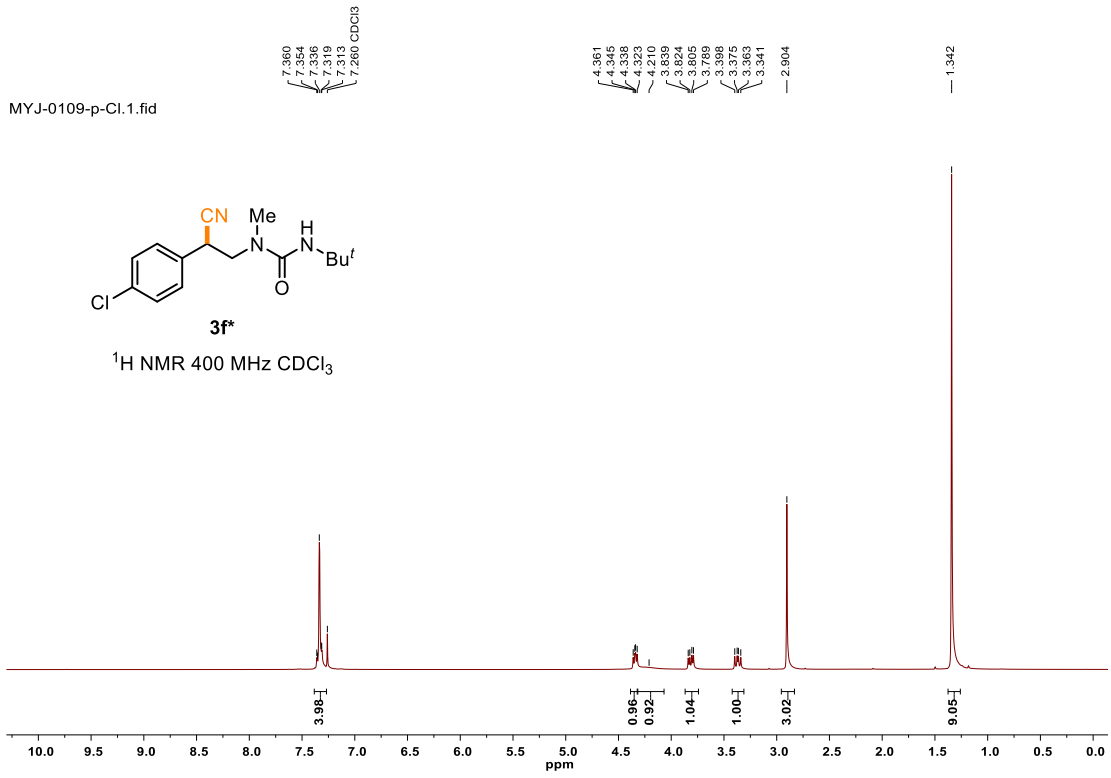

MYJ-0109-p-Cl.2.fid

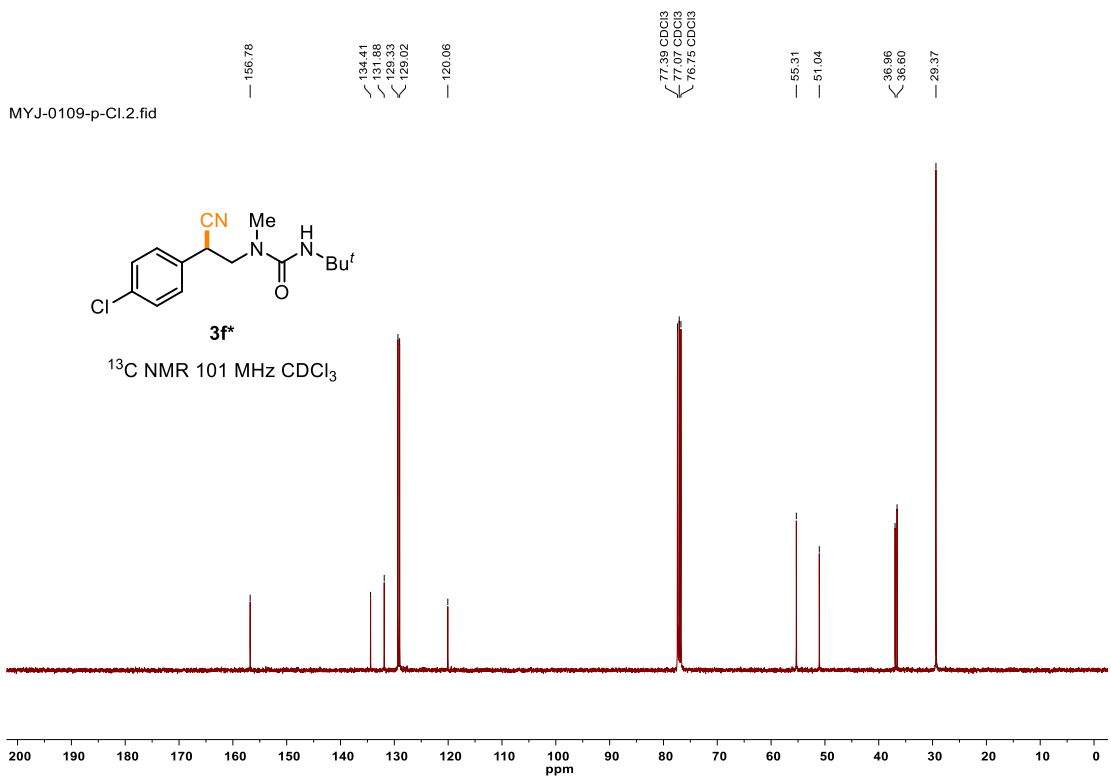

MYJ-0216-p-Br.1.fid

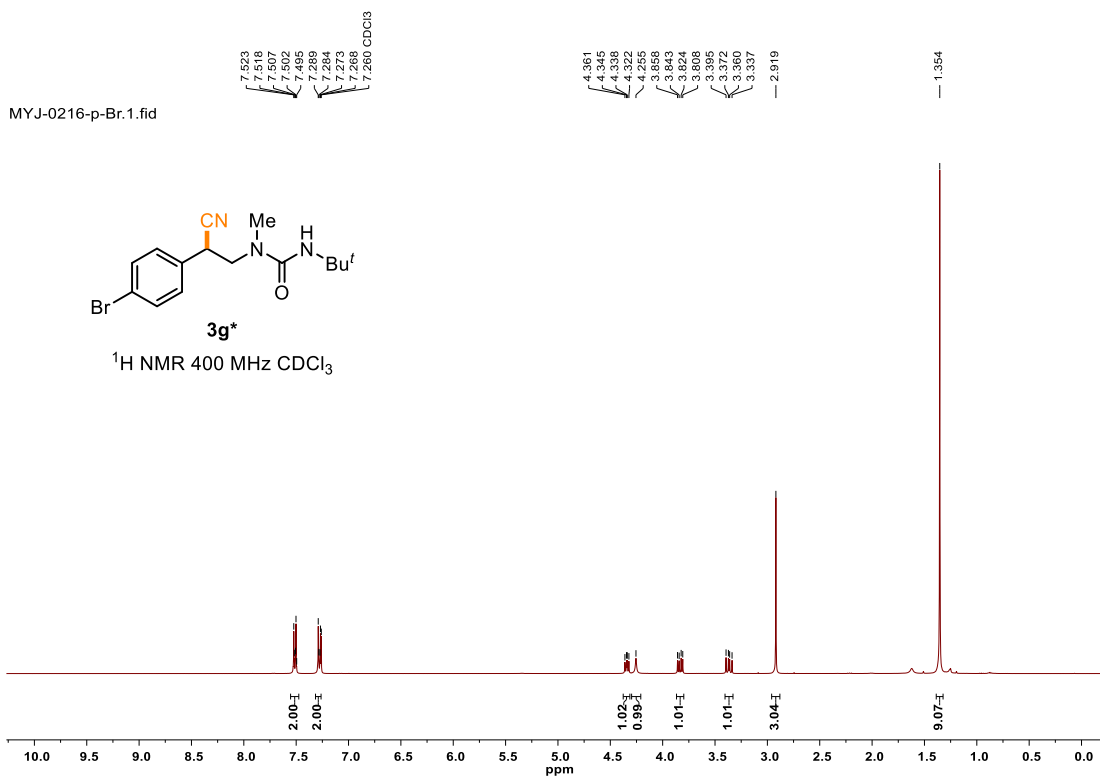

MYJ-0216-p-Br.2.fid

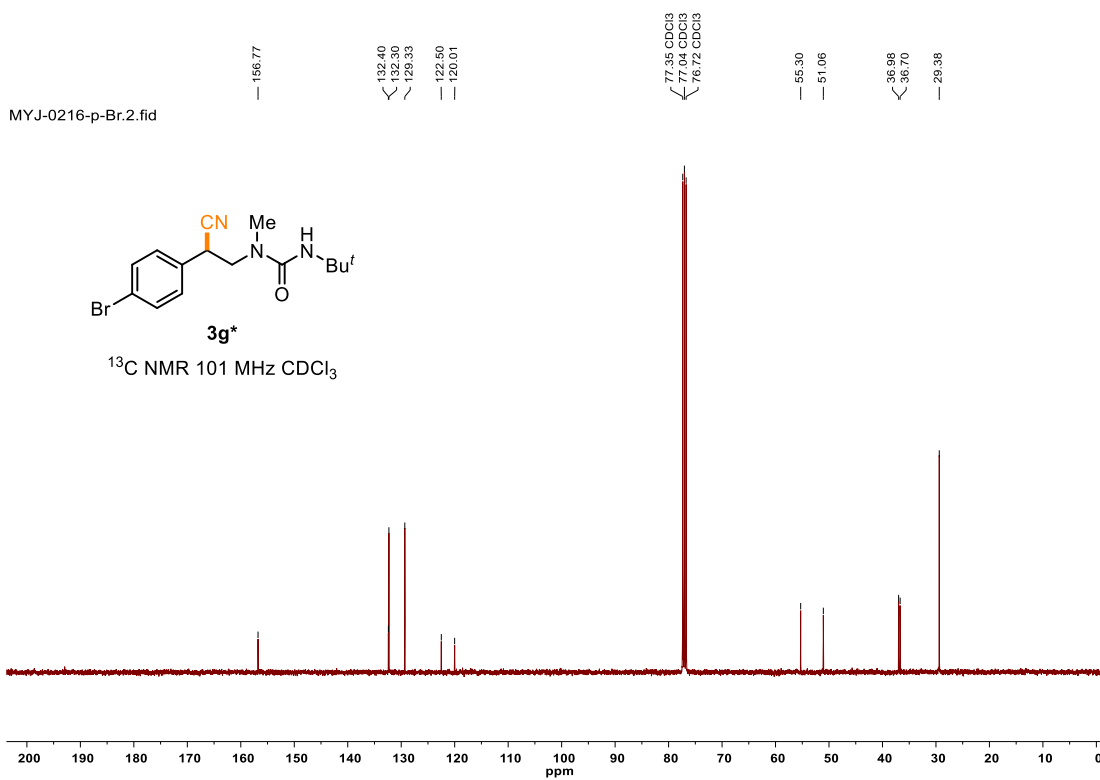



MYJ-0103-p-CF3.1.fid

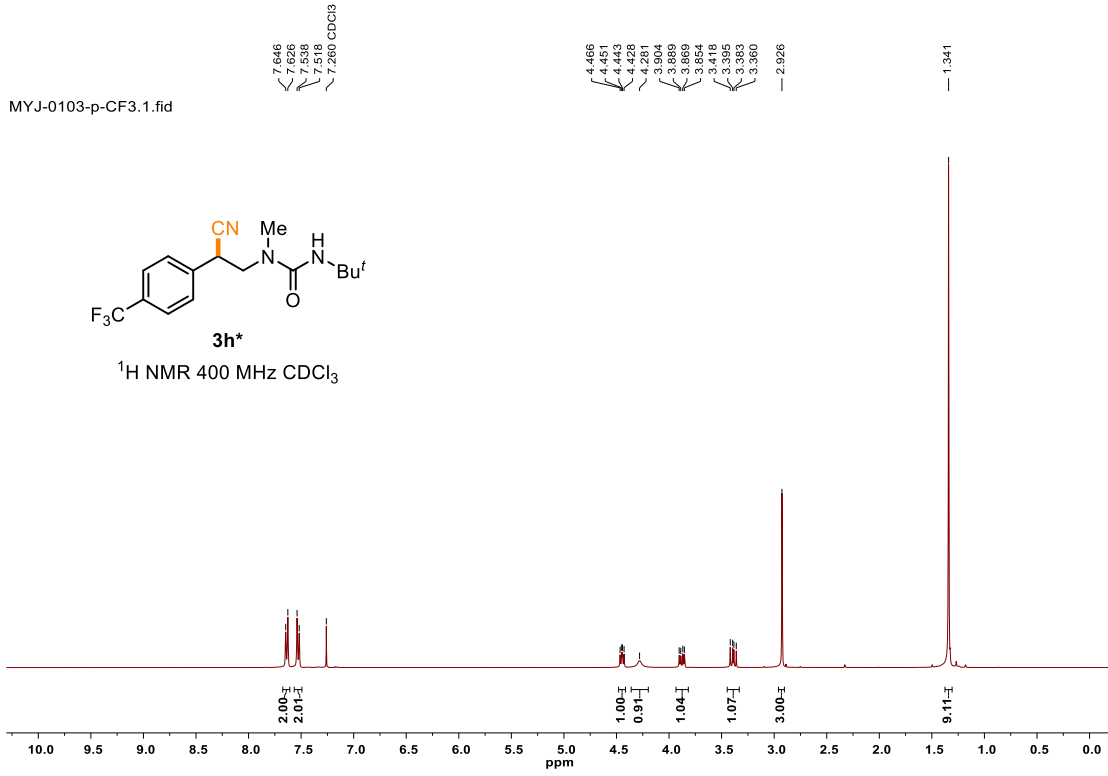

MYJ-0103-p-CF3.2.fid

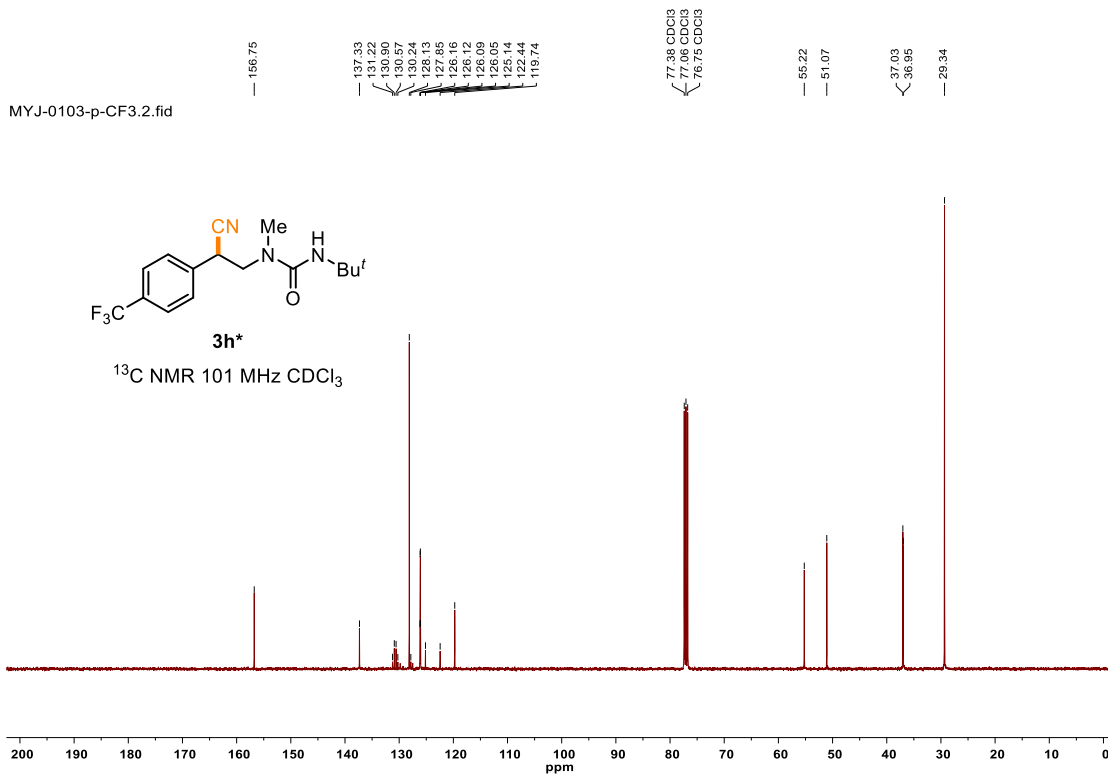

MYJ-0103-p-CF3.4.fid

— 62.710

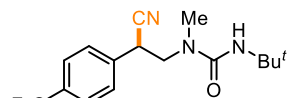

**3h\***

<sup>19</sup>F NMR 376 MHz CDCl<sub>3</sub>

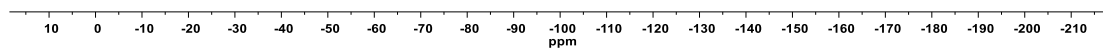

MYJ-H-NMR-1010-3.1.fid

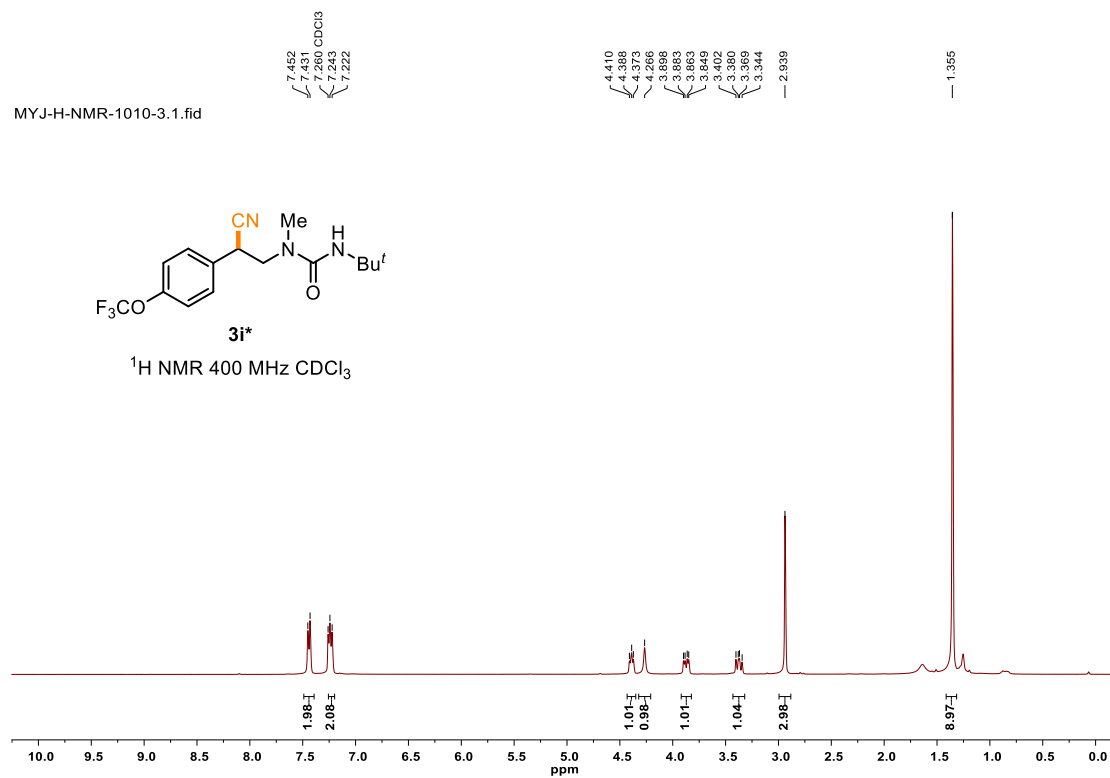

MYJ-C-NMR-1011-3.1.fid

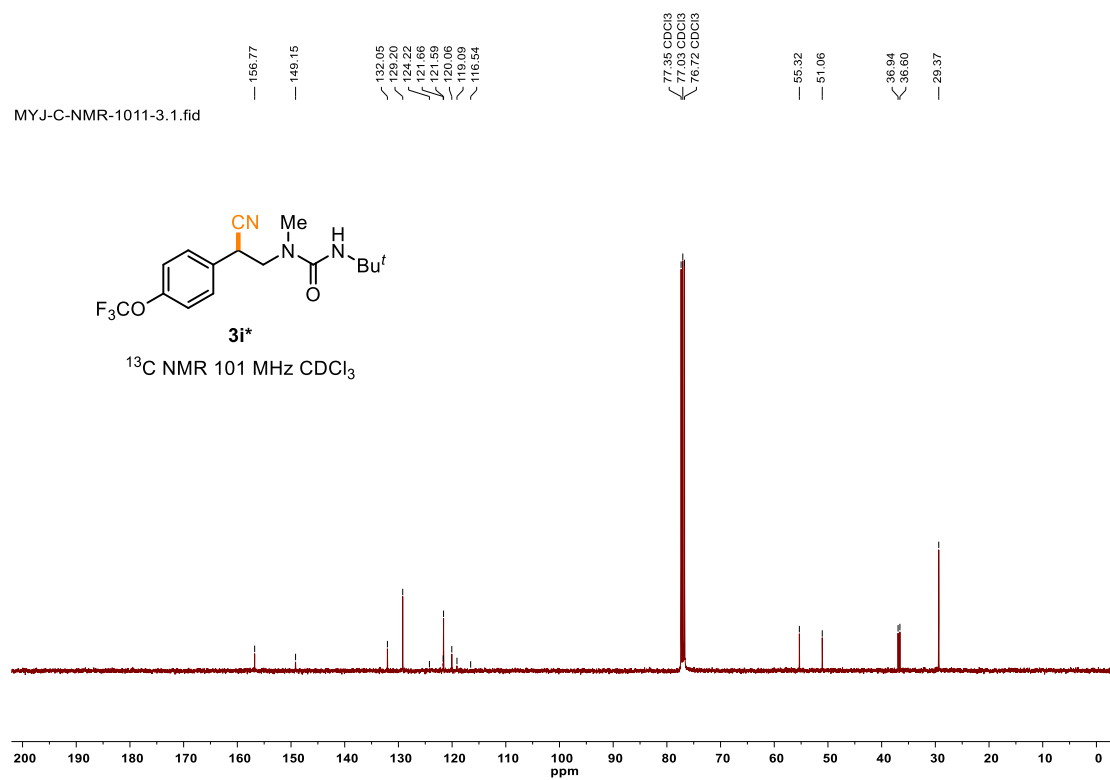

-57.907

h60nihcyQE6Jdv+53pA6uQ.90800227.fid  
MYJ-0909-beta-p-OCF3 CDCl3 0910

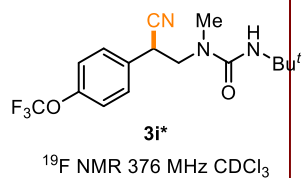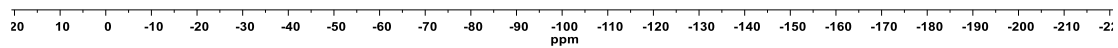

MYJ-0216-m-F.1.fid

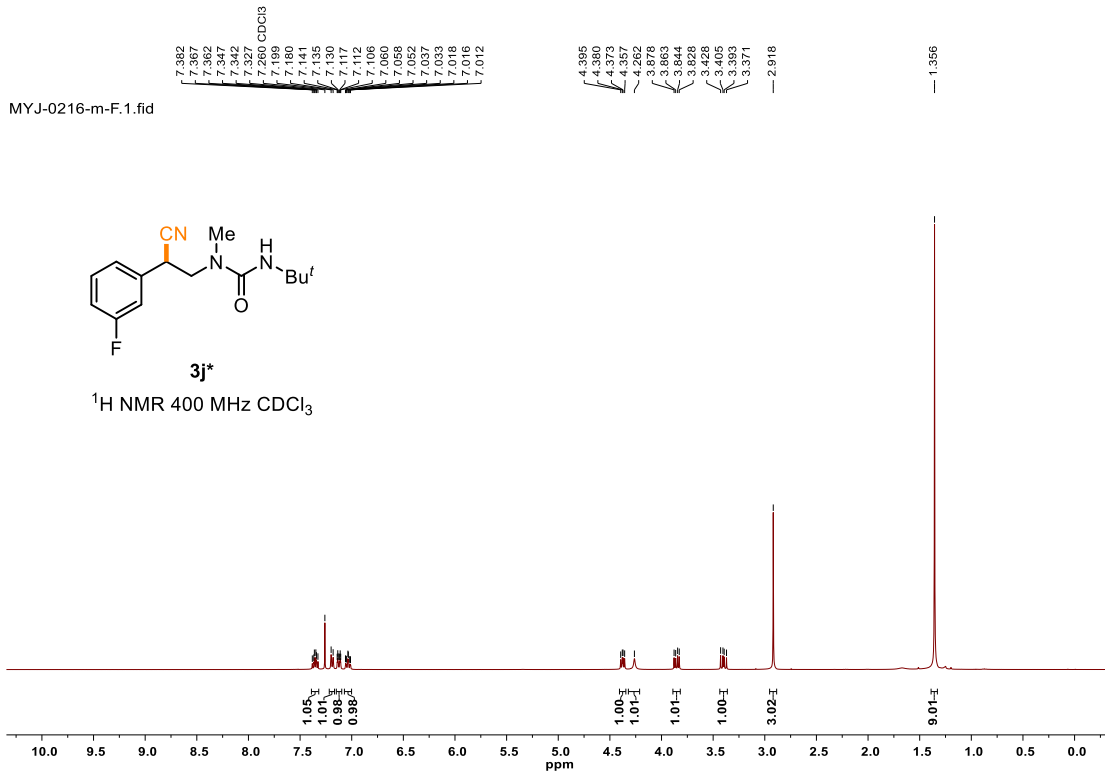

MYJ-0216-m-F.2.fid

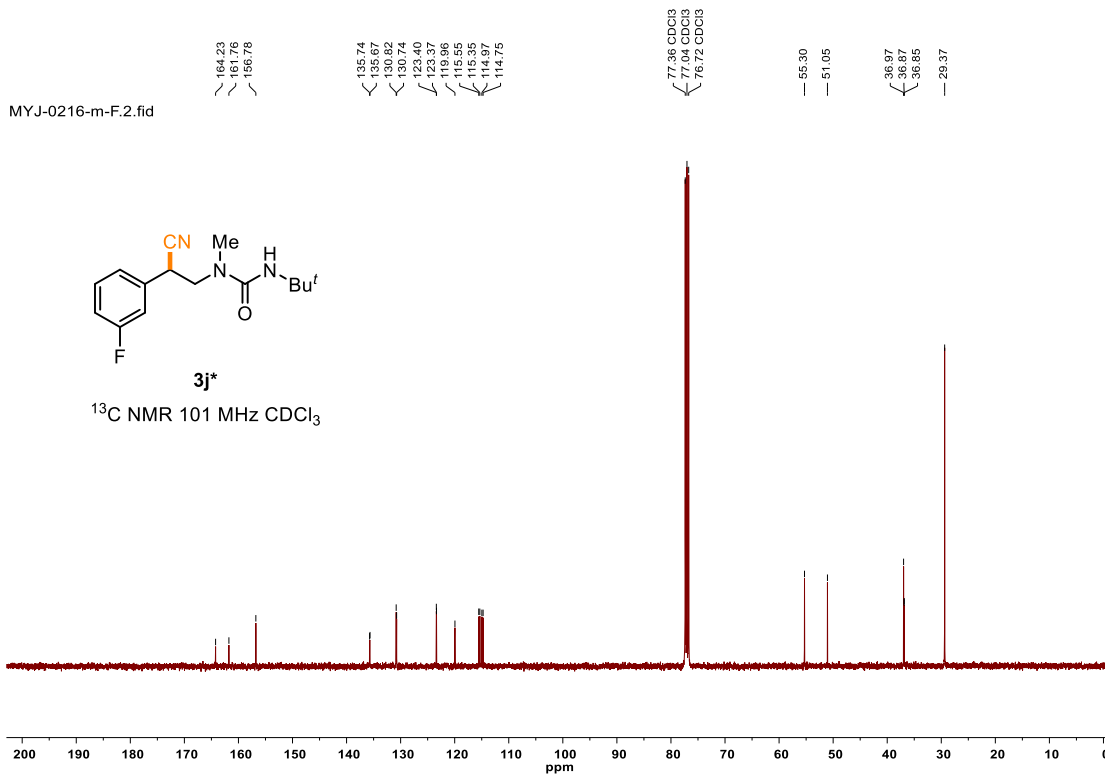

MYJ-0216-m-F.3.fid

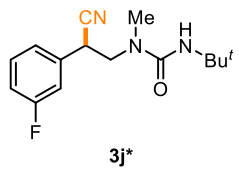

<sup>19</sup>F NMR 376 MHz CDCl<sub>3</sub>

-111.526

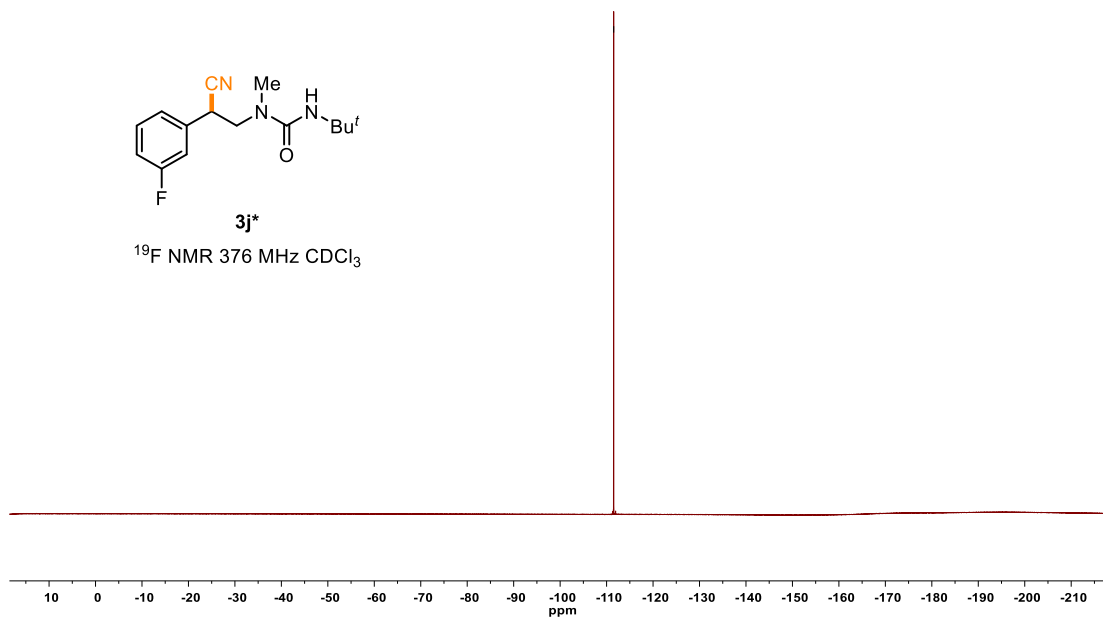

MYJ-0109-m-Cl.3.fid

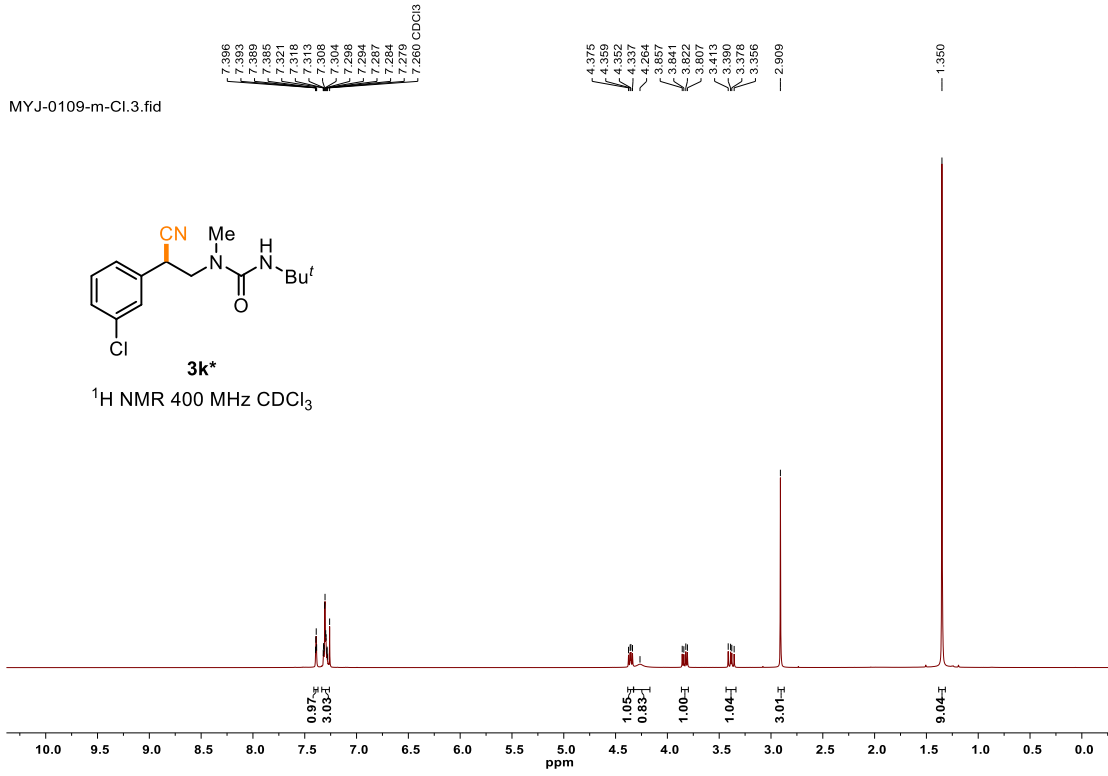

MYJ-0109-m-Cl.2.fid

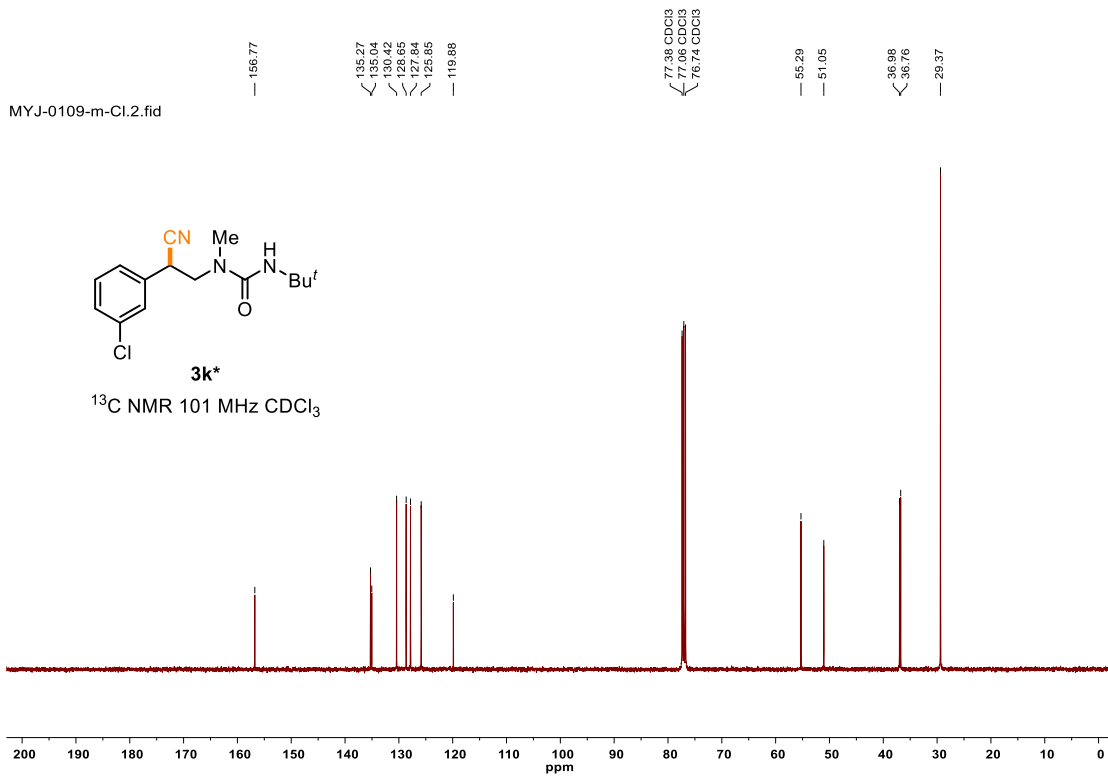

MYJ-0103-m-CF3.1.fid

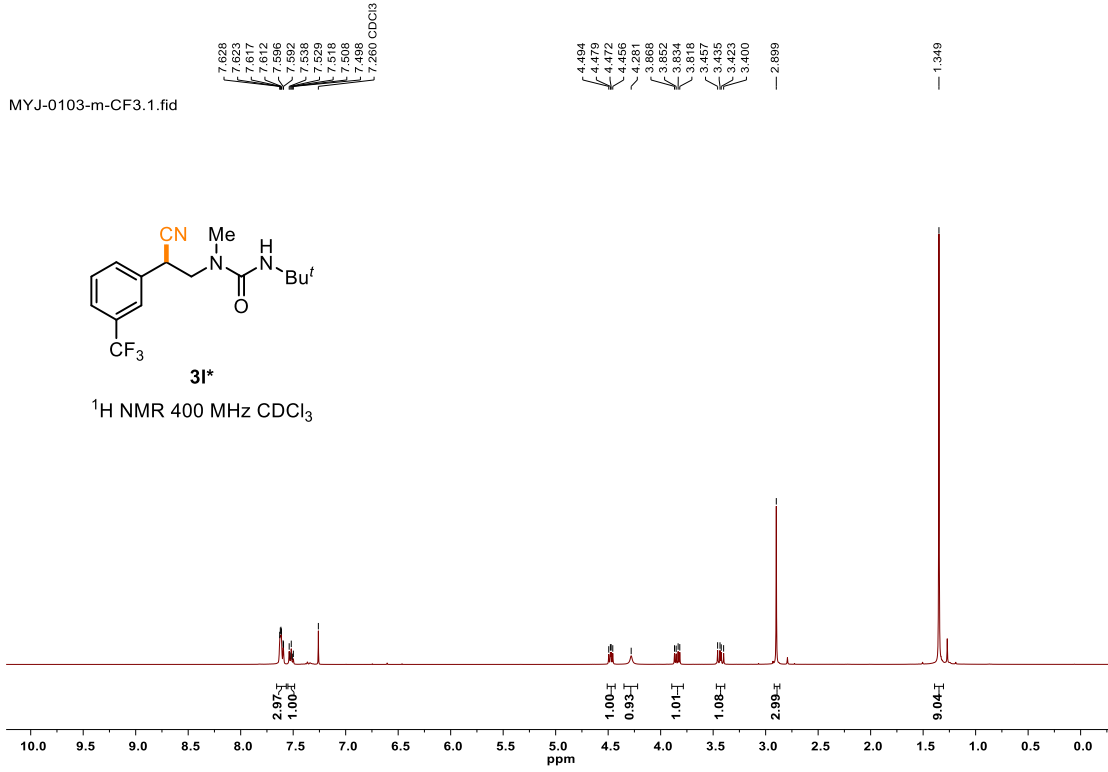

MYJ-0103-m-CF3.2.fid

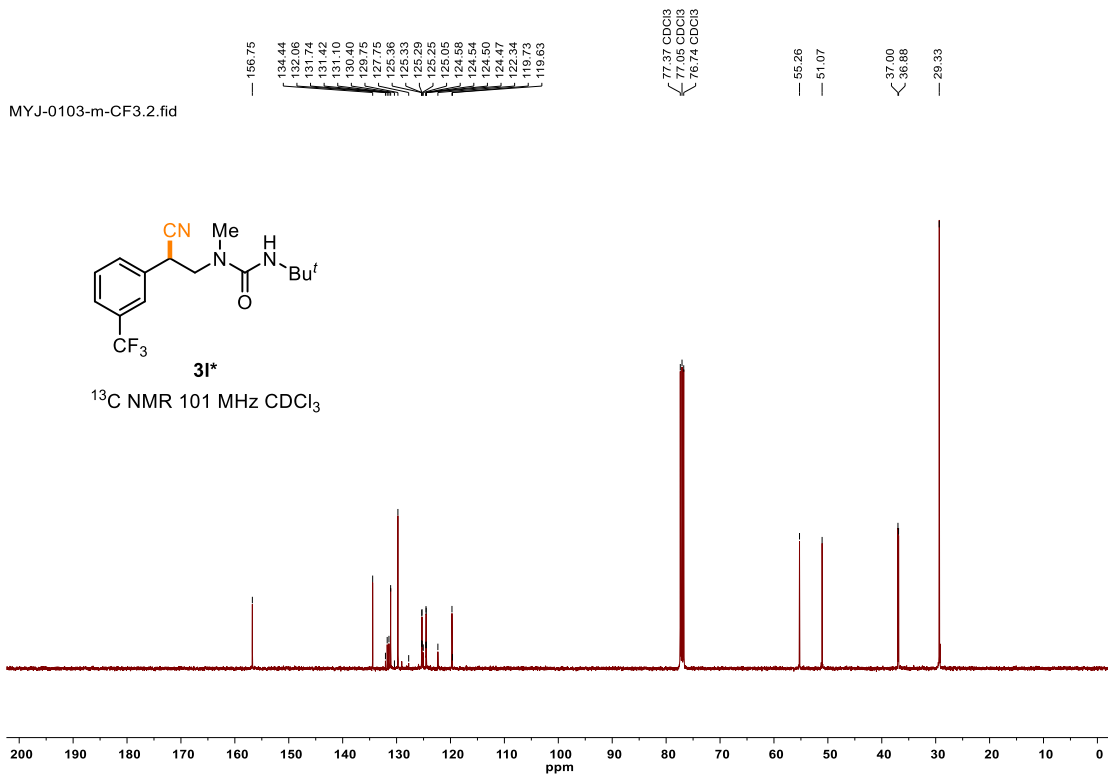



MYJ-0103-m-CF3.4.fid

— 62.638

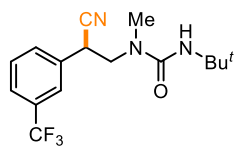

<sup>19</sup>F NMR 376 MHz CDCl<sub>3</sub>

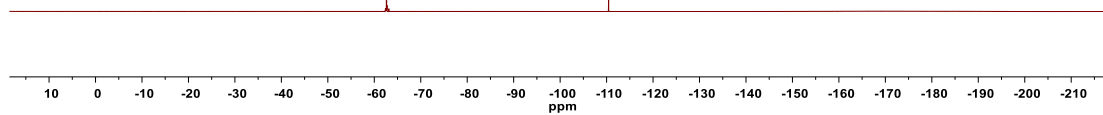

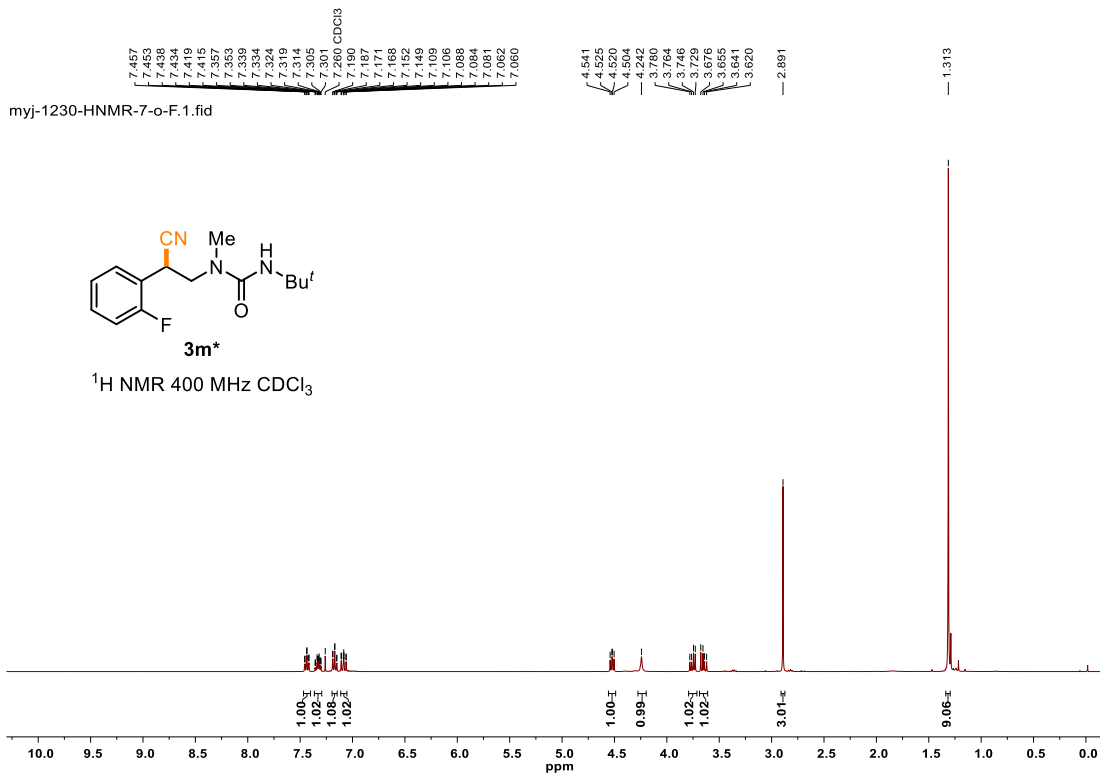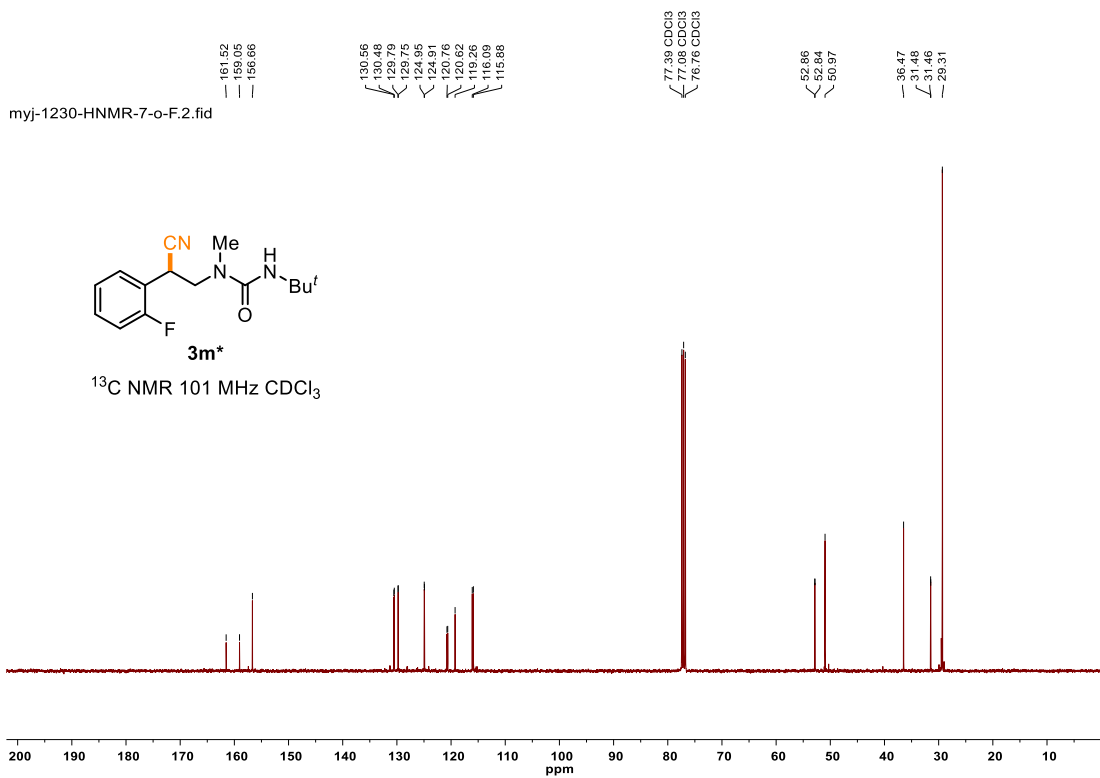

h60nihcyQE6Jdv+53pA6uQ.90800228.fid  
MYJ-0909-beta-o-F CDCl3 0910

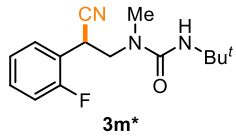

<sup>19</sup>F NMR 376 MHz CDCl<sub>3</sub>

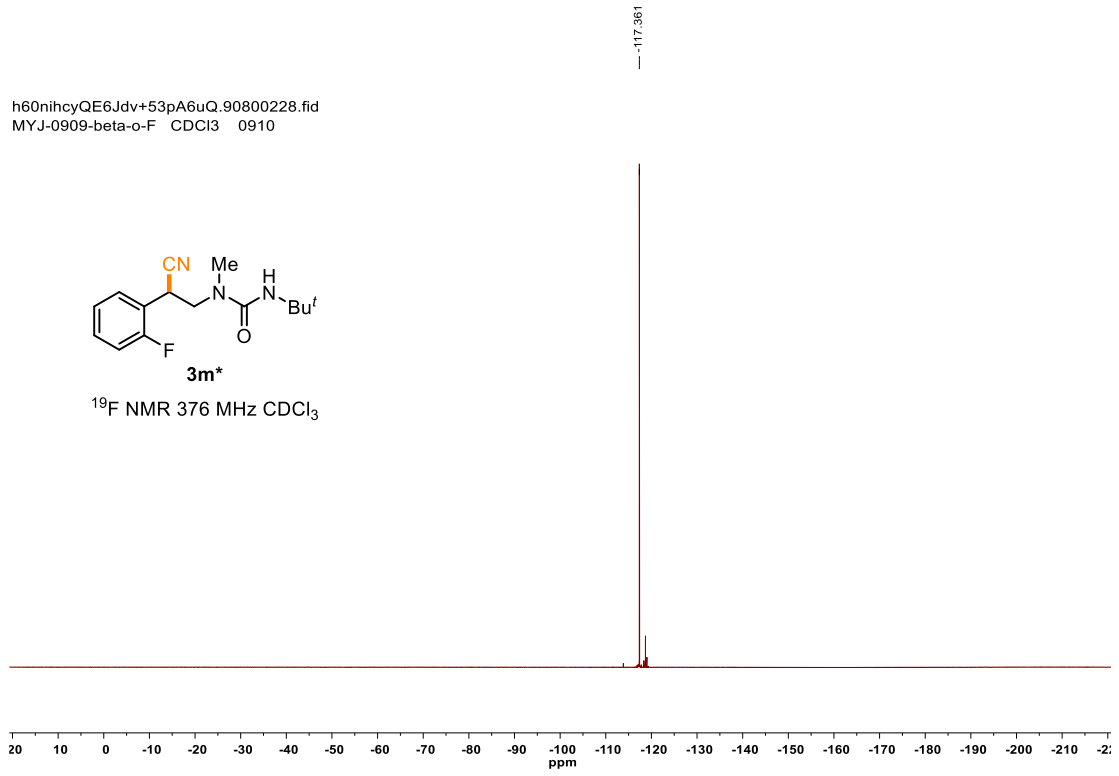

MYJ-0103-Naphth.1.fid

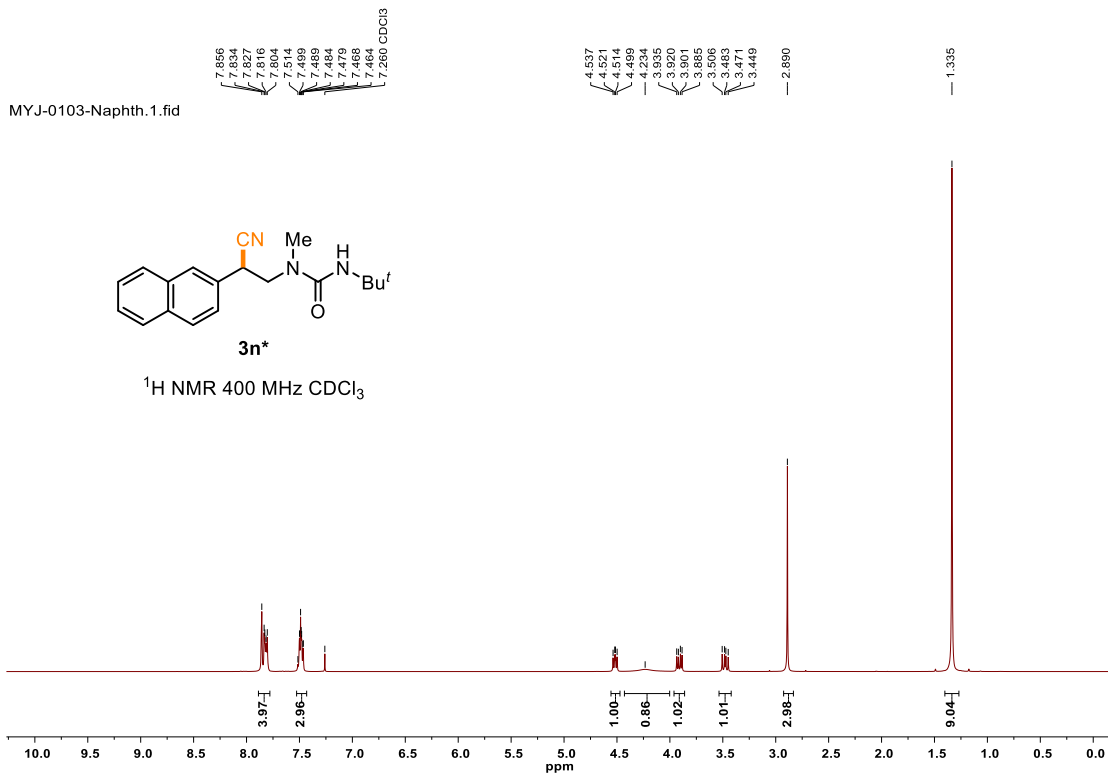

MYJ-0103-Naphth.2.fid

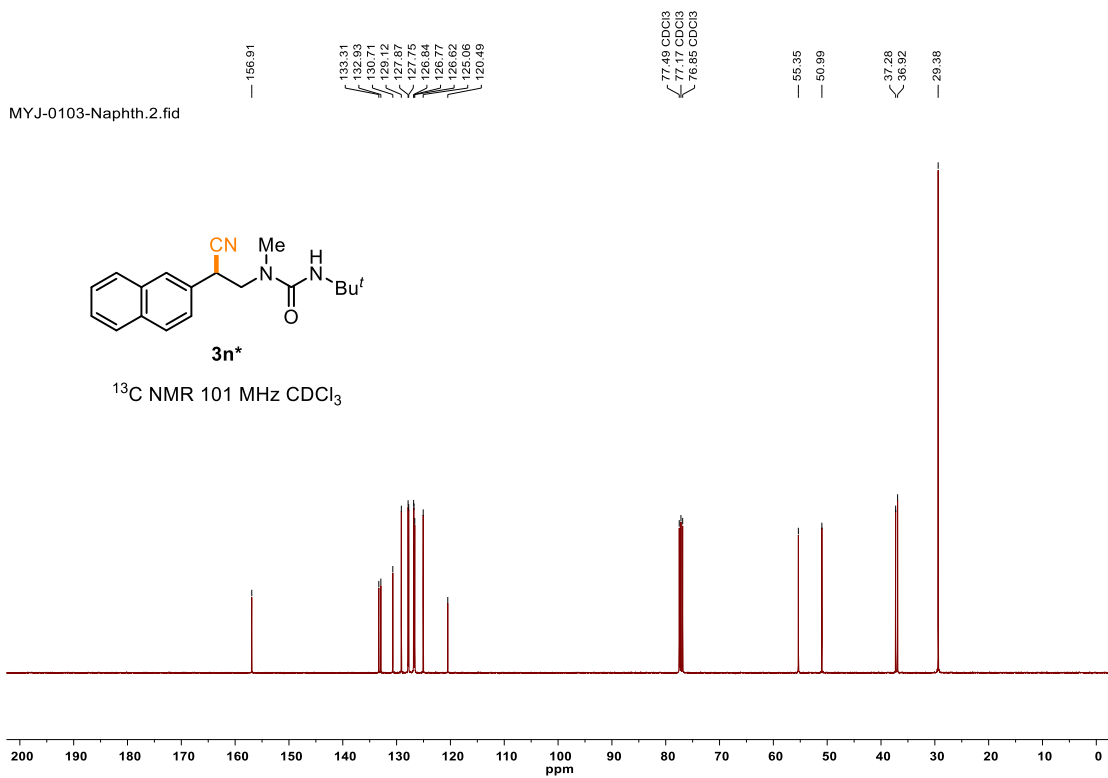

MYJ-0103-cyclodiO.1.fid

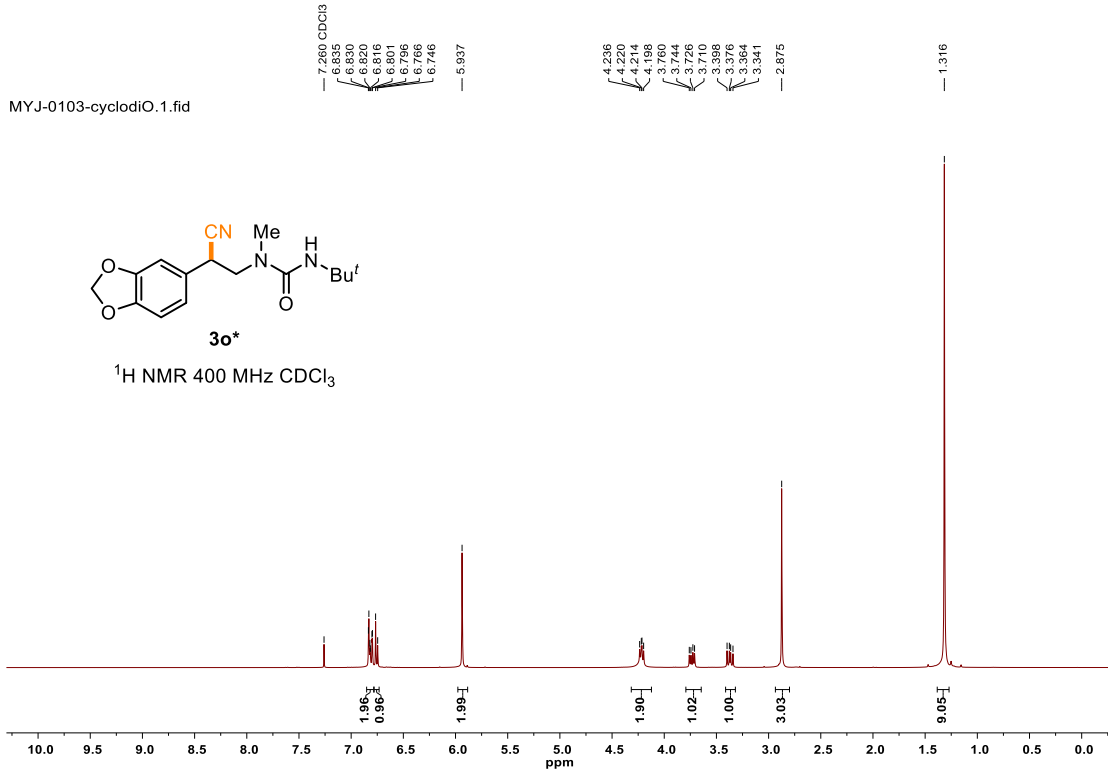

MYJ-0103-cyclodiO.2.fid

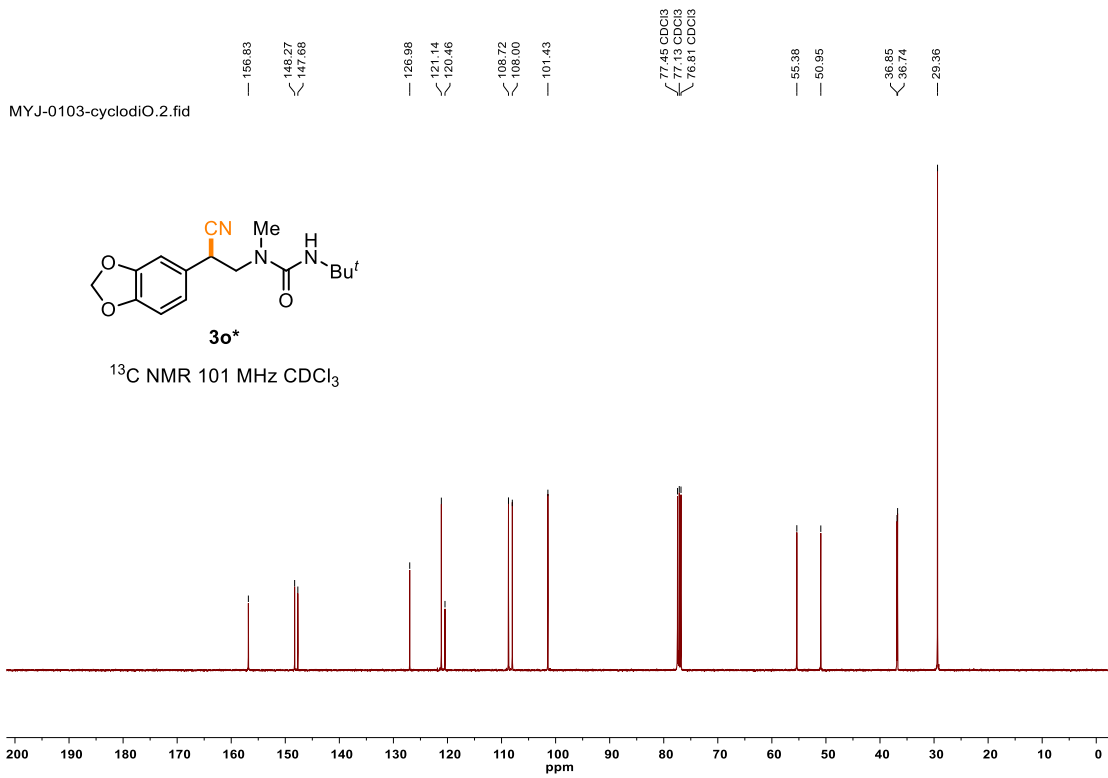

MYJ-H-NMR-1010-2.1.fid

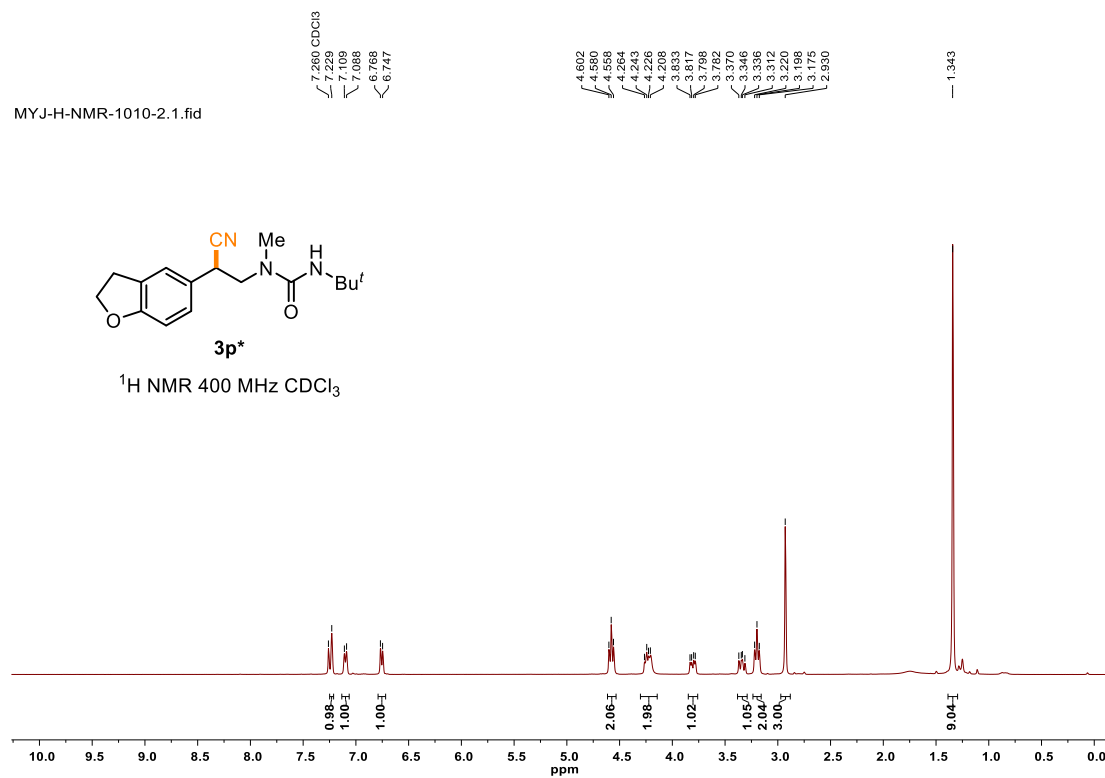

MYJ-C-NMR-1011-2.1.fid

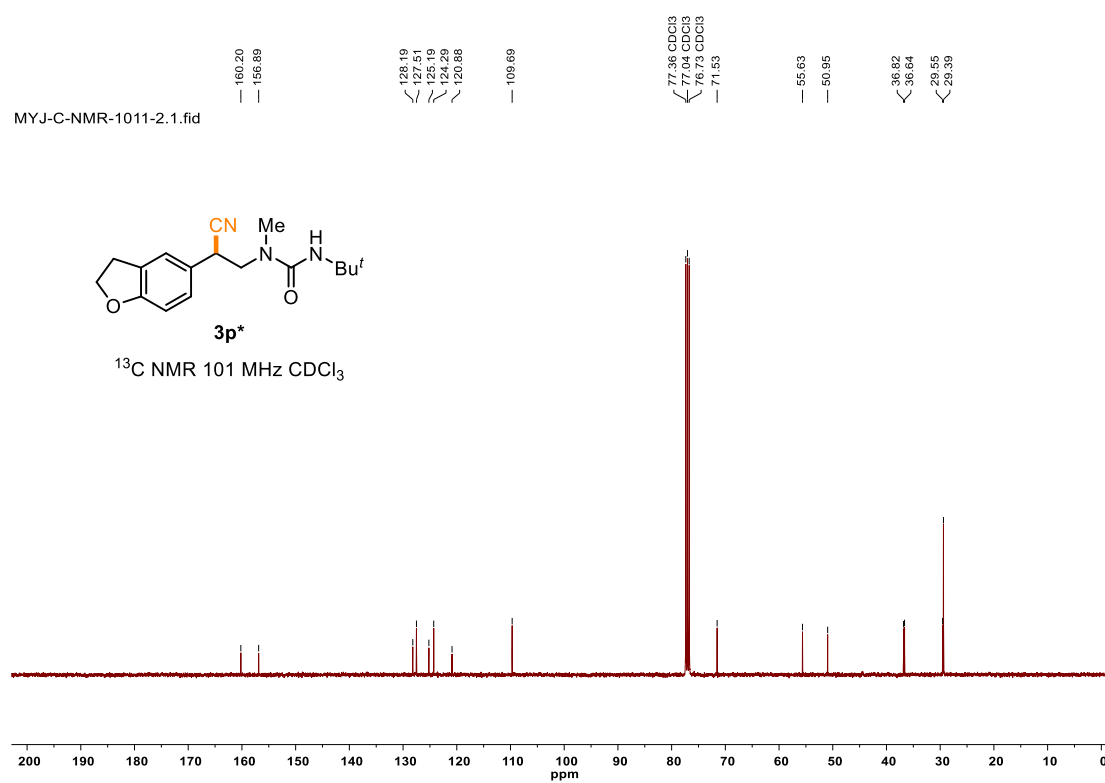

MYJ-3.12-diOMe.1.fid

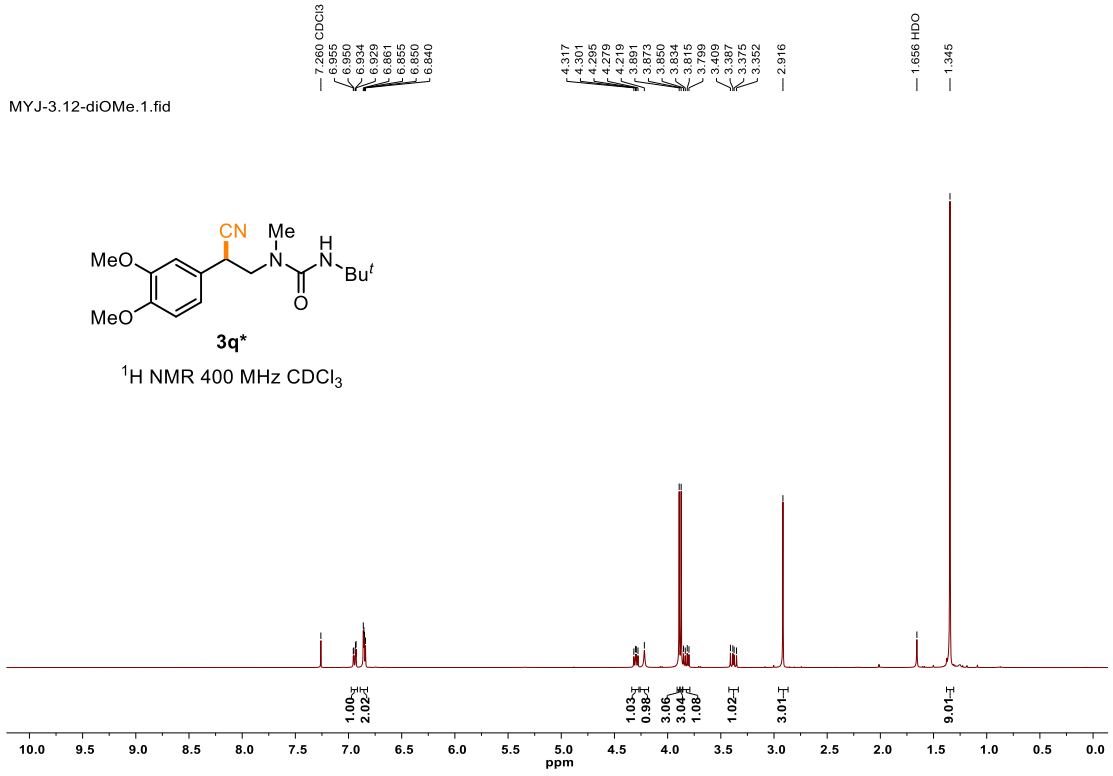

MYJ-3.12-diOMe.2.fid

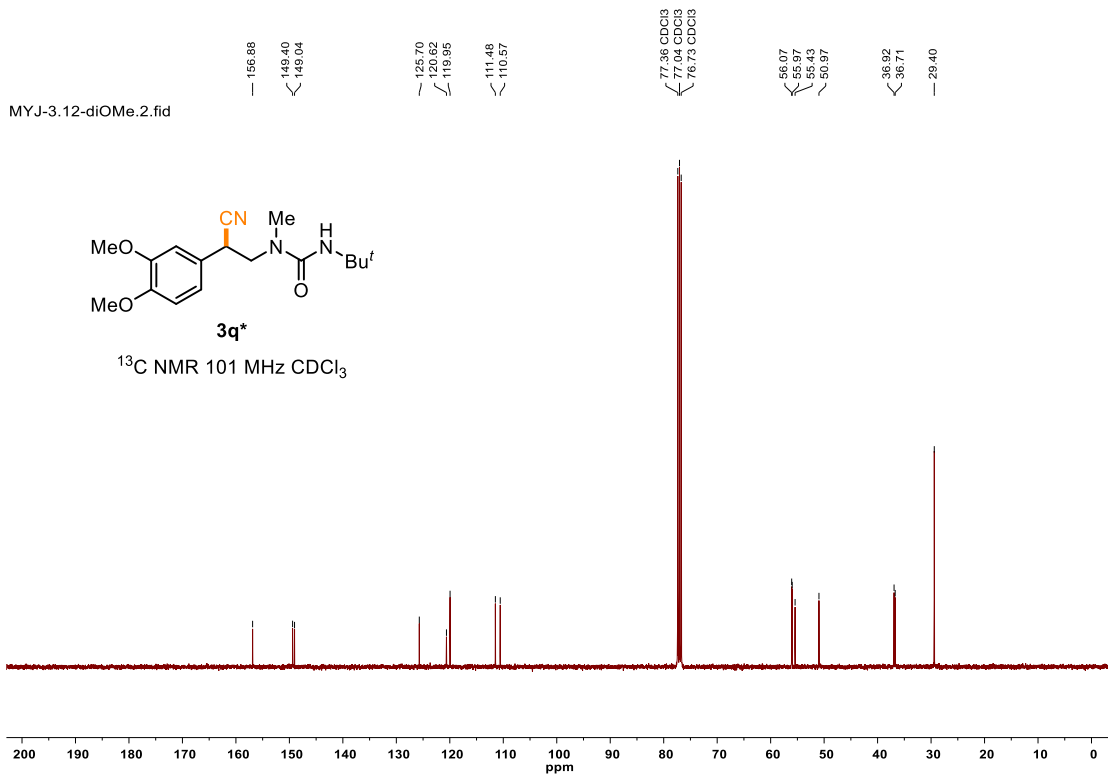

MYJ-0110-thiophene.1.fid

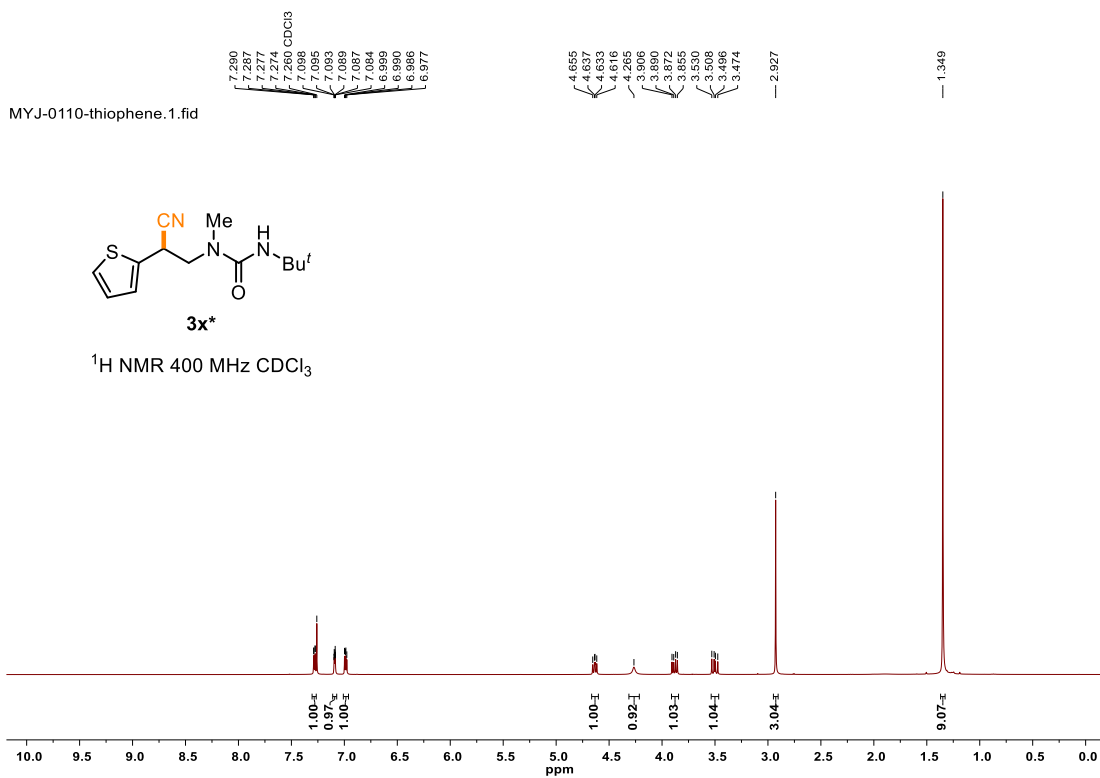

MYJ-0110-thiophene.2.fid

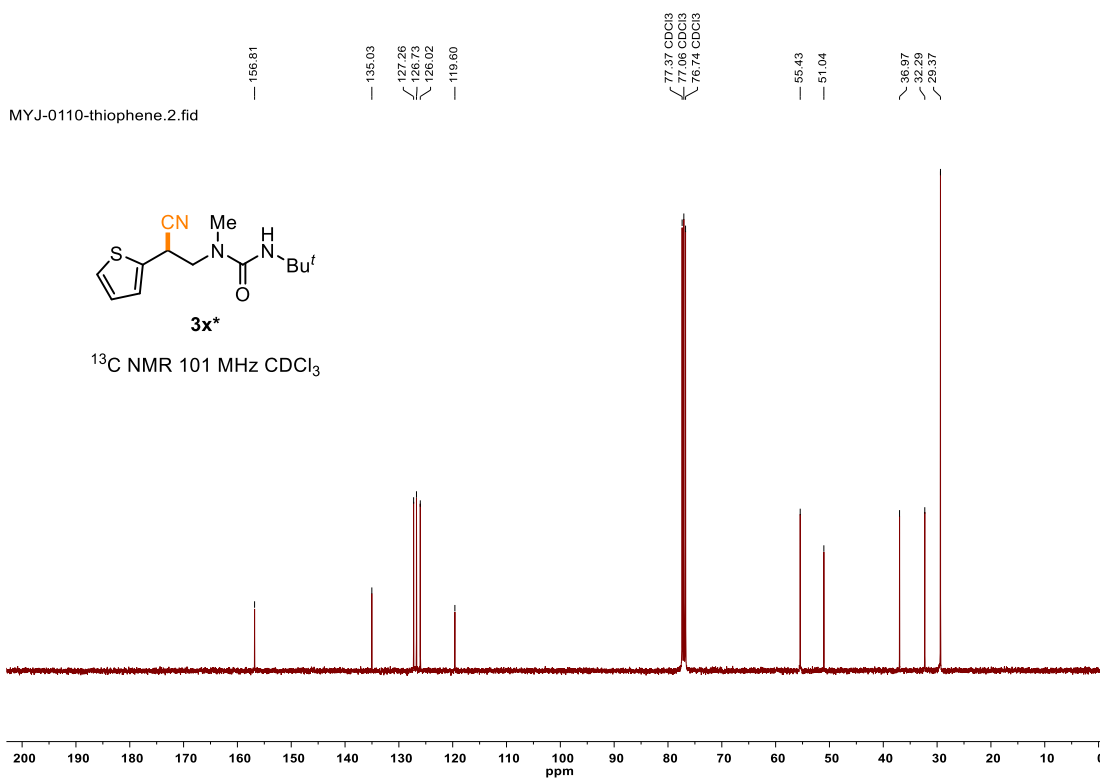



MYJ-H-NMR-1010-1.1.fid

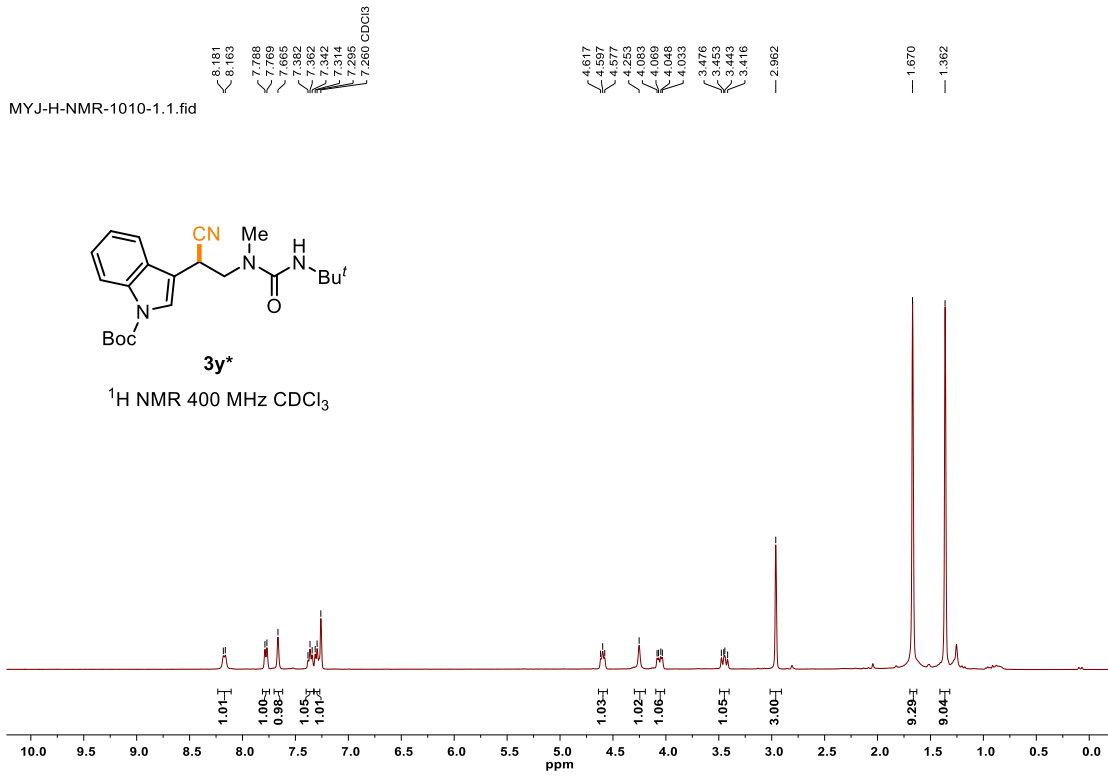

MYJ-C-NMR-1011-1.1.fid

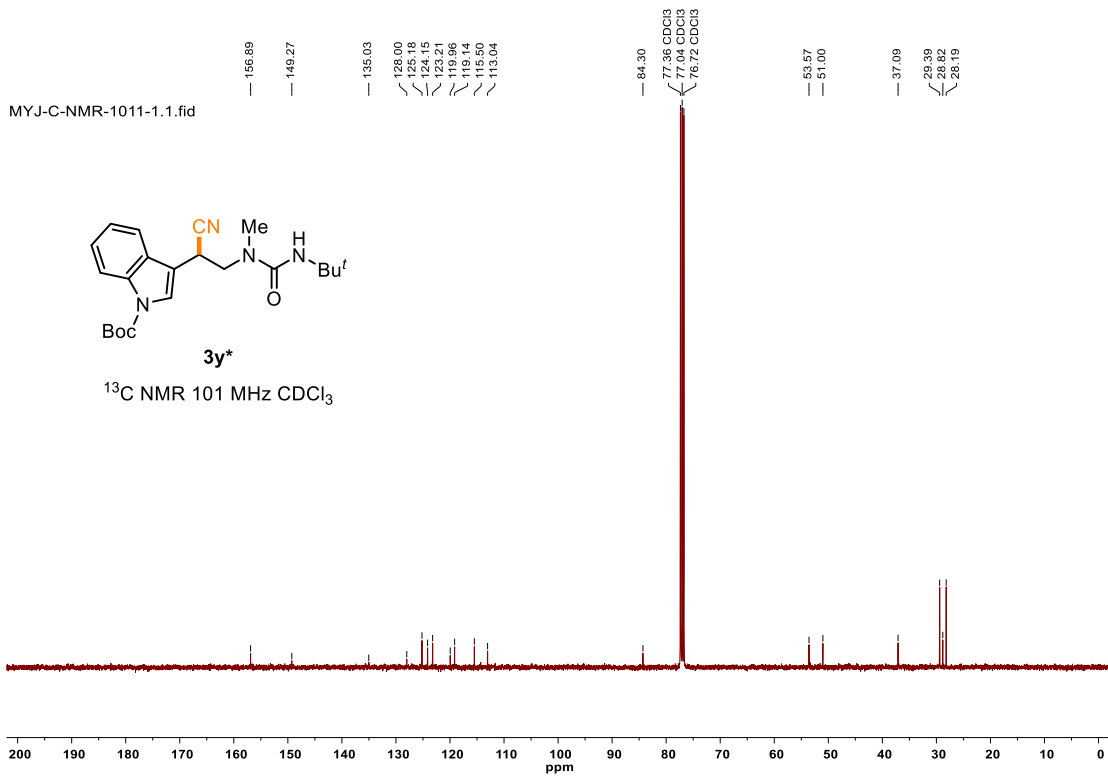

MYJ-HNMR-1.1.fid

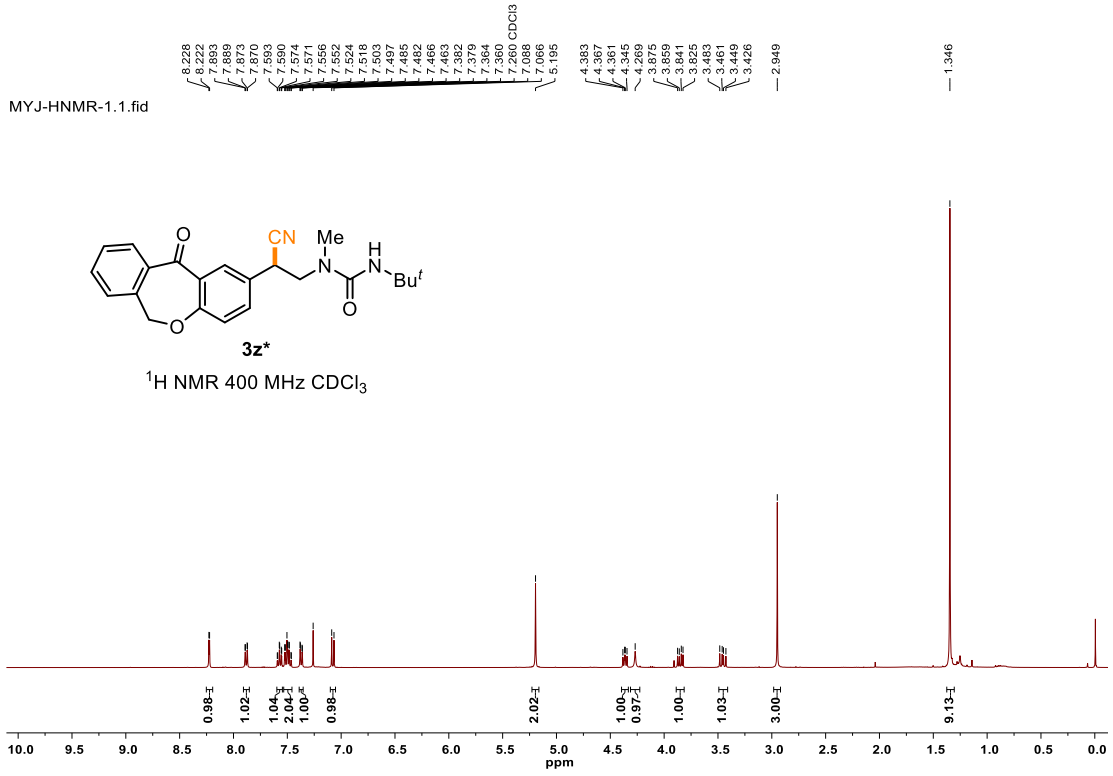

LHL-CNMR-1219-1-Ph-C=O-7-O-Ph.1.fid

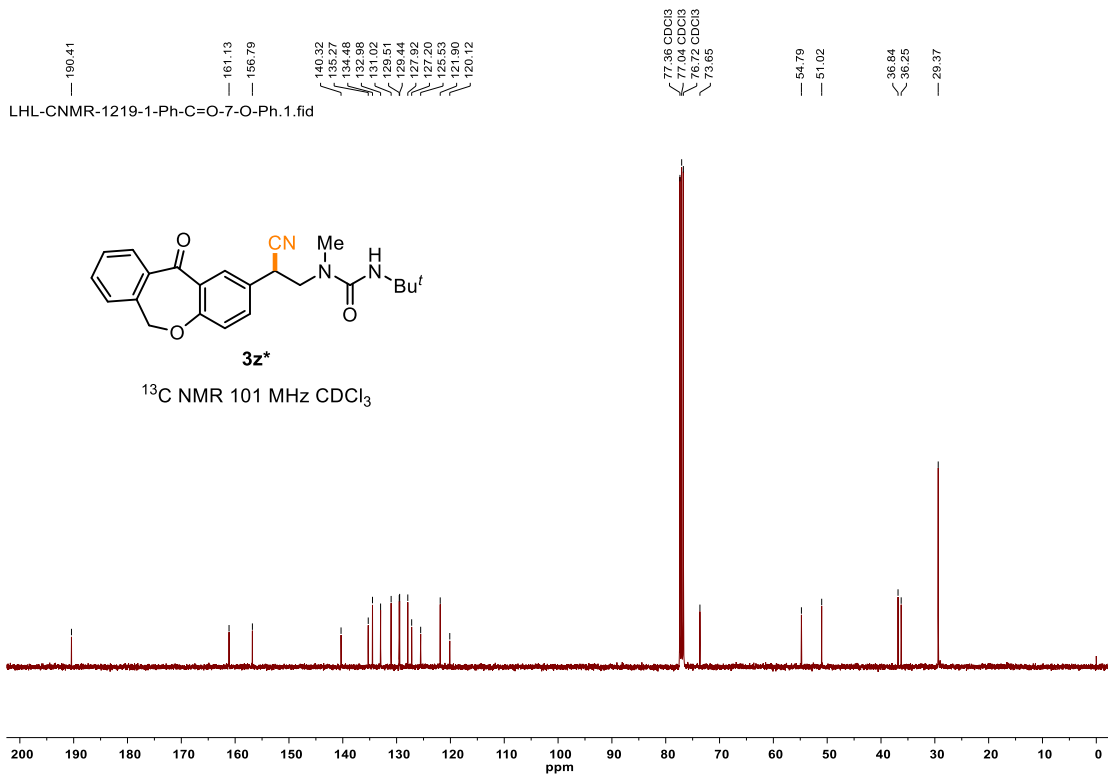

MYJ-0110-ibuprofen.2.fid

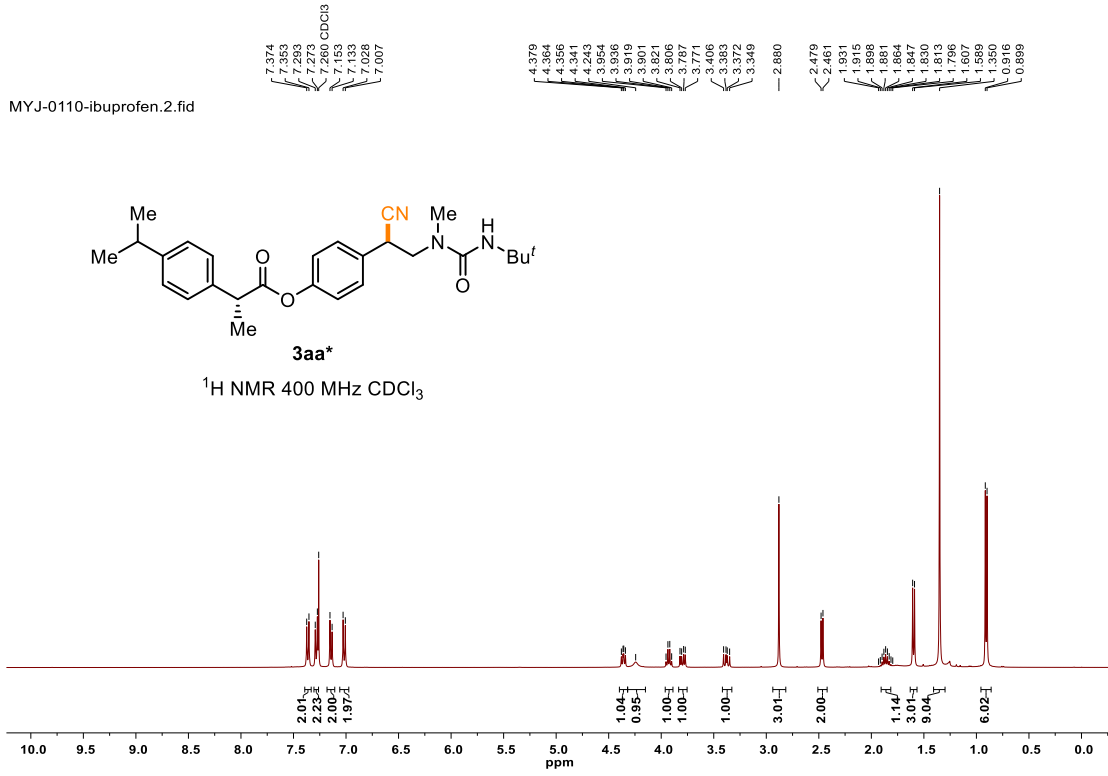

MYJ-0110-ibuprofen.3.fid

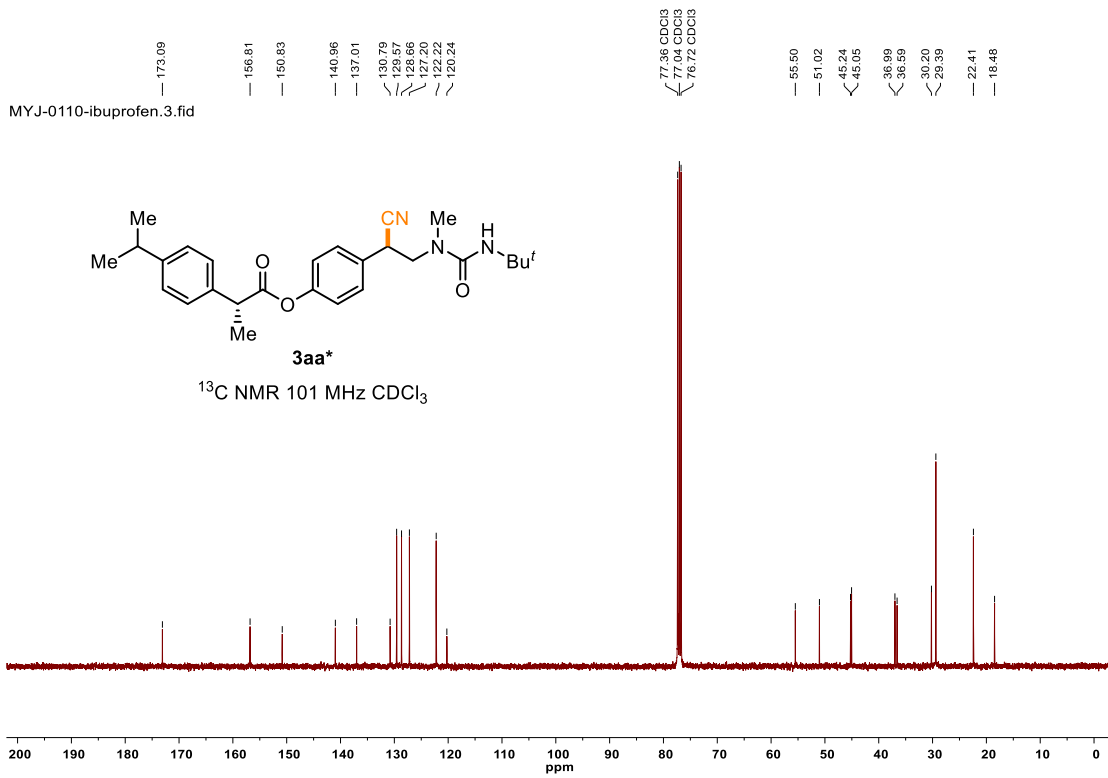

MYJ-3.2-Fe-HNMR.1.fid

7.462  
7.444  
7.280 CDCl<sub>3</sub>  
7.215  
7.197

4.654  
4.640  
4.510  
4.429  
4.411  
4.391  
4.295  
4.272  
3.877  
3.861  
3.847  
3.831  
3.466  
3.454  
3.399  
2.921

1.662 H<sub>2</sub>O  
1.362

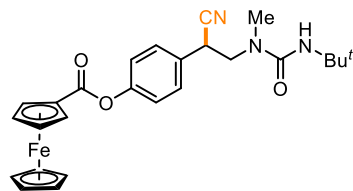

3ab\*

<sup>1</sup>H NMR 400 MHz CDCl<sub>3</sub>

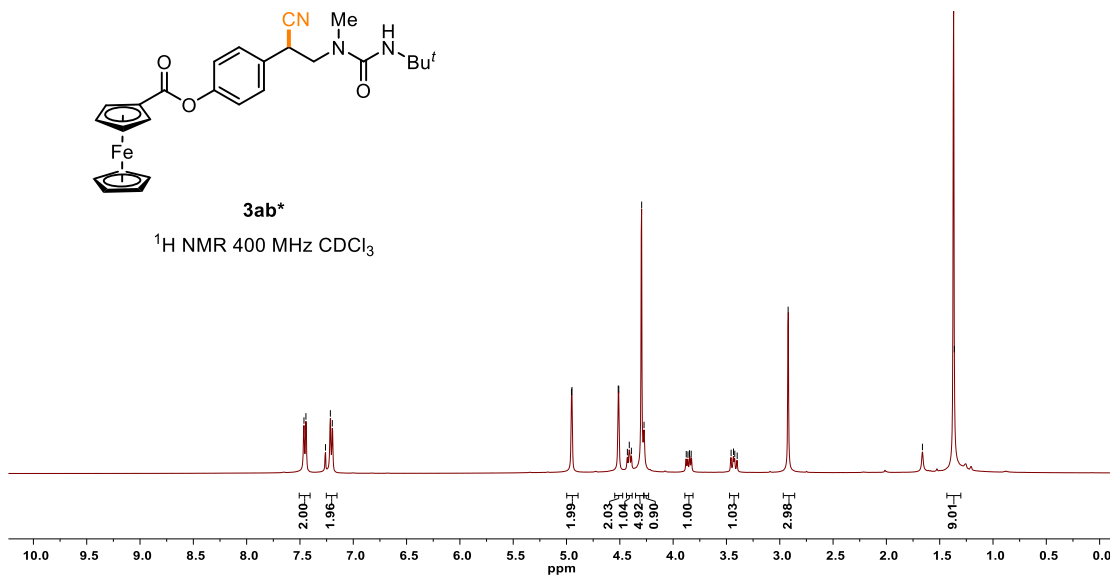

MYJ-3.2-Fe-CNMR.1.fid

170.23

156.85

150.91

130.64

128.78

122.50

120.30

77.36 CDCl<sub>3</sub>  
77.05 CDCl<sub>3</sub>  
76.70 CDCl<sub>3</sub>  
70.66  
70.00  
69.71

55.52

51.03

37.02

36.65

28.41

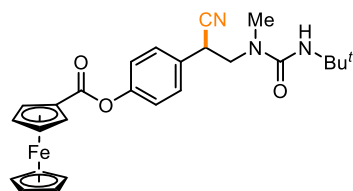

3ab\*

<sup>13</sup>C NMR 101 MHz CDCl<sub>3</sub>

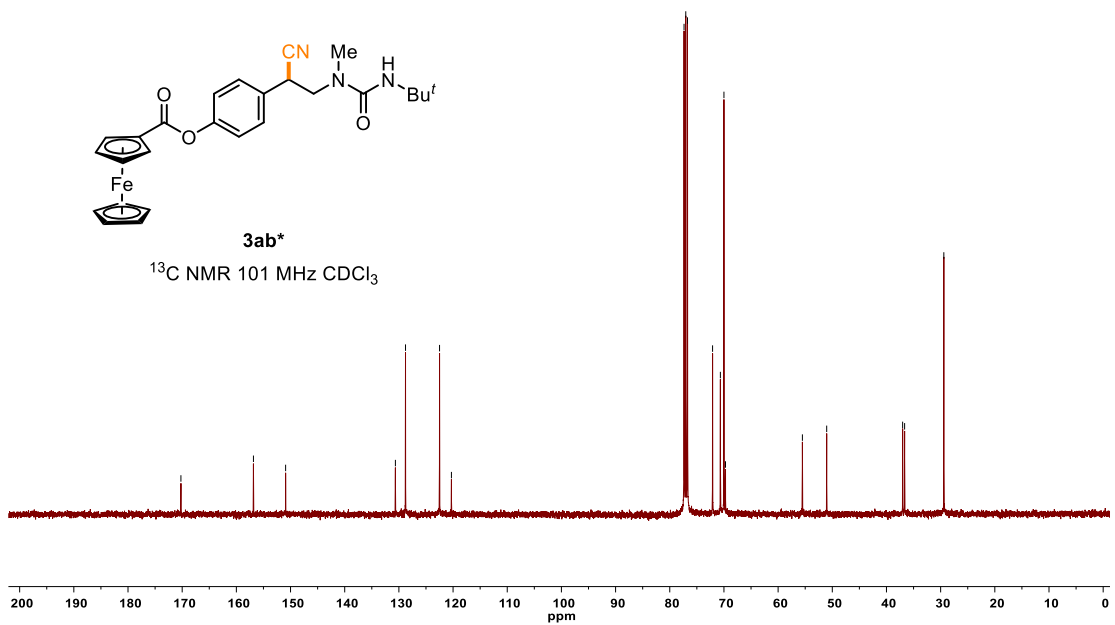

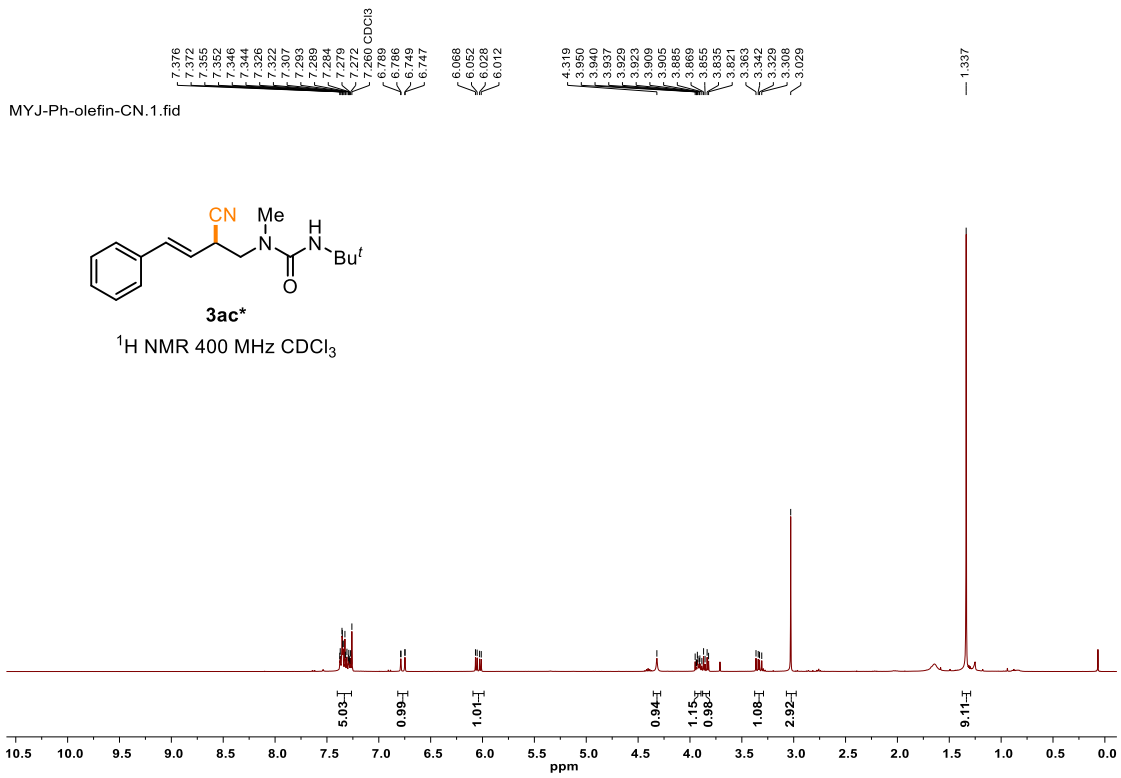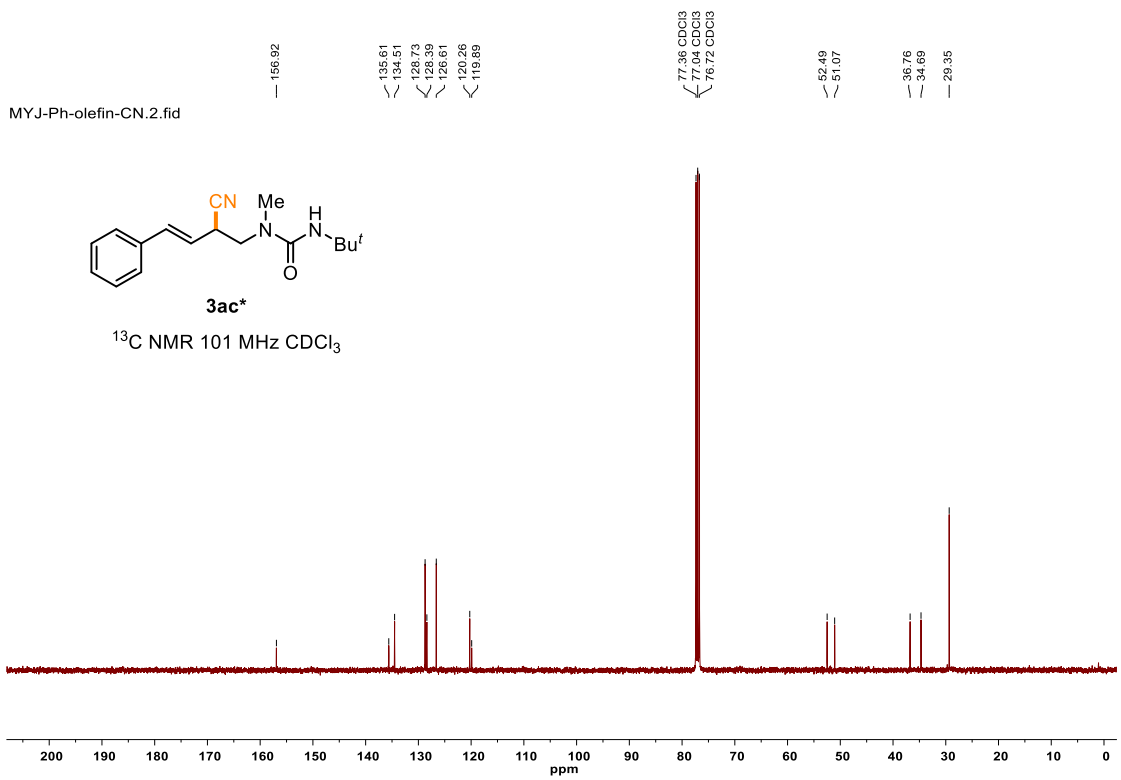

PQ-1-1/氢谱

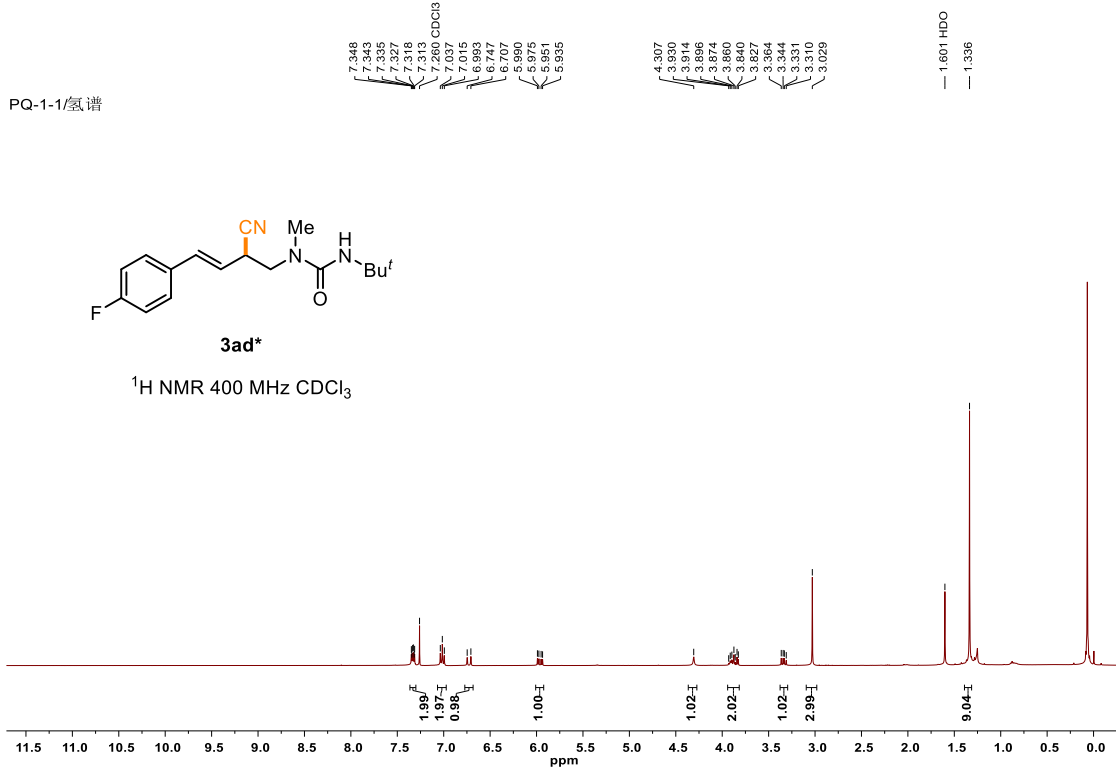

PQ-1-1/碳谱  
PQ-1-1 CDCl<sub>3</sub> 0312

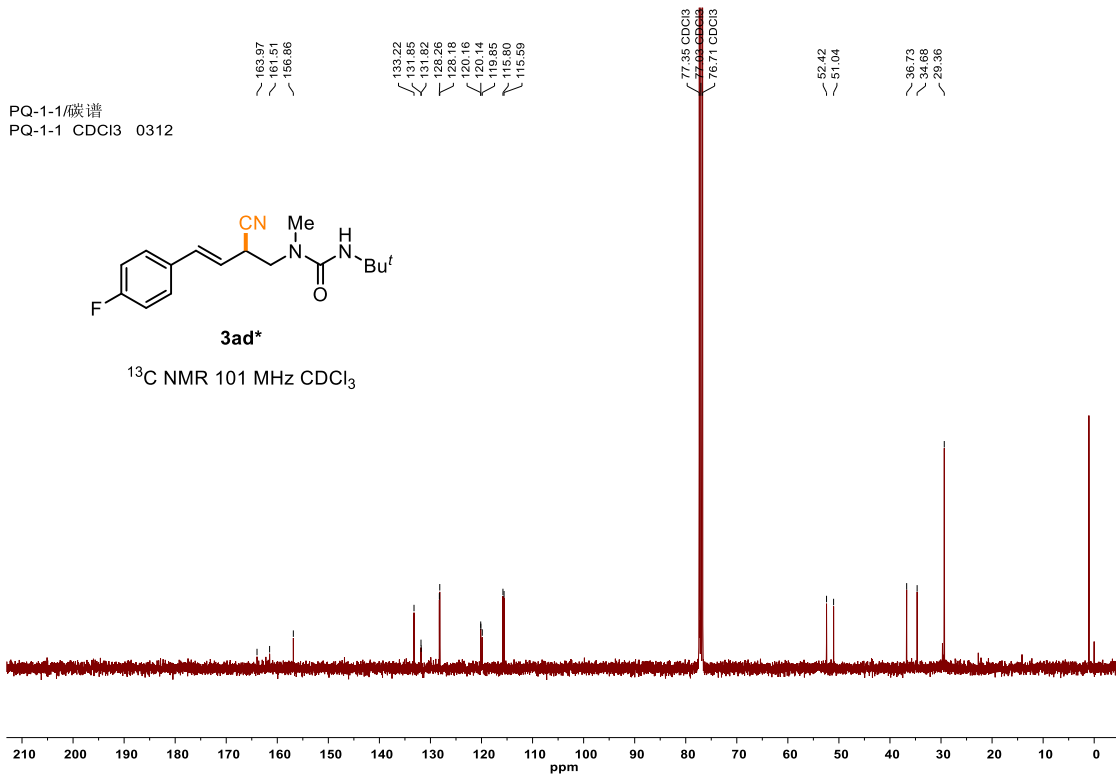

h60nihcyQE6Jdv+53pA6uQ.90800229.fid  
MYJ-0909-olefin-F CDCl<sub>3</sub> 0910

-113.151

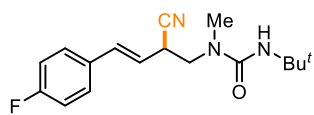

**3ad\***

<sup>19</sup>F NMR 376 MHz CDCl<sub>3</sub>

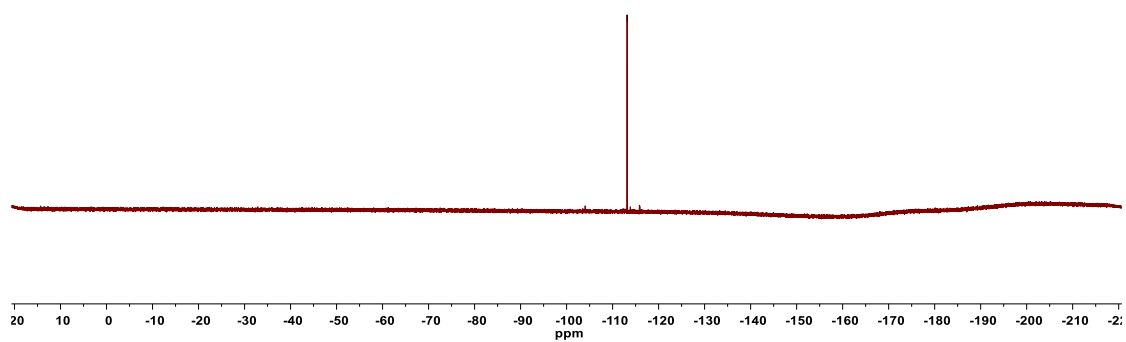

PQ-2-1/氢谱

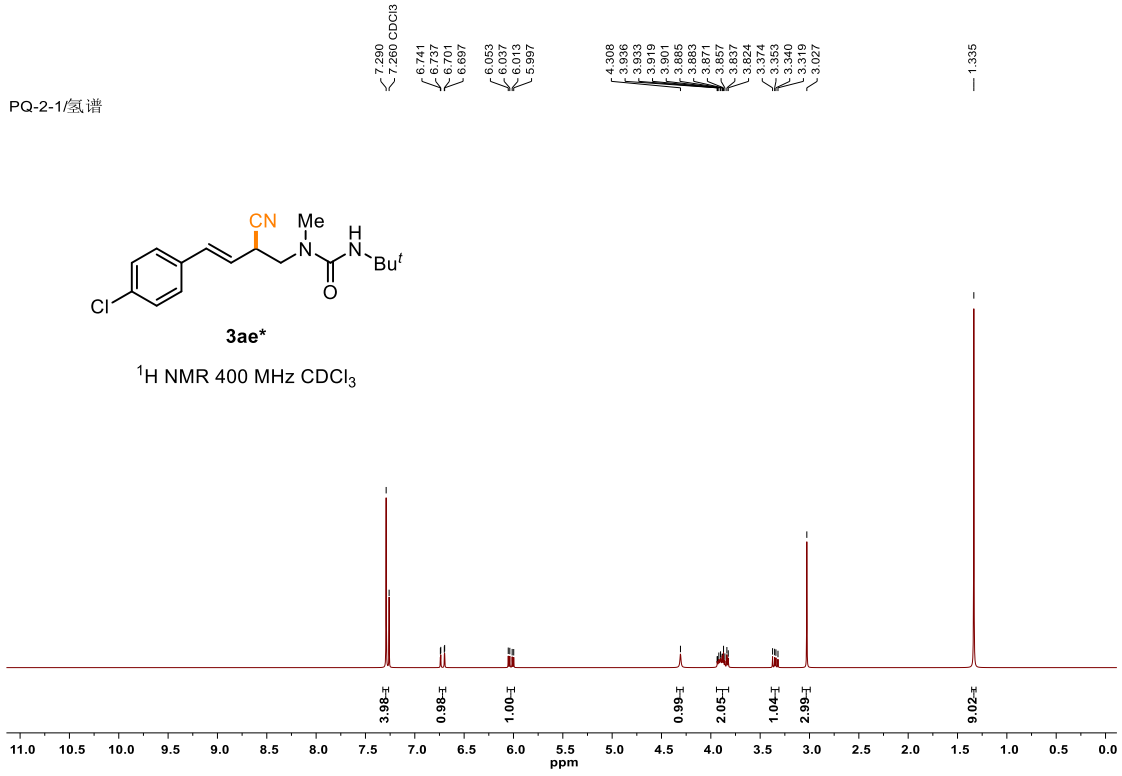

PQ-2-1/碳谱  
PQ-2-1 CDCl<sub>3</sub> 0312

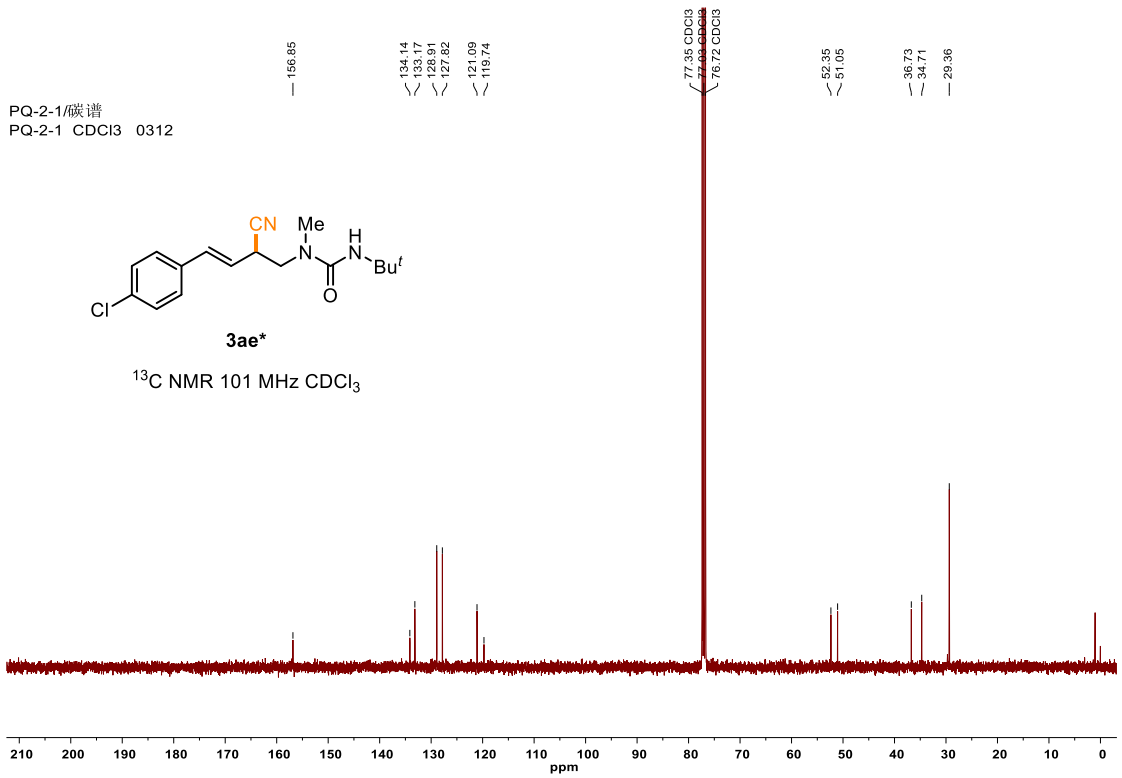



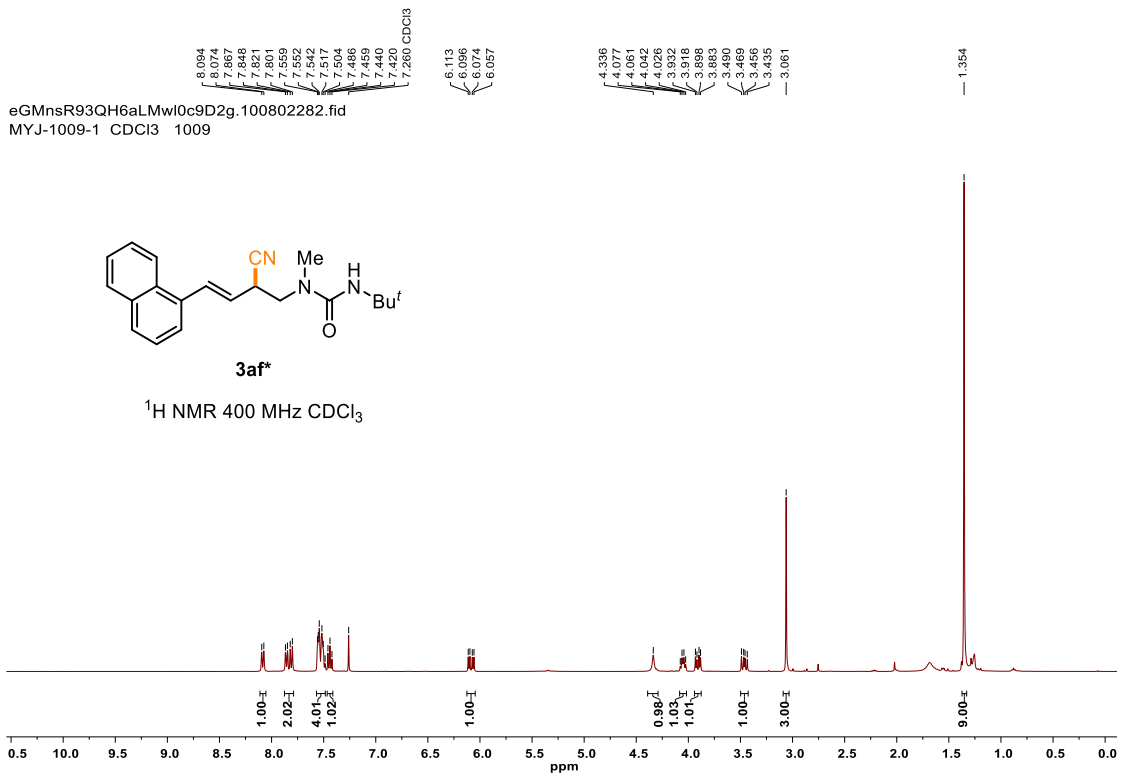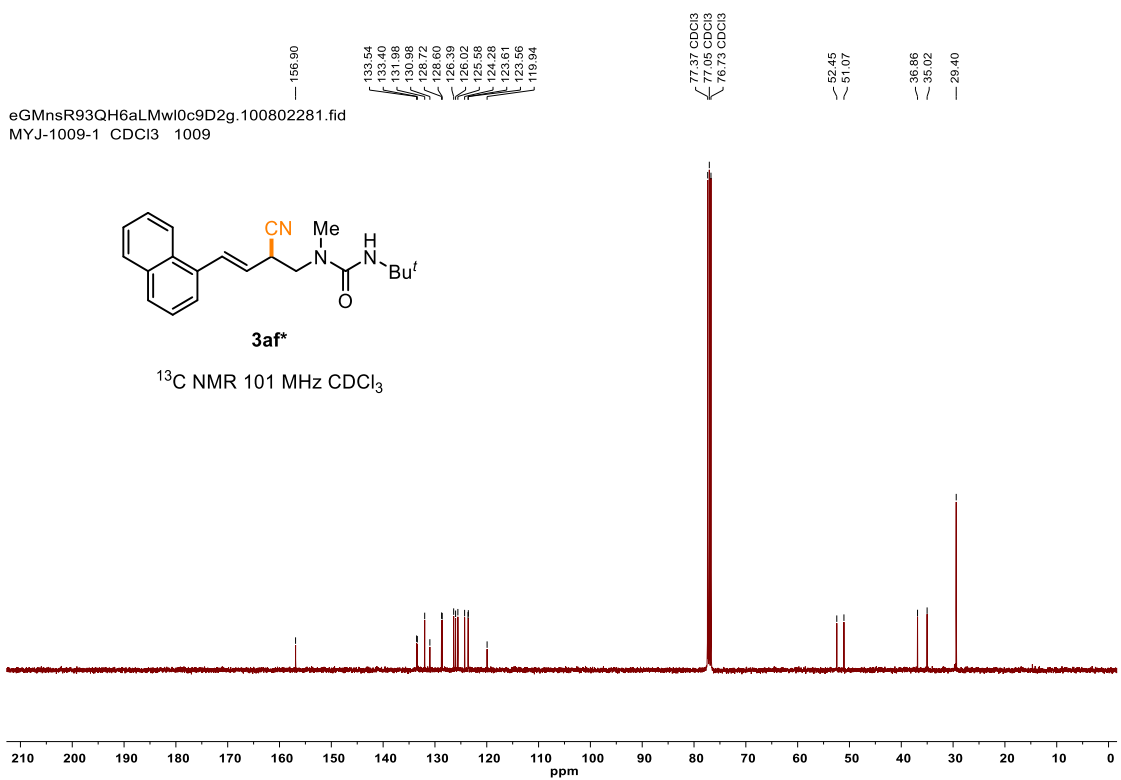

PQ-5-1.32801511.fid  
PQ-5-1 CDCl<sub>3</sub> 0328

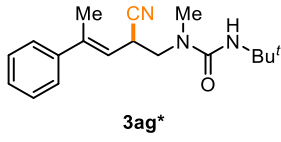

<sup>1</sup>H NMR 400 MHz CDCl<sub>3</sub>

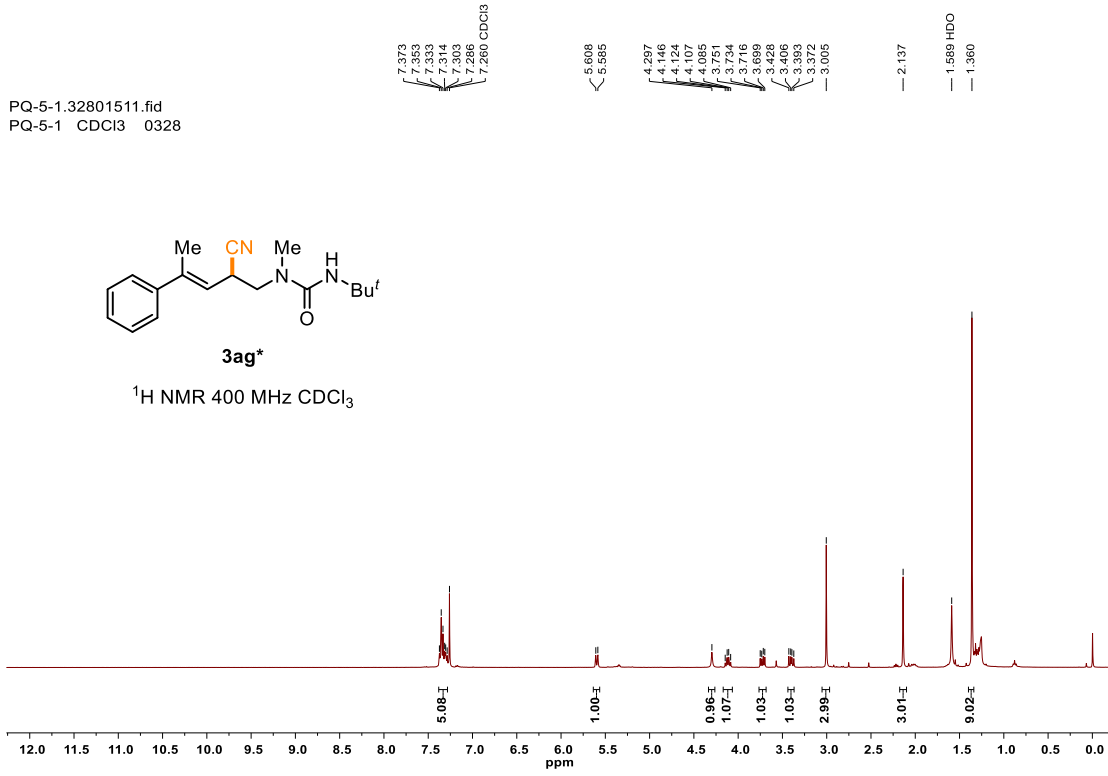

PQ-5-1.32801512.fid  
PQ-5-1 CDCl<sub>3</sub> 0328

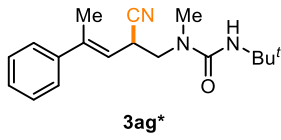

<sup>13</sup>C NMR 101 MHz CDCl<sub>3</sub>

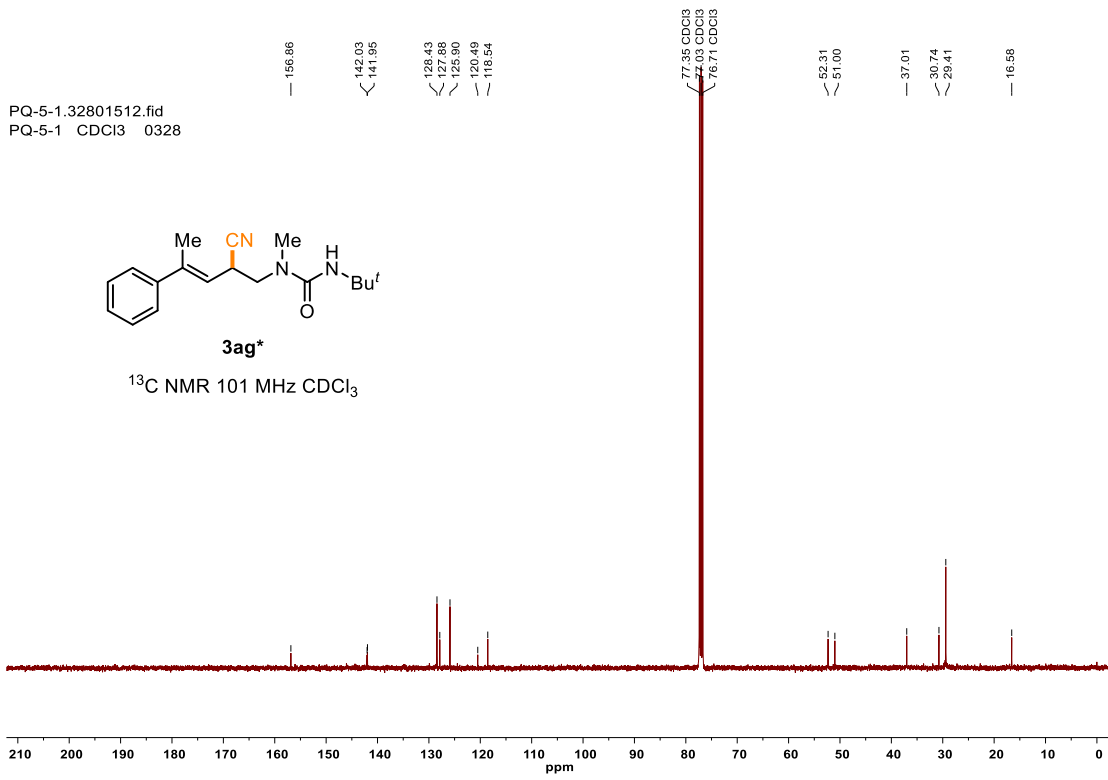

PQ-5-1.32801511.fid  
PQ-5-1 CDCl<sub>3</sub> 0328

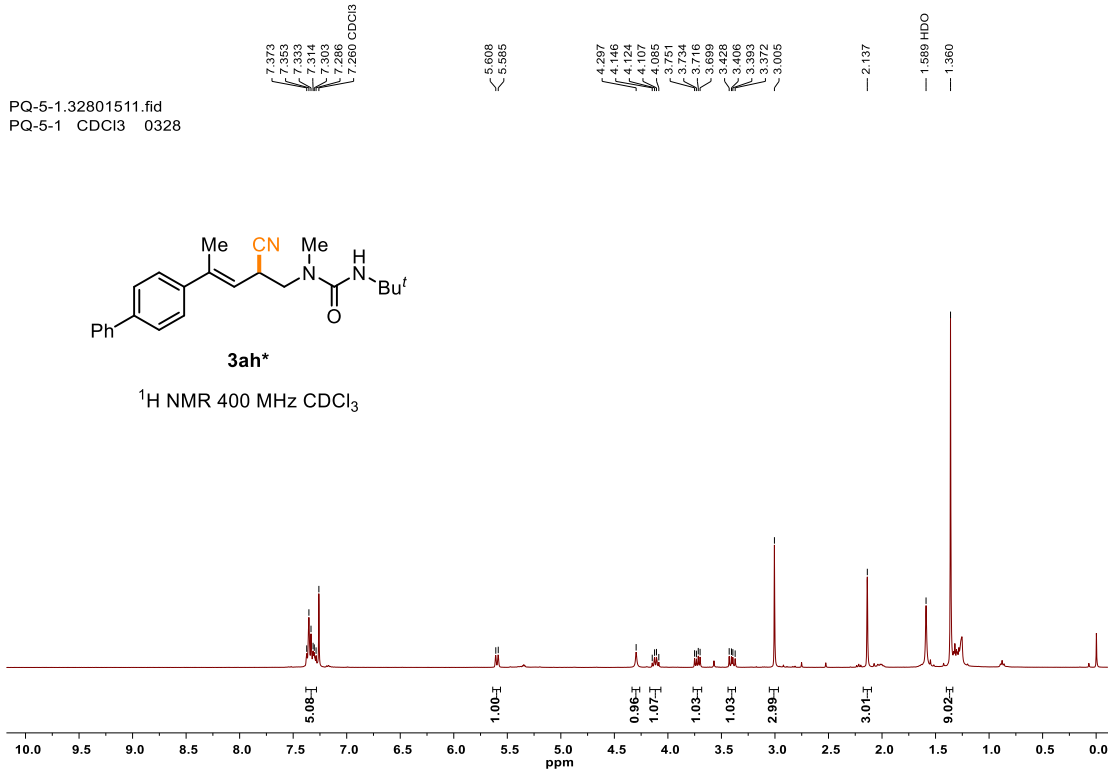

PQ-5-1.32801512.fid  
PQ-5-1 CDCl<sub>3</sub> 0328

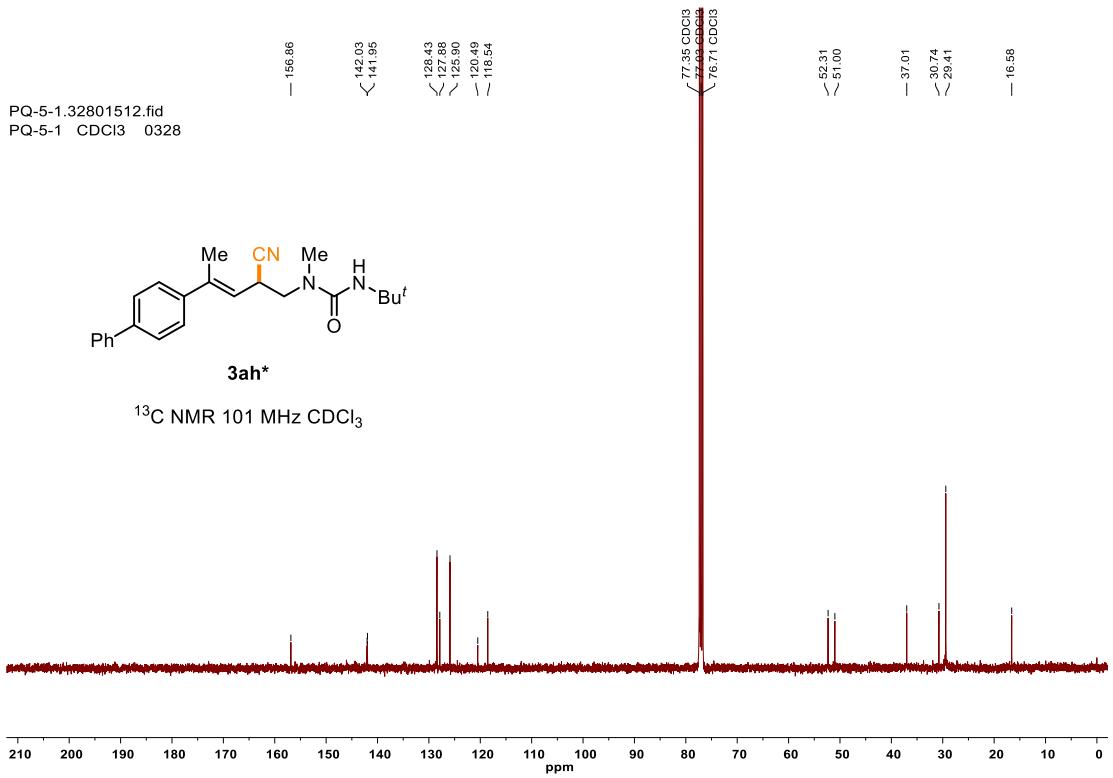

MYJ-PQ-9-1.1.fid

7.340  
7.338  
7.329  
7.326  
7.324  
7.314  
7.305  
7.302  
7.296  
7.293  
7.291  
7.287  
7.284  
7.282  
7.275  
7.271  
7.267  
7.260 CDCl<sub>3</sub>  
5.472  
5.456  
4.287  
4.106  
4.094  
4.083  
4.080  
4.081  
4.078  
4.075  
4.065  
3.678  
3.667  
3.655  
3.644  
3.479  
3.466  
3.456  
3.442  
2.992  
2.562  
2.552  
2.550  
2.538  
2.536  
2.524  
2.514  
2.504  
2.490  
2.477  
1.583 H<sub>2</sub>O  
1.401  
1.389  
1.388  
1.376  
1.372  
1.364  
1.351  
1.347  
1.335  
1.093  
0.891  
0.874

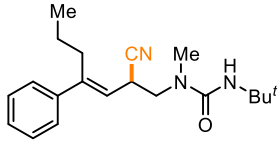

<sup>1</sup>H NMR 600 MHz CDCl<sub>3</sub>

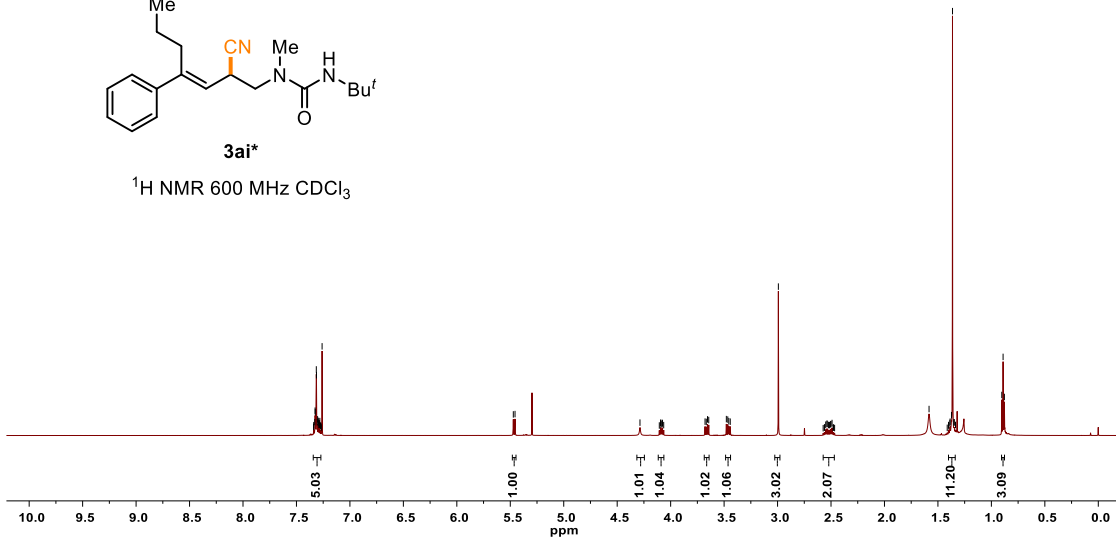

40802241\_20240411170508A193.40802241.fid  
PQ-3-1 CDCl<sub>3</sub> 0411

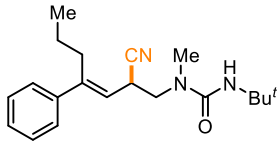

<sup>13</sup>C NMR 101 MHz CDCl<sub>3</sub>

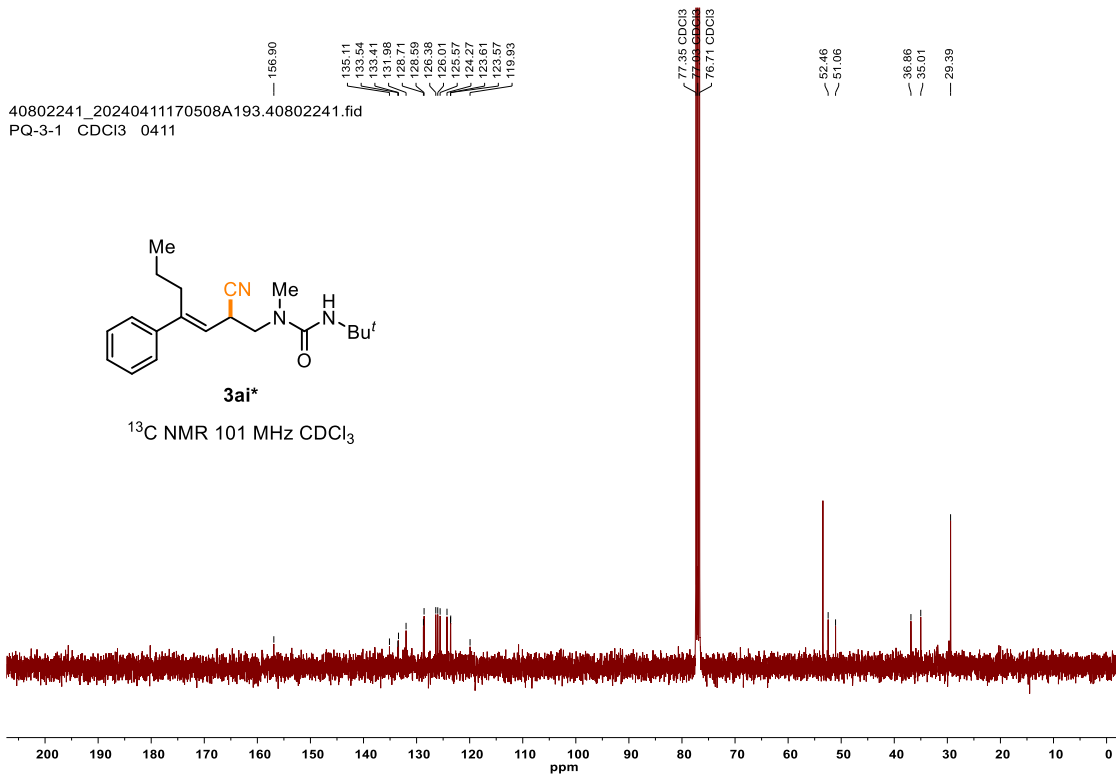

40702402\_20240409102404A025.40702402.fid  
 PA-ai-1 CDCl<sub>3</sub> 0408

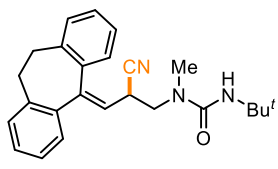

3aj\*  
<sup>1</sup>H NMR 400 MHz CDCl<sub>3</sub>

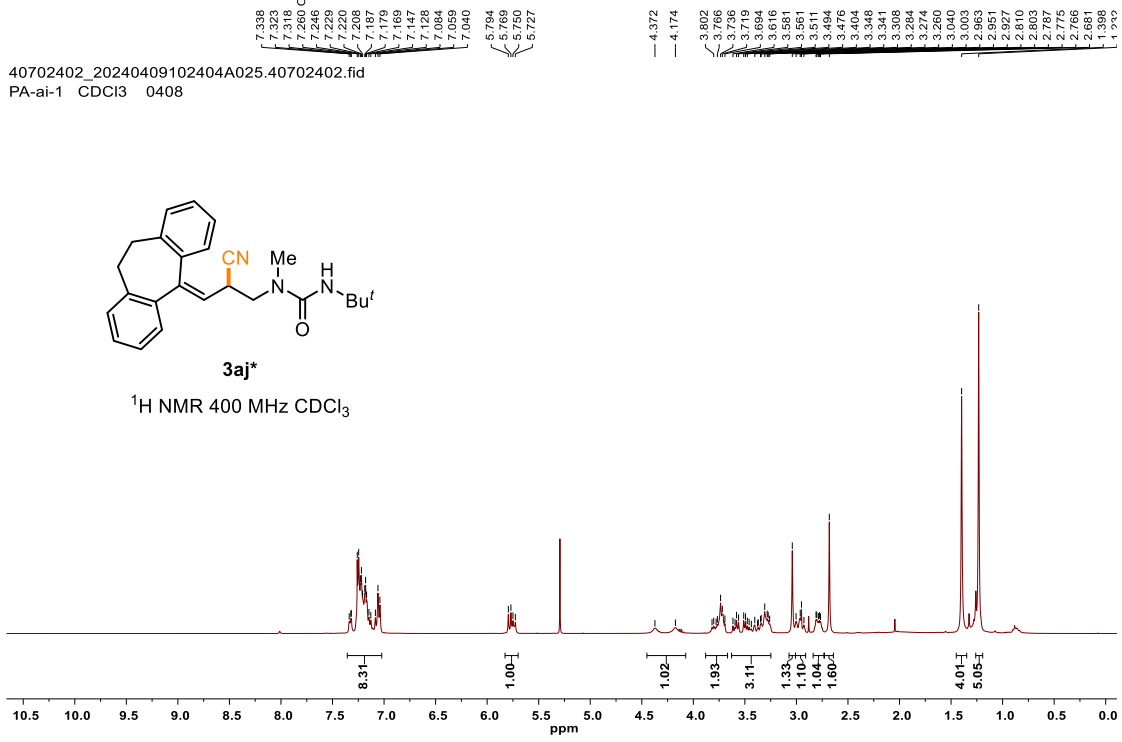

40702402\_20240409102404A025.40702401.fid  
 PA-ai-1 CDCl<sub>3</sub> 0408

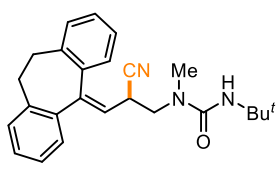

3aj\*  
<sup>13</sup>C NMR 101 MHz CDCl<sub>3</sub>

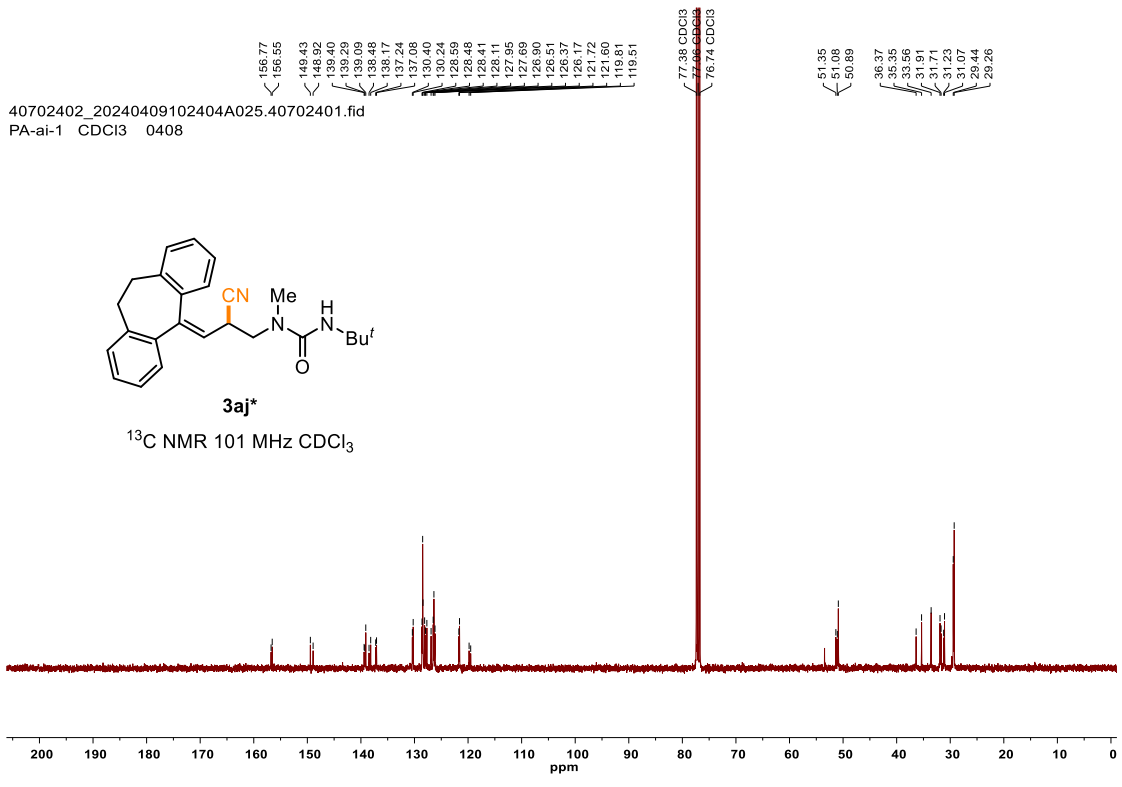

MYJ-PQ-1-CYCLE.1.fid

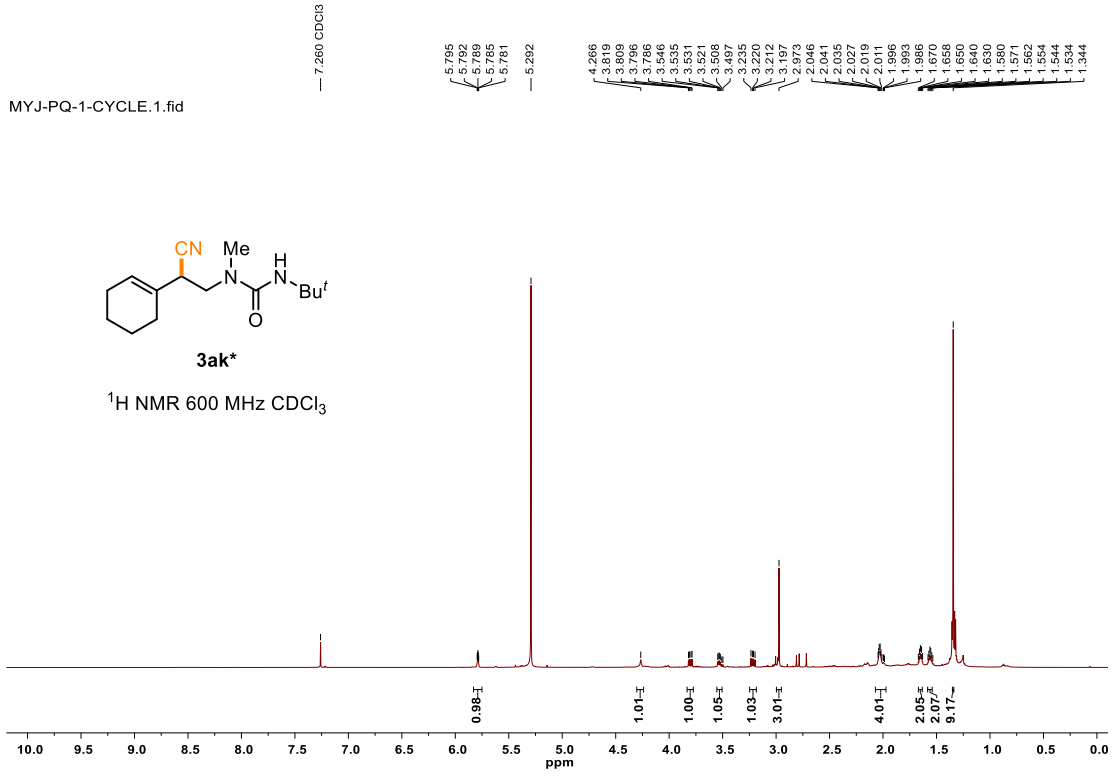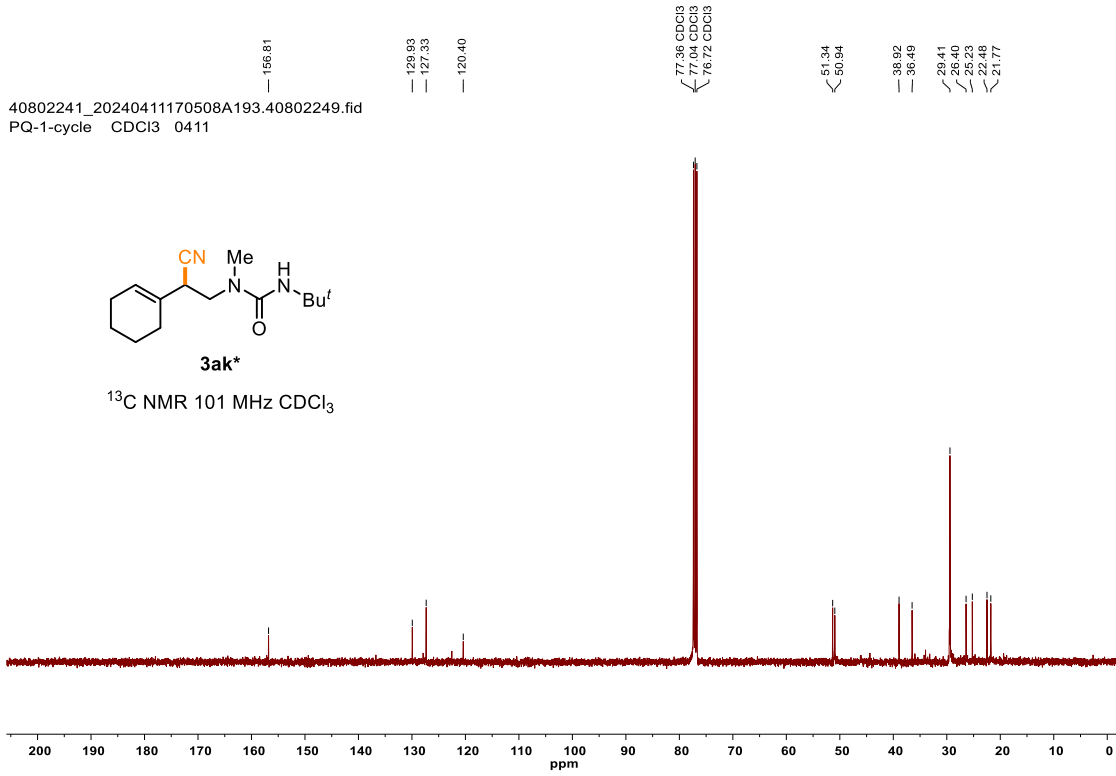

40802241\_20240411170508A193.40802249.fid  
PQ-1-cycle CDCl<sub>3</sub> 0411

4290065\_20240430094743A105.4290065.fid  
 MYJ-Nopol-0429 CDCl<sub>3</sub> 0429

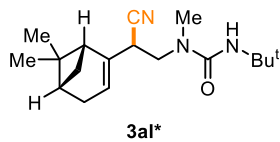

<sup>1</sup>H NMR 400 MHz CDCl<sub>3</sub>

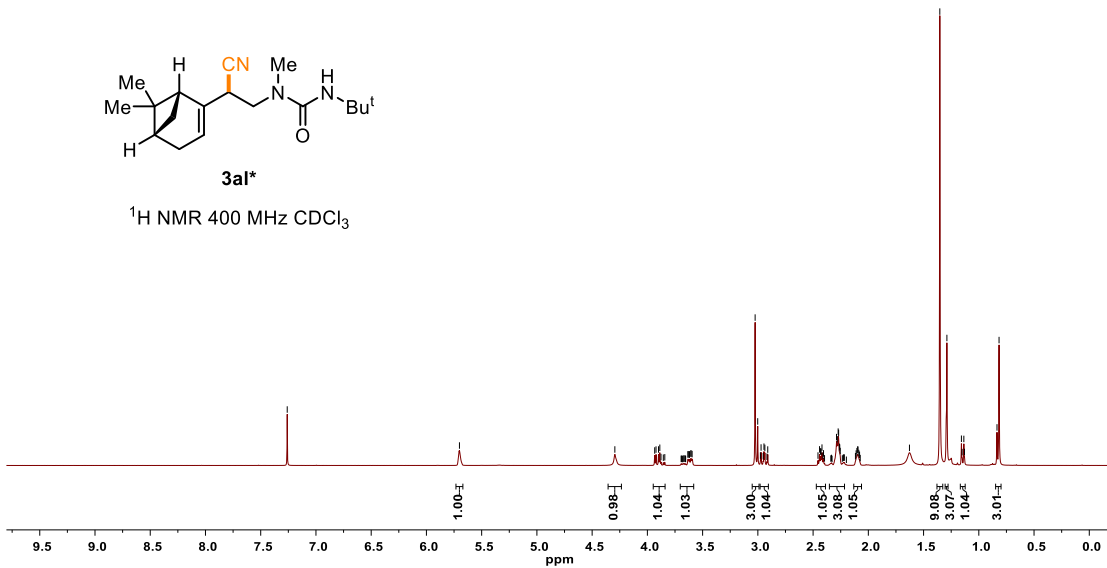

4300045\_20240430131740A135.4300045.fid  
 MYJ-nopol-0430 CDCl<sub>3</sub> 0430

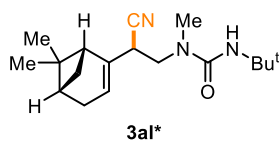

<sup>13</sup>C NMR 101 MHz CDCl<sub>3</sub>

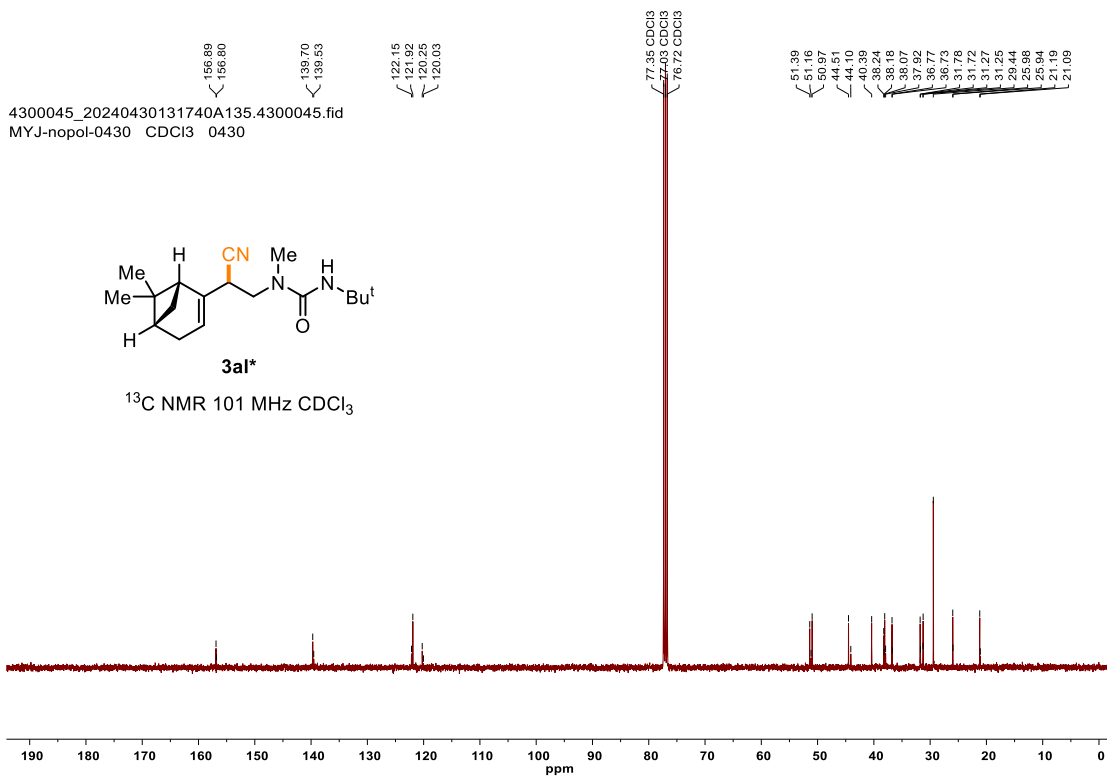

Supplement: Supplementary file 1 [file bdd14065230325b3b50835c8.pdf]
